# Supplementary material
Source: publisher figshare collection journal article supplement (https://acs.figshare.com/ndownloader/files/4033195)
Supplement: Supplementary file 1 [file 4033195]

data_hl3011

_audit_creation_method            SHELXL-2013
_chemical_name_systematic
;
 ?
;
_chemical_name_common             ?
_chemical_melting_point           ?
_chemical_formula_moiety           'C28 H25 N O2'
_chemical_formula_sum
 'C28 H25 N O2'
_chemical_formula_weight          407.49

loop_
 _atom_type_symbol
 _atom_type_description
 _atom_type_scat_dispersion_real
 _atom_type_scat_dispersion_imag
 _atom_type_scat_source
 'C'  'C'   0.0033   0.0016
 'International Tables Vol C Tables 4.2.6.8 and 6.1.1.4'
 'H'  'H'   0.0000   0.0000
 'International Tables Vol C Tables 4.2.6.8 and 6.1.1.4'
 'N'  'N'   0.0061   0.0033
 'International Tables Vol C Tables 4.2.6.8 and 6.1.1.4'
 'O'  'O'   0.0106   0.0060
 'International Tables Vol C Tables 4.2.6.8 and 6.1.1.4'

_space_group_crystal_system       monoclinic
_space_group_IT_number            14
_space_group_name_H-M_alt         'P 21/c'
_space_group_name_Hall            '-P 2ybc'

_shelx_space_group_comment
;
The symmetry employed for this shelxl refinement is uniquely defined
by the following loop, which should always be used as a source of
symmetry information in preference to the above space-group names.
They are only intended as comments.
;

loop_
 _space_group_symop_operation_xyz
 'x, y, z'
 '-x, y+1/2, -z+1/2'
 '-x, -y, -z'
 'x, -y-1/2, z-1/2'

_cell_length_a                    9.7088(3)
_cell_length_b                    11.6094(4)
_cell_length_c                    19.1012(7)
_cell_angle_alpha                 90
_cell_angle_beta                  98.573(3)
_cell_angle_gamma                 90
_cell_volume                      2128.89(13)
_cell_formula_units_Z             4
_cell_measurement_temperature     120(2)
_cell_measurement_reflns_used     14194
_cell_measurement_theta_min       2.8335
_cell_measurement_theta_max       29.6844

_exptl_crystal_description        block
_exptl_crystal_colour             colourless
_exptl_crystal_density_meas       ?
_exptl_crystal_density_method     ?
_exptl_crystal_density_diffrn     1.271
_exptl_crystal_F_000              864
_exptl_transmission_factor_min    ?
_exptl_transmission_factor_max    ?
_exptl_crystal_size_max           0.339
_exptl_crystal_size_mid           0.204
_exptl_crystal_size_min           0.088
_exptl_absorpt_coefficient_mu     0.079
_shelx_estimated_absorpt_T_min    0.974
_shelx_estimated_absorpt_T_max    0.993
_exptl_absorpt_correction_type    gaussian
_exptl_absorpt_correction_T_min   0.981
_exptl_absorpt_correction_T_max   0.994
_exptl_absorpt_process_details
;
CrysAlisPro, Agilent Technologies,
Version 1.171.36.20 (release 27-06-2012 CrysAlis171 .NET)
(compiled Jul 11 2012,15:38:31)
Numerical absorption correction based on gaussian integration over
   a multifaceted crystal model
;

_exptl_special_details
;
 ?
;

_diffrn_ambient_temperature       120(2)
_diffrn_radiation_wavelength      0.71073
_diffrn_radiation_type            MoK\a
_diffrn_source                    ?
_diffrn_measurement_device_type   'Agilent Technologies SuperNova'
_diffrn_measurement_method        '\w scans'
_diffrn_detector_area_resol_mean  10.3147
_diffrn_reflns_number             32193
_diffrn_reflns_av_unetI/netI      0.0256
_diffrn_reflns_av_R_equivalents   0.0504
_diffrn_reflns_limit_h_min        -11
_diffrn_reflns_limit_h_max        11
_diffrn_reflns_limit_k_min        -14
_diffrn_reflns_limit_k_max        14
_diffrn_reflns_limit_l_min        -23
_diffrn_reflns_limit_l_max        23
_diffrn_reflns_theta_min          2.839
_diffrn_reflns_theta_max          25.499
_diffrn_reflns_theta_full         25.242
_diffrn_measured_fraction_theta_max   0.998
_diffrn_measured_fraction_theta_full  0.998
_diffrn_reflns_Laue_measured_fraction_max    0.998
_diffrn_reflns_Laue_measured_fraction_full   0.998
_diffrn_reflns_point_group_measured_fraction_max   0.998
_diffrn_reflns_point_group_measured_fraction_full  0.998
_reflns_number_total              3959
_reflns_number_gt                 3624
_reflns_threshold_expression      'I > 2\s(I)'
_reflns_Friedel_coverage          0.000
_reflns_Friedel_fraction_max      .
_reflns_Friedel_fraction_full     .

_reflns_special_details
;
 Reflections were merged by SHELXL according to the crystal
 class for the calculation of statistics and refinement.

 _reflns_Friedel_fraction is defined as the number of unique
 Friedel pairs measured divided by the number that would be
 possible theoretically, ignoring centric projections and
 systematic absences.
;

_computing_data_collection        'CrysAlisPro (Agilent Technologies, 2011)'
_computing_cell_refinement        'CrysAlisPro (Agilent Technologies, 2011)'
_computing_data_reduction         'CrysAlisPro (Agilent Technologies, 2011)'
_computing_structure_solution     'SHELXTL (Sheldrick, 2008)'
_computing_structure_refinement   'SHELXL-2013 (Sheldrick, 2013)'
_computing_molecular_graphics     'SHELXTL (Sheldrick, 2008)'
_computing_publication_material   'SHELXTL (Sheldrick, 2008) and local programs'

_refine_special_details
;
The final residuals are a little high.  In the related structure hl3008 this 
was ascribed to disorder of the moiety defined by atoms O1 to C10, which was 
modelled successfully,  However, in structure hl3011 there is little evidence 
in the difference map to sustain this model.  The largest residual peak is only 
0.76 electrons high, located 0.86 A from H8.  It is, therefore, more 
appropriate to leave the model as ordered and to note the high residuals.

==============================================================================
>>> The Following Improvement and Query ALERTS were generated - (Acta-Mode) <<<
#==============================================================================
     Format: alert-number_ALERT_alert-type_alert-level text
 
094_ALERT_2_C Ratio of Maximum / Minimum Residual Density ....       2.75
097_ALERT_2_C Large Reported Max.  (Positive) Residual Density       0.76 eA-3

Noted above.

340_ALERT_3_C Low Bond Precision on  C-C Bonds ...............     0.0041 Ang
#==============================================================================
793_ALERT_4_G The Model has Chirality at C2      (Verify) ....          R
#==============================================================================

Insignificant.
;

_vrf_DIFMX01_hl3011
;
PROBLEM:  The maximum difference density is > 0.1*ZMAX*0.75
RESPONSE: See _refine_special_details.
;


_refine_ls_structure_factor_coef  Fsqd
_refine_ls_matrix_type            full
_refine_ls_weighting_scheme       calc
_refine_ls_weighting_details
'w=1/[\s^2^(Fo^2^)+(0.0419P)^2^+4.2223P] where P=(Fo^2^+2Fc^2^)/3'
_atom_sites_solution_primary      direct
_atom_sites_solution_secondary    difmap
_atom_sites_solution_hydrogens    geom
_refine_ls_hydrogen_treatment     constr
_refine_ls_extinction_method      none
_refine_ls_extinction_coef        .
_refine_ls_number_reflns          3959
_refine_ls_number_parameters      284
_refine_ls_number_restraints      0
_refine_ls_R_factor_all           0.0727
_refine_ls_R_factor_gt            0.0684
_refine_ls_wR_factor_ref          0.1687
_refine_ls_wR_factor_gt           0.1665
_refine_ls_goodness_of_fit_ref    1.129
_refine_ls_restrained_S_all       1.129
_refine_ls_shift/su_max           0.000
_refine_ls_shift/su_mean          0.000

loop_
 _atom_site_label
 _atom_site_type_symbol
 _atom_site_fract_x
 _atom_site_fract_y
 _atom_site_fract_z
 _atom_site_U_iso_or_equiv
 _atom_site_adp_type
 _atom_site_occupancy
 _atom_site_site_symmetry_multiplicity
 _atom_site_calc_flag
 _atom_site_refinement_flags_posn
 _atom_site_refinement_flags_adp
 _atom_site_refinement_flags_occupancy
 _atom_site_disorder_assembly
 _atom_site_disorder_group
O1 O 0.3662(2) 0.12789(18) 0.08116(11) 0.0329(5) Uani 1 1 d . . . . .
O2 O 0.1188(2) 0.47470(18) 0.09049(11) 0.0353(5) Uani 1 1 d . . . . .
N1 N 0.3888(2) 0.2687(2) 0.00176(13) 0.0323(6) Uani 1 1 d . . . . .
C1 C 0.3285(3) 0.2213(2) 0.05545(14) 0.0249(6) Uani 1 1 d . . . . .
C2 C 0.2045(3) 0.2843(2) 0.07973(13) 0.0215(5) Uani 1 1 d . . . . .
C3 C 0.1882(3) 0.4113(2) 0.05939(15) 0.0258(6) Uani 1 1 d . . . . .
C4 C 0.2557(3) 0.4488(3) -0.00045(15) 0.0288(6) Uani 1 1 d . . . . .
C5 C 0.2246(3) 0.5565(3) -0.03037(18) 0.0407(8) Uani 1 1 d . . . . .
H5 H 0.1573 0.6043 -0.0134 0.049 Uiso 1 1 calc R U . . .
C6 C 0.2931(4) 0.5943(3) -0.08593(18) 0.0472(9) Uani 1 1 d . . . . .
H6 H 0.2702 0.6667 -0.1077 0.057 Uiso 1 1 calc R U . . .
C7 C 0.3937(4) 0.5260(4) -0.10876(18) 0.0485(9) Uani 1 1 d . . . . .
H7 H 0.4415 0.5533 -0.1454 0.058 Uiso 1 1 calc R U . . .
C8 C 0.4257(3) 0.4213(3) -0.08013(16) 0.0428(8) Uani 1 1 d . . . . .
H8 H 0.4960 0.3761 -0.0964 0.051 Uiso 1 1 calc R U . . .
C9 C 0.3555(3) 0.3791(3) -0.02628(15) 0.0319(7) Uani 1 1 d . . . . .
C10 C 0.4939(4) 0.1988(4) -0.0268(2) 0.0507(9) Uani 1 1 d . . . . .
H10A H 0.4659 0.1882 -0.0779 0.076 Uiso 1 1 calc R U . . .
H10B H 0.5016 0.1234 -0.0034 0.076 Uiso 1 1 calc R U . . .
H10C H 0.5842 0.2380 -0.0182 0.076 Uiso 1 1 calc R U . . .
C11 C 0.2024(3) 0.2634(2) 0.15839(13) 0.0194(5) Uani 1 1 d . . . . .
C12 C 0.0935(2) 0.1971(2) 0.16904(14) 0.0202(5) Uani 1 1 d . . . . .
C13 C 0.0114(3) 0.1685(2) 0.09868(14) 0.0223(5) Uani 1 1 d . . . . .
C14 C -0.1070(3) 0.1017(2) 0.07867(16) 0.0274(6) Uani 1 1 d . . . . .
H14 H -0.1522 0.0652 0.1135 0.033 Uiso 1 1 calc R U . . .
C15 C -0.1589(3) 0.0888(3) 0.00661(16) 0.0321(7) Uani 1 1 d . . . . .
H15 H -0.2396 0.0431 -0.0071 0.038 Uiso 1 1 calc R U . . .
C16 C -0.0951(3) 0.1410(3) -0.04472(16) 0.0354(7) Uani 1 1 d . . . . .
H16 H -0.1320 0.1313 -0.0933 0.043 Uiso 1 1 calc R U . . .
C17 C 0.0238(3) 0.2081(3) -0.02559(15) 0.0316(7) Uani 1 1 d . . . . .
H17 H 0.0684 0.2447 -0.0606 0.038 Uiso 1 1 calc R U . . .
C18 C 0.0750(3) 0.2201(2) 0.04557(14) 0.0232(6) Uani 1 1 d . . . . .
C19 C 0.3171(3) 0.3161(2) 0.20881(13) 0.0204(5) Uani 1 1 d . . . . .
C20 C 0.4443(3) 0.2604(3) 0.22588(16) 0.0325(7) Uani 1 1 d . . . . .
H20 H 0.4580 0.1874 0.2055 0.039 Uiso 1 1 calc R U . . .
C21 C 0.5518(3) 0.3101(3) 0.27239(17) 0.0398(8) Uani 1 1 d . . . . .
H21 H 0.6381 0.2708 0.2836 0.048 Uiso 1 1 calc R U . . .
C22 C 0.5339(3) 0.4163(3) 0.30234(15) 0.0318(7) Uani 1 1 d . . . . .
H22 H 0.6077 0.4508 0.3336 0.038 Uiso 1 1 calc R U . . .
C23 C 0.4075(3) 0.4718(3) 0.28630(16) 0.0303(6) Uani 1 1 d . . . . .
H23 H 0.3936 0.5440 0.3076 0.036 Uiso 1 1 calc R U . . .
C24 C 0.3003(3) 0.4231(2) 0.23927(15) 0.0262(6) Uani 1 1 d . . . . .
H24 H 0.2146 0.4632 0.2278 0.031 Uiso 1 1 calc R U . . .
C25 C 0.0545(3) 0.1503(2) 0.23799(14) 0.0235(6) Uani 1 1 d . . . . .
C26 C 0.1511(3) 0.1913(3) 0.30385(15) 0.0310(6) Uani 1 1 d . . . . .
H26A H 0.2477 0.1721 0.2993 0.047 Uiso 1 1 calc R U . . .
H26B H 0.1255 0.1532 0.3458 0.047 Uiso 1 1 calc R U . . .
H26C H 0.1421 0.2749 0.3087 0.047 Uiso 1 1 calc R U . . .
C27 C -0.0938(3) 0.1891(2) 0.24630(16) 0.0289(6) Uani 1 1 d . . . . .
H27A H -0.0978 0.2735 0.2470 0.043 Uiso 1 1 calc R U . . .
H27B H -0.1180 0.1587 0.2907 0.043 Uiso 1 1 calc R U . . .
H27C H -0.1599 0.1599 0.2065 0.043 Uiso 1 1 calc R U . . .
C28 C 0.0652(3) 0.0180(2) 0.23692(15) 0.0270(6) Uani 1 1 d . . . . .
H28A H -0.0005 -0.0125 0.1973 0.041 Uiso 1 1 calc R U . . .
H28B H 0.0427 -0.0133 0.2815 0.041 Uiso 1 1 calc R U . . .
H28C H 0.1602 -0.0045 0.2312 0.041 Uiso 1 1 calc R U . . .

loop_
 _atom_site_aniso_label
 _atom_site_aniso_U_11
 _atom_site_aniso_U_22
 _atom_site_aniso_U_33
 _atom_site_aniso_U_23
 _atom_site_aniso_U_13
 _atom_site_aniso_U_12
O1 0.0348(11) 0.0299(11) 0.0343(11) -0.0029(9) 0.0066(9) 0.0089(9)
O2 0.0392(12) 0.0278(11) 0.0399(12) 0.0041(9) 0.0091(9) 0.0080(9)
N1 0.0272(12) 0.0423(15) 0.0289(13) -0.0057(11) 0.0087(10) 0.0014(11)
C1 0.0221(13) 0.0286(15) 0.0240(13) -0.0054(11) 0.0029(10) -0.0010(11)
C2 0.0213(12) 0.0215(13) 0.0223(13) 0.0002(10) 0.0049(10) 0.0001(10)
C3 0.0228(13) 0.0251(14) 0.0281(14) 0.0025(11) -0.0006(11) 0.0001(11)
C4 0.0274(14) 0.0294(15) 0.0272(14) 0.0081(12) -0.0040(11) -0.0085(12)
C5 0.0384(17) 0.0379(18) 0.0420(18) 0.0109(15) -0.0061(14) -0.0078(14)
C6 0.051(2) 0.047(2) 0.0416(19) 0.0145(16) -0.0003(15) -0.0097(17)
C7 0.047(2) 0.061(2) 0.0366(18) 0.0050(17) 0.0031(15) -0.0135(18)
C8 0.0360(17) 0.064(2) 0.0273(16) 0.0055(15) 0.0005(13) -0.0136(16)
C9 0.0253(14) 0.0463(18) 0.0228(14) 0.0011(13) -0.0006(11) -0.0108(13)
C10 0.0444(19) 0.064(3) 0.050(2) -0.0072(18) 0.0260(16) 0.0066(18)
C11 0.0199(12) 0.0166(12) 0.0221(13) 0.0001(10) 0.0044(10) 0.0049(10)
C12 0.0184(12) 0.0162(12) 0.0259(13) -0.0022(10) 0.0033(10) 0.0034(10)
C13 0.0206(12) 0.0187(13) 0.0271(14) -0.0029(10) 0.0022(10) 0.0044(10)
C14 0.0211(13) 0.0231(14) 0.0376(15) -0.0040(12) 0.0034(11) 0.0003(11)
C15 0.0213(13) 0.0304(16) 0.0418(17) -0.0107(13) -0.0041(12) 0.0011(12)
C16 0.0313(15) 0.0427(18) 0.0292(15) -0.0086(13) -0.0055(12) 0.0057(13)
C17 0.0318(15) 0.0362(17) 0.0259(14) -0.0021(12) 0.0013(11) 0.0027(13)
C18 0.0208(12) 0.0222(13) 0.0261(13) -0.0022(11) 0.0021(10) 0.0025(10)
C19 0.0196(12) 0.0204(13) 0.0221(12) 0.0000(10) 0.0058(10) -0.0021(10)
C20 0.0283(15) 0.0304(16) 0.0374(16) -0.0106(13) 0.0002(12) 0.0061(12)
C21 0.0225(14) 0.051(2) 0.0436(18) -0.0112(16) -0.0019(13) 0.0055(14)
C22 0.0254(14) 0.0406(17) 0.0295(15) -0.0068(13) 0.0041(11) -0.0116(13)
C23 0.0334(15) 0.0237(14) 0.0355(16) -0.0052(12) 0.0106(12) -0.0071(12)
C24 0.0232(13) 0.0215(14) 0.0350(15) -0.0016(12) 0.0075(11) -0.0007(11)
C25 0.0236(13) 0.0194(13) 0.0293(14) 0.0004(11) 0.0095(11) 0.0009(10)
C26 0.0404(16) 0.0303(16) 0.0237(14) 0.0011(12) 0.0090(12) -0.0059(13)
C27 0.0296(14) 0.0198(13) 0.0407(16) -0.0015(12) 0.0168(12) 0.0008(11)
C28 0.0296(14) 0.0208(14) 0.0319(15) 0.0023(11) 0.0083(11) 0.0035(11)

_geom_special_details
;
 All esds (except the esd in the dihedral angle between two l.s. planes)
 are estimated using the full covariance matrix.  The cell esds are taken
 into account individually in the estimation of esds in distances, angles
 and torsion angles; correlations between esds in cell parameters are only
 used when they are defined by crystal symmetry.  An approximate (isotropic)
 treatment of cell esds is used for estimating esds involving l.s. planes.
;

loop_
 _geom_bond_atom_site_label_1
 _geom_bond_atom_site_label_2
 _geom_bond_distance
 _geom_bond_site_symmetry_2
 _geom_bond_publ_flag
O1 C1 1.223(3) . ?
O2 C3 1.212(3) . ?
N1 C1 1.370(4) . ?
N1 C9 1.408(4) . ?
N1 C10 1.471(4) . ?
C1 C2 1.538(4) . ?
C2 C3 1.528(4) . ?
C2 C11 1.525(3) . ?
C2 C18 1.523(4) . ?
C3 C4 1.465(4) . ?
C4 C5 1.389(4) . ?
C4 C9 1.407(4) . ?
C5 H5 0.950 . ?
C5 C6 1.404(5) . ?
C6 H6 0.950 . ?
C6 C7 1.378(5) . ?
C7 H7 0.950 . ?
C7 C8 1.350(5) . ?
C8 H8 0.950 . ?
C8 C9 1.405(4) . ?
C10 H10A 0.980 . ?
C10 H10B 0.980 . ?
C10 H10C 0.980 . ?
C11 C12 1.348(4) . ?
C11 C19 1.491(3) . ?
C12 C13 1.494(4) . ?
C12 C25 1.523(4) . ?
C13 C14 1.393(4) . ?
C13 C18 1.398(4) . ?
C14 H14 0.950 . ?
C14 C15 1.402(4) . ?
C15 H15 0.950 . ?
C15 C16 1.376(5) . ?
C16 H16 0.950 . ?
C16 C17 1.396(4) . ?
C17 H17 0.950 . ?
C17 C18 1.383(4) . ?
C19 C20 1.389(4) . ?
C19 C24 1.391(4) . ?
C20 H20 0.950 . ?
C20 C21 1.392(4) . ?
C21 H21 0.950 . ?
C21 C22 1.381(5) . ?
C22 H22 0.950 . ?
C22 C23 1.379(4) . ?
C23 H23 0.950 . ?
C23 C24 1.390(4) . ?
C24 H24 0.950 . ?
C25 C26 1.529(4) . ?
C25 C27 1.539(4) . ?
C25 C28 1.540(4) . ?
C26 H26A 0.980 . ?
C26 H26B 0.980 . ?
C26 H26C 0.980 . ?
C27 H27A 0.980 . ?
C27 H27B 0.980 . ?
C27 H27C 0.980 . ?
C28 H28A 0.980 . ?
C28 H28B 0.980 . ?
C28 H28C 0.980 . ?

loop_
 _geom_angle_atom_site_label_1
 _geom_angle_atom_site_label_2
 _geom_angle_atom_site_label_3
 _geom_angle
 _geom_angle_site_symmetry_1
 _geom_angle_site_symmetry_3
 _geom_angle_publ_flag
C1 N1 C9 123.4(2) . . ?
C1 N1 C10 116.9(3) . . ?
C9 N1 C10 119.6(3) . . ?
O1 C1 N1 121.4(3) . . ?
O1 C1 C2 120.1(2) . . ?
N1 C1 C2 118.4(2) . . ?
C1 C2 C3 116.0(2) . . ?
C1 C2 C11 110.3(2) . . ?
C1 C2 C18 105.8(2) . . ?
C3 C2 C11 112.8(2) . . ?
C3 C2 C18 108.4(2) . . ?
C11 C2 C18 102.3(2) . . ?
O2 C3 C2 120.4(2) . . ?
O2 C3 C4 123.3(3) . . ?
C2 C3 C4 116.3(2) . . ?
C3 C4 C5 119.5(3) . . ?
C3 C4 C9 120.9(3) . . ?
C5 C4 C9 119.5(3) . . ?
C4 C5 H5 120.2 . . ?
C4 C5 C6 119.6(3) . . ?
H5 C5 C6 120.2 . . ?
C5 C6 H6 120.1 . . ?
C5 C6 C7 119.9(3) . . ?
H6 C6 C7 120.1 . . ?
C6 C7 H7 119.3 . . ?
C6 C7 C8 121.4(3) . . ?
H7 C7 C8 119.3 . . ?
C7 C8 H8 119.9 . . ?
C7 C8 C9 120.2(4) . . ?
H8 C8 C9 119.9 . . ?
N1 C9 C4 121.4(3) . . ?
N1 C9 C8 119.1(3) . . ?
C4 C9 C8 119.4(3) . . ?
N1 C10 H10A 109.5 . . ?
N1 C10 H10B 109.5 . . ?
N1 C10 H10C 109.5 . . ?
H10A C10 H10B 109.5 . . ?
H10A C10 H10C 109.5 . . ?
H10B C10 H10C 109.5 . . ?
C2 C11 C12 111.4(2) . . ?
C2 C11 C19 116.9(2) . . ?
C12 C11 C19 131.6(2) . . ?
C11 C12 C13 108.4(2) . . ?
C11 C12 C25 129.4(2) . . ?
C13 C12 C25 122.1(2) . . ?
C12 C13 C14 132.7(3) . . ?
C12 C13 C18 108.9(2) . . ?
C14 C13 C18 118.4(2) . . ?
C13 C14 H14 120.3 . . ?
C13 C14 C15 119.4(3) . . ?
H14 C14 C15 120.3 . . ?
C14 C15 H15 119.4 . . ?
C14 C15 C16 121.2(3) . . ?
H15 C15 C16 119.4 . . ?
C15 C16 H16 119.9 . . ?
C15 C16 C17 120.1(3) . . ?
H16 C16 C17 119.9 . . ?
C16 C17 H17 120.8 . . ?
C16 C17 C18 118.4(3) . . ?
H17 C17 C18 120.8 . . ?
C2 C18 C13 108.9(2) . . ?
C2 C18 C17 128.5(3) . . ?
C13 C18 C17 122.5(3) . . ?
C11 C19 C20 120.8(2) . . ?
C11 C19 C24 120.9(2) . . ?
C20 C19 C24 118.2(2) . . ?
C19 C20 H20 119.6 . . ?
C19 C20 C21 120.9(3) . . ?
H20 C20 C21 119.6 . . ?
C20 C21 H21 119.8 . . ?
C20 C21 C22 120.4(3) . . ?
H21 C21 C22 119.8 . . ?
C21 C22 H22 120.4 . . ?
C21 C22 C23 119.2(3) . . ?
H22 C22 C23 120.4 . . ?
C22 C23 H23 119.7 . . ?
C22 C23 C24 120.6(3) . . ?
H23 C23 C24 119.7 . . ?
C19 C24 C23 120.7(3) . . ?
C19 C24 H24 119.7 . . ?
C23 C24 H24 119.7 . . ?
C12 C25 C26 113.6(2) . . ?
C12 C25 C27 109.9(2) . . ?
C12 C25 C28 108.6(2) . . ?
C26 C25 C27 107.0(2) . . ?
C26 C25 C28 106.7(2) . . ?
C27 C25 C28 111.0(2) . . ?
C25 C26 H26A 109.5 . . ?
C25 C26 H26B 109.5 . . ?
C25 C26 H26C 109.5 . . ?
H26A C26 H26B 109.5 . . ?
H26A C26 H26C 109.5 . . ?
H26B C26 H26C 109.5 . . ?
C25 C27 H27A 109.5 . . ?
C25 C27 H27B 109.5 . . ?
C25 C27 H27C 109.5 . . ?
H27A C27 H27B 109.5 . . ?
H27A C27 H27C 109.5 . . ?
H27B C27 H27C 109.5 . . ?
C25 C28 H28A 109.5 . . ?
C25 C28 H28B 109.5 . . ?
C25 C28 H28C 109.5 . . ?
H28A C28 H28B 109.5 . . ?
H28A C28 H28C 109.5 . . ?
H28B C28 H28C 109.5 . . ?

loop_
 _geom_torsion_atom_site_label_1
 _geom_torsion_atom_site_label_2
 _geom_torsion_atom_site_label_3
 _geom_torsion_atom_site_label_4
 _geom_torsion
 _geom_torsion_site_symmetry_1
 _geom_torsion_site_symmetry_2
 _geom_torsion_site_symmetry_3
 _geom_torsion_site_symmetry_4
 _geom_torsion_publ_flag
C9 N1 C1 O1 -175.7(3) . . . . ?
C9 N1 C1 C2 8.4(4) . . . . ?
C10 N1 C1 O1 4.1(4) . . . . ?
C10 N1 C1 C2 -171.8(3) . . . . ?
O1 C1 C2 C3 165.1(2) . . . . ?
O1 C1 C2 C11 35.2(3) . . . . ?
O1 C1 C2 C18 -74.7(3) . . . . ?
N1 C1 C2 C3 -19.0(3) . . . . ?
N1 C1 C2 C11 -148.9(2) . . . . ?
N1 C1 C2 C18 101.2(3) . . . . ?
C1 C2 C3 O2 -160.9(2) . . . . ?
C1 C2 C3 C4 21.5(3) . . . . ?
C11 C2 C3 O2 -32.2(3) . . . . ?
C11 C2 C3 C4 150.2(2) . . . . ?
C18 C2 C3 O2 80.4(3) . . . . ?
C18 C2 C3 C4 -97.2(3) . . . . ?
O2 C3 C4 C5 -9.4(4) . . . . ?
O2 C3 C4 C9 168.1(3) . . . . ?
C2 C3 C4 C5 168.1(2) . . . . ?
C2 C3 C4 C9 -14.4(4) . . . . ?
C3 C4 C5 C6 177.6(3) . . . . ?
C9 C4 C5 C6 0.0(4) . . . . ?
C4 C5 C6 C7 -2.1(5) . . . . ?
C5 C6 C7 C8 1.9(5) . . . . ?
C6 C7 C8 C9 0.5(5) . . . . ?
C7 C8 C9 N1 178.8(3) . . . . ?
C7 C8 C9 C4 -2.6(4) . . . . ?
C3 C4 C9 N1 3.4(4) . . . . ?
C3 C4 C9 C8 -175.2(3) . . . . ?
C5 C4 C9 N1 -179.1(3) . . . . ?
C5 C4 C9 C8 2.4(4) . . . . ?
C1 N1 C9 C4 -0.2(4) . . . . ?
C1 N1 C9 C8 178.4(3) . . . . ?
C10 N1 C9 C4 -180.0(3) . . . . ?
C10 N1 C9 C8 -1.4(4) . . . . ?
C1 C2 C11 C12 -111.1(2) . . . . ?
C1 C2 C11 C19 68.2(3) . . . . ?
C3 C2 C11 C12 117.4(2) . . . . ?
C3 C2 C11 C19 -63.3(3) . . . . ?
C18 C2 C11 C12 1.1(3) . . . . ?
C18 C2 C11 C19 -179.6(2) . . . . ?
C2 C11 C12 C13 -0.7(3) . . . . ?
C2 C11 C12 C25 176.8(2) . . . . ?
C19 C11 C12 C13 -179.9(2) . . . . ?
C19 C11 C12 C25 -2.3(5) . . . . ?
C11 C12 C13 C14 178.2(3) . . . . ?
C11 C12 C13 C18 0.0(3) . . . . ?
C25 C12 C13 C14 0.5(4) . . . . ?
C25 C12 C13 C18 -177.8(2) . . . . ?
C12 C13 C14 C15 -178.5(3) . . . . ?
C18 C13 C14 C15 -0.4(4) . . . . ?
C13 C14 C15 C16 -0.1(4) . . . . ?
C14 C15 C16 C17 0.1(5) . . . . ?
C15 C16 C17 C18 0.2(4) . . . . ?
C16 C17 C18 C2 177.6(3) . . . . ?
C16 C17 C18 C13 -0.7(4) . . . . ?
C12 C13 C18 C2 0.7(3) . . . . ?
C12 C13 C18 C17 179.3(2) . . . . ?
C14 C13 C18 C2 -177.8(2) . . . . ?
C14 C13 C18 C17 0.7(4) . . . . ?
C1 C2 C18 C13 114.5(2) . . . . ?
C1 C2 C18 C17 -64.0(4) . . . . ?
C3 C2 C18 C13 -120.5(2) . . . . ?
C3 C2 C18 C17 61.1(4) . . . . ?
C11 C2 C18 C13 -1.1(3) . . . . ?
C11 C2 C18 C17 -179.5(3) . . . . ?
C2 C11 C19 C20 -84.8(3) . . . . ?
C2 C11 C19 C24 94.3(3) . . . . ?
C12 C11 C19 C20 94.3(4) . . . . ?
C12 C11 C19 C24 -86.6(4) . . . . ?
C11 C19 C20 C21 179.3(3) . . . . ?
C24 C19 C20 C21 0.2(4) . . . . ?
C19 C20 C21 C22 -0.2(5) . . . . ?
C20 C21 C22 C23 0.8(5) . . . . ?
C21 C22 C23 C24 -1.5(4) . . . . ?
C22 C23 C24 C19 1.6(4) . . . . ?
C11 C19 C24 C23 180.0(2) . . . . ?
C20 C19 C24 C23 -0.9(4) . . . . ?
C11 C12 C25 C26 3.5(4) . . . . ?
C11 C12 C25 C27 123.3(3) . . . . ?
C11 C12 C25 C28 -115.0(3) . . . . ?
C13 C12 C25 C26 -179.3(2) . . . . ?
C13 C12 C25 C27 -59.5(3) . . . . ?
C13 C12 C25 C28 62.2(3) . . . . ?

_refine_diff_density_max    0.760
_refine_diff_density_min   -0.276
_refine_diff_density_rms    0.059

_shelxl_version_number 2013-3

_shelx_res_file
;
TITL HL3011_refinalized in P2(1)/c
REM P2(1)/c (#14 in standard setting)
CELL 0.71073   9.708764  11.609371  19.101215  90.0000  98.5729  90.0000
ZERR    4.00   0.000305   0.000403   0.000663   0.0000   0.0029   0.0000
LATT  1
SYMM -x, y+1/2,-z+1/2
SFAC C H N O
UNIT 112 100 4 8
LIST 4 ! automatically inserted. Change 6 to 4 for CHECKCIF!!
acta
L.S. 16
omit -3 51
temp -153
size 0.088 0.204 0.339
rem colourless block
BOND $h
htab
conf
mpla o1 > c10
mpla 12 o1 o2 n1 c1 c3 > c10 c2
mpla c2 c11 > c18
mpla c19 > c24
FMAP 2
PLAN 10

WGHT    0.041900    4.222300
FVAR       2.93051
O1    4    0.366201    0.127886    0.081156    11.00000    0.03480    0.02992 =
         0.03431   -0.00287    0.00657    0.00891
O2    4    0.118800    0.474704    0.090491    11.00000    0.03920    0.02781 =
         0.03987    0.00410    0.00909    0.00803
N1    3    0.388831    0.268731    0.001764    11.00000    0.02719    0.04231 =
         0.02890   -0.00574    0.00870    0.00143
C1    1    0.328511    0.221268    0.055448    11.00000    0.02206    0.02857 =
         0.02400   -0.00537    0.00290   -0.00098
C2    1    0.204528    0.284270    0.079731    11.00000    0.02129    0.02154 =
         0.02226    0.00021    0.00486    0.00007
C3    1    0.188249    0.411348    0.059386    11.00000    0.02280    0.02507 =
         0.02810    0.00251   -0.00062    0.00012
C4    1    0.255683    0.448793   -0.000449    11.00000    0.02738    0.02941 =
         0.02716    0.00811   -0.00399   -0.00846
C5    1    0.224559    0.556485   -0.030367    11.00000    0.03842    0.03791 =
         0.04203    0.01087   -0.00608   -0.00776
AFIX  43
H5    2    0.157342    0.604271   -0.013352    11.00000   -1.20000
AFIX   0
C6    1    0.293098    0.594261   -0.085927    11.00000    0.05065    0.04734 =
         0.04155    0.01453   -0.00034   -0.00974
AFIX  43
H6    2    0.270152    0.666698   -0.107723    11.00000   -1.20000
AFIX   0
C7    1    0.393692    0.526047   -0.108763    11.00000    0.04701    0.06097 =
         0.03655    0.00504    0.00312   -0.01353
AFIX  43
H7    2    0.441499    0.553255   -0.145424    11.00000   -1.20000
AFIX   0
C8    1    0.425745    0.421349   -0.080129    11.00000    0.03604    0.06387 =
         0.02733    0.00554    0.00055   -0.01361
AFIX  43
H8    2    0.496045    0.376092   -0.096449    11.00000   -1.20000
AFIX   0
C9    1    0.355463    0.379129   -0.026280    11.00000    0.02527    0.04632 =
         0.02285    0.00115   -0.00055   -0.01075
C10   1    0.493916    0.198765   -0.026812    11.00000    0.04436    0.06391 =
         0.04974   -0.00719    0.02604    0.00660
AFIX 137
H10A  2    0.465946    0.188237   -0.077857    11.00000   -1.50000
H10B  2    0.501587    0.123423   -0.003416    11.00000   -1.50000
H10C  2    0.584211    0.238032   -0.018197    11.00000   -1.50000
AFIX   0
C11   1    0.202411    0.263393    0.158386    11.00000    0.01994    0.01658 =
         0.02209    0.00012    0.00442    0.00486
C12   1    0.093450    0.197083    0.169036    11.00000    0.01840    0.01616 =
         0.02591   -0.00220    0.00330    0.00336
C13   1    0.011446    0.168512    0.098684    11.00000    0.02064    0.01867 =
         0.02712   -0.00293    0.00219    0.00442
C14   1   -0.107011    0.101674    0.078675    11.00000    0.02109    0.02309 =
         0.03759   -0.00401    0.00337    0.00035
AFIX  43
H14   2   -0.152204    0.065180    0.113535    11.00000   -1.20000
AFIX   0
C15   1   -0.158891    0.088781    0.006606    11.00000    0.02131    0.03038 =
         0.04176   -0.01072   -0.00414    0.00110
AFIX  43
H15   2   -0.239642    0.043144   -0.007063    11.00000   -1.20000
AFIX   0
C16   1   -0.095086    0.140967   -0.044715    11.00000    0.03133    0.04267 =
         0.02919   -0.00859   -0.00551    0.00567
AFIX  43
H16   2   -0.132027    0.131266   -0.093275    11.00000   -1.20000
AFIX   0
C17   1    0.023785    0.208121   -0.025589    11.00000    0.03177    0.03623 =
         0.02593   -0.00213    0.00128    0.00265
AFIX  43
H17   2    0.068448    0.244740   -0.060602    11.00000   -1.20000
AFIX   0
C18   1    0.074985    0.220066    0.045572    11.00000    0.02079    0.02217 =
         0.02611   -0.00215    0.00214    0.00253
C19   1    0.317097    0.316107    0.208810    11.00000    0.01956    0.02036 =
         0.02207   -0.00003    0.00583   -0.00210
C20   1    0.444277    0.260386    0.225882    11.00000    0.02830    0.03045 =
         0.03742   -0.01062    0.00015    0.00605
AFIX  43
H20   2    0.458009    0.187377    0.205546    11.00000   -1.20000
AFIX   0
C21   1    0.551837    0.310124    0.272390    11.00000    0.02246    0.05110 =
         0.04361   -0.01125   -0.00192    0.00555
AFIX  43
H21   2    0.638108    0.270787    0.283610    11.00000   -1.20000
AFIX   0
C22   1    0.533911    0.416340    0.302336    11.00000    0.02538    0.04055 =
         0.02949   -0.00679    0.00412   -0.01158
AFIX  43
H22   2    0.607737    0.450768    0.333600    11.00000   -1.20000
AFIX   0
C23   1    0.407535    0.471808    0.286297    11.00000    0.03341    0.02371 =
         0.03550   -0.00515    0.01057   -0.00707
AFIX  43
H23   2    0.393644    0.544009    0.307586    11.00000   -1.20000
AFIX   0
C24   1    0.300278    0.423065    0.239271    11.00000    0.02319    0.02146 =
         0.03496   -0.00156    0.00755   -0.00066
AFIX  43
H24   2    0.214614    0.463207    0.227818    11.00000   -1.20000
AFIX   0
C25   1    0.054541    0.150302    0.237991    11.00000    0.02356    0.01945 =
         0.02933    0.00038    0.00951    0.00089
C26   1    0.151121    0.191323    0.303854    11.00000    0.04040    0.03030 =
         0.02368    0.00108    0.00902   -0.00592
AFIX 137
H26A  2    0.247672    0.172126    0.299282    11.00000   -1.50000
H26B  2    0.125476    0.153215    0.345839    11.00000   -1.50000
H26C  2    0.142127    0.274922    0.308662    11.00000   -1.50000
AFIX   0
C27   1   -0.093773    0.189116    0.246297    11.00000    0.02959    0.01980 =
         0.04073   -0.00146    0.01684    0.00076

AFIX 137
H27A  2   -0.097784    0.273451    0.246958    11.00000   -1.50000
H27B  2   -0.118045    0.158730    0.290744    11.00000   -1.50000
H27C  2   -0.159909    0.159878    0.206478    11.00000   -1.50000
AFIX   0
C28   1    0.065214    0.017969    0.236918    11.00000    0.02960    0.02076 =
         0.03188    0.00227    0.00834    0.00352
AFIX 137
H28A  2   -0.000462   -0.012529    0.197313    11.00000   -1.50000
H28B  2    0.042674   -0.013265    0.281509    11.00000   -1.50000
H28C  2    0.160221   -0.004505    0.231249    11.00000   -1.50000

REM #####

AFIX   0
HKLF 4

REM  HL3011_refinalized in P2(1)/c
REM R1 =  0.0684 for    3624 Fo > 4sig(Fo)  and  0.0727 for all    3959 data
REM    284 parameters refined using      0 restraints

END

WGHT      0.0419      4.2191

REM No hydrogen bonds found for HTAB generation

REM Highest difference peak  0.760,  deepest hole -0.276,  1-sigma level  0.059
Q1    1   0.5445  0.3142 -0.0873  11.00000  0.05    0.76
Q2    1   0.5100  0.4103 -0.1047  11.00000  0.05    0.70
Q3    1   0.4740  0.2776 -0.0343  11.00000  0.05    0.33
Q4    1   0.3964  0.4847 -0.0670  11.00000  0.05    0.31
Q5    1   0.1697  0.5942 -0.0009  11.00000  0.05    0.31
Q6    1   0.5499  0.4848 -0.1465  11.00000  0.05    0.22
Q7    1   0.1301  0.2622  0.1710  11.00000  0.05    0.21
Q8    1   0.2061  0.2782  0.1203  11.00000  0.05    0.21
Q9    1   0.1158  0.6027 -0.1427  11.00000  0.05    0.20
Q10   1   0.2585  0.4011 -0.0247  11.00000  0.05    0.20
;
_shelx_res_checksum   28617

_shelx_hkl_file
;
   0   0   3-2.15441 15.7541   3
   0   0  -3-9.66311 16.5135   1
   0   0  -4 248437. 3140.78   1
   0   0  -4 252062. 3009.27   6
   0   0   4 248707. 3095.33   2
   0   0   4 247365. 3008.07   6
   0   0   4 240073. 3065.79   3
   0   0   5 170.198 46.8242   2
   0   0  -5 192.569 51.9390   1
   0   0   5 209.591 37.6931   6
   0   0  -5 182.437 39.5624   6
   0   0   5 152.093 39.4737   3
   0   0  -6 94766.0 1458.71   1
   0   0   6 94607.6 1404.33   2
   0   0  -6 94337.6 1289.29   6
   0   0   6 93834.3 1371.87   3
   0   0   6 94164.7 1290.87   6
   0   0  -7 871.429 115.370   1
   0   0   7 771.003 92.9665   3
   0   0   7 877.072 81.0810   6
   0   0   7 890.633 106.095   2
   0   0  -7 1021.52 87.7749   6
   0   0   8 1759.45 113.132   6
   0   0   8 1860.50 152.000   4
   0   0   8 1748.03 144.051   2
   0   0  -8 1780.46 114.131   6
   0   0   8 1842.49 139.213   3
   0   0  -8 1602.71 152.136   1
   0   0   9 274.562 74.0536   4
   0   0   9 144.718 53.3316   2
   0   0   9 174.238 43.8474   6
   0   0  -9 201.728 65.4815   1
   0   0 -10 13918.6 513.575   1
   0   0  10 14186.1 470.182   4
   0   0  10 13793.4 381.372   6
   0   0  10 13777.3 471.759   2
   0   0  11 1641.39 170.109   2
   0   0 -11 2180.11 212.024   1
   0   0  11 2141.34 150.783   6
   0   0  12 23381.1 562.743   6
   0   0  12 22695.3 688.414   2
   0   0 -12 21942.9 727.514   1
   0   0  13 2932.18 191.870   6
   0   0  13 2522.53 232.899   2
   0   0 -13 2639.57 254.502   1
   0   0  14 2850.80 253.894   2
   0   0 -14 4142.23 281.401   3
   0   0 -14 3172.99 290.101   1
   0   0  14 4540.47 312.380   4
   0   0  14 3037.25 200.685   6
   0   0  15 1483.29 189.976   2
   0   0 -15 2412.31 226.311   3
   0   0 -15 1718.30 223.856   1
   0   0  15 2655.02 249.750   4
   0   0  15 1677.10 155.720   6
   0   0  16 4763.90 337.741   4
   0   0  16 3695.21 237.474   6
   0   0 -16 4308.55 309.807   3
   0   0  17 1260.71 190.026   4
   0   0 -17 1125.36 170.788   3
   0   0  18 1982.92 234.448   4
   0   0 -18 1757.03 212.062   3
   0   0 -19 991.528 166.540   3
   0   0  19 979.544 174.392   4
   0   0  20 1224.11 202.093   4
   0   0 -20 1129.23 182.934   3
   0   0 -21 562.040 135.373   3
   0   0  21 578.318 141.696   4
   0   0  22 470.661 128.920   4
   0   0 -22 419.866 114.089   3
   0   0 -23 307.058 110.413   3
   0   0  23 303.123 113.162   4
   0   0  24 1782.35 269.221   4
   0   0  25 368.004 130.632   4
   0   0  26 641.418 161.742   4
   0   1   3 10768.5 241.437   3
   0  -1   3 9186.30 239.236   2
   0  -1  -3 10980.0 253.430   4
   0   1  -3 8828.10 251.852   1
   0   1  -4 11795.2 314.717   1
   0  -1  -4 10413.2 223.865   6
   0  -1   4 11647.5 292.294   2
   0  -1  -4 10611.1 282.812   4
   0   1   4 10594.1 267.532   3
   0  -1  -5 25370.5 440.364   6
   0   1   5 26050.8 506.542   3
   0  -1   5 27085.5 538.556   2
   0  -1   5 26429.4 476.456   6
   0  -1  -5 24994.4 521.868   4
   0   1  -5 27376.3 572.306   1
   0  -1   6 1276.99 108.495   2
   0  -1  -6 1804.38 124.791   4
   0   1   6 1702.10 115.322   3
   0  -1  -6 1702.97 92.0693   6
   0  -1   6 1264.17 89.6730   6
   0   1  -6 1268.37 117.072   1
   0   1   6 1809.88 123.328   2
   0  -1  -7 2952.29 132.619   6
   0  -1   7 3196.93 184.454   2
   0  -1  -7 2834.49 172.057   4
   0   1   7 3045.37 167.379   3
   0   1   7 2854.71 169.870   2
   0   1  -7 3230.11 200.549   1
   0  -1   7 3133.88 149.731   6
   0  -1   8 18353.4 427.862   6
   0  -1   8 18596.1 506.691   2
   0   1   8 17975.4 478.211   3
   0   1  -8 17989.4 541.857   1
   0  -1  -8 18057.4 493.601   4
   0   1   8 17406.3 486.081   4
   0   1   8 17972.9 495.130   2
   0  -1  -8 17951.2 395.064   6
   0  -1   9 195.800 58.4440   2
   0   1   9 138.364 44.1395   4
   0  -1   9 230.044 45.0086   6
   0  -1  -9 165.530 36.5228   6
   0   1  -9 179.893 52.3569   1
   0   1   9 165.755 45.8079   3
   0   1   9 144.526 43.2238   2
   0  -1  10 14927.3 498.529   2
   0   1  10 14382.9 459.937   3
   0  -1  10 15570.6 418.267   6
   0   1  10 14058.6 471.757   4
   0   1  10 14597.3 489.334   2
   0  -1 -10 14644.0 381.478   6
   0   1 -10 14710.5 532.228   1
   0  -1  10 15733.7 500.092   4
   0   1 -11 3820.33 273.112   1
   0  -1 -11 3923.43 191.905   6
   0  -1 -11 3865.91 274.286   1
   0  -1  11 3853.15 204.501   6
   0   1  11 3989.15 253.579   2
   0  -1  11 3794.55 252.312   2
   0   1  11 3698.42 232.230   3
   0   1  12 16204.3 562.537   2
   0  -1 -12 16635.5 615.961   1
   0   1 -12 16873.7 622.483   1
   0  -1 -12 16220.2 439.355   6
   0  -1  12 17164.8 585.066   2
   0  -1  12 17452.9 481.304   6
   0   1  12 16149.1 534.908   3
   0   1  13 165.133 55.9998   3
   0  -1 -13 152.852 54.9571   3
   0  -1  13 136.342 60.2330   4
   0  -1 -13 97.7769 46.1101   1
   0  -1  13 201.612 70.9747   2
   0   1  13 83.6970 49.5221   2
   0  -1  13 91.5683 33.9574   6
   0  -1 -13 159.492 45.3823   6
   0   1 -13 168.015 69.5284   1
   0   1  13 112.315 47.3174   4
   0   1 -13 115.998 49.4889   3
   0  -1  14 4275.80 244.109   6
   0   1 -14 4351.51 286.518   3
   0   1  14 4356.63 303.736   2
   0  -1  14 4779.76 323.340   2
   0   1 -14 4582.99 340.879   1
   0   1  14 4025.48 277.948   3
   0  -1  14 4578.10 311.014   4
   0  -1 -14 4316.37 284.382   3
   0  -1 -14 4449.77 336.712   1
   0   1  14 4007.75 288.592   4
   0  -1 -15 70.4990 53.4587   1
   0  -1  15-7.58514 40.3314   2
   0  -1 -15 123.231 54.2183   3
   0   1 -15-36.4406 26.1192   3
   0   1 -15-23.1333 39.3038   1
   0   1  15 6.13184 30.4326   2
   0   1  15 56.8940 46.4855   4
   0  -1  15 14.1376 26.8574   6
   0  -1  15 48.7189 47.2537   4
   0  -1  16 2140.38 225.143   4
   0   1  16 2322.63 232.973   4
   0  -1  16 2176.84 184.650   6
   0   1 -16 2129.42 214.017   3
   0  -1 -16 2410.25 229.468   3
   0  -1 -17 399.714 100.884   3
   0  -1  17 410.284 102.621   4
   0   1  17 337.288 90.0308   4
   0  -1  17 488.783 92.5241   6
   0   1 -17 473.343 106.871   3
   0   1  18 8.21905 32.9923   4
   0  -1 -18 50.2423 48.2093   3
   0   1 -18-8.35364 29.0560   3
   0  -1  18 1.54773 39.9920   4
   0  -1  18-13.2881 33.9343   6
   0   1 -19 19.0848 35.2738   3
   0   1  19 12.5165 48.2862   4
   0  -1  19 29.3485 32.8589   6
   0  -1  19 57.4609 56.7697   4
   0  -1 -20 419.061 117.415   3
   0  -1  20 327.735 108.120   4
   0   1 -20 392.182 110.520   3
   0   1  20 213.533 82.6301   4
   0   1  21 7.93854 52.3152   4
   0   1 -21 121.567 72.7518   3
   0  -1  21 55.7059 39.1668   4
   0  -1 -21 156.104 77.8335   3
   0  -1  22-41.3320 62.3703   4
   0   1 -22 39.2765 54.2718   3
   0  -1 -22-107.393 66.0684   3
   0   1  22 72.5055 57.7228   4
   0  -1 -23 29.0256 51.4179   3
   0  -1  23 8.11724 46.0145   4
   0   1  23-5.38742 45.6119   4
   0   1 -23-24.8232 40.4246   3
   0   1  24 260.211 101.037   4
   0  -1  24 223.202 87.0568   4
   0  -1  25 236.388 108.081   4
   0   1  25-14.3859 52.9502   4
   0  -1  26 1397.33 247.387   4
   0   1  26 1727.09 272.403   4
   0   2   0 41925.3 644.508   1
   0  -2   0 42066.6 664.410   4
   0   2   1 541.332 52.3275   3
   0   2  -1 577.718 54.6085   1
   0  -2   1 584.903 54.0319   2
   0  -2  -1 516.359 53.3185   4
   0  -2  -2 662.738 63.2729   4
   0   2   2 696.623 59.2842   3
   0  -2   3 4889.52 184.376   2
   0  -2  -3 5928.74 203.134   4
   0   2   3 5804.30 190.139   3
   0   2  -3 4879.98 197.031   1
   0   2   4 12440.0 324.928   3
   0  -2  -4 12916.2 346.706   4
   0  -2   4 15030.0 365.430   2
   0   2  -4 15461.5 392.917   1
   0  -2  -5 983.308 90.3885   4
   0   2  -5 1349.61 118.233   1
   0   2   5 901.104 84.5407   3
   0  -2   5 1279.53 106.272   2
   0   2   6 14069.7 373.663   3
   0  -2  -6 13605.5 390.941   4
   0   2  -6 12842.1 413.274   1
   0  -2   6 12518.5 382.337   2
   0  -2  -7 6501.59 278.229   4
   0  -2   7 7916.08 309.787   2
   0  -2  -7 6718.26 216.725   6
   0   2  -7 7938.88 330.948   1
   0   2   7 6340.66 259.654   3
   0   2   8 5854.00 261.005   3
   0   2  -8 6684.25 319.933   1
   0  -2   8 6941.10 304.412   2
   0   2   8 6026.95 276.837   4
   0  -2  -8 5928.44 211.370   6
   0  -2   8 6698.26 255.155   6
   0  -2  -8 6122.14 280.003   4
   0  -2   9 2570.99 192.854   2
   0   2  -9 2525.34 205.505   1
   0  -2   9 2545.96 160.602   6
   0  -2  -9 2495.02 184.559   4
   0   2   9 2539.27 176.176   3
   0   2   9 2391.99 180.593   4
   0   2   9 2465.29 183.001   2
   0  -2  -9 2512.62 140.130   6
   0  -2 -10 11565.7 330.999   6
   0   2  10 11557.4 415.578   3
   0   2  10 11621.8 430.366   2
   0  -2 -10 11620.2 433.518   4
   0  -2  10 11371.3 371.957   6
   0   2 -10 11289.2 467.853   1
   0  -2  10 11390.4 442.165   2
   0  -2  11 5422.82 308.281   2
   0  -2 -11 5401.35 225.131   6
   0  -2 -11 5308.74 301.274   4
   0  -2  11 4784.48 131.392   5
   0  -2  11 5288.38 254.312   6
   0   2  11 5405.20 298.463   2
   0   2  11 5381.04 284.438   3
   0   2 -11 5594.26 334.838   1
   0   2  12 822.691 113.532   3
   0  -2  12 474.925 96.6195   2
   0   2 -12 578.204 115.807   1
   0   2  12 722.769 112.653   2
   0  -2 -12 545.076 41.5388   5
   0  -2 -12 766.657 86.4181   6
   0  -2  12 551.306 84.4243   6
   0  -2  13 5387.18 335.782   2
   0  -2  13 5507.87 278.461   6
   0  -2 -13 5369.55 244.509   6
   0   2  13 5584.57 332.702   2
   0  -2 -13 5412.94 313.270   3
   0   2 -13 5223.86 304.950   3
   0   2  13 5460.83 312.896   3
   0   2  13 5370.33 323.917   4
   0   2 -13 5402.75 358.358   1
   0   2 -13 5469.50 330.515   2
   0   2 -14 25.8751 33.2401   3
   0  -2  14-3.23150 30.0994   4
   0  -2  14 21.2376 26.1254   6
   0   2  14 21.6711 28.8833   3
   0  -2 -14 85.9248 52.9335   1
   0   2  14 70.4446 44.1307   4
   0   2  14 37.6444 29.3207   2
   0   2 -14 85.3468 49.3955   2
   0  -2 -14 77.7973 30.8999   6
   0  -2 -14 75.6828 41.7117   3
   0   2 -14 56.6448 62.7487   1
   0  -2  14 30.1841 35.1256   2
   0   2 -15 94.6146 47.6908   3
   0  -2 -15 148.984 59.5650   3
   0  -2 -15 203.988 50.7491   6
   0   2 -15 77.4072 54.3660   2
   0  -2  15 125.170 61.6450   4
   0  -2  15 125.180 48.3859   6
   0   2  15 219.971 71.7138   4
   0  -2  16 171.175 61.3843   4
   0   2  16 165.137 68.2012   4
   0  -2 -16 190.987 49.4394   6
   0  -2 -16 178.716 55.6660   3
   0  -2  16 140.494 57.2831   6
   0   2 -16 180.044 68.7305   3
   0  -2  17 1660.82 172.379   6
   0  -2 -17 1754.37 205.200   3
   0   2 -17 1580.50 192.871   3
   0   2  17 1759.08 213.143   4
   0  -2  17 1339.98 189.897   4
   0   2 -18 488.231 114.021   3
   0  -2  18 420.663 93.8214   6
   0  -2 -18 468.878 111.483   3
   0   2  18 582.130 126.539   4
   0  -2  18 462.929 116.184   4
   0  -2  19 3.87069 43.0740   4
   0  -2  19-69.3208 52.6275   6
   0   2 -19 44.3742 45.6393   3
   0  -2 -19 15.5440 41.2175   3
   0   2  19-49.3213 52.3319   4
   0   2  20 15.3522 51.4174   4
   0   2 -20-52.3417 58.4417   3
   0  -2 -20-7.61377 37.2671   3
   0  -2  20-58.2547 67.1302   4
   0   2 -21 48.9138 44.7368   3
   0  -2  21 29.2950 47.4405   4
   0  -2 -21 34.4229 64.5131   3
   0   2  21 58.9152 51.3226   4
   0  -2 -22 57.8845 53.7635   3
   0   2  22 47.1698 49.4113   4
   0  -2  22 50.8334 34.8771   4
   0   2 -22-37.3063 57.3427   3
   0   2  23 17.1435 35.0084   4
   0  -2 -23 26.4839 49.4671   3
   0   2 -23-81.9836 71.5556   3
   0  -2  23 45.8650 60.4705   4
   0   2  24 13.0437 45.3362   4
   0  -2  24 47.7001 44.2271   4
   0   2  25 267.941 106.135   4
   0  -2  25-64.3418 59.6894   4
   0  -3   0 695.355 73.0962   4
   0   3   0 655.852 66.8568   1
   0   3   1 88864.3 1270.86   1
   0   3   1 88453.7 1296.18   3
   0   3  -1 88014.9 1295.18   1
   0  -3   1 89212.7 1288.07   2
   0  -3  -1 91182.1 1324.61   4
   0   3  -2 624.214 71.1192   1
   0  -3  -2 337.598 54.4920   4
   0   3   2 322.736 50.8003   3
   0  -3   2 522.138 62.4281   2
   0   3   3 22413.6 475.367   3
   0  -3   3 19792.0 463.751   2
   0   3  -3 20475.6 487.129   1
   0  -3  -3 22802.5 500.590   4
   0  -3  -4 27940.3 599.518   4
   0   3   4 27732.4 574.424   3
   0   3  -4 28707.8 625.126   1
   0  -3   4 27842.3 589.509   2
   0   3   5 28610.1 602.305   3
   0   3  -5 29367.3 664.146   1
   0  -3  -5 28303.3 628.432   4
   0  -3   5 29121.5 628.616   2
   0   3  -6 2841.66 202.474   1
   0  -3   6 2698.08 181.211   2
   0  -3  -6 3001.05 193.556   4
   0   3   6 2573.12 165.907   3
   0   3   7 372.267 65.4223   3
   0  -3   7 308.996 65.0955   2
   0   3  -7 304.229 66.2145   1
   0   3   7 346.259 67.2454   4
   0  -3  -7 394.094 72.2404   4
   0   3   8 5232.03 252.456   3
   0   3  -8 5661.38 304.566   1
   0  -3  -8 4903.10 261.798   4
   0  -3   8 5782.86 286.231   2
   0   3   8 5256.51 269.577   4
   0   3  -9 602.759 106.220   1
   0  -3   9 540.730 96.6689   2
   0  -3  -9 693.485 78.2019   6
   0  -3  -9 626.366 100.786   4
   0   3   9 726.897 97.6137   3
   0  -3  10 612.249 87.5592   6
   0  -3  10 457.399 84.2103   2
   0  -3 -10 616.136 73.1947   6
   0   3 -10 554.943 107.808   1
   0   3  10 631.025 92.5765   3
   0  -3 -10 647.899 104.920   4
   0   3  11 410.072 79.9511   3
   0  -3 -11 302.772 55.0399   6
   0  -3  11 404.792 90.3651   2
   0   3 -11 320.704 83.6947   1
   0  -3  11 217.670 55.1223   6
   0  -3 -11 516.042 97.4744   4
   0   3  12 1248.55 156.018   4
   0  -3  12 1319.22 137.156   6
   0   3 -12 1235.88 167.786   1
   0   3  12 1323.40 157.752   2
   0   3 -12 1383.81 153.713   3
   0   3  12 1251.89 145.528   3
   0  -3  12 1352.83 167.678   2
   0  -3 -12 1266.42 147.966   3
   0   3 -12 1335.67 158.096   2
   0  -3 -12 1322.25 163.220   4
   0  -3  12 1356.49 179.462   1
   0  -3 -12 1302.93 116.191   6
   0   3 -13 232.724 72.6218   2
   0   3  13 210.066 64.6106   3
   0   3 -13 205.556 66.4772   3
   0  -3  13 236.240 60.4662   6
   0  -3  13 181.861 76.7997   1
   0   3 -13 240.910 83.4222   1
   0  -3  13 177.912 65.0959   2
   0   3  13 213.378 67.8294   4
   0  -3 -13 258.028 55.1005   6
   0  -3 -13 198.657 66.9092   4
   0   3  13 188.334 64.5134   2
   0  -3 -13 258.181 71.4165   3
   0   3 -14 2382.94 231.138   2
   0  -3 -14 1934.34 99.5565   5
   0  -3  14 2156.34 90.9355   5
   0   3  14 2197.14 208.241   3
   0  -3 -14 2281.48 220.455   3
   0  -3  14 2577.16 246.307   2
   0  -3  14 3058.96 286.728   1
   0   3 -14 2809.48 275.894   1
   0   3  14 2554.95 232.349   4
   0   3 -14 2568.27 226.061   3
   0  -3 -14 2306.95 166.608   6
   0  -3  14 2784.43 211.870   6
   0   3  14 2197.05 218.991   2
   0  -3 -14 2558.81 238.847   4
   0  -3 -15 9445.79 461.945   3
   0   3 -15 9081.67 469.337   2
   0  -3  15 9753.40 413.320   6
   0  -3 -15 9461.87 348.731   6
   0   3 -15 9955.23 461.496   3
   0   3  15 9223.56 464.797   4
   0   3 -16 517.836 114.817   3
   0  -3 -16 344.473 111.916   3
   0   3  16 352.715 98.3075   4
   0  -3 -16 332.625 69.1652   6
   0   3 -16 249.482 88.2339   2
   0  -3  16 424.919 96.7025   6
   0  -3 -17 746.094 102.255   6
   0   3 -17 816.034 143.877   3
   0  -3  17 915.091 165.313   4
   0  -3  17 905.926 130.839   6
   0  -3 -17 898.680 151.088   3
   0   3  17 784.040 148.721   4
   0   3 -17 783.163 149.986   2
   0  -3 -18 2297.28 247.812   3
   0  -3 -18 1962.20 171.227   6
   0  -3  18 1970.67 240.194   4
   0   3  18 1965.58 240.728   4
   0  -3  18 1935.29 199.022   6
   0   3 -18 1865.81 221.149   3
   0  -3  19 191.668 85.3262   4
   0  -3 -19 38.4443 32.3736   3
   0   3 -19 231.466 87.5502   3
   0   3  19 75.3573 62.1755   4
   0   3 -20 1106.61 181.115   3
   0  -3 -20 1261.23 194.873   3
   0  -3  20 1093.66 194.266   4
   0   3  20 920.195 179.120   4
   0  -3 -21 881.199 172.926   3
   0   3 -21 826.951 163.645   3
   0   3  21 757.164 161.356   4
   0  -3  21 831.821 170.383   4
   0  -3  22 336.452 116.121   4
   0   3  22 392.891 121.401   4
   0  -3 -22 253.788 91.5625   3
   0   3 -22 268.224 101.132   3
   0  -3  23 88.2402 54.0396   4
   0   3 -23 101.955 72.2080   3
   0   3  23 191.023 100.240   4
   0  -3 -23 195.820 87.6887   3
   0  -3  24 272.011 107.293   4
   0   3  24 113.378 69.5212   4
   0  -3  25 236.389 107.808   4
   0   3  25 171.777 91.6507   4
   0   4   0 8555.89 287.607   1
   0  -4   0 8923.71 312.816   4
   0   4   1 36089.3 711.246   3
   0  -4   1 37196.2 730.644   4
   0  -4  -1 36460.6 730.952   4
   0   4  -1 34907.8 504.716   7
   0   4  -1 36937.7 710.681   1
   0   4   1 35327.5 679.697   1
   0   4  -2 10575.4 342.209   1
   0  -4   2 10922.9 339.846   2
   0   4   2 10247.2 329.614   3
   0  -4  -2 10741.0 355.265   4
   0   4  -3 523.385 74.8731   1
   0  -4  -3 608.906 82.3703   4
   0   4   3 693.190 82.7843   3
   0  -4   3 499.500 69.5533   2
   0   4  -4 4142.24 225.298   1
   0   4   4 3512.32 105.147   8
   0   4   4 3708.58 196.327   3
   0  -4   4 4295.27 216.912   2
   0  -4  -4 3684.09 210.122   4
   0  -4  -5 811.972 100.535   4
   0   4   5 952.878 101.692   3
   0  -4   5 616.008 85.7776   2
   0   4  -5 665.779 95.0346   1
   0  -4   6 7509.84 316.217   2
   0   4   6 6691.06 286.577   3
   0   4  -6 7312.72 332.556   1
   0  -4  -6 6391.09 298.726   4
   0  -4  -7 350.432 71.5688   4
   0   4   7 323.762 69.1556   4
   0  -4   7 713.908 102.225   2
   0   4  -7 649.715 101.578   1
   0   4   7 329.668 68.0422   3
   0  -4  -8 3598.61 236.778   4
   0   4  -8 3655.44 258.401   1
   0  -4   8 3567.81 237.111   2
   0   4   8 3533.50 217.705   3
   0  -4  -9 927.264 123.540   4
   0   4  -9 1806.09 186.127   1
   0  -4   9 1664.36 166.431   2
   0   4   9 994.636 121.590   3
   0   4  10 172.019 52.1565   3
   0   4 -10 349.752 85.9582   1
   0  -4  10 217.722 62.9404   2
   0  -4 -10 195.708 68.5020   4
   0  -4 -11 886.907 133.176   4
   0   4  11 850.735 127.671   4
   0   4 -11 1133.14 158.069   1
   0  -4  11 924.790 133.942   2
   0  -4 -11 873.659 95.2639   6
   0   4 -11 1120.57 144.334   2
   0  -4 -11 582.430 43.5648   8
   0   4  11 732.354 110.511   3
   0   4  12 424.676 87.7849   3
   0  -4 -12 477.371 98.5292   4
   0   4  12 505.004 102.227   4
   0  -4  12 695.583 120.803   2
   0  -4 -12 345.350 38.5176   8
   0  -4  12 699.719 106.825   6
   0  -4  12 705.182 132.571   1
   0  -4 -12 439.886 72.1555   6
   0   4 -12 790.647 125.297   2
   0  -4 -12 504.511 98.1178   3
   0   4 -12 699.770 130.222   1
   0  -4  13 378.357 100.551   1
   0  -4 -13 249.172 78.8379   3
   0  -4 -13 254.211 84.0950   4
   0  -4 -13 240.500 53.0522   6
   0   4  13 250.299 73.2624   3
   0   4  13 243.779 73.6620   4
   0   4 -13 552.221 120.730   1
   0  -4  13 411.493 86.4851   6
   0  -4  13 428.950 103.334   2
   0   4 -13 516.863 102.922   2
   0  -4 -14 35.1744 38.0218   4
   0  -4  14-36.8517 51.1726   1
   0   4  14 121.839 53.5917   4
   0   4 -14 16.2800 26.7194   3
   0  -4 -14 78.8124 34.8871   6
   0  -4 -14 86.6501 51.6846   3
   0  -4  14 47.3243 22.5731   6
   0   4  14 114.411 58.7069   2
   0   4 -14 43.0577 43.9025   2
   0   4 -15 8481.91 439.506   3
   0   4  15 8932.11 471.092   4
   0  -4 -15 9136.70 349.267   6
   0  -4  15 7102.93 231.327   5
   0   4 -15 7536.75 437.516   2
   0  -4 -15 9258.40 486.283   4
   0  -4  15 8273.15 402.133   6
   0  -4 -15 8767.92 462.694   3
   0  -4  15 7869.06 497.429   1
   0  -4 -16 466.568 115.444   3
   0  -4  16 590.698 111.627   6
   0  -4 -16 413.073 51.9725   5
   0   4 -16 519.366 118.281   2
   0   4 -16 432.380 103.705   3
   0  -4  16 564.750 134.139   1
   0  -4  16 352.965 42.1857   5
   0  -4 -16 408.780 73.3505   6
   0   4  16 251.376 84.3821   4
   0  -4 -16 394.740 99.6666   4
   0   4 -17 386.465 103.828   3
   0   4 -17 404.517 108.525   2
   0  -4 -17 492.924 83.9775   6
   0   4  17 432.765 117.819   4
   0  -4 -17 300.747 37.1490   5
   0  -4 -17 511.162 122.185   3
   0  -4 -18 5079.02 276.787   6
   0   4 -18 4964.09 381.436   2
   0   4 -18 5113.90 371.832   3
   0   4  18 4559.32 373.879   4
   0  -4 -18 5168.04 384.616   3
   0   4  19 1559.34 222.964   4
   0  -4  19 2332.20 282.840   4
   0  -4 -19 1880.28 249.555   3
   0  -4 -19 1643.25 161.387   6
   0   4 -19 2411.92 263.035   3
   0   4 -19 2346.24 273.079   2
   0   4 -20 206.131 80.6264   3
   0  -4 -20 241.586 67.5028   6
   0  -4  20 314.737 107.559   4
   0  -4 -20 238.977 92.3499   3
   0   4  20 323.592 107.972   4
   0   4  21 1548.39 229.584   4
   0   4 -21 1183.90 197.669   3
   0  -4 -21 1501.68 225.773   3
   0  -4  21 1298.51 228.398   4
   0   4  22-4.38902 55.6953   4
   0  -4  22 129.583 77.6290   4
   0  -4 -22 58.6506 53.4146   3
   0   4 -22 63.9732 52.4364   3
   0   4 -23 532.749 140.002   3
   0  -4  23 289.841 114.410   4
   0   4  23 405.678 127.740   4
   0   4  24-25.7096 42.1729   4
   0  -4  24 4.45547 52.2500   4
   0  -4  25 75.9635 69.5795   4
   0   4  25 57.1416 49.1931   4
   0   5   0 725.709 91.1516   1
   0   5   0 743.393 93.7584   2
   0  -5   0 842.283 105.219   4
   0   5   0 878.593 63.2580   7
   0   5  -1 1843.63 143.614   1
   0  -5   1 1823.61 152.580   4
   0   5  -1 1880.01 145.055   2
   0  -5  -1 1428.38 136.724   4
   0   5  -1 1875.94 79.3035   7
   0   5   1 1263.02 124.520   3
   0   5   1 1273.78 116.624   1
   0  -5   2 7975.57 311.958   2
   0  -5   2 8119.81 329.869   4
   0   5  -2 8111.55 319.886   1
   0   5  -2 8286.40 317.136   2
   0  -5  -2 6734.96 307.794   4
   0   5   2 6797.90 295.139   3
   0   5  -3 7844.71 316.881   2
   0  -5  -3 7918.08 335.861   4
   0   5   3 7463.08 309.080   3
   0   5  -3 7749.49 325.217   1
   0  -5   3 8238.32 323.547   2
   0   5   4 7363.49 196.320   8
   0   5  -4 7689.01 319.784   2
   0   5   4 7301.91 310.701   3
   0   5  -4 7561.79 331.607   1
   0  -5  -4 7277.32 327.670   4
   0  -5   4 7807.42 321.291   2
   0   5   5 3356.69 208.147   3
   0   5  -5 3580.11 232.575   1
   0   5   5 2878.47 97.3648   8
   0  -5   5 3614.93 221.875   2
   0  -5  -5 3372.79 222.696   4
   0   5  -6 2690.85 209.883   1
   0  -5  -6 2684.05 206.486   4
   0  -5   6 2647.16 195.872   2
   0   5   6 3330.49 210.863   3
   0   5  -7 196.129 61.9505   1
   0  -5   7 143.473 52.2754   2
   0  -5  -7 177.133 60.6733   4
   0   5   7 146.279 51.2138   3
   0   5  -8 8588.40 415.012   1
   0   5   8 10121.9 396.267   3
   0  -5   8 8978.43 402.276   2
   0  -5  -8 9975.51 426.436   4
   0   5  -9 3510.79 248.495   2
   0  -5   9 3834.94 267.063   2
   0   5  -9 3871.81 284.682   1
   0   5   9 4382.55 282.884   4
   0  -5  -9 4539.10 289.912   4
   0   5   9 4506.67 268.958   3
   0  -5  10 2259.63 225.765   1
   0  -5  10 2213.14 209.403   2
   0   5  10 2448.06 218.264   4
   0   5 -10 2185.14 201.586   2
   0   5  10 2104.99 188.145   3
   0   5 -10 2108.71 221.076   1
   0  -5 -10 2175.58 204.460   4
   0   5 -11 17212.6 610.821   2
   0   5  11 19171.1 648.333   4
   0  -5 -11 18720.4 648.833   4
   0  -5 -11 19040.1 636.228   3
   0   5 -11 18261.1 687.549   1
   0  -5  11 16815.7 627.729   2
   0  -5  11 16705.0 669.694   1
   0   5  11 19307.1 616.191   3
   0  -5  12 493.305 102.862   2
   0   5  12 503.445 104.518   4
   0   5 -12 561.226 108.648   2
   0  -5 -12 388.306 92.1491   3
   0  -5  12 645.285 130.122   1
   0   5 -12 591.498 124.590   1
   0  -5 -12 407.336 97.1208   4
   0   5  12 479.765 96.9664   3
   0   5  13 96.3789 52.6410   4
   0  -5 -13 155.591 49.0335   6
   0   5 -13 67.5556 53.0797   2
   0  -5  13 148.321 71.3752   1
   0  -5 -13 150.865 64.0528   3
   0  -5  13 5.65787 43.1116   2
   0  -5  13 72.2312 38.8774   6
   0  -5 -13 143.722 60.5021   4
   0  -5  14 709.048 117.756   6
   0  -5 -14 647.178 93.2699   6
   0   5  14 545.254 122.992   4
   0   5 -14 664.456 139.028   2
   0  -5  14 697.698 143.087   1
   0  -5 -14 498.766 112.396   4
   0  -5 -14 783.950 138.451   3
   0  -5  15 10914.7 489.065   6
   0  -5 -15 11299.2 545.070   3
   0  -5  15 11006.9 600.937   1
   0   5  15 10851.3 535.349   4
   0   5 -15 11031.5 541.515   2
   0  -5 -15 10841.1 400.334   6
   0   5  16 2597.11 268.272   4
   0  -5 -16 3290.63 295.021   3
   0   5 -16 2878.31 285.629   2
   0   5 -16 3139.06 281.468   3
   0  -5  16 3224.19 330.690   1
   0  -5 -16 2866.71 201.560   6
   0  -5  17 1438.20 105.041   5
   0   5 -17 1791.52 220.378   3
   0   5  17 2010.09 239.506   4
   0  -5  17 1513.63 239.642   1
   0   5 -17 1827.47 233.343   2
   0  -5 -17 1857.78 233.798   3
   0  -5 -17 1558.64 119.404   5
   0  -5 -17 2074.28 173.792   6
   0  -5 -18 42.3024 61.7322   3
   0  -5 -18-11.0828 30.7229   6
   0   5 -18-27.3038 47.3659   3
   0  -5  18 43.8246 13.2418   5
   0   5  18 58.9407 56.1739   4
   0   5 -18 52.5828 46.9555   2
   0  -5 -18 11.7812 12.9587   5
   0  -5 -19 687.335 105.186   6
   0   5  19 590.073 136.000   4
   0  -5 -19 789.790 166.094   3
   0   5 -19 669.020 132.323   3
   0   5 -19 671.595 145.254   2
   0   5 -20 29.7205 68.4648   2
   0  -5 -20-12.1438 28.0520   6
   0  -5  20-6.61939 39.0682   4
   0   5 -20 32.9519 52.3776   3
   0   5  20 106.683 66.3039   4
   0  -5 -20 30.4882 54.8795   3
   0  -5 -21 108.398 74.6186   3
   0   5 -21 53.5459 54.8269   3
   0   5  21 145.531 77.4586   4
   0  -5  21 86.6296 78.3137   4
   0   5  22 369.847 125.865   4
   0  -5  22 84.8973 77.7614   4
   0   5 -22 289.274 110.011   3
   0  -5 -22 165.943 83.6326   3
   0  -5  23 207.006 93.7763   4
   0   5  23 267.897 110.776   4
   0  -5  24 72.3813 67.1770   4
   0   5  24 3.00466 57.8929   4
   0   6   0 4419.76 158.540   7
   0   6   0 4077.84 236.129   1
   0  -6   0 4375.72 265.687   4
   0   6   0 4385.67 247.773   2
   0   6  -1 13253.5 269.371   7
   0   6   1 12184.3 417.249   1
   0  -6  -1 12551.5 464.719   4
   0   6   1 11766.0 435.362   3
   0   6   1 11812.3 420.373   2
   0  -6   1 13702.8 479.176   4
   0   6  -1 13998.3 453.424   1
   0   6  -1 13982.6 451.849   2
   0   6  -2 38541.2 824.467   1
   0   6   2 36740.4 809.787   3
   0  -6   2 38102.5 853.102   4
   0  -6  -2 36859.9 852.289   4
   0   6  -2 37951.3 812.789   2
   0  -6  -3 5606.91 306.979   4
   0  -6   3 6154.50 303.521   2
   0   6  -3 6144.89 307.558   1
   0   6   3 5657.80 289.323   3
   0  -6   3 6060.85 312.602   4
   0  -6  -4 875.099 121.677   4
   0   6   4 898.170 75.1330   8
   0   6  -4 1091.07 130.058   1
   0  -6   4 1020.76 123.144   2
   0   6   4 910.169 116.490   3
   0  -6   5 5652.96 301.402   2
   0   6  -5 5762.60 316.277   1
   0   6   5 5464.58 170.014   8
   0   6   5 5935.32 303.593   3
   0  -6  -5 5936.42 324.443   4
   0  -6   6 5730.57 307.476   2
   0  -6  -6 5136.02 304.821   4
   0   6   6 5092.79 284.645   3
   0   6   6 5518.82 313.037   4
   0   6  -6 5773.06 324.717   1
   0   6  -7 3235.13 235.733   2
   0  -6  -7 3004.07 238.586   4
   0  -6   7 3056.64 231.312   2
   0   6  -7 3464.18 259.152   1
   0   6   7 3046.00 238.301   4
   0   6   7 2889.22 214.453   3
   0   6   8 919.141 125.970   3
   0   6   8 1146.83 148.008   4
   0  -6   8 628.882 110.195   2
   0   6  -8 771.765 120.115   2
   0  -6  -8 976.196 139.634   4
   0   6  -8 646.754 114.866   1
   0   6  -9 901.526 143.387   1
   0   6  -9 797.872 125.056   2
   0  -6   9 873.457 143.022   1
   0  -6   9 874.339 135.422   2
   0  -6  -9 605.377 111.899   3
   0   6   9 611.298 113.991   4
   0   6   9 611.851 103.835   3
   0  -6  -9 715.842 124.040   4
   0   6  10 804.276 121.553   3
   0  -6  10 465.528 106.628   1
   0  -6 -10 625.282 118.076   4
   0   6  10 708.692 122.757   4
   0   6 -10 657.752 126.746   1
   0  -6  10 540.401 108.520   2
   0  -6 -10 743.476 123.764   3
   0   6 -10 451.152 97.6640   2
   0   6 -11 4713.86 319.588   2
   0  -6  11 4879.07 358.979   1
   0   6  11 4463.41 297.914   3
   0  -6 -11 4302.40 315.558   4
   0  -6 -11 4600.60 319.418   3
   0  -6  11 5208.32 346.954   2
   0   6  11 4097.34 303.640   4
   0   6 -11 5019.19 360.467   1
   0  -6 -12 2599.21 245.954   3
   0  -6  12 3660.05 320.059   1
   0   6  12 2556.09 244.855   4
   0  -6 -12 2393.62 244.477   4
   0  -6  12 3574.31 294.432   2
   0   6 -12 3386.44 275.423   2
   0  -6  13 2981.10 297.685   1
   0  -6 -13 1983.48 222.706   3
   0  -6 -13 2279.73 241.716   4
   0   6 -13 3071.23 273.030   2
   0   6  13 2240.36 236.948   4
   0   6 -14 4282.38 334.972   2
   0  -6  14 4376.18 371.996   1
   0  -6 -14 3818.33 237.381   6
   0  -6 -14 4214.17 332.565   3
   0   6  14 4074.20 328.818   4
   0  -6  15 18333.8 808.366   1
   0   6  15 15397.3 671.563   4
   0  -6 -15 17444.7 702.388   3
   0  -6 -15 16071.9 522.534   6
   0   6 -15 18050.6 719.782   2
   0   6  16 886.088 161.455   4
   0   6 -16 1054.15 184.010   2
   0  -6 -16 771.757 108.758   6
   0  -6  16 1084.69 199.597   1
   0  -6 -16 937.806 165.127   3
   0  -6 -17 58.5146 37.0736   6
   0  -6 -17 106.743 46.8583   3
   0   6 -17 35.6400 39.1124   3
   0   6 -17 113.736 67.3661   2
   0   6  17 13.6179 39.6398   4
   0  -6  17 33.0381 37.8934   1
   0   6 -18 20.0320 47.2598   3
   0   6 -18 147.107 75.1301   2
   0  -6 -18 164.659 54.1861   6
   0   6  18 174.610 84.0531   4
   0  -6  18 101.882 82.3381   1
   0  -6 -18 175.550 84.1932   3
   0  -6  19 131.269 94.4488   1
   0  -6 -19 129.132 49.4554   6
   0   6 -19 27.1206 50.9288   2
   0  -6 -19 148.286 79.2711   3
   0   6  19 157.559 84.0080   4
   0   6 -19 102.427 64.6712   3
   0   6  20 70.6076 68.7524   4
   0   6 -20 21.2890 43.5673   3
   0   6 -20 87.4589 67.6284   2
   0  -6 -20 105.120 56.1547   3
   0   6 -21 1024.33 189.572   3
   0   6 -21 1124.11 209.861   2
   0  -6 -21 993.505 195.490   3
   0   6  21 993.855 192.654   4
   0  -6  22-16.7958 60.8060   4
   0   6  22 146.577 86.2385   4
   0   6  23 1328.04 233.448   4
   0  -6  23 761.252 181.859   4
   0   6  24 241.290 123.342   4
   0  -7   0 781.819 125.396   4
   0   7   0 717.145 110.364   1
   0   7   0 762.168 71.1078   7
   0   7   1 1731.09 113.548   7
   0   7  -1 1546.87 85.4456   7
   0  -7  -1 1546.57 170.306   4
   0   7   1 1621.61 169.060   3
   0   7  -1 1745.97 165.710   1
   0  -7   1 1542.17 167.984   4
   0   7   1 1691.77 159.956   1
   0   7  -2 79.1060 37.8425   1
   0   7   2 14.9285 22.4169   3
   0  -7  -2 88.4830 48.1757   4
   0   7  -2 25.3220 9.62270   7
   0  -7   2 29.5002 32.5946   4
   0  -7   3 97.6428 49.7873   4
   0   7   3 136.091 50.2723   3
   0  -7  -3 92.1260 47.6711   4
   0   7  -3 159.171 57.5010   1
   0  -7   4 139.093 60.2419   2
   0   7   4 222.349 42.6949   8
   0  -7   4 169.649 69.1032   4
   0  -7  -4 167.546 54.8046   4
   0   7  -4 106.541 46.4292   1
   0   7   4 145.045 57.6656   3
   0   7   5 1190.28 150.872   4
   0  -7   5 1259.30 150.944   2
   0   7   5 1182.20 143.854   3
   0   7   5 1287.48 90.3335   8
   0  -7  -5 1168.15 153.734   4
   0   7  -5 1240.22 146.363   2
   0   7  -5 1409.93 163.899   1
   0   7   6 3180.53 253.389   4
   0  -7  -6 3243.49 258.633   4
   0   7   6 3251.24 240.173   3
   0   7  -6 3497.87 254.121   2
   0   7  -6 3354.32 261.773   1
   0  -7   6 3172.76 264.823   1
   0  -7   6 3245.06 246.586   2
   0  -7  -6 2927.39 225.398   1
   0   7   6 2997.28 119.204   8
   0   7  -7 5731.31 350.822   1
   0  -7   7 5637.89 334.181   2
   0   7   7 4821.82 300.608   3
   0  -7  -7 5120.91 323.222   3
   0   7   7 4772.30 318.687   4
   0  -7  -7 4733.03 295.470   1
   0   7  -7 5816.14 334.934   2
   0  -7  -7 5310.84 338.628   4
   0  -7   7 6069.14 379.123   1
   0  -7  -8 130.517 49.6277   1
   0   7  -8 201.989 73.9060   2
   0   7   8 152.737 65.2698   4
   0   7   8 130.007 50.7558   3
   0  -7  -8 84.0140 39.6043   3
   0   7  -8 219.205 68.6705   1
   0  -7   8 214.728 70.0048   2
   0  -7  -8 149.730 61.8659   4
   0  -7   8 285.086 91.5101   1
   0  -7   9 1886.48 203.684   2
   0  -7   9 2054.32 230.307   1
   0   7   9 1941.09 209.655   4
   0  -7  -9 1905.41 209.964   4
   0  -7  -9 1858.19 202.275   3
   0   7  -9 2529.54 246.167   1
   0   7  -9 2208.09 216.362   2
   0   7   9 1969.00 198.160   3
   0  -7 -10 783.668 134.914   3
   0   7 -10 743.821 133.159   2
   0  -7  10 476.965 44.6698   7
   0  -7 -10 717.835 131.585   4
   0   7 -10 685.532 131.658   1
   0   7  10 728.954 133.230   4
   0  -7  10 525.050 49.5206   7
   0  -7  10 750.001 133.044   2
   0  -7  10 603.310 130.266   1
   0  -7  11 573.857 125.709   2
   0  -7 -11 541.169 118.223   3
   0   7 -11 557.898 115.259   2
   0  -7  11 428.012 120.264   1
   0  -7  11 300.973 42.1700   7
   0   7  11 515.166 116.872   4
   0  -7 -11 457.276 114.010   4
   0  -7  12 5021.47 394.902   1
   0   7 -12 5363.35 363.184   2
   0   7  12 4593.88 345.832   4
   0  -7 -12 4729.62 348.945   3
   0  -7  13 9822.34 566.557   1
   0  -7 -13 8176.27 471.255   3
   0   7 -13 8891.20 482.877   2
   0   7  13 8353.74 478.774   4
   0   7 -14 201.616 84.1935   2
   0  -7  14 156.983 71.2025   1
   0  -7 -14 242.706 94.9818   3
   0   7  14 75.1239 53.2849   4
   0   7 -15 50.2649 59.3115   2
   0   7  15 125.487 71.5261   4
   0  -7 -15 59.4630 31.0717   6
   0  -7  15 41.7617 46.1013   1
   0  -7 -15-10.0836 39.8896   3
   0   7 -16 1028.43 174.584   2
   0  -7  16 1057.50 202.484   1
   0   7  16 1089.22 183.852   4
   0  -7 -16 1258.41 198.469   3
   0  -7 -16 1133.57 137.652   6
   0  -7 -17 167.986 78.4717   3
   0   7  17 202.491 83.2265   4
   0   7 -17 127.254 61.7522   2
   0  -7 -17 168.178 56.3785   6
   0  -7  17 135.033 80.5443   1
   0   7 -18 345.759 108.996   3
   0   7 -18 333.467 107.757   2
   0  -7  18 411.073 136.729   1
   0   7  18 434.987 123.076   4
   0  -7 -18 392.670 79.0705   6
   0  -7 -18 433.175 118.336   3
   0  -7 -19 425.972 130.039   3
   0  -7 -19 364.853 81.0617   6
   0   7 -19 516.616 131.616   3
   0   7  19 284.273 94.1736   4
   0  -7  19 507.833 145.696   1
   0   7 -19 551.848 138.242   2
   0  -7  19 302.573 78.8411   7
   0  -7 -20 132.679 84.4319   3
   0   7  20 148.202 88.3760   4
   0   7 -20 185.753 87.3332   3
   0   7 -20 188.029 91.3410   2
   0  -7  20 267.530 127.067   1
   0   7  21 908.807 190.369   4
   0   7 -21 808.823 173.876   3
   0   7 -21 818.603 186.478   2
   0   7  22 131.577 82.2460   4
   0   7  23 37.1880 57.4881   4
   0  -8   0 3651.56 273.742   1
   0   8   0 3702.09 257.236   1
   0   8   0 3804.20 272.817   3
   0  -8   0 3707.42 283.478   4
   0   8   0 3610.27 159.296   7
   0   8   0 3685.32 258.506   2
   0   8   1 1587.35 171.187   2
   0  -8   1 1737.51 190.891   4
   0  -8  -1 1583.80 186.884   4
   0   8  -1 1845.77 181.117   2
   0   8   1 1692.13 183.333   3
   0  -8   1 1798.42 195.607   1
   0   8   1 1734.57 119.374   7
   0   8  -1 1835.79 180.629   1
   0   8   1 1627.39 167.025   1
   0  -8  -1 1523.89 173.389   1
   0   8  -1 1687.33 93.6407   7
   0  -8   2 3471.65 271.032   4
   0   8  -2 3248.83 244.783   2
   0   8   2 3912.34 197.031   7
   0  -8  -2 3865.96 289.827   4
   0   8   2 3830.50 267.149   2
   0   8  -2 3394.49 250.236   1
   0  -8  -2 3436.50 260.809   1
   0  -8   2 3303.48 267.682   1
   0   8   2 3546.05 263.167   3
   0  -8  -3 6766.57 390.662   4
   0  -8  -3 6525.93 365.975   1
   0   8  -3 6727.48 362.253   2
   0   8   3 6780.41 383.667   4
   0  -8   3 6930.21 394.109   1
   0   8   3 6666.34 366.991   3
   0  -8   3 6430.01 376.919   4
   0   8  -3 6812.95 365.287   1
   0   8   4 2741.31 164.412   8
   0   8   4 2517.33 232.523   4
   0  -8   4 2802.70 245.744   4
   0  -8  -4 2608.84 243.548   4
   0   8  -4 2780.02 231.264   2
   0  -8  -4 2654.81 227.532   1
   0   8  -4 2910.08 240.527   1
   0   8   4 2848.89 235.064   3
   0  -8   4 2710.27 251.338   1
   0  -8   5 220.492 80.4649   4
   0  -8   5 61.4806 33.8229   1
   0  -8  -5 113.532 51.4590   1
   0  -8  -5 236.809 77.5010   4
   0   8  -5 171.778 62.9009   2
   0   8   5 268.896 74.6526   3
   0   8  -5 162.479 63.9108   1
   0   8   5 216.127 42.0854   8
   0  -8   5 244.935 71.8666   2
   0   8   5 196.880 73.5710   4
   0   8  -6 1133.85 151.288   2
   0   8   6 1383.60 178.602   4
   0  -8  -6 1261.87 159.451   1
   0   8  -6 1062.25 153.145   1
   0  -8   6 1186.53 173.353   1
   0   8   6 1377.63 166.099   3
   0  -8  -6 1359.47 180.511   4
   0   8   6 1253.18 87.4497   8
   0  -8   6 1094.20 151.256   2
   0   8  -7 1833.15 199.363   2
   0  -8   7 1802.90 199.883   2
   0   8   7 1594.77 179.886   3
   0  -8  -7 1821.95 194.437   1
   0   8  -7 1853.17 207.029   1
   0  -8   7 1919.22 223.347   1
   0   8   7 1810.58 204.859   4
   0  -8  -7 1600.05 196.250   4
   0   8  -8 51.5654 42.0847   2
   0  -8  -8 121.663 59.8322   3
   0  -8   8 101.158 57.6295   1
   0  -8   8 54.7379 37.6879   2
   0  -8  -8 122.816 65.6595   4
   0   8   8 59.5062 42.3119   4
   0  -8  -8 97.4864 50.1079   1
   0   8  -8 15.8707 28.9239   1
   0  -8  -9 657.402 129.281   3
   0  -8   9 854.179 142.882   2
   0   8   9 562.520 122.450   4
   0  -8   9 659.739 140.135   1
   0  -8  -9 752.052 141.535   4
   0  -8  -9 724.586 129.124   1
   0   8  -9 845.618 140.879   2
   0  -8  10 1177.94 187.714   1
   0  -8 -10 1451.00 192.771   3
   0  -8 -10 1270.84 171.144   1
   0   8 -10 1248.29 174.764   2
   0   8  10 1288.35 186.268   4
   0   8 -11 693.212 134.534   2
   0  -8 -11 672.482 132.471   3
   0  -8  11 833.359 164.733   1
   0   8  11 914.944 167.931   4
   0  -8  12 374.116 114.561   1
   0  -8 -12 145.520 66.8961   3
   0   8  12 294.917 93.3222   4
   0  -8  12 147.643 22.9440   7
   0   8 -12 182.043 65.9490   2
   0  -8  13 1124.32 201.130   1
   0   8  13 990.264 170.617   4
   0  -8  13 734.191 64.5888   7
   0  -8 -13 1172.77 187.711   3
   0   8 -13 1252.80 187.825   2
   0  -8  13 888.202 74.5003   7
   0   8 -14 277.001 95.2951   2
   0   8  14 316.316 100.063   4
   0  -8  14 220.616 100.587   1
   0  -8 -14 264.047 93.0827   3
   0  -8  14 185.462 39.0262   7
   0  -8  15 160.766 39.2505   7
   0  -8  15 347.164 116.357   1
   0   8 -15 267.161 91.0836   2
   0  -8 -15 152.025 71.3585   3
   0   8  15 88.2926 54.7752   4
   0   8  16 451.977 127.283   4
   0  -8 -16 555.080 143.134   3
   0   8 -16 281.347 93.7857   2
   0  -8 -16 406.708 87.4390   6
   0  -8  16 255.015 54.6615   7
   0  -8  16 332.398 124.703   1
   0   8 -17 966.487 177.398   2
   0   8  17 998.381 189.431   4
   0  -8 -17 869.083 179.606   3
   0  -8  17 951.664 200.325   1
   0  -8 -17 911.780 130.028   6
   0  -8  18 308.002 124.462   1
   0   8 -18 141.515 78.5897   2
   0   8  18 65.6401 65.3161   4
   0  -8 -18 153.895 53.2305   6
   0  -8 -18 222.504 96.2825   3
   0   8  19-12.5277 63.7704   4
   0  -8 -19-40.3424 49.9872   3
   0   8 -19-28.0309 53.8193   2
   0   8 -19 90.6513 60.7718   3
   0  -8  19 94.5991 92.7031   1
   0   8  20 302.268 117.001   4
   0   8 -20 367.829 130.117   2
   0  -8  20 252.930 127.295   1
   0   8 -20 263.653 96.3883   3
   0   8  21 66.3327 67.6674   4
   0   8  22 379.224 130.504   4
   0   9   0 71.4064 40.0408   2
   0   9   0 140.681 64.9927   3
   0   9   0 88.2011 26.9754   7
   0  -9   0 72.1662 56.3929   1
   0  -9   0 143.382 73.2626   4
   0   9   0 135.114 50.9920   1
   0   9   1 825.439 131.971   2
   0  -9  -1 823.750 137.489   1
   0  -9   1 890.650 147.922   1
   0   9   1 880.847 139.963   3
   0   9  -1 729.382 64.1296   7
   0   9  -1 905.943 135.590   1
   0   9   1 888.822 88.2738   7
   0   9  -1 832.091 130.491   2
   0  -9   1 950.704 155.376   4
   0  -9  -1 949.814 155.928   4
   0  -9   2 840.516 146.025   1
   0   9  -2 1058.75 146.398   1
   0   9   2 630.908 113.277   2
   0  -9   2 889.005 146.763   4
   0   9   2 662.769 122.638   3
   0   9   2 763.061 91.0025   7
   0  -9  -2 758.221 136.817   4
   0   9  -2 758.986 125.080   2
   0  -9  -2 728.019 133.612   1
   0   9  -2 534.152 37.6094   7
   0  -9  -3 2855.81 257.246   1
   0   9  -3 2694.55 240.658   1
   0   9  -3 3080.09 260.126   2
   0   9   3 3005.95 196.854   7
   0   9   3 2626.74 240.839   3
   0  -9  -3 2736.52 263.387   4
   0  -9   3 2979.92 280.317   1
   0   9   3 3053.63 257.969   2
   0  -9   3 2814.60 265.588   4
   0   9  -4 220.582 75.9868   1
   0  -9  -4 200.490 73.9324   1
   0   9   4 182.967 48.7562   8
   0   9   4 252.452 85.6473   4
   0  -9   4 84.7355 59.5733   4
   0  -9  -4 121.664 51.3436   4
   0   9  -4 130.662 62.0448   2
   0  -9   4 119.559 58.2225   1
   0   9   4 181.713 55.7440   7
   0   9   5 1264.66 111.370   8
   0  -9   5 1241.38 184.006   1
   0  -9  -5 1058.73 156.829   1
   0   9   5 1167.44 170.525   4
   0   9  -5 1045.42 153.497   2
   0  -9  -6 442.424 104.451   1
   0  -9   6 437.288 103.459   2
   0   9  -6 461.220 106.263   2
   0   9   6 469.015 114.830   4
   0   9   6 520.847 63.7455   8
   0  -9   6 400.758 99.9722   1
   0   9  -7 398.396 106.118   2
   0  -9   7 467.508 109.415   2
   0  -9  -7 406.159 98.1784   1
   0  -9   7 250.970 78.2771   1
   0   9   7 383.184 101.875   4
   0   9   7 339.351 42.1674   8
   0   9  -8 2138.03 229.689   2
   0   9   8 2165.97 241.876   4
   0  -9  -8 1786.73 211.556   1
   0  -9   8 1974.31 246.888   1
   0  -9   9 712.046 157.875   1
   0  -9  -9 833.652 146.475   1
   0   9   9 909.102 160.791   4
   0   9  -9 902.431 154.321   2
   0  -9 -10 213.507 75.6285   1
   0   9 -10 204.422 75.2102   2
   0   9  10 245.757 78.5087   4
   0  -9 -10 324.260 97.0837   3
   0  -9  10 267.855 88.6348   1
   0  -9 -11 765.355 153.311   3
   0  -9  11 646.116 147.295   1
   0  -9 -11 756.954 147.486   1
   0   9 -11 644.375 134.937   2
   0   9  11 578.892 129.453   4
   0  -9 -12 772.040 151.162   1
   0   9  12 680.832 149.808   4
   0  -9  12 779.439 174.163   1
   0   9 -12 826.334 158.743   2
   0  -9 -12 927.558 173.170   3
   0  -9 -13 519.720 131.827   3
   0   9 -13 596.820 134.035   2
   0   9  13 364.861 113.499   4
   0  -9  13 663.441 153.311   1
   0  -9 -13 562.283 131.068   1
   0   9  14 1327.29 208.256   4
   0   9 -14 1230.13 197.477   2
   0  -9  14 1274.35 227.761   1
   0  -9 -14 1398.35 215.976   3
   0  -9  15 610.456 160.136   1
   0   9 -15 535.642 136.253   2
   0   9  15 373.664 112.371   4
   0  -9 -15 487.509 135.968   3
   0   9 -16-3.06670 34.7669   2
   0  -9 -16 78.4057 58.5528   3
   0   9  16-41.5778 53.7831   4
   0  -9  16 63.5471 65.4679   1
   0  -9  17 36.4301 52.2358   1
   0  -9 -17 60.3390 62.1271   3
   0  -9 -17 32.7211 23.8003   6
   0   9  17-22.0203 63.2475   4
   0   9 -17 65.9313 75.4812   2
   0  -9 -18 89.4282 64.9799   3
   0   9 -18 121.087 75.7061   2
   0  -9  18 121.445 55.9249   1
   0   9  18 214.146 90.7059   4
   0   9 -19-44.7264 56.1526   2
   0   9  19-53.9012 80.6605   4
   0   9  20 859.490 184.575   4
   0  10   0 3440.75 164.734   7
   0 -10   0 3920.85 323.549   1
   0  10   0 3858.44 302.413   2
   0  10  -1 290.581 40.8872   7
   0 -10   1 304.196 90.0597   1
   0  10   1 397.386 61.0569   7
   0 -10  -1 387.458 101.499   1
   0  10   1 341.339 92.3878   2
   0  10  -1 264.125 80.2094   2
   0  10   2-15.6048 22.5051   7
   0  10   2-44.2792 32.3902   2
   0 -10   2 70.6214 42.7409   1
   0 -10  -2-66.5426 59.0145   1
   0  10  -2 58.3867 48.5886   2
   0  10   3 388.891 96.2204   2
   0  10  -3 554.126 134.084   2
   0 -10   3 547.158 130.051   1
   0 -10  -3 438.045 103.867   1
   0  10   3 412.762 74.2704   7
   0  10   4-20.1420 37.8483   2
   0 -10  -4 10.5905 34.4244   1
   0 -10   4 71.6134 49.0168   1
   0  10  -4 18.7064 44.3749   2
   0  10   4 41.8976 31.3912   7
   0  10   4 34.4043 31.7249   8
   0 -10  -5 3004.24 280.832   1
   0  10   5 3097.88 189.658   8
   0  10  -5 2773.24 266.035   2
   0 -10   5 2665.52 285.630   1
   0  10   5 3160.25 225.369   7
   0 -10  -6 667.319 132.974   1
   0  10   6 643.144 76.3256   8
   0 -10   6 349.186 104.025   1
   0  10   6 798.576 157.989   4
   0  10   6 767.902 120.579   7
   0  10  -6 480.688 116.710   2
   0 -10   7 1190.59 200.720   1
   0  10   7 1179.43 85.7036   8
   0  10  -7 1337.20 186.531   2
   0  10   7 1447.29 210.208   4
   0 -10  -7 1319.61 188.672   1
   0  10  -8 2202.12 245.686   2
   0  10   8 2892.28 292.544   4
   0 -10  -8 2848.62 279.625   1
   0 -10   8 2228.11 274.697   1
   0  10   9 1018.80 180.172   4
   0 -10   9 647.398 152.765   1
   0  10  -9 762.233 147.622   2
   0 -10  -9 1208.62 182.633   1
   0  10  10 336.668 108.807   4
   0 -10  10 460.803 135.968   1
   0  10 -10 614.179 138.249   2
   0 -10 -10 273.365 85.5051   1
   0 -10 -11 419.570 113.518   1
   0  10 -11 294.377 92.1584   2
   0  10  11 384.995 115.522   4
   0 -10  11 332.372 109.306   1
   0  10 -12 162.811 74.6848   2
   0 -10 -12 252.593 91.2934   1
   0  10  12 300.774 104.277   4
   0 -10  12 151.838 87.7751   1
   0 -10 -12 227.818 92.3215   3
   0 -10 -13 1562.29 241.154   3
   0  10 -13 1660.32 231.590   2
   0  10  13 1410.67 220.747   4
   0 -10  13 1868.46 276.701   1
   0 -10 -13 1394.52 214.933   1
   0 -10 -14 89.6956 72.5614   3
   0 -10 -14 51.8437 45.8915   1
   0  10  14 131.117 91.1009   4
   0 -10  14 154.718 91.1934   1
   0  10 -14 207.550 84.2756   2
   0  10  15 1148.76 208.908   4
   0 -10  15 1450.63 255.730   1
   0 -10 -15 1582.41 242.238   3
   0  10 -15 1534.27 236.006   2
   0 -10 -15 1382.20 220.932   1
   0 -10 -16 33.9080 34.6534   1
   0  10 -16 223.582 99.6274   2
   0 -10 -16 135.014 84.8453   3
   0 -10  16 162.256 93.2862   1
   0  10  16 73.2433 80.1413   4
   0  10  17 361.803 128.464   4
   0 -10 -17 157.596 90.0763   1
   0 -10  17 378.313 150.057   1
   0  10 -17 258.639 101.408   2
   0 -10 -17 179.207 92.6886   3
   0  10 -18 643.561 162.894   2
   0  10  18 859.947 188.403   4
   0  10  19-40.7036 57.1013   4
   0  11   0 27.1057 20.1112   7
   0  11   0 60.9611 38.0327   2
   0 -11   0-13.6496 42.7943   1
   0  11  -1 117.942 23.9123   7
   0  11  -1 164.738 69.5663   2
   0 -11  -1 49.5888 52.1424   1
   0  11   1 96.2852 44.3785   2
   0  11   1 107.738 38.3103   7
   0 -11   1 120.689 57.3943   1
   0  11   2 583.058 80.6811   7
   0  11  -2 925.075 156.883   2
   0 -11  -2 842.138 160.092   1
   0  11   2 622.127 127.260   2
   0 -11   2 921.174 171.584   1
   0  11   3 107.610 54.2795   8
   0  11   3 59.8123 37.5566   7
   0  11  -3 195.943 82.7513   2
   0 -11   3 142.008 80.0343   1
   0 -11  -3 67.3754 62.8664   1
   0  11   3 71.3530 44.5100   2
   0  11   4 1377.48 147.380   7
   0 -11  -4 1374.97 224.396   1
   0  11  -4 2320.23 263.999   2
   0 -11   4 1929.44 271.007   1
   0  11   4 1597.77 157.176   8
   0  11   4 1573.88 214.207   2
   0  11   5 863.958 122.768   7
   0  11   5 716.782 95.8847   8
   0 -11  -5 740.005 152.225   1
   0  11   5 601.650 130.767   2
   0 -11   5 591.761 142.344   1
   0  11  -5 916.256 157.045   2
   0  11   6 1546.68 128.304   8
   0  11   6 1625.29 181.188   7
   0 -11   6 1044.15 192.886   1
   0  11  -6 1413.55 200.351   2
   0 -11  -6 1597.47 220.075   1
   0 -11   7 4821.70 423.247   1
   0  11  -7 5121.96 384.685   2
   0  11   7 5255.90 201.804   8
   0  11   7 5164.84 335.371   7
   0 -11  -7 5685.34 415.987   1
   0  11   7 5636.89 430.271   4
   0  11   8 1459.63 181.975   7
   0  11   8 1532.98 229.124   4
   0 -11   8 875.680 188.763   1
   0 -11  -8 1547.29 222.056   1
   0  11  -8 1082.20 182.827   2
   0  11  -9 2017.37 251.440   2
   0 -11  -9 2562.23 284.488   1
   0  11   9 2429.67 238.547   7
   0 -11   9 2040.68 285.247   1
   0  11   9 2732.82 308.506   4
   0 -11 -10 7873.27 505.515   1
   0 -11  10 6453.38 512.361   1
   0  11 -10 6296.05 455.263   2
   0  11  10 6932.84 499.771   4
   0  11 -11 2574.27 292.973   2
   0 -11  11 2484.11 323.475   1
   0  11  11 2932.29 323.634   4
   0 -11 -11 3134.49 324.908   1
   0  11 -12 414.350 128.120   2
   0 -11 -12 305.463 108.283   1
   0  11  12 322.380 116.108   4
   0 -11  12 358.694 128.697   1
   0 -11 -13 1975.87 261.456   1
   0  11 -13 1605.62 234.084   2
   0  11  13 2043.67 281.517   4
   0 -11  13 2091.16 308.953   1
   0 -11 -14 576.677 147.433   1
   0 -11  14 253.465 136.398   1
   0  11  14 266.924 107.315   4
   0  11 -14 400.163 125.263   2
   0 -11 -15 319.572 116.332   1
   0  11 -15 574.685 145.935   2
   0  11  15 376.789 137.077   4
   0 -11  15 612.554 182.680   1
   0 -11 -15 392.838 128.882   3
   0  11 -16 102.717 60.9856   2
   0  11  16-56.8238 74.3959   4
   0  11  17-82.7820 71.0931   4
   0 -12   0-26.2463 62.6040   1
   0  12   0 136.997 75.9843   2
   0  12   0 85.1441 27.0775   7
   0 -12  -1 551.046 136.733   1
   0  12   1 721.029 145.019   2
   0 -12   1 231.131 90.7285   1
   0  12  -1 290.214 87.4789   2
   0  12   1 448.722 66.2085   7
   0 -12  -2 2278.71 278.787   1
   0 -12   2 2788.26 312.728   1
   0  12   2 2211.74 163.147   7
   0  12   2 2551.66 228.775   8
   0  12   2 2417.68 265.912   2
   0  12  -2 2506.16 270.336   2
   0  12   3 849.661 132.136   8
   0 -12  -3 807.111 166.130   1
   0  12  -3 923.110 169.866   2
   0 -12   3 1186.75 206.001   1
   0  12   3 696.295 98.2263   7
   0  12   3 857.572 157.260   2
   0  12   4 229.176 64.7275   8
   0 -12  -4 227.013 96.5550   1
   0  12  -4 324.410 100.706   2
   0  12   4 151.828 54.2180   7
   0  12   4 328.642 102.502   2
   0 -12   4 385.644 118.787   1
   0  12   5 166.616 49.7348   8
   0 -12  -5 121.655 63.2061   1
   0  12   5 136.317 53.7892   7
   0  12   5 95.5857 54.5327   2
   0 -12   5 266.203 93.2162   1
   0  12  -5 189.741 76.9812   2
   0 -12   6 567.655 146.106   1
   0 -12  -6 676.388 162.844   1
   0  12   6 595.599 106.592   7
   0  12  -6 524.645 129.056   2
   0  12   6 695.156 153.686   2
   0  12   6 625.021 88.3669   8
   0  12  -7 40.2188 34.4789   2
   0  12   7 83.3348 50.4292   7
   0 -12   7-61.1201 60.1417   1
   0 -12  -7 57.0707 45.9860   1
   0 -12  -8 571.494 141.248   1
   0  12   8 808.876 138.292   7
   0  12  -8 1024.09 182.538   2
   0 -12   8 1033.40 201.567   1
   0  12   9 569.518 147.848   4
   0 -12  -9 432.372 125.426   1
   0 -12   9 617.374 158.603   1
   0  12   9 557.231 132.037   7
   0  12  -9 510.659 126.670   2
   0  12 -10-5.31198 38.0413   2
   0  12  10 62.1208 41.6222   7
   0 -12 -10-29.2774 49.1451   1
   0  12  10 104.776 76.2274   4
   0 -12  10 54.3091 56.4007   1
   0  12 -11 1225.90 211.816   2
   0  12  11 1101.88 172.711   7
   0  12  11 1440.84 238.731   4
   0 -12  11 1383.10 252.241   1
   0 -12 -11 1270.96 217.886   1
   0 -12  12 283.113 121.324   1
   0  12  12 393.681 119.665   7
   0  12  12 382.207 115.676   4
   0  12 -12 404.512 122.752   2
   0 -12 -12 422.826 130.313   1
   0  12 -13 1557.24 241.525   2
   0  12  13 1055.88 188.158   7
   0  12  13 1481.16 246.681   4
   0 -12  13 1359.06 262.736   1
   0 -12 -13 1015.72 200.726   1
   0  12  14 84.0825 80.3845   4
   0  12 -14 46.9260 64.7878   2
   0  12  14 1.93579 46.7695   7
   0  12 -15 122.165 82.7286   2
   0  12  15 107.562 76.5019   4
   0  12  15 75.4510 46.4071   7
   0  12  16 408.319 134.077   7
   0 -13   0 92.8519 71.2388   1
   0  13   0 65.5678 57.2267   2
   0  13  -1 17.1827 45.5341   2
   0 -13  -1 14.5296 39.6271   1
   0  13   1 11.2059 46.2328   2
   0  13   1-10.1894 39.7100   8
   0 -13   1-16.0734 52.1102   1
   0  13   2 400.051 111.009   2
   0 -13   2 294.442 104.239   1
   0  13   2 547.143 112.153   8
   0 -13  -2 410.950 126.220   1
   0  13  -2 312.421 93.0832   2
   0  13   3 411.997 101.027   8
   0  13  -3 358.907 117.609   2
   0 -13   3 418.699 128.895   1
   0  13   3 329.819 112.894   2
   0 -13  -3 509.032 141.125   1
   0  13   4 180.245 61.2314   8
   0 -13  -4 124.931 84.5317   1
   0  13   4 31.3252 46.3229   2
   0 -13   4 138.621 73.7946   1
   0  13  -4 186.090 79.3585   2
   0  13   4 92.6876 41.1943   7
   0  13   5-19.3655 25.0462   7
   0 -13  -5 49.3064 46.8922   1
   0 -13   5 24.1761 41.6726   1
   0  13  -5 21.4862 40.6028   2
   0  13   5 11.0841 34.0985   2
   0  13   6 65.2363 61.9994   2
   0 -13  -6 66.1269 62.4141   1
   0 -13   6-40.9644 62.0306   1
   0  13  -6 15.0478 51.2608   2
   0  13   6 44.0179 38.4328   7
   0  13   7 152.330 100.910   2
   0  13   7 90.5179 48.7438   7
   0  13  -7-92.2908 63.6628   2
   0 -13   7 51.9104 54.5935   1
   0 -13  -7 150.670 102.033   1
   0 -13   8 190.617 102.255   1
   0  13   8 223.554 72.1061   7
   0  13   8 354.978 113.352   2
   0  13  -8 196.206 89.2654   2
   0 -13  -8 294.979 92.8314   1
   0 -13   9 17.1127 41.9057   1
   0  13  -9 126.493 72.4679   2
   0 -13  -9 8.02689 53.8494   1
   0  13   9 58.2647 33.9035   7
   0  13 -10 453.817 129.186   2
   0 -13  10 393.697 139.793   1
   0 -13 -10 400.441 131.023   1
   0  13  10 352.426 103.696   7
   0 -13  11-27.7991 66.7058   1
   0  13 -11 74.1816 62.7283   2
   0  13  11-7.30384 46.0199   7
   0  13  11-52.4187 66.5530   4
   0  13  12 299.521 95.1772   7
   0  13  12 523.056 160.252   4
   0  13 -12 372.386 123.926   2
   0  13  13 2390.65 285.568   7
   0  13 -13 2864.27 338.789   2
   0  13  14 675.848 163.008   7
   0  13  15 165.045 99.2292   7
   0 -14   0 73.8879 54.7599   1
   0  14   0 104.872 64.4667   8
   0  14   0-51.8025 86.5924   2
   0 -14  -1 1144.86 219.918   1
   0  14   1 1225.57 175.621   8
   0  14   1 1265.68 208.254   2
   0  14  -1 826.109 167.997   2
   0 -14   1 715.871 171.584   1
   0  14   2 680.151 153.365   2
   0 -14   2 498.120 146.199   1
   0 -14  -2 688.777 168.599   1
   0  14  -2 732.028 165.274   2
   0  14   2 781.996 139.218   8
   0 -14  -3 49.8329 80.0592   1
   0  14  -3 102.425 38.9087   2
   0  14   3 90.9743 69.2697   2
   0 -14   3 99.0126 75.7533   1
   0  14  -4 119.694 66.4128   2
   0 -14   4 171.101 106.031   1
   0  14   4 242.534 98.4404   2
   0 -14  -4 340.675 125.080   1
   0  14  -5 460.109 128.603   2
   0  14   5 520.203 141.359   2
   0 -14  -5 629.662 167.086   1
   0 -14   5 572.176 167.140   1
   0  14   6 157.087 105.558   2
   0  14  -6-40.2710 50.9831   2
   0 -14   6 106.129 84.1224   1
   0 -14  -6-22.2302 70.2893   1
   0  14  -7 54.1774 53.2465   2
   0  14   7 177.334 106.868   2
   0 -14  -7 31.1932 56.5314   1
   0 -14   7 198.667 93.6591   1
   0  14   8 122.892 60.9518   2
   0  14  -8 5.28182 45.1718   2
   0  14   9 1079.40 210.003   2
   0  14  -9 740.378 163.376   2
   0  14 -10 1551.57 248.154   2
   0  14  10 1725.20 265.685   2
   0  14 -11 495.669 142.236   2
   0  15   0-66.5474 70.7965   2
   0  15  -1 260.859 102.143   2
   0  15  -1 220.764 91.2888   8
   0  15   1 148.254 76.2029   2
   0  15  -2 37.5807 66.9020   2
   0  15   2 53.4970 40.4009   2
   0  15  -3-28.5115 69.1917   2
   0  15   3 146.595 77.8770   2
   0  15  -4 817.886 177.518   2
   0  15   4 836.729 186.416   2
   0  15   5 35.1660 44.1907   2
   0  15  -5-2.24124 35.2494   2
   0  15  -6 153.693 83.1207   2
   0  15   6-5.90080 49.7513   2
   0  15  -7 71.9781 62.3886   2
   0  15   7 164.173 97.8384   2
   0  15   8-0.34252 71.9565   2
  -1   0  25 27.4496 57.0678   4
  -1   0  24 405.734 125.610   4
   1   0 -24 475.385 134.978   3
  -1   0  23-11.6469 60.5369   4
   1   0 -23-70.1356 69.4190   3
   1   0 -22 579.316 141.638   3
  -1   0  22 615.161 151.930   4
  -1   0  21-57.6992 75.3134   4
   1   0 -21-31.4312 49.0307   3
   1   0 -20 1721.96 217.194   3
  -1   0  20 1672.82 233.793   4
   1   0 -19 50.0027 41.9179   3
  -1   0  19-47.7997 42.5484   4
  -1   0  18 258.835 85.9988   4
   1   0 -18 392.696 101.506   3
   1   0 -17-8.26767 27.9410   3
  -1   0  17 49.4616 47.1782   4
   1   0 -16 2215.26 219.400   3
  -1   0  16 2356.49 244.874   4
  -1   0  16 2271.44 167.438   6
  -1   0  15 49.3276 45.6489   2
  -1   0  15 35.9603 27.9606   6
  -1   0  15-33.8340 38.7322   4
   1   0 -15 17.0209 40.4558   1
   1   0 -15 24.5922 31.4900   3
   1   0 -14 7705.63 439.396   1
  -1   0  14 8075.17 417.111   2
   1   0 -14 7475.65 367.578   3
  -1   0  14 7596.44 292.201   6
  -1   0  14 7436.16 409.183   4
  -1   0  13-46.8682 57.3393   4
  -1   0  13 23.2874 24.5814   6
   1   0 -13-5.51713 21.6471   3
   1   0 -13 3.61834 27.8606   1
  -1   0  13-22.1567 31.2747   2
  -1   0  12 8965.30 407.984   2
   1   0 -12 8939.92 366.834   3
  -1   0  12 8980.78 293.088   6
  -1   0  12 8676.83 414.730   4
   1   0 -12 8720.46 433.488   1
  -1   0  11 2.18033 14.7616   6
   1   0 -11-23.2457 22.4527   1
  -1   0  11-0.12470 20.5514   2
   1   0 -10 48710.7 1067.25   1
  -1   0  10 50413.4 1016.11   2
  -1   0  10 50273.4 816.477   6
   1   0  -9 70.7520 36.8815   1
  -1   0   9 61.6582 22.7493   6
  -1   0   9 24.6897 23.6584   2
  -1   0   8 4915.80 236.680   2
  -1   0   8 4678.79 160.859   6
  -1   0   8 4767.37 216.148   3
   1   0  -8 4489.61 249.062   1
  -1   0   7 11.2470 22.4550   3
   1   0  -7 4.33477 20.7310   1
  -1   0   7 23.7943 14.5900   6
  -1   0   7 14.8258 8.59399   5
  -1   0   7 0.96870 18.4572   2
   1   0  -6 872.097 93.8841   1
  -1   0   6 831.877 77.5577   3
  -1   0   6 864.260 54.6172   6
  -1   0   6 886.679 85.5183   2
  -1   0   6 801.893 48.2134   5
  -1   0   5 51.4301 14.6914   5
  -1   0   5 56.4596 21.8908   2
  -1   0   5 100.196 25.7481   3
   1   0  -5 51.6916 25.9903   1
   1   0  -5 46.9661 12.4791   5
  -1   0   5 65.6172 13.5722   6
   1   0  -4 160.263 36.5686   1
   1   0  -4 104.866 18.0570   5
  -1   0   4 141.544 26.4165   3
  -1   0   3 71.4478 16.1505   3
   1   0  -3 77.8022 20.6659   1
   1   0  -3 60.9837 16.2851   5
   1   0   2 18187.0 334.944   7
   1   0   3 16.2278 13.4326   2
   1   0   3 8.06412 10.5175   5
   1   0   3 24.6790 19.6356   7
  -1   0  -3 4.68379 9.23975   5
  -1   0  -3 9.26570 17.1011   6
   1   0   3 2.66879 11.3020   3
  -1   0  -4 2702.53 94.1004   5
   1   0   4 2871.69 96.6591   5
   1   0   4 2848.14 132.468   3
   1   0   4 2814.77 135.582   2
  -1   0  -4 2874.67 128.236   6
  -1   0  -5 33.1215 11.8260   5
   1   0   5 67.1110 29.0873   6
   1   0   5 50.6234 20.1952   4
  -1   0  -5 47.5244 21.2659   6
   1   0   5 38.8336 21.2428   3
   1   0   5 74.5450 30.8323   2
   1   0   6 18168.0 445.570   2
   1   0   6 17931.3 403.793   4
   1   0   6 17412.2 406.948   6
  -1   0  -6 17068.5 294.830   5
   1   0   6 17517.8 431.880   3
  -1   0  -6 17882.1 472.224   1
  -1   0  -6 17883.5 407.057   6
  -1   0  -7 0.19046 22.6061   1
  -1   0  -7 10.0812 8.79855   5
  -1   0  -7-9.35792 22.4337   6
   1   0   7 36.6026 22.9478   6
   1   0   7 56.3635 31.7229   2
   1   0   7-6.05010 25.5709   4
   1   0   8 3645.16 191.123   4
  -1   0  -8 3705.90 229.295   1
   1   0   8 3706.88 213.879   2
   1   0   8 3597.01 186.836   6
  -1   0  -8 3660.76 183.837   6
  -1   0  -9 16.8230 30.9271   6
   1   0   9-9.79919 27.2039   2
  -1   0  -9-19.1841 25.9571   1
   1   0   9 30.1199 22.9816   4
   1   0   9 40.5680 25.4727   6
   1   0  10 2956.24 213.525   2
   1   0  10 2832.27 191.450   4
  -1   0 -10 3118.38 184.458   6
  -1   0 -10 3029.74 231.473   1
   1   0  10 2902.72 181.793   6
   1   0  11-3.05068 19.5156   2
  -1   0 -11 28.6516 27.3929   6
  -1   0 -11-25.2161 32.8819   1
   1   0  11 31.0651 35.6973   4
   1   0  11 28.9027 25.6053   6
  -1   0 -12 43629.8 896.023   6
   1   0  12 44602.2 1030.17   2
  -1   0 -12 44826.3 1098.27   1
   1   0  12 43641.4 899.344   6
   1   0  13 43.8536 38.3162   2
   1   0  13 35.6878 30.8504   6
  -1   0 -13 41.1630 51.2976   1
  -1   0 -13 6.20730 29.7763   3
   1   0  14 13835.0 569.419   2
  -1   0 -14 13600.3 529.342   3
   1   0  14 13379.0 520.749   4
   1   0  14 13385.7 471.061   6
  -1   0 -14 14017.3 613.225   1
   1   0  15-3.52867 27.5346   4
  -1   0 -15 7.17605 24.3894   3
   1   0  16 5032.60 332.145   4
  -1   0 -16 4987.73 338.833   3
   1   0  17-54.5682 54.8059   4
  -1   0 -17 4.85621 34.2124   3
   1   0  18 18.5848 35.9065   4
  -1   0 -18 5.63512 36.5578   3
   1   0  19-0.86768 42.0273   4
  -1   0 -19-25.0827 47.4763   3
   1   0  20 505.051 114.754   4
  -1   0 -20 463.459 117.121   3
   1   0  21-19.0442 54.6356   4
  -1   0 -21 16.4642 31.6974   3
  -1   0 -22-30.2640 76.7113   3
   1   0  22-40.8390 65.6746   4
  -1   0 -23 12.3495 36.4183   3
   1   0  23 33.3903 53.9073   4
   1   0  24 44.9863 36.6430   4
   1   0  25-270.185 105.899   4
  -1   1  25-17.0032 45.4636   4
  -1  -1  25 94.1579 76.0939   4
   1  -1 -24 311.954 113.225   3
  -1   1  24 262.183 110.312   4
  -1  -1  24 495.683 149.839   4
   1   1 -24 413.539 124.212   3
  -1  -1  23 234.851 85.3133   4
  -1   1  23 408.367 126.189   4
   1   1 -23 442.955 121.708   3
   1  -1 -23 429.057 122.946   3
  -1  -1  22 232.698 91.2229   4
  -1   1  22 221.916 96.3213   4
   1   1 -22 74.8203 53.2777   3
   1  -1 -22 189.085 78.6603   3
   1  -1 -21-47.4950 55.5634   3
   1   1 -21 212.541 81.3440   3
  -1  -1  21 94.6712 71.9805   4
  -1   1  21 111.714 55.0050   4
   1  -1 -20 389.052 105.151   3
  -1   1  20 361.221 114.663   4
  -1  -1  20 593.917 141.232   4
  -1  -1  20 510.156 94.8033   6
   1   1 -20 399.410 104.442   3
   1  -1 -19 1169.40 174.244   3
   1   1 -19 957.228 158.347   3
  -1  -1  19 1060.23 185.308   4
  -1   1  19 1050.22 180.174   4
  -1  -1  19 1088.02 132.659   6
  -1  -1  18 32.4632 45.6162   4
   1   1 -18 80.0148 47.6591   3
  -1  -1  18 163.199 64.8248   6
   1  -1 -18 69.5356 43.2370   3
  -1   1  18 105.164 75.1934   4
   1  -1 -17 1370.57 177.936   3
  -1  -1  17 1094.39 173.123   4
  -1  -1  17 1337.80 139.835   6
  -1   1  17 1361.10 190.204   4
   1   1 -17 1472.15 180.283   3
   1  -1 -16 1090.02 154.861   3
  -1  -1  16 1009.89 116.735   6
   1   1 -16 907.454 138.314   3
  -1   1  16 1038.29 165.019   4
  -1  -1  16 1160.07 174.471   4
  -1   1  15 3381.06 288.783   4
   1  -1 -15 3335.02 254.080   3
   1  -1 -15 3693.50 316.048   1
   1   1 -15 3861.73 270.707   3
  -1  -1  15 3600.04 286.229   2
  -1   1  15 3531.68 284.880   2
  -1  -1  15 3610.01 214.260   6
   1   1 -15 3336.75 300.733   1
  -1  -1  15 3426.19 288.592   4
   1  -1 -14 69.0285 47.0621   1
  -1  -1  14 236.349 73.4398   4
  -1   1  14 118.864 54.0838   3
   1   1 -14 181.557 55.2724   3
  -1  -1  14 294.473 83.5248   2
  -1   1  14 66.9570 42.0986   4
   1   1 -14 236.940 73.6695   1
   1  -1 -14 131.731 61.6275   3
  -1   1  14 77.3828 46.0423   2
  -1  -1  14 332.110 63.3426   6
  -1  -1  13 3734.33 270.662   2
  -1   1  13 3650.51 271.660   4
  -1   1  13 4047.22 278.410   2
   1   1 -13 3335.67 277.637   1
   1   1 -13 3228.79 230.541   3
   1  -1 -13 3654.59 290.923   1
  -1  -1  13 3649.31 275.215   4
  -1   1  13 3937.01 255.124   3
   1  -1 -13 3998.29 255.574   3
  -1  -1  13 3511.35 194.554   6
  -1  -1  12 618.276 111.973   4
   1  -1 -12 733.492 123.374   1
  -1  -1  12 703.433 115.567   2
   1   1 -12 603.978 112.842   1
  -1   1  12 702.296 102.478   3
  -1   1  12 685.084 114.695   4
  -1  -1  12 591.234 75.4386   6
  -1   1  12 621.335 104.508   2
   1  -1 -12 660.350 99.8781   3
   1   1 -12 739.670 104.594   3
   1  -1 -11 309.053 78.7582   1
  -1  -1  11 269.171 71.6061   2
  -1   1  11 309.807 68.0525   3
  -1   1  11 363.169 80.1816   2
   1   1 -11 331.440 86.5931   1
  -1  -1  11 304.108 53.5264   6
  -1  -1  10 11.6667 22.1761   2
   1  -1 -10 7.34440 7.02193   5
  -1   1  10 24.1395 22.2390   2
  -1   1  10 23.5678 22.7035   3
  -1  -1  10 17.0965 8.16185   5
   1   1 -10 31.6526 25.6098   1
  -1  -1  10 69.7405 28.6885   6
   1  -1 -10 11.9926 35.3838   1
  -1  -1   9 4017.94 173.501   6
  -1  -1   9 3570.54 112.767   5
  -1   1   9 4089.89 211.850   3
   1   1  -9 4110.38 254.522   1
   1  -1  -9 3954.39 246.588   1
   1  -1  -9 3641.28 117.539   5
  -1  -1   9 4097.22 230.155   2
  -1   1   9 3984.89 228.424   2
  -1  -1   8 11559.9 239.490   5
  -1   1   8 12685.7 369.526   3
  -1  -1   8 12334.6 310.228   6
   1  -1  -8 11578.6 244.334   5
  -1  -1   8 12699.4 399.890   2
   1   1  -8 12185.6 429.249   1
   1  -1  -8 12220.8 414.077   4
   1  -1  -8 12961.0 268.239   6
   1  -1  -7 13738.8 420.225   4
  -1  -1   7 13567.7 393.820   2
  -1   1   7 13525.2 363.708   3
   1  -1  -7 13144.9 265.933   5
   1  -1  -7 13784.6 262.953   6
   1   1  -7 13774.4 432.157   1
  -1  -1   7 13339.6 263.603   5
   1   1  -6 1234.67 113.819   1
  -1  -1   6 1279.34 104.654   2
   1  -1  -6 1153.00 65.8075   5
  -1   1   6 1227.54 94.5750   3
   1  -1  -6 1335.25 59.7209   6
   1  -1  -6 1301.62 112.554   4
  -1   1   5 4621.75 171.470   3
   1  -1  -5 4630.28 105.295   6
   1  -1  -5 4477.76 145.270   8
   1  -1  -5 4494.29 205.694   4
  -1  -1   5 5342.50 197.205   2
   1   1  -5 5557.60 225.244   1
   1  -1  -5 4656.77 140.215   5
  -1   1   4 238.726 35.3334   3
   1   1  -4 762.004 77.1184   1
   1  -1  -4 208.572 43.6373   4
   1  -1  -4 301.168 35.2961   5
  -1  -1   4 758.301 64.7552   2
  -1   1   3 38458.5 543.697   8
  -1   1   3 38293.9 575.656   3
   1  -1  -3 38113.0 577.727   5
   1   1  -3 36452.2 632.626   1
   1  -1  -3 38630.2 543.612   8
   1  -1  -3 39098.4 649.723   4
  -1  -1   3 36429.4 579.639   2
   1  -1  -2 12580.9 258.347   5
  -1   1   2 12074.2 235.317   3
  -1   1   2 12419.0 227.562   8
  -1  -1   2 14101.0 241.064   2
  -1   1   1 12157.3 222.599   3
   1   1   1 13866.1 255.528   8
  -1   1  -1 11573.3 229.001   1
  -1  -1  -1 13307.5 226.425   4
   1  -1   1 12073.1 231.349   7
   1   1   2 21949.6 374.669   3
  -1  -1  -2 21296.7 338.002   4
  -1   1  -2 20566.5 382.371   6
   1  -1   2 20339.3 347.114   7
  -1   1  -2 20347.1 378.137   1
   1   1   2 22628.3 401.592   7
   1  -1   2 20254.7 396.656   2
  -1   1  -3 1568.91 96.1259   1
  -1   1  -3 1532.20 89.6101   6
   1  -1   3 1472.02 76.7671   7
   1  -1   3 1503.03 75.4273   5
  -1  -1  -3 1008.52 62.4263   4
   1  -1   3 1483.85 95.8277   2
   1   1   3 1039.86 69.0328   2
   1   1   3 1008.74 72.9198   3
  -1   1  -4 3799.82 156.827   6
  -1  -1  -4 4297.00 149.489   4
   1  -1   4 3628.88 122.578   5
  -1  -1  -4 4279.99 161.286   6
   1   1   4 4185.86 162.635   2
  -1   1  -4 3607.40 169.736   1
   1   1   4 4297.92 165.675   3
   1  -1   4 3706.33 169.572   2
  -1   1  -5 5030.79 194.175   6
  -1   1  -5 5048.36 218.970   1
   1  -1   5 5058.87 145.126   5
   1   1   5 5035.98 180.823   4
   1   1   5 4836.42 193.979   3
   1   1   5 5193.51 200.904   2
   1  -1   5 4946.60 211.783   2
  -1  -1  -5 5129.46 189.573   6
  -1  -1  -5 5025.53 182.353   4
  -1  -1  -6 483.265 61.0801   6
  -1   1  -6 475.238 60.6232   6
   1  -1   6 490.286 63.2312   6
   1   1   6 551.033 69.7297   3
   1  -1   6 494.264 41.4935   5
   1  -1   6 418.496 66.4217   2
   1   1   6 426.770 57.1687   4
  -1   1  -6 541.308 77.5548   1
  -1  -1  -6 518.126 62.9604   4
   1   1   6 564.746 70.2691   2
   1  -1   7 81.0730 29.3338   6
   1  -1   7 64.3097 31.7613   2
  -1  -1  -7 125.098 33.7826   4
   1   1   7 167.340 42.0450   2
   1   1   7 163.358 40.1332   4
  -1   1  -7 95.8533 41.1722   1
  -1  -1  -7 125.170 37.4004   6
   1   1   7 141.085 41.6473   3
   1  -1   7 53.1119 14.4294   5
   1   1   8 12495.0 377.408   4
   1  -1   8 13073.2 378.691   6
   1   1   8 13287.0 416.326   2
   1  -1   8 13195.8 427.665   2
  -1  -1  -8 11816.3 250.843   5
   1  -1   8 11785.3 238.967   5
  -1   1  -8 12541.5 444.765   1
   1   1   8 12879.8 399.774   3
  -1  -1  -8 13219.1 364.210   6
   1  -1   9 92.6937 41.3654   2
   1   1   9 60.5458 27.3779   2
   1   1   9 60.3798 30.5911   3
  -1   1  -9 90.5493 51.0705   1
   1   1   9 97.7790 40.2900   4
  -1  -1  -9 52.7202 15.3722   5
   1  -1   9 68.5364 34.2674   6
   1  -1   9 42.5308 10.8488   5
  -1  -1  -9 91.5886 36.0939   6
  -1   1 -10 183.619 59.9575   1
  -1  -1 -10 223.104 46.5480   6
   1  -1  10 209.830 59.1835   2
  -1  -1 -10 167.763 22.4373   5
   1   1  10 226.291 56.9450   4
   1   1  10 188.535 56.2010   3
   1   1  10 303.257 71.9065   2
   1  -1  10 286.493 64.1184   4
   1  -1  10 248.583 57.1448   6
   1  -1  11 2573.66 180.609   6
   1   1  11 2575.35 207.440   2
   1   1  11 2269.17 180.334   4
  -1   1 -11 2601.71 227.726   1
  -1  -1 -11 2344.29 165.455   6
   1   1  11 2419.03 193.211   3
  -1  -1 -11 2429.36 219.407   1
   1  -1  11 2620.99 215.069   2
   1  -1  11 2586.58 194.512   4
   1  -1  12 950.695 135.042   2
  -1  -1 -12 1153.51 119.032   6
   1  -1  12 888.833 111.953   6
  -1   1 -12 949.198 144.133   1
   1   1  12 976.753 134.887   2
  -1   1 -12 878.983 128.655   2
   1   1  12 1123.08 138.176   3
  -1  -1 -12 1072.74 149.888   1
  -1  -1 -13 251.940 71.4894   3
  -1  -1 -13 263.161 77.9826   1
  -1  -1 -13 263.112 63.8567   6
  -1   1 -13 341.883 81.3717   3
   1  -1  13 352.128 91.5573   2
   1   1  13 292.506 78.1961   3
  -1   1 -13 334.559 86.6423   2
   1   1  13 228.941 66.6998   2
   1  -1  13 373.035 76.2530   6
  -1   1 -13 307.255 87.8648   1
   1  -1  14 10768.6 467.939   4
   1  -1  14 10916.2 430.391   6
  -1   1 -14 11156.2 544.852   1
  -1   1 -14 10655.4 468.336   3
   1   1  14 10730.6 458.996   4
   1   1  14 10876.9 494.652   2
  -1   1 -14 11125.0 497.507   2
   1  -1  14 11319.2 516.947   2
  -1  -1 -14 10727.9 471.675   3
  -1  -1 -14 11176.9 549.645   1
  -1  -1 -14 11112.0 413.855   6
   1  -1  15 2284.14 196.308   6
   1   1  15 2337.30 218.947   4
  -1  -1 -15 2408.62 191.407   6
   1  -1  15 2371.44 222.950   4
  -1   1 -15 2479.11 228.614   3
  -1  -1 -15 2567.01 234.725   3
  -1  -1 -16 653.867 124.340   3
   1  -1  16 668.474 108.149   6
   1  -1  16 468.859 109.527   4
  -1   1 -16 571.023 115.887   3
   1   1  16 521.299 108.085   4
   1  -1  17 1318.33 184.303   4
  -1  -1 -17 1392.61 185.397   3
  -1   1 -17 1732.97 207.124   3
   1  -1  17 1557.95 170.682   6
   1   1  17 1354.59 179.783   4
   1   1  18 393.634 100.730   4
  -1  -1 -18 445.180 111.448   3
   1  -1  18 328.521 75.3049   6
   1  -1  18 354.464 95.6228   4
  -1   1 -18 308.214 94.8316   3
  -1   1 -19-44.7350 57.1893   3
  -1  -1 -19 59.2336 55.2041   3
   1   1  19 42.7553 48.7005   4
   1  -1  19 66.3180 56.4430   4
   1  -1  20-38.3107 41.0477   4
  -1  -1 -20-59.0702 65.6120   3
  -1   1 -20-14.9129 58.5235   3
   1   1  20 26.3107 34.9870   4
   1  -1  21 877.016 165.442   4
   1   1  21 873.274 164.071   4
  -1  -1 -21 1082.15 190.588   3
  -1   1 -21 927.320 173.889   3
   1   1  22 277.998 108.126   4
  -1  -1 -22 338.206 115.778   3
   1  -1  22 180.931 88.8597   4
  -1   1 -22 223.451 97.5134   3
   1   1  23-37.0438 58.9966   4
  -1  -1 -23 30.8338 49.2124   3
  -1   1 -23-67.5175 59.3985   3
   1  -1  23-27.1776 33.8829   4
   1   1  24 184.590 97.7442   4
   1  -1  24 139.723 71.4644   4
   1   1  25 991.933 205.781   4
   1  -1  25 841.078 177.185   4
  -1  -2  25 201.052 93.9830   4
  -1   2  25 417.166 137.977   4
  -1   2  24 484.810 140.748   4
  -1  -2  24 233.446 106.056   4
   1   2 -24 264.677 103.818   3
   1  -2 -24 342.487 118.091   3
   1   2 -23-13.4961 36.0128   3
  -1   2  23 66.7774 68.9651   4
   1  -2 -23 7.55438 36.0179   3
  -1  -2  22 4527.01 421.442   4
   1  -2 -22 4178.66 370.362   3
   1   2 -22 4704.69 388.421   3
  -1   2  22 4085.38 388.954   4
  -1   2  21 1555.37 233.562   4
   1  -2 -21 1661.92 229.575   3
   1   2 -21 1442.30 206.876   3
  -1  -2  21 1337.91 225.624   4
   1   2 -20 2628.80 271.508   3
  -1  -2  20 2774.22 303.254   4
  -1   2  20 2939.51 311.489   4
   1  -2 -20 2761.56 279.985   3
  -1  -2  20 2545.56 219.039   6
  -1  -2  19 77.8444 40.9574   6
  -1   2  19-2.25848 43.7127   4
   1  -2 -19 1.28071 37.0649   3
  -1  -2  19 148.951 77.9865   4
   1   2 -19 55.8099 45.1917   3
   1  -2 -18 2184.46 233.606   3
   1   2 -18 1884.86 212.401   3
  -1  -2  18 2478.94 271.112   4
  -1  -2  18 2106.64 189.679   6
  -1   2  18 2250.17 260.815   4
   1   2 -17 111.017 54.4765   3
   1  -2 -17 24.4764 44.8872   3
  -1   2  17 37.2568 49.9823   4
  -1  -2  17 140.891 53.7639   6
  -1  -2  17 125.166 72.9126   4
  -1  -2  16 6.00854 21.5801   6
   1   2 -16 30.8252 29.8348   3
  -1   2  16 7.15476 34.0236   4
   1  -2 -16-24.2222 36.0864   3
  -1  -2  16-18.7382 35.8611   4
  -1  -2  15 425.836 75.8007   6
   1   2 -15 401.489 92.2084   3
   1  -2 -15 426.537 98.0282   3
  -1   2  15 364.432 99.4664   4
  -1  -2  15 460.086 108.711   4
  -1  -2  15 353.363 93.4032   2
  -1   2  15 428.210 95.1385   3
   1  -2 -15 483.451 122.018   1
  -1  -2  14 1942.68 209.105   4
  -1  -2  14 1899.52 154.577   6
  -1   2  14 1684.42 189.581   2
  -1   2  14 1495.15 185.211   4
   1  -2 -14 1788.05 184.873   3
   1   2 -14 1905.70 184.154   3
  -1  -2  14 1857.81 201.797   2
   1  -2 -14 1626.96 206.710   1
  -1   2  14 1674.34 174.523   3
   1   2 -14 1702.66 207.117   1
   1  -2 -13 1067.70 159.193   1
  -1  -2  13 918.500 135.524   2
  -1   2  13 1134.48 152.360   4
   1  -2 -13 892.579 57.8713   5
   1   2 -13 1115.19 162.094   1
   1   2 -13 1020.03 130.522   3
   1  -2 -13 1110.17 93.9598   6
   1  -2 -13 1067.55 137.912   3
  -1   2  13 1076.44 133.924   3
  -1   2  13 1223.95 154.030   2
  -1  -2  13 986.616 109.165   6
   1  -2 -12 2388.21 215.161   4
   1   2 -12 2767.54 204.724   3
  -1   2  12 2238.40 200.422   2
   1  -2 -12 2024.61 97.7999   5
  -1  -2  12 2811.49 176.318   6
   1  -2 -12 2437.85 134.055   6
   1  -2 -12 2450.38 195.867   3
   1   2 -12 2779.85 244.730   1
  -1  -2  12 2364.30 95.2309   5
  -1  -2  12 2904.48 230.205   2
  -1   2  12 2140.19 183.518   3
  -1   2  12 2292.51 208.237   4
  -1  -2  11 72.5769 31.6385   6
   1  -2 -11 186.801 31.8170   5
  -1  -2  11 92.7891 42.4100   2
  -1  -2  11 79.4468 19.6692   5
   1   2 -11 36.9191 32.0489   1
  -1   2  11 212.956 56.9206   3
   1  -2 -11 209.389 67.9174   4
   1  -2 -11 219.070 37.6698   6
  -1  -2  10 1056.00 126.826   2
   1  -2 -10 809.472 65.0747   5
   1  -2 -10 824.795 68.6570   6
  -1   2  10 704.953 94.8041   3
   1   2 -10 909.903 128.796   1
   1  -2 -10 711.964 109.954   4
  -1   2   9 3794.90 209.418   3
   1  -2  -9 3707.18 146.228   5
   1  -2  -9 3797.13 239.909   4
   1   2  -9 4011.37 257.758   1
   1  -2  -9 3744.90 141.890   6
  -1  -2   9 3848.84 228.420   2
   1  -2  -8 1440.47 141.813   4
  -1   2   8 1252.08 113.649   3
   1   2  -8 1134.60 130.901   1
  -1  -2   8 1219.85 121.743   2
   1  -2  -8 1357.38 77.8008   6
   1  -2  -7 7816.64 320.550   4
  -1   2   7 8212.63 283.513   3
   1  -2  -7 7681.63 197.893   8
   1  -2  -7 8215.01 195.515   6
  -1  -2   7 8226.72 303.007   2
   1   2  -7 7916.73 333.380   1
   1   2  -6 10995.1 376.987   1
  -1   2   6 11856.6 329.314   3
   1  -2  -6 11111.0 227.042   8
   1  -2  -6 11542.7 375.151   4
  -1  -2   6 11411.0 341.972   2
  -1  -2   5 25944.9 513.352   2
   1  -2  -5 21592.1 349.588   8
   1   2  -5 26046.1 574.206   1
  -1   2   5 23877.7 483.453   3
   1  -2  -5 23407.5 540.303   4
   1   2  -4 6427.06 243.014   1
   1  -2  -4 5756.68 230.906   4
  -1   2   4 5655.30 195.764   3
  -1  -2   4 6613.15 213.210   2
  -1   2   3 50653.9 772.449   3
  -1   2   3 48873.0 655.528   8
   1  -2  -3 50524.0 838.231   4
  -1  -2   3 49914.1 757.077   2
   1   2  -3 50723.7 835.785   1
   1   2  -2 14089.3 343.566   1
  -1  -2   2 14413.0 290.201   7
  -1  -2   2 14384.4 293.311   2
   1  -2  -2 17773.5 381.588   4
   1  -2  -1 158517. 2019.38   4
   1   2  -1 156162. 1935.96   7
  -1  -2   1 152558. 1906.20   2
  -1  -2   1 151837. 1924.93   7
   1   2  -1 151994. 1993.68   1
   1   2   0 2709.49 114.323   3
  -1  -2   0 2621.63 103.334   7
   1  -2   0 1963.39 105.943   4
   1   2   0 2686.19 106.726   7
  -1   2   0 2006.14 91.6963   1
   1   2   0 2652.89 115.872   8
   1   2   0 2642.68 115.524   1
   1   2   1 11400.4 268.336   7
  -1   2  -1 11181.4 260.850   1
  -1  -2  -1 11611.1 270.081   4
   1  -2   1 11533.9 300.235   2
   1  -2   1 11708.6 278.101   4
   1   2   1 11714.6 268.300   3
   1   2   1 12173.0 261.495   8
   1   2   2 45881.8 740.724   3
   1   2   2 45681.5 694.270   8
   1  -2   2 49493.6 797.348   2
   1   2   2 47482.8 752.383   7
  -1   2  -2 49474.8 650.910   7
  -1  -2  -2 46954.0 735.446   4
  -1   2  -2 48957.9 764.032   1
   1  -2   2 49497.6 655.922   7
  -1  -2  -3 91983.1 1203.65   8
   1  -2   3 89603.0 1329.76   2
  -1   2  -3 92358.0 1315.94   1
   1   2   3 91102.7 1282.55   3
  -1  -2  -3 90746.6 1262.02   4
   1  -2   3 90339.7 1176.90   7
   1   2   3 90527.6 1189.88   8
  -1  -2  -4 33933.3 608.174   4
   1  -2   4 35682.3 676.702   2
  -1  -2  -4 33484.9 535.107   8
   1  -2   4 35450.0 545.714   7
   1   2   4 33993.9 608.101   4
  -1   2  -4 35553.8 674.728   1
   1   2   4 32758.4 622.225   3
  -1  -2  -5 25061.6 433.909   8
  -1   2  -5 23693.7 566.000   1
  -1  -2  -5 25785.1 517.748   4
   1  -2   5 24449.4 562.621   2
   1   2   5 25644.5 532.392   3
   1   2   5 24787.1 510.878   4
   1  -2   6 623.226 85.5364   2
  -1   2  -6 602.915 83.6844   1
   1   2   6 1068.35 95.8232   4
   1   2   6 1110.50 101.745   3
  -1  -2  -6 1004.70 93.4917   4
   1   2   7 4390.05 217.129   2
  -1  -2  -7 4463.74 212.216   4
  -1   2  -7 3387.61 214.771   1
   1   2   7 4389.35 215.178   3
  -1  -2  -7 4308.89 196.567   6
   1   2   7 3955.96 201.901   4
   1  -2   7 3431.05 186.408   6
   1  -2   7 3628.43 216.577   2
   1   2   8 13759.0 410.141   4
   1   2   8 14372.9 434.672   2
   1  -2   8 13152.0 298.486   5
   1  -2   8 12921.1 447.936   2
   1   2   8 14163.3 429.455   3
   1  -2   8 12804.3 396.274   6
  -1   2  -8 12847.7 461.029   1
  -1  -2  -8 14225.1 422.219   4
  -1  -2  -8 14420.3 391.061   6
   1  -2   9 1232.03 142.781   2
   1  -2   9 1206.27 118.473   6
  -1  -2  -9 1426.34 132.677   4
  -1   2  -9 1184.30 139.966   1
   1   2   9 1330.80 132.818   2
  -1  -2  -9 1300.93 114.213   6
   1   2   9 1410.91 135.591   3
   1  -2   9 1135.30 75.1529   5
   1   2   9 1289.26 124.779   4
   1  -2  10 771.214 112.913   2
   1   2  10 815.037 107.952   3
   1  -2  10 839.495 63.2356   5
  -1  -2 -10 750.295 90.2368   6
   1   2  10 854.337 115.307   2
  -1   2 -10 922.493 131.196   1
  -1  -2 -10 740.934 102.333   4
   1   2  10 726.599 99.8969   4
   1  -2  10 810.971 101.978   6
  -1  -2 -11 196.296 54.8328   4
   1   2  11 218.883 59.5531   3
   1  -2  11 397.991 86.3231   2
   1  -2  11 289.418 34.4276   5
  -1  -2 -11 202.327 47.6619   6
   1  -2  11 312.261 66.1576   6
  -1   2 -11 392.245 88.3538   1
   1   2  11 235.836 63.0804   2
  -1   2 -12 103.489 47.4496   2
   1   2  12 15.3936 20.5517   3
   1  -2  12 46.5552 12.1696   5
  -1   2 -12 84.6060 39.3935   1
   1  -2  12 124.059 60.4299   2
  -1  -2 -12 53.9033 35.4125   6
   1   2  12 45.4738 25.5621   2
   1  -2  12 120.889 47.2742   6
  -1  -2 -12 84.5891 44.4249   3
  -1  -2 -12 23.4120 11.7299   5
  -1  -2 -13 72.7735 40.9809   3
   1   2  13 53.5742 37.0510   2
  -1   2 -13 96.4713 57.2659   2
   1  -2  13 29.1647 26.2198   6
   1  -2  13 27.3219 33.9015   2
  -1  -2 -13 109.737 47.1123   6
  -1  -2 -13 39.0755 13.4715   5
  -1   2 -13 107.781 63.0597   1
   1   2  13 37.3569 37.9459   3
  -1   2 -13 35.6245 31.3007   3
   1   2  14 5963.45 350.213   3
   1  -2  14 6147.15 383.876   2
  -1   2 -14 5881.75 392.548   1
   1   2  14 5724.51 357.153   2
  -1  -2 -14 5742.68 288.339   6
   1  -2  14 6285.59 360.816   4
  -1   2 -14 5988.02 348.039   3
   1   2  14 5836.66 339.009   4
  -1  -2 -14 5833.07 345.920   3
  -1   2 -14 6070.74 365.145   2
   1  -2  14 6165.82 324.692   6
  -1  -2 -15 3957.78 296.977   3
  -1  -2 -15 3865.69 242.163   6
   1   2  15 3612.58 276.614   4
   1  -2  15 3694.72 283.225   4
   1  -2  15 3432.08 249.704   6
  -1   2 -15 3787.83 297.705   2
  -1   2 -15 3646.49 284.123   3
  -1   2 -16 51.8460 53.0572   2
  -1   2 -16 37.4983 40.1385   3
  -1  -2 -16 34.1087 43.7298   3
   1   2  16 95.6156 52.3643   4
   1  -2  16 54.2307 46.9880   4
  -1  -2 -16 44.1151 29.1757   6
   1  -2  16-12.0810 37.1571   6
   1   2  17 250.684 83.4940   4
   1  -2  17 240.588 83.1516   4
  -1  -2 -17 354.761 80.7117   6
  -1  -2 -17 365.505 94.0691   3
  -1   2 -17 277.300 84.7105   3
   1  -2  17 330.930 84.1087   6
   1  -2  18-3.83358 42.7514   4
  -1  -2 -18 99.3653 57.9551   3
  -1   2 -18 69.6384 60.7505   3
   1   2  18-1.02628 35.7861   4
  -1  -2 -18 29.8436 41.0599   6
  -1  -2 -19 412.853 113.137   3
   1  -2  19 330.241 97.4678   4
  -1   2 -19 309.129 96.6184   3
   1   2  19 454.164 115.749   4
  -1  -2 -20 544.658 133.272   3
   1   2  20 475.307 119.801   4
  -1   2 -20 326.685 105.798   3
   1  -2  20 331.325 107.366   4
   1   2  21 178.751 88.2365   4
  -1  -2 -21 165.070 74.0593   3
  -1   2 -21 200.510 85.8894   3
   1  -2  21 199.401 83.2495   4
   1  -2  22 34.8993 43.1437   4
  -1   2 -22 47.8228 38.7190   3
   1   2  22 81.3665 55.9713   4
  -1  -2 -22 11.6238 37.9449   3
  -1   2 -23 259.635 107.973   3
   1  -2  23 119.853 46.0121   4
  -1  -2 -23 335.813 116.525   3
   1   2  23 459.215 134.996   4
   1  -2  24 56.4262 42.1465   4
   1   2  24 37.2343 51.6576   4
   1   2  25-68.6752 61.3667   4
   1  -2  25-40.8774 54.7177   4
   1  -2  25 32.5089 40.3100   7
  -1  -3  25 32.3671 51.9404   4
  -1   3  25 77.5571 67.2545   4
  -1   3  24 144.456 105.052   4
  -1  -3  24 62.1842 69.0565   4
   1  -3 -23 1887.42 262.798   3
  -1   3  23 1711.29 260.934   4
  -1  -3  23 2079.01 291.076   4
   1   3 -23 1897.97 255.149   3
   1   3 -22 229.823 89.2812   3
  -1  -3  22 196.371 95.3348   4
   1  -3 -22 235.147 94.8824   3
  -1   3  22 416.575 130.013   4
   1   3 -21 84.9125 66.0849   3
   1  -3 -21 38.3898 40.6714   3
  -1   3  21 53.7043 52.8232   4
  -1  -3  21 30.2222 44.1685   4
  -1  -3  20 311.254 113.822   4
   1  -3 -20 187.913 73.5179   3
  -1   3  20 214.233 88.3670   4
   1  -3 -20 201.062 55.6758   8
   1   3 -20 240.253 88.6609   3
   1  -3 -19 74.5061 51.1549   3
  -1  -3  19 287.568 106.993   4
   1  -3 -19 55.9459 29.5354   8
  -1   3  19 76.9544 51.7015   4
   1   3 -19 176.596 66.9086   3
  -1  -3  19 192.607 62.6902   6
   1  -3 -18 1054.26 115.432   8
   1   3 -18 1593.91 199.251   3
  -1  -3  18 1570.75 216.953   4
  -1   3  18 1278.09 199.139   4
   1  -3 -18 1191.41 178.911   3
  -1  -3  18 1503.58 166.365   6
  -1  -3  17 810.258 164.381   4
  -1   3  17 1112.24 179.099   4
  -1  -3  17 856.107 122.315   6
   1   3 -17 811.307 137.235   3
   1  -3 -17 860.493 145.774   3
  -1  -3  16 718.584 109.208   6
  -1   3  16 920.604 156.958   4
   1  -3 -16 973.396 147.409   3
   1  -3 -16 890.454 94.8241   6
   1   3 -16 738.794 128.616   3
   1   3 -15 1846.18 191.635   3
   1  -3 -15 1723.85 95.2794   5
  -1  -3  15 1963.74 173.416   6
   1  -3 -15 2044.24 139.680   6
  -1   3  15 2146.36 235.076   4
   1  -3 -15 2581.51 230.919   3
  -1  -3  15 1844.10 233.655   1
   1   3 -15 1685.52 197.350   2
  -1   3  14 114.151 53.0566   4
   1  -3 -14 167.390 62.2361   3
   1  -3 -14 146.218 31.1771   5
  -1   3  14 201.629 72.7014   2
   1   3 -14 76.4262 55.1054   1
   1  -3 -14 146.995 60.7695   4
  -1  -3  14 207.072 73.6650   2
  -1  -3  14 144.805 26.3756   5
   1  -3 -14 206.594 42.5196   6
  -1   3  14 191.814 61.6518   3
  -1  -3  14 193.111 78.6002   1
  -1  -3  14 102.585 48.1815   6
   1   3 -14 125.574 56.7754   2
   1   3 -14 183.209 62.0606   3
  -1   3  13 22.8707 20.4180   3
  -1  -3  13-18.8770 28.0326   1
   1  -3 -13 15.8500 26.4922   4
  -1   3  13 51.1080 44.6786   4
   1   3 -13-44.1003 40.8071   2
  -1  -3  13 81.7173 46.6356   2
   1  -3 -13-13.0438 27.6051   3
   1  -3 -13 12.8573 18.5524   6
  -1  -3  13 11.4280 26.1742   6
   1  -3 -13-0.74695 11.6275   5
   1   3 -13-28.5542 36.4468   3
   1   3 -13 25.1992 38.4401   1
   1  -3 -12 2.81010 14.4515   6
   1  -3 -12-14.1807 30.6414   4
   1  -3 -12 48.0125 21.4346   8
  -1  -3  12 27.7405 18.9627   6
   1   3 -12 92.9792 48.9460   1
   1  -3 -12 13.4500 16.3871   5
  -1   3  12 15.3300 33.0341   4
  -1  -3  12 125.288 53.1316   2
  -1  -3  12 4.18365 30.3108   1
   1   3 -12 19.7544 28.0146   2
   1   3 -12 4.77498 22.4138   3
   1  -3 -12 0.52317 19.8056   3
  -1   3  12 16.9193 20.8313   3
   1  -3 -11 124.288 53.7850   4
   1  -3 -11 90.8634 26.4332   6
  -1   3  11 85.4223 44.1715   4
   1  -3 -11 93.7390 24.2742   8
  -1  -3  11 57.9098 45.8555   2
   1   3 -11 62.7730 35.6670   1
  -1   3  11 66.2435 38.8178   3
   1   3 -11 98.7338 40.8757   2
   1  -3 -11 82.1208 34.7254   3
  -1  -3  10 3324.13 231.382   2
   1  -3 -10 2605.42 130.518   6
   1  -3 -10 2279.73 105.795   8
   1  -3 -10 2578.18 210.504   4
  -1   3  10 2447.35 183.758   3
   1   3 -10 3577.49 265.346   1
  -1  -3   9 1000.52 119.782   2
  -1   3   9 920.502 106.103   3
   1  -3  -9 860.017 56.2831   8
   1  -3  -9 902.464 72.7118   6
   1  -3  -9 1026.05 130.388   4
   1   3  -9 1059.28 137.618   1
   1   3  -8 20238.8 600.835   1
   1  -3  -8 21685.2 596.336   4
  -1   3   8 20908.5 524.716   3
  -1  -3   8 21246.2 558.414   2
   1   3  -7 235.345 61.8532   1
   1  -3  -7 438.536 77.3249   4
  -1  -3   7 257.730 57.9015   2
  -1   3   7 499.900 71.0049   3
   1  -3  -6 49979.0 972.064   4
  -1   3   6 51308.3 894.678   3
  -1  -3   6 49092.3 907.013   2
   1   3  -6 49992.2 986.318   1
  -1  -3   5 1916.14 130.937   2
   1  -3  -5 1764.92 142.409   4
   1   3  -5 1977.89 153.215   1
  -1   3   5 1648.94 119.753   3
   1   3  -4 4586.89 221.008   1
  -1  -3   4 4525.68 189.549   2
   1  -3  -4 4151.84 211.887   4
  -1   3   4 3930.72 180.222   3
  -1   3   3 10070.6 295.661   3
   1  -3  -3 9962.24 325.032   4
   1   3  -3 9980.37 274.126   2
  -1  -3   3 10066.7 279.512   2
  -1  -3   3 10168.6 233.783   7
   1   3  -3 10304.6 327.036   1
  -1  -3   2 32278.8 561.536   2
   1  -3  -2 33771.3 654.863   4
   1   3  -2 31310.0 557.516   2
  -1  -3   2 31506.8 506.222   7
   1   3  -2 32304.1 632.667   1
  -1   3   2 33155.9 608.965   3
   1   3  -2 32481.2 518.373   7
   1   3  -1 29235.9 480.764   7
  -1  -3   1 28469.2 469.919   7
   1   3  -1 28714.3 503.335   2
   1   3  -1 28995.1 567.880   1
  -1   3   1 28970.4 525.262   1
  -1  -3   1 28575.8 504.679   2
   1  -3  -1 29849.5 593.344   4
  -1  -3   0 31810.2 521.062   7
   1   3   0 32341.0 578.195   8
   1   3   0 31867.6 588.018   3
  -1   3   0 29517.9 553.014   1
   1   3   0 31059.4 532.406   2
  -1  -3   0 31748.1 598.851   4
   1   3   0 32262.6 528.249   7
   1   3   0 31831.9 590.012   1
   1  -3   0 29742.6 601.939   4
  -1  -3  -1 4413.14 186.321   4
  -1   3  -1 5000.89 122.065   7
   1   3   1 4536.75 166.125   8
   1   3   1 4473.12 167.881   7
  -1   3  -1 5250.85 193.867   1
   1   3   1 4377.26 180.715   1
   1   3   1 4538.76 183.043   3
   1  -3   1 5182.46 206.255   4
   1  -3   1 5367.87 217.521   2
  -1  -3  -2 2654.60 143.121   4
  -1   3  -2 1887.26 121.284   1
   1  -3   2 2115.24 140.233   2
   1  -3   2 2034.87 127.227   4
   1   3   2 2550.15 113.994   8
   1   3   2 2728.46 141.390   3
   1   3   2 2839.25 135.879   7
   1  -3   3 2725.10 86.9632   7
   1   3   3 3376.07 164.492   3
  -1  -3  -3 3127.95 158.681   4
   1  -3   3 2950.50 169.715   2
  -1   3  -3 2755.85 157.799   1
   1   3   3 3476.36 127.040   8
  -1  -3  -3 3295.28 126.817   8
   1   3   4 1643.59 118.511   3
   1   3   4 1766.27 124.978   4
   1  -3   4 1819.25 77.3525   7
   1  -3   4 1852.19 137.791   2
  -1   3  -4 1841.55 135.312   1
  -1  -3  -4 1616.94 85.1410   8
   1   3   4 1555.96 80.4159   8
  -1  -3  -4 1589.86 117.504   4
   1  -3   5 349.108 65.2670   2
  -1   3  -5 490.417 77.1160   1
  -1  -3  -5 163.621 29.3098   8
   1   3   5 163.610 41.3038   3
   1   3   5 154.564 40.0214   4
  -1  -3  -5 132.409 37.4322   4
   1  -3   5 459.388 44.3316   7
   1   3   6 283.850 56.4768   4
  -1  -3  -6 298.457 37.5038   8
   1   3   6 314.945 58.9929   3
   1  -3   6 290.216 59.8548   2
  -1   3  -6 316.477 68.7570   1
  -1  -3  -6 426.045 70.0362   4
   1  -3   6 341.865 45.4556   7
  -1  -3  -7 2225.72 107.191   8
   1   3   7 2373.96 164.304   3
   1   3   7 2227.06 160.882   4
  -1   3  -7 2996.21 208.906   1
   1  -3   7 2782.41 195.424   2
  -1  -3  -7 2342.59 162.647   4
   1  -3   7 2875.28 179.618   6
   1  -3   8 486.348 86.4204   2
  -1  -3  -8 310.143 62.5765   4
   1   3   8 343.155 67.5996   4
   1  -3   8 490.769 77.5744   6
   1   3   8 319.246 64.9034   3
  -1  -3  -8 310.234 41.7554   8
  -1   3  -8 555.182 96.0386   1
   1  -3   9 1831.82 174.397   2
   1   3   9 1644.81 146.857   4
   1  -3   9 1824.07 152.647   6
   1   3   9 1665.94 150.408   2
  -1   3  -9 1633.31 170.394   1
   1   3   9 1724.69 155.296   3
  -1  -3  -9 1728.99 154.185   4
  -1  -3  -9 1635.15 134.596   6
   1   3  10 1.87991 21.3603   3
   1  -3  10 75.0562 45.8005   2
  -1  -3 -10 47.7468 33.2775   4
  -1   3 -10-13.0556 37.0823   1
   1   3  10 24.7308 26.6007   2
   1  -3  10 36.3066 27.0676   6
  -1  -3 -10 8.63740 22.3774   6
   1   3  11 122.837 43.4770   2
  -1  -3 -11 174.354 47.3946   6
   1  -3  11 203.810 56.5104   6
  -1  -3 -11 197.776 55.5394   4
   1  -3  11 207.891 66.4371   2
   1  -3  11 258.886 41.8357   5
   1   3  11 130.508 46.4345   3
  -1   3 -11 305.387 81.9571   1
   1  -3  11 260.591 76.9579   1
   1   3  12 404.809 85.4911   2
   1  -3  12 252.564 75.4020   2
  -1  -3 -12 391.900 71.9407   6
  -1   3 -12 249.800 71.8958   2
   1  -3  12 270.234 40.4137   5
   1  -3  12 339.021 92.4665   1
  -1   3 -12 298.616 83.1049   1
  -1  -3 -12 445.528 90.1606   3
   1   3  12 363.233 81.2459   3
   1  -3  12 287.105 68.1882   6
  -1   3 -12 328.785 76.0286   3
  -1  -3 -12 285.869 72.6276   4
   1  -3  13 418.378 86.1384   6
   1   3  13 440.622 96.5063   2
  -1  -3 -13 455.509 80.5445   6
   1   3  13 442.859 91.7194   4
  -1   3 -13 405.677 86.8311   3
  -1  -3 -13 406.340 89.7080   3
  -1   3 -13 433.397 102.477   1
  -1   3 -13 404.877 96.0565   2
   1  -3  13 376.206 99.6325   1
   1   3  13 391.024 89.2237   3
   1  -3  13 401.916 101.610   2
   1  -3  13 330.127 42.7666   5
  -1  -3 -13 576.361 104.789   4
   1   3  14-7.74434 26.7707   4
   1   3  14 6.68686 29.5828   2
  -1   3 -14-26.3888 56.5252   1
   1  -3  14 7.49036 9.67210   5
  -1  -3 -14-23.0013 39.2620   3
   1  -3  14 37.0176 30.9880   6
  -1   3 -14-16.8203 35.9478   2
  -1   3 -14 11.8997 26.1384   3
  -1  -3 -14-17.9569 32.3305   6
  -1   3 -15 1728.05 205.645   2
  -1  -3 -15 964.622 67.8800   5
  -1  -3 -15 1348.21 176.944   3
  -1  -3 -15 1224.14 136.675   6
  -1   3 -15 1516.08 183.403   3
   1  -3  15 1498.85 167.547   6
   1   3  15 1079.07 155.558   4
  -1   3 -16 5336.45 361.527   3
   1  -3  16 5194.90 356.250   4
   1   3  16 5563.04 360.671   4
  -1   3 -16 5149.65 367.482   2
   1  -3  16 5315.29 329.967   6
  -1  -3 -16 5361.04 295.544   6
  -1  -3 -16 5759.96 377.491   3
  -1  -3 -17 156.472 68.4965   3
  -1  -3 -17 193.658 59.3918   6
  -1   3 -17 318.904 95.5091   3
   1   3  17 190.818 68.6436   4
  -1   3 -17 277.870 88.6505   2
   1  -3  17 184.453 69.1973   4
   1   3  18 189.605 71.7181   4
  -1  -3 -18 171.838 60.6579   6
  -1  -3 -18 197.166 79.4265   3
  -1   3 -18 295.954 97.2995   2
   1  -3  18 199.159 81.8822   4
  -1   3 -18 262.182 92.5782   3
  -1  -3 -19 908.101 128.555   6
  -1  -3 -19 887.815 165.644   3
   1  -3  19 690.577 142.651   4
   1   3  19 1095.86 176.034   4
  -1   3 -19 691.275 144.945   3
  -1   3 -20 138.024 79.7688   3
   1   3  20 132.031 78.4496   4
   1  -3  20 100.367 72.9055   4
  -1  -3 -20 71.7896 44.0579   3
  -1  -3 -20 96.1927 47.4131   6
  -1   3 -21 330.463 109.706   3
   1  -3  21 293.183 92.6346   4
  -1  -3 -21 300.918 105.988   3
   1   3  21 256.285 104.123   4
  -1  -3 -22 91.1074 67.8869   3
   1  -3  22 126.808 66.5776   4
   1   3  22 119.721 67.2163   4
  -1   3 -22 64.2264 46.2696   3
   1  -3  23 373.376 119.321   4
   1   3  23 24.4267 79.1978   4
   1  -3  24 695.315 150.260   7
   1  -3  24 850.740 183.997   4
   1   3  24 663.551 157.427   4
   1  -3  25-39.1530 51.9133   7
   1  -3  25 103.738 59.0882   4
  -1   4  24 57.8179 49.2755   4
  -1  -4  24 157.538 104.635   4
   1  -4 -23 36.4465 58.7727   3
   1   4 -23-22.9733 41.8588   3
  -1   4  23-11.4974 47.6138   4
  -1  -4  23-64.0849 53.5885   4
  -1  -4  22 364.724 131.717   4
  -1   4  22 628.989 159.240   4
   1  -4 -22 699.074 161.101   3
   1   4 -22 324.141 100.987   3
  -1   4  21 1124.10 202.368   4
   1  -4 -21 1020.65 182.753   3
   1   4 -21 922.144 175.794   3
  -1  -4  21 705.197 165.844   4
  -1   4  20 440.828 130.318   4
   1  -4 -20 300.821 101.059   3
  -1  -4  20 208.018 90.4692   4
   1   4 -20 150.526 77.6482   3
  -1   4  19 233.419 91.3149   4
   1  -4 -19 434.878 111.511   3
   1   4 -19 180.967 70.1603   3
   1  -4 -19 238.894 48.8381   8
  -1  -4  19 216.276 81.2156   4
  -1  -4  18 3590.29 269.328   6
   1  -4 -18 4445.93 349.176   3
   1   4 -18 3884.32 314.923   3
   1  -4 -18 3466.22 173.263   8
   1  -4 -18 4291.86 223.348   6
  -1   4  18 4504.77 372.971   4
   1   4 -17 7022.83 434.520   2
  -1  -4  17 7215.54 502.393   1
   1  -4 -17 7691.65 294.659   6
   1  -4 -17 5821.78 219.016   8
   1   4 -17 6937.69 412.226   3
   1  -4 -17 7004.68 428.761   3
  -1   4  17 7065.07 457.244   4
   1  -4 -17 5789.02 198.879   5
  -1  -4  17 7511.44 381.063   6
   1   4 -16 26.5137 46.3188   3
  -1  -4  16 42.3243 18.9061   5
   1  -4 -16 5.62680 12.5277   8
   1  -4 -16 20.2846 15.3081   6
   1  -4 -16 42.7134 23.1114   5
  -1  -4  16 45.1652 41.2621   6
   1   4 -16 0.19989 42.9296   2
  -1   4  16 1.52974 43.0387   4
   1  -4 -16 8.19459 38.0575   3
  -1  -4  16 9.74185 43.9440   1
  -1  -4  15 118.591 46.7742   6
  -1   4  15 69.8861 39.8559   4
   1  -4 -15 31.8236 18.7004   8
   1   4 -15-18.9527 48.1014   2
   1  -4 -15 117.780 32.4729   5
  -1  -4  15 4.55877 30.6218   1
   1   4 -15 66.3368 44.9888   3
   1  -4 -15 43.6520 45.0482   3
   1  -4 -15 38.3241 33.9980   4
   1  -4 -15 71.3748 28.7512   6
  -1  -4  14 979.828 167.180   1
   1   4 -14 1290.52 165.757   2
  -1   4  14 1245.95 173.946   4
  -1   4  14 1314.69 159.700   3
  -1  -4  14 1130.74 137.196   6
   1  -4 -14 1087.23 98.5239   5
   1  -4 -14 1361.76 182.712   4
   1  -4 -14 1045.71 72.5951   8
  -1  -4  14 1205.09 168.261   2
   1  -4 -14 1187.84 158.323   3
   1  -4 -14 1304.58 110.479   6
   1   4 -14 1044.44 143.393   3
   1  -4 -13-8.95975 31.0938   3
   1   4 -13 86.6227 44.9116   2
   1  -4 -13-3.32525 31.9277   4
  -1   4  13-12.8310 23.5455   3
  -1  -4  13 76.1877 54.8659   1
   1  -4 -13 24.6962 17.3223   6
   1  -4 -13 33.7107 12.2962   8
  -1  -4  13 94.6328 38.4474   2
  -1   4  13 49.8361 51.6286   4
   1   4 -13 42.3903 50.5427   1
  -1  -4  12 1076.84 145.279   2
   1   4 -12 1069.02 161.404   1
   1  -4 -12 1127.10 142.968   3
  -1   4  12 972.331 147.071   4
   1   4 -12 972.866 135.903   2
  -1   4  12 971.900 128.533   3
  -1  -4  12 979.265 153.425   1
   1  -4 -12 918.727 87.4559   6
   1  -4 -12 962.024 143.854   4
   1  -4 -11 2292.23 136.842   6
   1  -4 -11 2341.63 216.495   4
  -1   4  11 2493.98 198.350   3
   1  -4 -11 2441.61 202.189   3
  -1  -4  11 2135.42 198.129   2
   1   4 -11 2029.68 213.002   1
  -1   4  11 2147.29 209.701   4
   1   4 -11 1779.65 177.591   2
   1   4 -10 721.175 114.067   2
  -1   4  10 866.020 126.375   4
  -1  -4  10 805.243 115.350   2
   1  -4 -10 841.485 130.027   4
  -1   4  10 951.390 118.330   3
   1   4 -10 651.537 116.082   1
  -1  -4   9 1438.13 148.619   2
   1   4  -9 1454.84 166.792   1
   1  -4  -9 664.957 110.672   4
  -1   4   9 819.033 106.885   3
   1  -4  -8 808.144 116.719   4
   1   4  -8 726.795 115.058   1
  -1  -4   8 785.542 106.025   2
  -1   4   8 832.208 102.218   3
   1   4  -7 6038.69 319.171   1
  -1   4   7 7296.47 298.608   3
   1  -4  -7 7166.68 335.786   4
   1   4  -7 6215.02 281.338   2
  -1  -4   7 6269.31 287.957   2
   1  -4  -6 365.127 72.3545   4
  -1   4   6 339.691 63.7085   3
   1   4  -6 588.481 95.4220   1
   1   4  -6 395.506 67.8033   2
  -1  -4   6 495.994 76.2929   2
  -1   4   5 8244.42 304.926   3
   1  -4  -5 8416.38 344.158   4
   1   4  -5 8351.02 301.672   2
  -1  -4   5 8563.68 307.797   2
   1   4  -5 8359.27 344.533   1
  -1  -4   5 8356.34 226.607   7
  -1  -4   4 1209.72 104.809   2
  -1   4   4 1046.31 102.958   3
   1   4  -4 1273.93 125.538   1
   1  -4  -4 1055.12 115.100   4
  -1  -4   4 1204.17 74.2841   7
   1   4  -4 1277.56 107.132   2
   1  -4  -3 13293.6 421.692   4
   1   4  -3 13729.7 420.086   1
  -1   4   3 12649.1 380.875   3
  -1  -4   3 13634.0 277.639   7
   1   4  -3 13712.8 364.753   2
  -1  -4   3 14183.1 373.488   2
   1   4  -2 7182.97 195.702   7
   1   4  -2 7021.80 280.032   1
   1  -4  -2 7739.62 302.673   4
  -1  -4   2 7020.17 184.451   7
   1   4  -2 7065.81 245.312   2
  -1  -4   2 7301.59 248.810   2
  -1   4   2 7947.08 284.863   3
   1   4  -1 2431.66 111.414   7
   1   4  -1 2520.97 156.197   1
  -1   4   1 3014.73 155.603   1
  -1  -4   1 2435.16 106.775   7
   1  -4  -1 3075.63 182.507   4
   1   4  -1 2394.64 133.917   2
   1   4   0 104.542 30.8757   2
  -1  -4   0 56.6472 25.1605   4
   1   4   0 159.565 41.9273   1
   1   4   0 97.5239 26.8796   7
   1   4   0 135.176 34.0602   3
  -1   4   0 37.9858 23.7526   1
   1  -4   0 46.1132 32.4141   4
   1  -4   1 35126.9 721.000   4
   1   4   1 34551.5 622.556   7
  -1   4  -1 36077.9 686.216   1
   1   4   1 36481.4 650.604   8
   1   4   1 35345.0 695.012   3
  -1  -4  -1 34271.4 707.144   4
   1   4   1 34783.5 687.678   1
   1   4   2 5682.34 236.771   3
   1  -4   2 4951.08 239.646   2
   1  -4   2 4868.41 230.440   4
  -1  -4  -2 5889.93 250.519   4
  -1   4  -2 4797.66 220.957   1
   1   4   2 5865.66 199.706   8
   1   4   2 5847.89 216.084   7
   1   4   3 7623.57 285.696   3
   1  -4   3 7581.59 305.747   2
   1   4   3 7726.28 221.833   8
  -1   4  -3 7464.42 291.229   1
  -1  -4  -3 7621.48 291.205   4
   1  -4   4 10255.4 363.561   2
   1   4   4 8768.68 229.299   8
   1   4   4 9345.16 330.466   4
   1   4   4 9128.23 321.728   3
  -1   4  -4 10049.5 355.075   1
  -1  -4  -4 8754.44 322.130   4
  -1  -4  -5 577.762 52.4528   8
   1  -4   5 701.129 47.6913   7
   1   4   5 575.071 49.0598   8
   1  -4   5 818.512 103.813   2
   1   4   5 582.108 80.5512   3
  -1   4  -5 748.129 98.3472   1
  -1  -4  -5 494.521 73.8876   4
   1   4   5 576.771 81.3681   4
   1  -4   6 1162.38 71.0012   7
   1  -4   6 1154.37 128.579   2
  -1  -4  -6 760.158 59.5096   8
  -1   4  -6 1100.15 126.461   1
  -1  -4  -6 931.265 107.284   4
   1   4   6 769.039 100.151   4
   1   4   6 797.184 98.4756   3
  -1  -4  -7 264.390 62.4965   4
  -1  -4  -7 213.298 31.3091   8
   1   4   7 179.434 48.7670   3
   1   4   7 204.988 57.1155   4
   1  -4   7 340.417 76.0918   2
  -1   4  -7 280.763 70.1451   1
   1  -4   7 350.438 44.3940   7
   1   4   8 7772.98 336.603   3
  -1   4  -8 8462.51 390.205   1
  -1  -4  -8 7294.43 201.539   8
   1   4   8 7510.42 333.262   4
   1  -4   8 8364.46 381.611   2
  -1  -4  -8 7482.90 334.080   4
   1  -4   8 8116.40 250.456   7
  -1  -4  -9 1085.31 128.374   4
   1  -4   9 987.549 119.767   6
  -1  -4  -9 1068.66 74.6627   8
   1  -4   9 814.578 128.572   1
   1  -4   9 1016.64 137.124   2
   1   4   9 1239.99 134.701   3
  -1   4  -9 1060.05 143.280   1
  -1  -4 -10 82.2428 26.3234   4
   1   4  10 82.4608 38.2597   3
  -1   4 -10 173.088 62.0510   1
   1  -4  10 133.262 49.1056   2
  -1  -4 -10 118.683 27.5248   8
   1  -4  10 136.753 58.8749   1
   1  -4  10 176.258 57.6401   6
   1  -4  11 8.72173 30.6383   6
   1  -4  11 20.5589 38.6407   1
  -1   4 -11 6.84867 25.9840   1
  -1  -4 -11 12.2726 24.4609   4
  -1  -4 -11-0.33293 10.0390   8
   1  -4  11 79.4401 48.2860   2
  -1  -4 -11 9.53057 21.6495   6
   1   4  11 2.21944 29.6335   2
   1   4  11 19.3357 24.0559   3
  -1  -4 -11 84.2383 46.3779   3
  -1   4 -11 12.4814 33.4399   2
  -1  -4 -12 797.754 104.494   6
  -1  -4 -12 701.281 68.5871   8
  -1  -4 -12 905.699 134.314   3
  -1  -4 -12 753.726 122.211   4
   1  -4  12 845.991 140.176   2
   1   4  12 800.630 119.299   4
   1   4  12 855.027 128.579   3
  -1   4 -12 896.664 135.380   2
   1  -4  12 787.786 144.590   1
   1   4  12 818.895 125.852   2
  -1   4 -12 834.799 145.476   1
   1  -4  12 888.500 123.826   6
   1  -4  13 5655.25 224.616   5
   1   4  13 5796.30 343.211   4
   1  -4  13 5521.35 381.007   1
   1   4  13 6142.19 353.648   3
   1   4  13 6175.45 358.874   2
  -1   4 -13 5653.21 360.400   2
   1  -4  13 5782.43 329.959   6
   1  -4  13 5642.00 372.475   2
  -1   4 -13 6008.32 401.005   1
  -1  -4 -13 5741.52 291.177   6
  -1  -4 -13 5397.44 206.614   8
  -1  -4 -13 5960.21 358.163   3
  -1  -4 -13 5893.54 352.880   4
  -1  -4 -14 5785.96 223.556   8
   1  -4  14 6373.34 231.259   5
   1   4  14 6254.43 366.907   4
  -1   4 -14 6294.93 394.696   2
  -1   4 -14 6751.00 386.828   3
  -1  -4 -14 6481.21 384.387   3
   1  -4  14 6467.25 431.049   1
   1   4  14 6260.51 376.023   2
  -1  -4 -14 6233.87 311.076   6
   1  -4  14 7202.84 377.433   6
  -1  -4 -14 6287.93 377.241   4
  -1   4 -15 133.769 60.9872   2
   1  -4  15 112.364 69.6980   1
   1   4  15 46.2467 32.0830   4
  -1   4 -15 227.739 82.2451   3
   1  -4  15 115.465 36.5759   6
  -1  -4 -15 160.944 40.0293   8
  -1  -4 -15 101.338 61.7789   3
  -1  -4 -15 150.052 47.3883   6
  -1  -4 -15 195.183 75.6610   4
   1  -4  15 126.024 29.4458   5
  -1  -4 -16 1184.00 174.551   4
  -1  -4 -16 1061.42 99.5437   8
  -1   4 -16 1873.19 217.324   3
   1   4  16 1330.83 178.246   4
  -1   4 -16 1456.25 201.393   2
  -1  -4 -16 1143.24 176.571   3
  -1  -4 -16 1093.95 134.219   6
   1  -4  16 1328.09 83.4140   5
  -1  -4 -17 1820.33 135.386   8
  -1  -4 -17 2045.13 187.150   6
  -1  -4 -17 2073.14 239.853   3
  -1  -4 -17 1524.66 92.9103   5
  -1   4 -17 1961.07 229.407   3
  -1   4 -17 1906.24 237.113   2
   1   4  17 1647.26 205.314   4
   1   4  18 3604.79 313.466   4
   1  -4  18 3918.96 334.319   4
  -1  -4 -18 3465.84 251.211   6
  -1  -4 -18 3275.69 316.739   3
  -1   4 -18 4238.78 367.045   2
  -1   4 -18 3985.20 336.909   3
   1   4  19-12.6911 32.3614   4
  -1  -4 -19 22.7446 31.0170   6
   1  -4  19 76.2001 70.3127   4
  -1  -4 -19 43.3908 70.3276   3
  -1   4 -19 39.3992 38.7418   3
  -1   4 -19 36.5318 55.0009   2
  -1  -4 -20 174.795 66.1450   6
  -1  -4 -20 161.487 84.6970   3
  -1   4 -20 173.203 88.4440   2
   1   4  20 249.848 90.9384   4
  -1   4 -20 205.888 86.9997   3
   1  -4  20 391.610 121.612   4
  -1   4 -21 184.693 89.4596   3
  -1  -4 -21 119.595 45.0420   3
   1   4  21 73.1614 45.6823   4
   1  -4  21 130.054 77.2207   4
  -1  -4 -21 79.9654 43.3434   6
  -1  -4 -22 200.709 84.5969   3
   1  -4  22 120.508 64.5744   7
  -1   4 -22 140.164 92.4187   3
   1   4  22 100.721 61.5999   4
   1  -4  22 71.7631 58.0618   4
   1   4  23 60.0143 62.9280   4
   1  -4  23 107.798 58.8167   4
   1  -4  23 116.942 69.0933   7
   1  -4  24 34.4785 61.6696   7
   1  -4  24-19.2106 75.5529   4
   1   4  24 111.666 79.2596   4
  -1  -5  24 285.215 125.420   4
  -1   5  24 149.837 89.6911   4
  -1  -5  23 416.671 119.536   4
  -1   5  23 702.643 177.096   4
   1   5 -23 418.483 124.978   3
  -1   5  22 2290.54 301.425   4
  -1  -5  22 2386.86 317.913   4
   1   5 -22 2589.24 292.780   3
   1  -5 -22 2636.72 309.734   3
   1  -5 -21 1742.86 246.969   3
   1   5 -21 1388.08 208.334   3
  -1  -5  21 1624.41 256.455   4
  -1   5  21 1693.94 257.324   4
  -1   5  20 1055.91 198.127   4
   1   5 -20 922.034 175.528   3
  -1  -5  20 1008.65 194.592   4
   1  -5 -20 1226.41 204.246   3
   1  -5 -19 2877.61 300.711   3
   1  -5 -19 2996.72 191.652   6
  -1   5  19 2825.23 307.236   4
   1   5 -19 2096.49 268.343   2
   1   5 -19 2420.82 263.625   3
  -1   5  18 5535.47 424.851   4
   1   5 -18 5406.35 402.946   2
   1  -5 -18 4704.65 208.058   5
  -1  -5  18 6099.69 480.611   1
   1  -5 -18 5803.36 409.607   3
   1   5 -18 5301.90 380.031   3
   1  -5 -18 5837.37 267.153   6
  -1  -5  17 417.413 128.993   1
  -1   5  17 269.960 102.490   4
   1  -5 -17 374.053 61.1740   5
   1  -5 -17 426.076 109.804   3
   1  -5 -17 377.141 66.3650   6
   1   5 -17 429.543 113.285   2
   1   5 -17 352.477 88.7603   3
   1   5 -16 264.727 82.7317   3
   1   5 -16 239.941 84.8412   2
   1  -5 -16 346.705 61.6175   6
  -1  -5  16 227.944 71.0747   6
  -1   5  16 246.674 91.7501   4
   1  -5 -16 248.662 83.7351   3
   1  -5 -16 327.611 62.2712   5
  -1  -5  16 339.475 114.927   1
   1  -5 -15 9596.09 333.034   6
  -1   5  15 9224.42 507.707   4
   1   5 -15 9171.59 484.578   2
  -1  -5  15 9988.96 451.829   6
   1  -5 -15 9675.13 489.498   3
  -1  -5  15 10164.7 577.845   1
   1  -5 -14 4325.79 311.645   3
  -1  -5  14 4557.60 370.955   1
   1  -5 -14 3914.95 323.436   4
  -1   5  14 3858.49 314.739   4
   1   5 -14 4516.93 321.737   2
   1  -5 -14 4023.28 206.841   6
  -1   5  13 4220.61 290.403   3
   1  -5 -13 4196.76 208.049   6
  -1  -5  13 4753.02 364.306   1
  -1   5  13 4607.78 337.506   4
   1  -5 -13 4379.62 304.150   3
   1   5 -13 5097.25 330.768   2
   1  -5 -13 4075.52 319.510   4
  -1  -5  13 4822.94 334.734   2
   1   5 -12 2815.76 269.189   1
  -1  -5  12 3057.63 256.313   2
   1   5 -12 2801.97 234.998   2
  -1   5  12 3227.44 272.679   4
  -1  -5  12 2687.71 264.712   1
   1  -5 -12 3303.30 257.376   3
   1  -5 -12 3018.58 264.497   4
  -1   5  12 3306.72 246.019   3
  -1  -5  11 1316.00 178.579   1
   1   5 -11 1420.06 162.419   2
   1  -5 -11 1155.93 149.316   3
   1  -5 -11 1257.05 165.286   4
   1   5 -11 1322.87 179.797   1
  -1  -5  11 1423.99 168.632   2
  -1   5  11 1319.09 150.777   3
  -1   5  11 1173.67 158.859   4
   1   5 -10 268.871 67.3680   2
   1  -5 -10 716.739 124.649   4
  -1   5  10 537.533 104.835   4
  -1  -5  10 282.086 74.5089   2
  -1   5  10 517.894 92.4977   3
   1   5 -10 314.164 86.5291   1
   1  -5 -10 626.900 106.507   3
   1   5  -9 1120.66 154.335   1
   1   5  -9 1060.53 128.425   2
  -1   5   9 1485.42 150.588   3
  -1  -5   9 1166.68 140.052   2
   1  -5  -9 1409.88 167.394   4
  -1   5   9 1527.22 171.338   4
   1   5  -8 44.1062 38.0548   1
   1  -5  -8 217.472 71.0130   4
  -1  -5   8 148.962 55.7514   2
  -1   5   8 163.343 50.9936   3
  -1   5   7 5254.26 272.275   3
  -1  -5   7 5659.87 288.936   2
   1   5  -7 5860.58 325.879   1
   1  -5  -7 5534.63 313.546   4
  -1  -5   6 3946.22 150.410   7
   1  -5  -6 4011.01 260.511   4
   1   5  -6 4101.37 260.783   1
   1   5  -6 4060.47 229.841   2
  -1   5   6 4252.84 238.243   3
  -1  -5   6 4303.78 238.529   2
   1   5  -5 1619.76 157.191   1
   1  -5  -5 2062.16 181.758   4
   1   5  -5 1703.75 142.044   2
  -1  -5   5 1795.21 147.192   2
  -1   5   5 1963.10 156.733   3
  -1  -5   5 1721.65 88.9658   7
  -1   5   4 67.1253 33.6436   3
   1  -5  -4 113.908 48.0174   4
   1   5  -4 280.197 54.2837   2
  -1  -5   4 258.627 54.6505   2
  -1  -5   4 250.564 32.4221   7
   1   5  -4 272.984 68.1972   1
  -1  -5   3 8293.94 200.719   7
  -1   5   3 8260.13 327.932   3
   1   5  -3 8139.17 337.695   1
  -1  -5   3 8549.30 310.187   2
   1   5  -3 8477.88 307.403   2
   1  -5  -3 8411.86 356.302   4
   1   5  -2 1995.25 157.199   1
  -1   5   2 2576.95 177.705   3
   1   5  -2 1813.17 96.0305   7
   1   5  -2 1953.72 138.192   2
   1  -5  -2 2525.69 186.434   4
  -1  -5   1 431.984 77.4774   4
   1  -5  -1 417.433 77.6729   4
   1   5  -1 398.376 70.2122   1
   1   5  -1 391.045 46.6757   7
  -1   5   1 438.351 66.7209   1
   1   5  -1 335.981 57.1229   2
  -1  -5   0 13147.1 428.178   4
   1   5   0 13311.3 416.970   3
   1   5   0 12884.0 406.577   1
   1   5   0 12698.1 371.883   2
   1   5   0 13019.0 318.019   7
   1  -5   0 11853.2 418.120   4
  -1   5   0 11459.6 369.773   1
   1  -5   1 259.284 61.1260   4
   1   5   1 202.834 39.8215   7
  -1   5  -1 255.045 53.8849   1
  -1  -5  -1 261.114 61.6246   4
   1   5   1 250.510 49.6256   8
   1   5   1 249.752 53.3623   1
   1   5   1 220.116 53.7532   3
   1  -5   2 4867.60 255.290   4
   1   5   2 5410.42 256.582   3
   1   5   2 5299.17 208.975   8
  -1   5  -2 4851.72 241.546   1
  -1  -5  -2 5111.34 260.451   4
   1  -5   2 5017.20 262.097   2
   1   5   2 5357.84 219.027   7
   1  -5   3 874.065 108.708   2
  -1   5  -3 733.302 97.8287   1
   1   5   3 1174.62 119.857   3
   1   5   3 1093.72 86.9464   8
   1  -5   3 712.708 97.0564   4
   1   5   3 1222.32 107.447   7
  -1  -5  -3 1173.49 123.794   4
   1   5   4 6344.19 287.323   3
   1   5   4 6238.95 204.898   8
   1  -5   4 6691.62 314.504   2
  -1   5  -4 6435.91 300.056   1
   1   5   4 6395.59 297.554   4
  -1  -5  -4 6303.13 296.508   4
   1   5   5 2371.31 110.031   8
   1   5   5 2136.40 169.294   3
   1   5   5 2082.21 170.795   4
   1  -5   5 1798.76 166.171   2
  -1  -5  -5 2210.88 175.933   4
  -1   5  -5 1944.73 169.380   1
   1  -5   6 810.262 48.0963   7
   1  -5   6 1141.35 137.680   2
  -1  -5  -6 972.889 119.476   4
  -1   5  -6 1124.61 136.493   1
   1   5   6 1054.25 122.523   3
  -1   5  -7 33.7811 32.0390   1
   1  -5   7 19.2927 29.7476   2
   1   5   7 99.3044 40.8306   3
  -1  -5  -7 39.7469 32.6214   4
   1  -5   7 45.8632 15.2691   7
   1   5   8 386.385 77.6708   3
   1  -5   8 515.442 97.0038   2
   1  -5   8 496.290 99.3580   1
  -1  -5  -8 350.968 76.5440   4
   1  -5   8 447.766 51.0814   7
  -1   5  -8 524.699 102.459   1
  -1  -5  -9 3259.65 238.310   4
   1  -5   9 3760.47 281.778   1
   1  -5   9 3765.20 163.077   7
  -1  -5  -9 3206.37 112.042   8
   1  -5   9 3813.50 273.162   2
  -1  -5  -9 3629.69 254.587   3
  -1   5  -9 4189.54 296.168   1
   1   5   9 3534.17 240.508   3
   1   5  10 6679.80 344.990   3
  -1   5 -10 7181.38 382.612   2
  -1   5 -10 7488.95 412.373   1
  -1  -5 -10 6445.40 350.790   4
   1   5  10 6460.29 343.964   4
   1  -5  10 7260.87 251.238   7
   1  -5  10 7638.30 417.520   1
  -1  -5 -10 6602.21 357.750   3
   1  -5  10 7399.38 396.798   2
   1  -5  11 323.228 58.7093   7
   1   5  11 441.729 91.5341   3
  -1  -5 -11 317.134 35.8312   8
  -1   5 -11 331.439 91.0165   1
   1  -5  11 354.997 80.5588   6
   1  -5  11 409.694 98.7930   2
   1   5  11 404.639 89.0843   4
  -1  -5 -11 336.633 80.7243   4
   1  -5  11 496.560 114.468   1
  -1  -5 -11 431.254 94.9574   3
  -1   5 -11 294.971 82.7766   2
  -1  -5 -12 1974.05 202.822   4
  -1  -5 -12 1634.24 85.9406   8
  -1   5 -12 1551.81 185.848   2
  -1   5 -12 1697.37 209.152   1
  -1  -5 -12 1892.35 168.909   6
   1   5  12 1778.05 190.446   4
   1  -5  12 1734.34 183.600   6
  -1  -5 -12 1943.08 204.438   3
   1   5  12 1928.24 193.985   3
   1  -5  12 1698.89 213.422   1
   1  -5  12 1601.26 196.070   2
  -1   5 -13 46.5905 35.5830   2
  -1  -5 -13 56.9778 25.0717   6
   1   5  13 29.4253 35.1671   4
  -1  -5 -13 70.6175 47.2206   3
  -1  -5 -13 80.6465 38.2265   4
   1  -5  13 175.289 67.0506   6
  -1  -5 -13 35.8261 11.0340   8
   1  -5  13 56.0991 43.8182   1
   1   5  13 42.2586 39.5700   2
  -1   5 -14 51.3762 50.8266   2
  -1  -5 -14 46.0796 16.2094   8
   1  -5  14 39.0930 37.0749   1
   1  -5  14 76.0292 33.7572   5
  -1  -5 -14 59.1538 41.9090   6
  -1  -5 -14 83.4961 48.7612   4
   1   5  14 71.1301 51.4028   4
  -1  -5 -14 55.2036 46.7323   3
  -1  -5 -15 3859.05 158.095   8
  -1  -5 -15 4774.46 282.774   6
   1  -5  15 5430.58 414.688   1
  -1  -5 -15 4455.73 337.252   4
  -1   5 -15 4563.70 354.277   2
   1  -5  15 4811.20 223.646   5
  -1  -5 -15 4582.79 345.712   3
   1   5  15 4433.39 329.015   4
  -1  -5 -16 3951.55 260.585   6
   1  -5  16 3880.60 191.010   5
   1   5  16 3735.88 308.843   4
  -1  -5 -16 3050.63 144.545   8
  -1   5 -16 4590.40 346.739   3
   1  -5  16 4633.45 397.763   1
  -1   5 -16 4660.82 363.747   2
  -1  -5 -16 3707.99 320.553   3
  -1   5 -17 1690.60 232.246   2
  -1   5 -17 1607.80 212.593   3
   1   5  17 1241.89 183.049   4
  -1  -5 -17 1352.99 156.354   6
  -1  -5 -17 1269.83 196.286   3
   1  -5  17 1328.88 101.082   5
  -1  -5 -18 130.198 53.8020   6
  -1   5 -18 271.933 94.2023   2
  -1  -5 -18 140.514 84.8059   3
   1  -5  18 175.981 66.0629   7
  -1   5 -18 235.157 87.9551   3
   1   5  18 149.812 69.0469   4
  -1   5 -19 34.1736 34.7541   2
   1   5  19 88.6993 61.7420   4
  -1  -5 -19 54.8531 32.3475   6
   1  -5  19 71.3353 53.4742   7
  -1   5 -19 158.086 82.2619   3
  -1  -5 -19 16.1765 55.4629   3
   1  -5  20 562.427 114.377   7
  -1  -5 -20 625.686 142.025   3
  -1   5 -20 713.910 159.711   2
  -1   5 -20 564.982 142.375   3
  -1  -5 -20 473.489 96.9350   6
   1   5  20 581.046 136.476   4
   1  -5  20 511.089 132.198   4
  -1  -5 -21 454.338 93.0779   6
  -1   5 -21 303.431 116.494   2
   1  -5  21 473.591 133.514   4
   1  -5  21 374.383 97.7360   7
  -1  -5 -21 476.447 139.118   3
  -1   5 -21 461.946 130.885   3
   1   5  21 379.092 114.001   4
   1  -5  22 10.6934 31.5511   7
   1  -5  22 83.5405 61.4152   4
   1   5  22 72.1763 68.8053   4
   1   5  23 1660.61 241.457   4
   1  -5  23 1403.33 238.788   4
   1  -5  24 412.140 128.144   4
   1   5  24 508.584 150.427   4
  -1  -6  23 60.3997 102.767   4
  -1   6  23 139.023 89.5936   4
  -1  -6  22-17.8862 56.8257   4
  -1   6  22-23.8630 80.0274   4
   1   6 -22 6.54275 34.2131   3
   1  -6 -22 57.8518 55.2385   3
  -1   6  21 667.407 163.498   4
   1  -6 -21 418.215 115.780   3
   1   6 -21 380.457 116.118   3
  -1   6  20-35.2897 61.6848   4
   1   6 -20 137.781 71.0609   2
   1   6 -20 8.93998 44.6119   3
   1  -6 -20 3.08363 50.3821   3
  -1  -6  20 83.0456 67.5700   1
  -1   6  19 101.306 74.3717   4
  -1  -6  19 316.746 128.410   1
   1  -6 -19 75.6013 74.7773   3
   1   6 -19 175.958 82.1569   2
   1   6 -19 215.812 88.2397   3
   1   6 -18 376.063 101.174   3
   1   6 -18 498.123 123.546   2
  -1   6  18 383.773 110.832   4
   1  -6 -18 500.641 126.945   3
   1  -6 -18 593.985 83.8814   6
   1  -6 -18 534.480 81.2008   5
  -1  -6  18 451.416 136.835   1
   1   6 -17 2042.20 233.619   3
   1  -6 -17 1825.38 234.865   3
   1  -6 -17 1827.02 157.444   5
  -1   6  17 1732.95 236.142   4
   1  -6 -17 2076.18 161.623   6
  -1  -6  17 2293.74 294.642   1
   1   6 -17 2464.28 270.124   2
  -1  -6  16 1683.73 246.447   1
   1   6 -16 1877.17 231.599   2
   1  -6 -16 1656.01 217.490   3
  -1   6  16 1274.97 195.878   4
   1  -6 -16 1484.52 134.860   6
   1   6 -15 1175.76 175.207   2
  -1   6  15 852.984 156.601   4
   1  -6 -15 1028.15 170.573   3
  -1  -6  15 1116.20 195.872   1
   1  -6 -15 921.748 105.985   6
  -1   6  14 82.9475 56.1471   4
   1   6 -14 198.542 74.4702   2
   1  -6 -14 112.818 61.6059   3
  -1  -6  14 276.561 98.0700   1
   1  -6 -14 1.74809 22.5973   6
  -1  -6  13 6347.87 437.167   1
   1  -6 -13 5822.84 371.471   3
  -1  -6  13 6735.47 410.402   2
   1   6 -13 6510.04 387.526   2
  -1   6  13 5570.42 384.359   4
   1  -6 -12 6844.74 393.452   3
   1   6 -12 8026.04 418.808   2
  -1   6  12 6659.67 409.542   4
  -1   6  12 6684.68 372.110   3
   1  -6 -12 6750.06 414.928   4
  -1  -6  12 7774.16 428.719   2
  -1  -6  12 7663.41 466.767   1
   1  -6 -11 13450.7 542.417   3
  -1  -6  11 12572.5 536.242   2
  -1   6  11 12806.2 558.599   4
  -1  -6  11 12012.3 576.906   1
  -1   6  11 13371.9 516.261   3
   1   6 -11 12460.7 582.160   1
   1   6 -11 11842.0 501.013   2
   1  -6 -11 12284.7 554.464   4
   1   6 -10 1060.41 140.813   2
  -1  -6  10 881.418 148.603   1
  -1   6  10 854.682 125.463   3
   1  -6 -10 695.302 127.821   4
   1  -6 -10 813.634 127.660   3
  -1   6  10 741.945 131.847   4
  -1  -6  10 925.693 137.732   2
   1   6 -10 996.037 154.849   1
   1   6  -9 9878.66 480.962   1
   1   6  -9 9819.58 425.124   2
  -1   6   9 10280.0 429.560   3
  -1   6   9 9763.88 463.598   4
  -1  -6   9 9859.28 491.278   1
   1  -6  -9 10714.4 460.174   3
  -1  -6   9 10185.7 449.543   2
   1  -6  -9 10299.3 482.565   4
   1  -6  -8 167.873 68.3352   4
  -1   6   8 139.874 49.4160   3
  -1  -6   8 139.199 46.8080   2
   1  -6  -8 127.620 54.5257   3
  -1  -6   8 194.662 36.7551   7
  -1   6   8 155.355 57.1459   4
   1   6  -8 170.497 53.8254   2
   1   6  -8 283.806 81.1320   1
   1   6  -7 285.130 74.8043   1
  -1  -6   7 229.707 34.7536   7
  -1  -6   7 185.827 60.5721   2
  -1   6   7 106.982 50.0384   3
   1  -6  -7 82.1776 45.9771   4
  -1  -6   6 4623.00 264.916   2
  -1  -6   6 4429.15 140.745   7
   1   6  -6 4794.34 298.535   1
  -1   6   6 4158.06 113.830   8
   1  -6  -6 4864.13 266.776   1
  -1   6   6 4970.63 275.944   3
   1  -6  -6 4872.40 304.901   4
  -1   6   5 1127.89 131.644   3
  -1  -6   5 1393.69 139.316   2
   1  -6  -5 1260.75 151.260   4
   1   6  -5 1323.31 151.641   1
  -1  -6   5 1157.30 65.8402   7
  -1   6   4 7842.76 345.876   3
   1   6  -4 8599.80 342.380   2
   1   6  -4 8402.80 376.551   1
  -1  -6   4 8160.70 337.999   2
   1  -6  -4 7994.88 380.514   4
  -1  -6   4 8073.00 191.761   7
   1  -6  -3 8236.60 378.518   4
  -1  -6   3 7446.35 315.751   2
   1   6  -3 7525.74 347.986   1
   1   6  -3 7440.13 314.131   2
  -1   6   3 8162.62 352.900   3
   1   6  -2 6611.41 288.791   2
   1   6  -2 6663.47 203.038   7
   1   6  -2 6751.54 318.619   1
   1  -6  -2 7957.97 364.945   4
  -1   6   2 7685.26 340.312   3
  -1  -6   2 6386.09 321.440   4
  -1  -6   1 17515.5 549.581   4
   1   6  -1 17305.6 380.720   7
  -1   6   1 16327.5 520.453   3
   1   6  -1 18129.3 535.198   1
   1   6  -1 17677.8 488.271   2
  -1   6   1 16773.4 489.646   1
   1  -6  -1 15883.0 539.559   4
   1   6   0 18446.2 551.432   3
   1   6   0 18479.7 538.089   1
   1  -6   0 20043.0 599.143   4
  -1   6   0 20841.3 548.325   1
   1   6   0 18125.4 415.356   7
  -1  -6   0 18014.7 564.157   4
   1   6   0 18247.4 502.718   2
   1   6   1 6408.04 279.843   2
  -1  -6  -1 6240.07 316.330   4
   1   6   1 6475.57 308.994   3
  -1   6  -1 7206.03 312.345   1
   1  -6   1 7148.72 339.208   4
   1   6   1 6595.21 242.185   7
   1   6   1 6473.00 300.008   1
  -1  -6  -2 9371.87 392.198   4
   1   6   2 9130.90 370.905   3
   1  -6   2 7314.89 351.659   4
  -1   6  -2 7358.82 329.475   1
   1   6   2 9745.14 315.558   7
   1   6   2 9829.16 318.875   8
  -1   6  -3 11.4615 28.9365   1
   1  -6   3 47.3652 32.2516   4
  -1  -6  -3 4.60214 24.1580   4
   1   6   3-17.9746 23.3059   3
   1  -6   3 44.9457 38.7027   2
   1   6   3-1.00540 16.9959   7
   1   6   3-8.15074 20.0861   8
   1   6   4 290.036 60.7676   7
   1   6   4 286.746 48.3113   8
   1   6   4 287.131 64.7980   3
  -1   6  -4 138.013 50.8216   1
   1  -6   4 170.397 61.4605   2
   1  -6   4 257.377 64.6675   4
  -1  -6  -4 353.298 78.8100   4
   1   6   5 3726.24 156.308   8
  -1   6  -5 3509.93 242.090   1
   1  -6   5 3464.92 245.700   2
   1   6   5 3668.71 235.715   3
  -1  -6  -5 3680.38 248.159   4
   1   6   6 3105.17 127.709   8
   1  -6   6 2749.61 231.561   1
  -1  -6  -6 3357.55 240.633   4
  -1   6  -6 2833.43 226.742   1
   1   6   6 3203.62 224.001   3
   1  -6   6 2784.56 225.217   2
   1  -6   7 2501.38 217.515   2
   1  -6   7 2463.24 227.347   1
  -1   6  -7 2542.40 221.834   1
   1   6   7 2588.23 214.435   4
   1   6   7 2474.48 201.423   3
  -1  -6  -7 2621.37 217.054   4
  -1   6  -7 2599.57 220.156   2
  -1  -6  -8 3294.23 248.399   3
   1  -6   8 2798.88 103.143   7
  -1  -6  -8 3314.32 249.873   4
  -1   6  -8 3534.55 262.978   2
  -1   6  -8 3594.74 272.989   1
   1  -6   8 3630.95 282.813   1
   1   6   8 3289.17 247.011   4
   1  -6   8 3466.17 264.804   2
   1   6   8 3238.22 237.246   3
  -1  -6  -9 1696.87 185.189   3
   1  -6   9 1361.11 84.6890   7
   1   6   9 1750.83 175.928   3
  -1   6  -9 1517.86 176.922   2
   1  -6   9 1578.36 192.041   1
   1   6   9 1885.68 189.628   4
  -1   6  -9 1587.66 189.440   1
  -1  -6  -9 1577.53 176.378   4
   1  -6   9 1528.87 180.817   2
  -1   6 -10 295.286 89.3709   1
   1  -6  10 182.824 35.4778   7
   1   6  10 197.125 60.7781   3
  -1  -6 -10 250.252 75.3717   3
  -1   6 -10 175.679 61.6813   2
   1   6  10 253.808 75.1757   4
   1  -6  10 193.687 74.8577   2
  -1  -6 -10 143.090 60.4954   4
   1  -6  10 248.086 81.5945   1
   1  -6  11 3194.69 163.134   7
  -1  -6 -11 4302.10 304.928   4
   1  -6  11 3771.22 303.697   2
  -1   6 -11 3346.23 294.609   1
   1   6  11 4281.92 291.956   3
  -1   6 -11 3551.95 285.804   2
  -1  -6 -11 4595.39 318.044   3
   1  -6  11 3148.91 289.418   1
   1   6  11 4158.47 297.665   4
   1   6  12 200.356 71.2834   4
  -1  -6 -12 92.4678 46.9494   4
   1  -6  12 181.828 46.8067   7
  -1  -6 -12 91.5006 55.1858   3
  -1   6 -12 264.133 88.2615   2
   1  -6  12 117.803 66.0196   1
   1  -6  12 157.408 58.4598   6
  -1   6 -13 7342.15 436.903   2
  -1  -6 -13 9167.43 483.390   3
   1   6  13 8834.21 459.581   4
   1  -6  13 6943.66 286.303   7
  -1  -6 -13 8947.22 467.513   4
   1  -6  13 7340.27 482.814   1
  -1   6 -14 5560.09 386.412   2
   1  -6  14 5108.11 408.079   1
  -1  -6 -14 4711.04 350.793   4
   1  -6  14 4521.17 240.494   7
   1   6  14 4826.66 346.877   4
  -1  -6 -14 4585.86 286.042   6
  -1  -6 -14 4855.54 363.627   3
   1  -6  15 2914.36 314.038   1
   1   6  15 3539.83 303.496   4
  -1  -6 -15 3507.03 310.911   3
  -1  -6 -15 3557.14 253.855   6
   1  -6  15 2676.03 195.124   7
  -1   6 -15 2750.67 283.591   2
   1  -6  16 911.754 106.743   5
   1  -6  16 712.221 108.257   7
  -1   6 -16 939.834 167.188   2
  -1  -6 -16 866.726 127.029   6
  -1  -6 -16 1071.51 179.681   3
   1  -6  16 1162.76 207.101   1
   1   6  16 827.352 148.474   4
  -1   6 -17 346.371 106.322   2
  -1  -6 -17 320.431 72.4205   6
   1  -6  17 458.764 127.258   1
   1  -6  17 391.067 69.1530   5
  -1   6 -17 399.945 110.887   3
   1   6  17 286.911 93.7567   4
  -1  -6 -17 460.484 123.162   3
   1  -6  17 406.498 86.4835   7
   1  -6  18 335.723 122.078   1
  -1  -6 -18 223.001 66.0198   6
   1   6  18 166.099 72.4482   4
  -1   6 -18 153.499 53.1006   3
   1  -6  18 133.516 64.6949   7
  -1  -6 -18 262.446 90.9671   3
  -1   6 -18 222.608 92.4972   2
   1  -6  19 90.7534 43.3205   7
  -1   6 -19 200.914 95.5004   2
  -1  -6 -19 132.669 61.4702   3
  -1   6 -19 215.293 89.3605   3
   1   6  19 101.098 50.3188   4
  -1  -6 -19 107.535 50.2813   6
  -1   6 -20 1148.42 214.135   2
  -1  -6 -20 1287.67 159.764   6
   1  -6  20 1189.35 158.736   7
   1   6  20 1330.82 207.746   4
  -1   6 -20 1387.75 218.447   3
  -1  -6 -20 1421.47 229.653   3
  -1   6 -21 128.996 87.3144   2
  -1   6 -21 197.034 88.7817   3
   1   6  21 351.639 111.365   4
  -1  -6 -21 441.336 130.357   3
   1   6  22 1705.20 249.141   4
   1  -6  22 1476.54 250.455   4
   1  -6  23 131.778 70.3001   4
   1   6  23 163.929 88.6164   4
  -1   7  22 223.480 109.315   4
   1   7 -21 483.822 141.772   2
   1  -7 -21 477.634 142.133   3
  -1   7  21 420.916 145.414   4
  -1  -7  21 483.110 164.649   1
   1   7 -21 217.980 79.6645   3
  -1   7  20 705.716 171.792   4
   1  -7 -20 687.142 160.738   3
   1   7 -20 744.158 167.965   2
  -1  -7  20 576.553 169.742   1
   1   7 -20 665.506 144.773   3
   1  -7 -19 100.926 72.3820   3
   1   7 -19-66.0629 71.1570   3
  -1   7  19 53.0005 62.8500   4
   1   7 -19 78.2653 32.4088   2
  -1  -7  19-14.8097 69.8946   1
  -1   7  18 432.045 130.498   4
  -1  -7  18 592.312 161.919   1
   1  -7 -18 562.341 147.915   3
   1  -7 -18 250.126 65.2023   5
   1  -7 -18 453.658 80.7314   6
   1   7 -18 582.781 137.599   2
   1   7 -17 1150.21 189.021   2
  -1  -7  17 1319.39 230.210   1
   1  -7 -17 1380.02 137.860   6
  -1   7  17 1552.44 231.989   4
   1  -7 -17 1462.24 214.264   3
   1  -7 -16 1412.89 206.669   3
   1  -7 -16 1430.91 140.560   6
   1   7 -16 1570.38 210.703   2
  -1   7  16 1386.39 210.018   4
  -1  -7  16 1671.57 253.137   1
  -1   7  15-8.10484 46.1281   4
   1   7 -15 142.390 69.0647   2
  -1  -7  15 89.2022 69.5104   1
   1  -7 -15 36.7447 33.5134   3
   1  -7 -15 5.97765 20.3977   6
  -1  -7  14 572.112 144.422   1
  -1   7  14 940.492 166.069   4
   1   7 -14 624.130 130.564   2
   1  -7 -14 864.016 151.601   3
   1  -7 -13 266.375 86.1921   3
  -1  -7  13 387.652 114.293   1
  -1   7  13 399.782 109.969   4
   1   7 -13 432.092 104.222   2
  -1   7  12 1630.77 209.471   4
   1  -7 -12 1694.38 204.953   3
  -1  -7  12 1803.26 211.134   2
   1   7 -12 1705.38 197.174   2
  -1  -7  12 1747.45 230.250   1
   1   7 -11 7790.33 414.726   2
   1  -7 -11 7595.79 427.166   3
  -1  -7  11 7345.33 415.856   2
  -1  -7  11 6956.39 252.326   7
  -1  -7  11 7380.34 467.770   1
  -1   7  11 8141.80 458.875   4
  -1   7  10 4522.00 299.799   3
  -1  -7  10 3586.93 161.066   7
   1   7 -10 4257.09 334.005   1
   1   7 -10 3881.78 283.592   2
   1  -7 -10 4237.16 308.602   3
  -1  -7  10 3854.50 326.725   1
  -1  -7  10 3811.41 289.531   2
   1  -7 -10 4748.58 345.403   4
  -1   7  10 4264.18 324.682   4
   1   7  -9 606.911 122.540   1
  -1   7   9 577.483 119.721   4
   1  -7  -9 720.660 122.853   3
  -1  -7   9 731.669 137.983   1
  -1  -7   9 682.175 120.214   2
   1   7  -9 703.479 116.093   2
  -1   7   9 649.998 109.952   3
   1  -7  -9 545.441 121.242   4
  -1  -7   9 587.670 56.6224   7
   1  -7  -8 2456.04 211.579   1
  -1   7   8 2446.67 234.141   4
  -1  -7   8 2229.95 205.973   2
   1  -7  -8 2225.86 214.352   3
   1   7  -8 2367.24 207.938   2
   1   7  -8 2411.85 236.150   1
   1  -7  -8 2414.29 236.468   4
  -1  -7   8 2149.32 232.613   1
  -1  -7   8 1910.26 89.2081   7
  -1   7   8 2422.55 212.985   3
  -1   7   7 5791.96 323.494   3
   1   7  -7 4732.76 321.635   1
  -1  -7   7 5177.43 350.944   1
   1  -7  -7 5500.18 309.646   1
   1   7  -7 4809.39 292.980   2
  -1   7   7 5561.41 348.707   4
   1  -7  -7 5598.41 354.208   4
   1  -7  -7 5552.05 333.109   3
  -1  -7   7 4870.08 297.649   2
  -1  -7   6 9.19263 5.72558   7
  -1   7   6 17.3135 12.2071   8
  -1   7   6 52.7086 48.6054   4
  -1  -7   6 45.5963 41.0817   2
   1  -7  -6 13.8021 34.5519   4
   1   7  -6 20.2023 34.3865   1
  -1   7   6 18.0427 29.1235   3
   1  -7  -6 6.47716 27.3694   1
   1   7  -5 3671.22 266.441   1
  -1   7   5 3102.17 233.340   3
  -1  -7   5 3782.13 248.385   2
   1  -7  -5 3454.40 269.809   4
   1  -7  -5 3092.94 226.288   1
   1  -7  -4 47.2768 25.7461   1
   1  -7  -4 30.5834 36.6233   4
  -1   7   4 90.7552 34.0183   3
   1   7  -4 198.016 63.0258   1
  -1  -7   4 119.424 48.9112   2
  -1  -7   3 1422.88 161.639   4
   1  -7  -3 1571.29 175.042   4
   1   7  -3 1436.27 158.733   1
   1  -7  -3 1524.91 156.351   1
  -1   7   3 1674.98 170.129   3
   1   7  -2 4455.35 274.791   1
   1  -7  -2 3650.58 245.694   1
  -1   7   2 3925.75 263.578   2
   1   7  -2 4161.05 161.527   7
  -1   7   2 3587.35 251.808   3
  -1  -7   2 4133.27 277.224   4
   1  -7  -2 4187.13 283.856   4
   1   7  -1 404.341 54.8957   7
   1  -7  -1 210.514 71.2695   4
  -1   7   1 164.867 53.1650   3
  -1   7   1 107.476 39.5641   1
   1   7  -1 423.271 80.8836   2
   1  -7  -1 148.242 49.2072   1
   1   7  -1 476.718 89.9802   1
  -1  -7   1 393.977 86.1269   4
  -1   7   1 181.374 58.0993   2
   1  -7   0 338.992 73.8795   1
  -1   7   0 257.099 62.9080   1
   1   7   0 331.890 73.1253   3
  -1   7   0 161.204 55.5654   2
   1  -7   0 300.831 76.8045   4
  -1  -7   0 385.641 84.3924   4
   1   7   0 286.290 63.0197   2
   1   7   0 318.310 51.9128   7
   1   7   0 344.986 74.8843   1
   1  -7   1 7702.92 371.495   1
   1   7   1 7061.02 348.045   3
   1   7   1 7016.80 266.106   7
   1  -7   1 7888.30 389.695   4
   1   7   1 6954.60 338.355   1
   1   7   1 6742.61 315.750   2
  -1   7  -1 7861.61 354.533   1
  -1   7  -1 8235.71 385.497   2
  -1  -7  -1 6614.80 355.283   4
  -1   7  -1 7727.61 181.485   7
  -1  -7  -2 134.823 57.6079   4
   1  -7   2 85.3788 37.9152   4
  -1   7  -2 107.390 43.4997   1
   1   7   2 113.439 42.8965   7
  -1   7  -2 82.5122 45.4582   2
   1   7   2 144.852 45.9129   8
   1  -7   2 128.009 53.8281   1
   1   7   2 166.242 56.7271   3
   1   7   3 507.236 77.5710   7
   1  -7   3 779.368 118.630   1
   1   7   3 570.029 98.2092   3
   1  -7   3 914.209 128.659   4
  -1   7  -3 980.059 134.384   2
  -1  -7  -3 542.736 101.642   4
   1   7   3 494.458 71.6806   8
  -1   7  -3 992.800 129.815   1
  -1   7  -4 33.2426 19.2155   1
   1   7   4 10.8562 23.6110   4
   1   7   4 5.74363 20.4122   7
   1  -7   4 19.4170 29.2996   4
   1  -7   4 43.1765 42.1509   2
   1  -7   4 5.98490 34.1317   1
   1   7   4 14.1630 17.0075   8
  -1   7  -4 98.8175 57.8499   2
  -1  -7  -4 43.5837 40.0436   4
   1   7   4 33.9487 42.0647   3
  -1  -7  -5 695.533 118.027   4
   1  -7   5 587.403 105.887   4
   1   7   5 677.654 109.996   3
   1   7   5 591.860 93.3289   7
   1   7   5 653.944 71.4159   8
   1  -7   5 616.833 112.221   1
   1   7   5 568.283 102.836   4
  -1   7  -5 646.915 110.804   1
  -1   7  -5 701.229 117.634   2
   1  -7   5 611.675 108.322   2
  -1   7  -6 153.412 58.6414   2
   1   7   6 104.959 48.4786   4
  -1   7  -6 205.213 70.1327   1
   1  -7   6 139.460 56.8368   2
  -1  -7  -6 128.255 57.6076   4
   1  -7   6 101.928 47.0935   1
   1   7   6 94.8408 25.7196   8
  -1  -7  -6 110.067 48.9417   1
   1   7   6 89.7322 39.5855   3
  -1  -7  -6 143.628 55.5334   3
  -1  -7  -7 376.839 90.5227   3
   1  -7   7 327.638 87.8861   1
   1   7   7 365.537 41.6753   8
   1   7   7 378.043 84.5723   3
  -1   7  -7 360.733 88.5465   1
   1  -7   7 397.933 95.0731   2
  -1  -7  -7 460.913 94.0327   1
  -1   7  -7 352.926 86.1046   2
  -1  -7  -7 430.197 94.8217   4
   1   7   7 400.149 89.1420   4
   1  -7   8 6531.74 403.548   1
  -1  -7  -8 5944.57 357.151   3
  -1   7  -8 6811.08 394.740   1
  -1   7  -8 6709.77 384.941   2
  -1  -7  -8 5453.63 345.456   4
  -1  -7  -8 6161.29 350.350   1
   1  -7   8 6592.76 385.696   2
   1   7   8 6062.46 360.447   4
   1   7   8 5788.89 339.219   3
   1  -7   9 359.963 97.1549   2
   1   7   9 359.934 88.3620   3
  -1   7  -9 366.084 90.7438   1
   1   7   9 454.220 102.959   4
  -1  -7  -9 399.410 97.3271   4
  -1   7  -9 471.345 112.796   2
   1  -7   9 357.129 96.4065   1
  -1  -7  -9 399.756 96.7464   3
   1  -7  10 12469.1 588.889   1
   1  -7  10 12087.5 551.537   2
  -1  -7 -10 13272.8 560.675   4
  -1  -7 -10 12854.9 553.941   3
  -1   7 -10 12105.2 545.961   2
   1   7  10 12592.7 539.782   4
  -1   7 -10 12420.0 570.617   1
   1  -7  11 54.2182 17.2226   7
  -1  -7 -11 85.5848 52.9472   4
  -1  -7 -11 71.8796 46.9008   3
  -1   7 -11 58.2582 44.2402   2
   1   7  11 44.3898 33.6502   4
   1  -7  11-33.5850 41.4500   1
  -1  -7 -12 716.019 140.342   3
  -1   7 -12 1092.85 179.056   2
   1   7  12 670.629 132.750   4
   1  -7  12 927.163 82.2826   7
   1  -7  12 1094.85 181.356   1
  -1  -7 -12 670.893 128.845   4
  -1   7 -13 2538.42 267.246   2
  -1  -7 -13 2431.32 255.499   3
   1  -7  13 2623.84 291.303   1
   1   7  13 2297.67 244.117   4
   1  -7  13 2204.28 140.104   7
   1  -7  14 10729.3 610.818   1
   1   7  14 11084.9 553.218   4
  -1   7 -14 10384.5 558.934   2
  -1  -7 -14 11778.7 585.589   3
   1  -7  14 8704.82 315.495   7
  -1  -7 -15 318.426 80.5169   6
  -1  -7 -15 386.560 107.864   3
   1   7  15 507.754 129.671   4
   1  -7  15 266.435 105.515   1
   1  -7  15 263.847 58.3827   7
  -1   7 -15 353.555 107.862   2
  -1  -7 -16 790.696 159.301   3
   1  -7  16 1002.90 195.692   1
   1  -7  16 928.527 118.397   7
  -1   7 -16 1101.52 193.212   2
   1   7  16 962.349 166.857   4
  -1  -7 -16 889.996 133.246   6
   1  -7  17 94.0766 45.1239   7
  -1   7 -17 46.0472 59.1143   2
   1  -7  17 54.3595 40.1942   5
   1  -7  17 128.343 80.0641   1
   1   7  17 105.935 53.5142   4
  -1  -7 -17 58.6012 43.0810   3
  -1  -7 -17 50.4342 37.3549   6
  -1   7 -18 62.3278 56.2404   2
  -1  -7 -18 59.8192 47.9984   6
   1   7  18-5.45271 43.9537   4
   1  -7  18 62.4156 38.8142   1
  -1   7 -18-5.77264 40.5238   3
  -1  -7 -18 62.3195 59.3968   3
   1  -7  18 40.5736 27.1885   7
  -1  -7 -19 43.5321 37.9225   6
  -1   7 -19 69.7442 54.5452   3
   1  -7  19 106.965 72.6621   1
  -1  -7 -19 106.172 90.9296   3
   1   7  19 139.813 77.5744   4
  -1   7 -19 127.736 59.5020   2
  -1  -7 -20 146.680 102.226   3
  -1   7 -20 38.8048 65.5853   2
   1   7  20-2.84874 43.5976   4
  -1   7 -20 78.4259 52.1204   3
   1   7  21 209.626 92.2278   4
   1   7  22 159.366 84.9761   4
   1  -7  23 380.518 135.266   4
  -1   8  21 732.463 181.584   4
   1   8 -20 203.044 85.4061   2
   1  -8 -20 148.514 74.3020   3
  -1   8  20 207.601 106.167   4
  -1  -8  20 104.033 66.4039   1
   1   8 -20 161.741 84.8399   3
  -1  -8  19 640.665 179.425   1
   1  -8 -19 680.272 163.086   3
  -1   8  19 712.067 177.450   4
   1   8 -19 524.963 147.310   2
   1   8 -18-11.2796 39.9950   2
  -1   8  18 35.2273 45.2180   4
   1  -8 -18 50.1815 47.6910   3
  -1  -8  18 84.4272 60.4801   1
  -1   8  17 146.618 83.3425   4
  -1  -8  17 175.171 100.149   1
   1   8 -17 190.101 89.1923   2
   1  -8 -17 186.329 86.3896   3
   1  -8 -17 125.320 50.2692   6
  -1  -8  16-67.9938 81.6423   1
   1  -8 -16-21.1246 35.4547   6
  -1   8  16-6.66702 47.9148   4
   1   8 -16-5.19084 32.6438   2
   1  -8 -16 5.51095 53.6232   3
  -1   8  15 116.325 80.7357   4
  -1  -8  15-19.3256 57.9302   1
   1  -8 -15 64.2559 64.7230   3
   1   8 -15 98.8447 53.6898   2
   1  -8 -14 1125.54 183.921   3
  -1  -8  14 874.304 93.5992   7
  -1   8  14 902.004 171.571   4
   1   8 -14 827.916 150.004   2
  -1  -8  14 879.316 178.633   1
  -1  -8  13 752.366 79.0741   7
  -1   8  13 578.898 136.776   4
   1   8 -13 825.247 147.566   2
   1  -8 -13 741.140 149.025   3
  -1  -8  13 870.284 170.942   1
   1  -8 -12 171.537 77.3019   3
   1   8 -12 212.046 76.7744   2
  -1  -8  12 174.352 77.9089   1
  -1   8  12 188.282 78.8682   4
  -1  -8  12 148.857 33.0141   7
   1  -8 -11 138.851 62.1277   3
  -1  -8  11 123.024 63.7298   1
  -1   8  11 175.244 84.2333   4
   1   8 -11 125.175 61.0330   2
  -1  -8  11 98.6020 23.7922   7
   1  -8 -10 603.768 130.827   3
  -1   8  10 600.390 131.130   4
   1  -8 -10 560.859 115.480   1
  -1  -8  10 506.504 126.794   1
   1   8 -10 826.693 135.140   2
  -1  -8  10 588.932 117.844   2
   1  -8  -9 96.1753 51.1213   1
  -1  -8   9 38.0525 50.9260   1
  -1   8   9 302.741 95.1161   4
   1   8  -9 148.827 64.5061   2
  -1  -8   9 66.6276 47.4778   2
   1  -8  -9 169.738 56.4290   3
  -1  -8   8 101.058 50.2431   2
  -1   8   8 263.042 78.6908   3
   1  -8  -8 204.204 71.8633   4
   1  -8  -8 366.490 89.3183   1
   1   8  -8 167.434 60.3826   2
  -1   8   8 221.081 84.2433   4
  -1  -8   8 169.403 69.4337   1
   1  -8  -7 1697.83 206.896   4
   1   8  -7 1846.01 209.565   1
  -1  -8   7 1618.61 181.210   2
   1   8  -7 1836.55 188.224   2
  -1   8   7 1633.09 200.376   4
  -1   8   7 1145.47 58.0864   8
   1  -8  -7 1573.61 177.195   1
  -1   8   7 1369.16 166.036   3
  -1  -8   7 1597.17 206.824   1
   1   8  -6 486.859 98.0074   2
  -1  -8   6 529.957 118.180   1
   1   8  -6 445.280 102.160   1
  -1   8   6 430.590 106.743   4
  -1   8   6 343.253 46.2007   8
  -1   8   6 407.129 89.7890   3
  -1  -8   6 446.761 93.5032   2
   1  -8  -6 315.871 87.1104   4
   1  -8  -6 322.081 83.1187   1
   1  -8  -5 206.325 76.8120   4
  -1  -8   5 160.467 66.2880   1
  -1   8   5 103.243 43.6569   4
  -1   8   5 134.027 53.0637   3
   1  -8  -5 119.714 51.7951   1
   1   8  -5 220.110 74.9941   1
   1   8  -5 168.052 59.2080   2
  -1  -8   5 86.5251 38.7438   2
  -1   8   4 1704.51 195.211   4
  -1  -8   4 1446.67 178.587   4
   1  -8  -4 1468.07 183.645   4
   1   8  -4 1401.14 156.864   2
   1   8  -4 1614.59 180.344   1
  -1  -8   4 1406.67 180.705   1
   1  -8  -4 1392.13 163.962   1
  -1   8   4 1779.38 185.485   3
   1  -8  -3 298.853 86.4811   4
   1  -8  -3 216.583 67.2575   1
   1   8  -3 265.498 73.7942   1
  -1  -8   3 208.027 70.4333   4
  -1   8   3 286.244 78.3695   3
  -1   8   3 220.594 68.8370   4
  -1  -8   3 290.963 82.8434   1
  -1   8   2 16.2728 32.0829   3
  -1  -8   2 13.5683 36.3111   4
   1  -8  -2 39.7730 40.4206   1
   1  -8  -2 36.0128 35.3540   4
  -1   8   2 72.7393 55.5304   4
  -1  -8   2 11.4336 33.7515   1
   1   8  -2 51.0910 21.0084   7
   1   8  -2 68.3446 41.7776   1
  -1   8   2 51.8095 36.2171   2
   1   8  -1-7.88451 33.3458   3
  -1  -8   1 5.60488 30.3864   1
   1   8  -1-13.0705 16.3724   7
   1  -8  -1 46.6250 40.2548   4
  -1  -8   1 63.3239 44.5481   4
  -1   8   1 60.0492 30.1036   3
  -1   8   1 16.8857 18.9661   1
   1   8  -1-8.75307 28.4962   1
   1  -8  -1 110.009 52.0871   1
  -1   8   1 73.0792 32.7207   2
   1  -8   0 577.742 107.181   1
   1  -8   0 449.097 100.890   4
   1   8   0 551.972 101.718   3
  -1   8   0 500.151 90.8882   1
  -1   8   0 587.198 107.403   2
   1   8   0 575.738 70.6020   7
  -1  -8   0 583.455 112.490   4
   1   8   0 520.194 96.0379   1
  -1  -8   0 491.322 100.724   1
  -1   8  -1 1759.93 174.403   1
  -1   8  -1 1641.17 183.818   2
   1   8   1 1901.17 184.159   1
  -1  -8  -1 1816.31 197.939   4
   1  -8   1 1581.47 178.896   1
   1   8   1 2207.59 204.929   3
   1  -8   1 1871.67 200.146   4
  -1   8  -1 1417.19 73.4689   7
  -1  -8  -1 1784.64 191.905   1
   1   8   1 2003.52 142.610   7
  -1   8  -2 3227.84 258.840   2
  -1  -8  -2 3689.44 282.310   4
   1  -8   2 3521.41 275.146   4
   1   8   2 3879.89 213.088   7
  -1  -8  -2 3901.29 281.671   1
  -1   8  -2 3581.32 254.924   1
   1   8   2 4240.91 284.967   3
   1  -8   2 3358.50 268.317   1
   1   8   2 4273.25 238.425   8
   1   8   3 1698.22 148.392   7
  -1  -8  -3 1640.51 181.563   1
   1  -8   3 2075.86 213.800   1
   1   8   3 1657.40 181.124   3
   1   8   3 1606.98 139.238   8
   1  -8   3 1928.80 203.220   4
  -1   8  -3 1953.57 202.159   2
  -1  -8  -3 1837.81 200.684   4
  -1   8  -3 1917.47 190.401   1
   1  -8   4 627.031 119.629   4
  -1   8  -4 607.980 114.315   2
   1   8   4 786.470 102.579   7
  -1  -8  -4 772.596 130.840   4
  -1  -8  -4 639.173 117.779   1
  -1   8  -4 685.109 118.332   1
   1  -8   4 586.480 116.886   1
   1   8   4 722.699 89.2622   8
   1   8   4 701.172 119.583   3
  -1  -8  -5 903.500 135.695   1
   1  -8   5 830.239 135.558   2
  -1   8  -5 738.550 130.246   2
   1   8   5 895.284 90.5586   8
  -1   8  -5 620.363 109.624   1
   1   8   5 1066.59 144.919   3
  -1  -8  -5 765.143 133.364   4
   1   8   5 813.269 115.264   7
   1  -8   5 806.336 134.729   4
   1  -8   5 748.701 132.563   1
   1   8   5 792.714 131.987   4
  -1   8  -6 200.976 68.2246   1
  -1   8  -6 228.251 76.2748   2
  -1  -8  -6 338.355 83.3674   4
  -1  -8  -6 279.321 78.0647   1
   1   8   6 408.427 94.7255   3
   1   8   6 358.187 53.3855   8
   1  -8   6 170.954 63.0545   4
   1  -8   6 310.065 85.8501   2
   1  -8   6 211.429 72.0043   1
   1   8   6 397.796 95.5161   4
   1   8   6 287.101 73.7169   7
  -1   8  -7 3389.95 279.315   1
  -1  -8  -7 3333.20 266.280   1
   1  -8   7 3363.55 283.206   2
  -1  -8  -7 3375.62 281.107   3
  -1   8  -7 3109.65 269.699   2
  -1  -8  -7 3517.58 288.931   4
   1   8   7 3475.96 280.923   4
   1  -8   7 3561.99 304.224   1
   1  -8   7 3374.52 276.606   4
   1   8   7 3293.83 246.592   7
   1   8   7 3451.27 267.575   3
   1   8   7 3216.79 137.210   8
   1   8   8 480.103 109.668   4
  -1  -8  -8 410.458 103.138   4
  -1  -8  -8 451.635 100.479   1
  -1   8  -8 733.915 135.402   2
   1  -8   8 670.793 136.681   1
  -1   8  -8 776.160 138.595   1
  -1  -8  -8 548.043 118.036   3
   1  -8   8 644.447 127.896   2
   1   8   9 2812.67 260.876   4
  -1  -8  -9 2784.41 252.200   1
  -1   8  -9 3139.37 279.189   2
  -1  -8  -9 2884.81 271.600   3
   1  -8   9 2605.90 277.905   1
  -1  -8  -9 2867.83 268.488   4
  -1  -8 -10 66.3562 40.4080   1
   1   8  10 71.1945 39.4770   4
   1  -8  10-21.8321 38.4227   1
  -1   8 -10 130.671 72.3652   2
  -1  -8 -10 18.2931 44.8570   4
  -1  -8 -10 66.2846 41.6407   3
   1  -8  11 36.5573 54.3365   1
   1   8  11 10.9410 46.0805   4
  -1  -8 -11 72.2157 49.0122   3
  -1   8 -11 0.21826 47.5385   2
   1   8  12 1573.39 208.223   4
   1  -8  12 1505.20 227.193   1
  -1  -8 -12 1341.38 193.930   3
  -1   8 -12 1391.58 200.926   2
   1   8  13 2161.33 246.633   4
   1  -8  13 2400.16 287.724   1
  -1   8 -13 2030.72 247.707   2
  -1  -8 -13 2467.58 271.578   3
   1   8  14 41.4552 32.4614   4
   1  -8  14 4.12490 13.5092   7
  -1   8 -14 73.7899 52.4740   2
  -1  -8 -14 27.5857 42.4278   3
   1  -8  14-23.9730 55.5595   1
   1  -8  15 39.1871 23.2492   7
  -1   8 -15 63.2586 56.3646   2
   1  -8  15 71.6115 67.1764   1
  -1  -8 -15-21.4170 39.7341   3
   1   8  15 7.17078 48.5895   4
   1   8  16 84.3708 60.3619   4
  -1  -8 -16 100.596 60.0805   3
  -1  -8 -16 94.8235 44.1741   6
   1  -8  16 86.6129 57.5276   1
  -1   8 -16 17.4029 40.2074   2
   1   8  17 31.9623 55.1332   4
  -1  -8 -17 109.307 67.5326   3
  -1  -8 -17 60.7268 43.3582   6
   1  -8  17 64.4877 81.0238   1
  -1   8 -17 10.1645 45.9502   2
   1  -8  18-69.6910 64.0650   1
  -1  -8 -18 24.7081 41.4226   3
  -1   8 -18 73.4439 71.0099   2
   1   8  18 111.425 69.7793   4
  -1  -8 -18 30.9639 37.3625   6
  -1   8 -19 34.8952 55.1413   2
   1   8  19 205.708 94.5557   4
   1  -8  19-11.1867 49.0645   1
  -1   8 -19 34.3223 68.8767   3
  -1  -8 -19 79.4403 69.6041   3
  -1  -8 -19-18.1548 28.0675   6
   1   8  20 370.359 123.708   4
   1   8  21 66.7678 65.0030   4
   1   8  22 180.467 92.3275   4
  -1   9  20 66.5056 50.2375   4
   1  -9 -19 81.2909 66.5174   3
  -1   9  19 41.6438 63.4372   4
   1   9 -19 97.8230 68.1874   2
  -1  -9  18 62.4417 42.0607   1
   1  -9 -18 63.5242 62.5641   3
   1   9 -18 37.8801 79.1566   2
  -1   9  18 39.5830 62.7956   4
   1  -9 -17-11.7151 43.0387   3
  -1  -9  17 60.4587 77.1174   1
  -1   9  17-54.6593 75.1964   4
   1   9 -17 99.6818 61.7380   2
   1   9 -16 737.066 155.909   2
   1  -9 -16 1024.30 193.593   3
  -1   9  16 997.387 198.049   4
  -1  -9  16 1049.13 214.336   1
   1   9 -15 161.820 76.8416   2
   1  -9 -15 220.703 87.8211   3
  -1   9  15 143.022 72.9082   4
  -1  -9  15 135.352 78.7135   1
   1   9 -14 355.772 102.792   2
  -1   9  14 151.770 68.1426   4
   1  -9 -14 352.273 109.693   3
  -1  -9  14 267.722 114.354   1
  -1   9  13 343.984 113.265   4
  -1  -9  13 395.590 117.702   1
   1  -9 -13 604.513 138.854   3
   1  -9 -13 454.996 114.237   1
   1   9 -13 507.401 118.792   2
   1  -9 -12 2896.83 282.457   1
  -1  -9  12 3247.56 343.755   1
   1   9 -12 2942.86 279.503   2
  -1   9  12 2702.86 293.610   4
   1  -9 -12 2708.64 290.051   3
  -1   9  11 227.141 86.8431   4
   1  -9 -11 121.641 60.8664   1
   1   9 -11 222.389 80.6071   2
  -1  -9  11 168.004 90.1576   1
   1  -9 -11 80.8514 49.6045   3
  -1  -9  10 126.886 70.2674   1
   1  -9 -10 104.641 59.2632   1
   1   9 -10 182.232 73.6400   2
  -1   9  10 48.9257 62.2578   4
  -1   9   9-23.0543 34.6516   4
  -1  -9   9 62.9901 57.3931   2
   1  -9  -9 24.3222 45.0124   1
   1   9  -9 36.6851 36.0529   2
  -1  -9   9 16.5861 42.0572   1
  -1  -9   8 3808.43 302.330   2
   1   9  -8 3829.75 296.325   2
  -1  -9   8 4036.10 355.022   1
  -1   9   8 4337.78 346.744   4
   1  -9  -8 4532.66 325.991   1
   1  -9  -7 232.980 75.4336   1
  -1  -9   7 164.494 69.2593   2
  -1   9   7 201.297 31.1582   8
  -1  -9   7 192.393 84.8777   1
  -1   9   7 219.712 84.4681   4
   1   9  -7 253.396 80.3106   2
  -1   9   6 199.544 42.3264   8
  -1  -9   6 256.103 84.0458   1
   1  -9  -6 133.477 53.6645   1
  -1  -9   6 266.312 75.4023   2
  -1   9   6 183.198 73.6512   4
   1   9  -6 334.521 91.1357   2
   1   9  -5 5797.91 346.040   2
  -1   9   5 6735.75 416.045   4
  -1  -9   5 5839.42 406.888   1
   1  -9  -5 6574.26 384.915   1
  -1  -9   4 1333.83 189.585   1
   1   9  -4 1746.63 185.243   2
   1  -9  -4 1869.81 203.084   1
  -1   9   4 1805.02 213.201   4
  -1  -9   3 589.532 126.100   4
   1  -9  -3 340.472 88.9745   1
   1   9  -3 433.690 98.8859   1
  -1   9   3 356.203 89.1799   3
  -1   9   3 415.787 101.783   2
  -1  -9   3 426.412 106.668   1
   1   9  -3 349.182 82.1696   2
   1  -9  -3 422.278 105.217   4
  -1   9   3 451.133 109.195   4
   1   9  -2 4015.74 276.004   2
   1   9  -2 3933.18 288.954   1
  -1  -9   2 3730.84 306.275   1
  -1  -9   2 3710.99 302.895   4
   1   9  -2 3506.07 155.152   7
  -1   9   2 3841.60 296.886   2
   1  -9  -2 3570.15 281.282   1
  -1   9   2 4288.65 309.382   3
   1  -9  -2 4285.40 329.040   4
  -1   9   1 586.638 115.650   2
  -1  -9   1 677.949 127.789   4
   1   9  -1 509.498 101.795   1
   1  -9  -1 598.876 115.516   1
   1  -9  -1 662.856 135.155   4
  -1  -9   1 514.848 109.597   1
   1   9  -1 748.934 127.863   3
   1   9  -1 514.604 107.506   2
   1   9  -1 607.229 69.6886   7
  -1   9   1 628.074 120.621   3
  -1   9   0 1324.83 161.419   1
   1   9   0 1326.67 171.152   3
  -1  -9   0 1151.34 166.647   1
  -1   9   0 1320.92 171.818   2
   1   9   0 1290.13 155.503   2
  -1   9   0 1521.68 183.965   3
   1   9   0 1235.24 107.658   7
   1  -9   0 1322.87 182.723   4
   1  -9   0 1191.87 166.258   1
   1   9   0 1304.04 162.671   1
  -1  -9   0 1352.36 181.689   4
  -1   9   0 1238.89 85.8041   7
   1   9   1 264.229 57.0697   7
   1  -9   1 216.634 76.6156   4
   1   9   1 191.615 67.9988   3
   1   9   1 195.237 64.3173   2
  -1  -9  -1 184.204 71.3145   4
   1  -9   1 199.567 65.1216   1
  -1   9  -1 118.779 48.2181   2
  -1   9  -1 127.541 21.7267   7
  -1   9  -1 135.141 34.7210   1
  -1  -9  -1 299.992 85.1071   1
   1   9   1 247.133 65.4567   8
   1  -9   2 203.209 69.3968   1
  -1   9  -2 172.462 50.3475   1
   1   9   2 260.669 69.4380   8
  -1  -9  -2 218.890 71.2148   4
   1   9   2 151.773 42.8688   7
  -1   9  -2 229.412 74.5273   2
   1   9   2 323.203 85.6819   3
   1  -9   2 241.092 84.1870   4
   1   9   2 189.034 62.7708   2
  -1  -9  -2 429.391 105.835   1
  -1   9  -3 2510.62 242.415   2
  -1  -9  -3 2935.39 269.568   4
   1   9   3 2739.13 230.020   2
   1   9   3 3169.46 264.699   3
  -1  -9  -3 2644.21 247.496   1
   1  -9   3 2492.41 248.317   4
   1  -9   3 2695.30 260.167   1
   1   9   3 2993.99 204.377   8
   1   9   3 2868.53 199.879   7
  -1   9  -3 2923.31 247.578   1
   1  -9   4 584.318 126.587   1
  -1   9  -4 618.281 120.293   2
   1   9   4 579.844 95.6340   7
  -1  -9  -4 472.977 104.891   1
   1   9   4 577.759 85.0995   8
  -1   9  -4 520.813 106.644   1
  -1  -9  -4 673.034 127.887   4
   1  -9   4 646.065 126.955   4
   1   9   5 782.874 92.3845   8
   1   9   5 644.812 104.440   7
  -1  -9  -5 720.175 128.587   1
   1  -9   5 642.437 129.849   1
  -1  -9  -5 739.027 138.975   4
  -1   9  -5 665.213 119.889   1
  -1   9  -5 695.659 131.562   2
   1   9   6 462.626 96.3659   7
   1   9   6 379.428 107.045   4
   1   9   6 429.582 61.8806   8
   1  -9   6 378.238 102.732   1
  -1  -9  -6 511.066 111.217   1
  -1   9  -6 366.923 103.264   2
   1   9   7 330.784 84.0821   7
   1  -9   7 336.676 100.931   1
   1   9   7 442.790 53.8926   8
  -1   9  -7 422.561 101.623   2
  -1  -9  -7 523.892 116.624   1
   1   9   7 465.237 114.622   4
  -1   9  -8 826.687 150.963   2
  -1  -9  -8 888.176 153.677   1
   1   9   8 866.835 137.251   7
   1   9   8 1017.03 165.374   4
   1  -9   8 1274.86 194.904   1
   1   9   9 192.134 74.9393   4
   1   9   9 185.574 71.9759   7
  -1  -9  -9 239.570 79.0948   1
  -1  -9  -9 149.398 72.4484   3
  -1   9  -9 313.626 95.6768   2
   1  -9   9 171.334 78.7549   1
   1  -9  10 2780.88 302.119   1
  -1   9 -10 2832.27 283.610   2
  -1  -9 -10 2265.34 247.503   1
  -1  -9 -10 2208.93 256.909   3
   1   9  10 1900.15 230.264   4
   1   9  11 714.134 150.555   4
  -1  -9 -11 664.524 142.708   3
  -1  -9 -11 591.195 133.940   1
   1  -9  11 598.250 142.296   1
  -1   9 -11 632.391 139.736   2
   1   9  12 2650.54 279.637   4
  -1  -9 -12 2732.11 278.077   1
   1  -9  12 2619.34 309.095   1
  -1   9 -12 2676.78 287.100   2
  -1  -9 -12 2783.11 294.575   3
  -1   9 -13 412.207 120.230   2
   1   9  13 168.719 80.2922   4
  -1  -9 -13 178.570 91.3310   3
   1  -9  13 359.142 119.451   1
  -1  -9 -13 195.793 82.9959   1
  -1   9 -14 446.845 125.315   2
   1   9  14 403.634 114.541   4
   1  -9  14 383.039 112.548   1
  -1  -9 -14 503.347 135.196   3
  -1  -9 -15 537.705 145.523   3
  -1   9 -15 621.279 147.822   2
   1   9  15 475.034 128.982   4
   1  -9  15 459.775 143.249   1
  -1  -9 -16 286.020 106.185   3
  -1   9 -16 195.733 98.1079   2
   1   9  16 224.398 90.1148   4
   1  -9  16 105.134 63.9441   1
   1   9  17-32.8858 43.4946   4
  -1  -9 -17-36.6794 68.8474   3
  -1   9 -17-30.9237 49.6406   2
   1  -9  17-0.37282 37.4037   1
  -1  -9 -17 4.34952 33.4686   6
   1   9  18 253.564 105.985   4
  -1  -9 -18 267.764 84.5519   6
   1  -9  18 375.057 134.490   1
  -1   9 -18 315.126 125.262   2
  -1  -9 -18 186.538 96.4996   3
   1   9  19 4.70026 38.1968   4
   1   9  20 188.344 103.161   4
   1   9  21 325.347 96.5191   4
  -1  10  18 4.90078 49.2528   4
   1  10 -18 131.341 76.5752   2
  -1  10  17 1973.15 282.084   4
  -1 -10  17 1601.51 283.345   1
   1 -10 -17 1949.10 284.755   3
   1  10 -17 1705.97 250.750   2
   1 -10 -16-6.85389 47.8000   1
  -1 -10  16 108.960 67.2630   1
  -1  10  16 150.029 76.8084   4
   1 -10 -16 156.612 92.5822   3
   1  10 -16 66.8390 62.3280   2
   1  10 -15 1110.94 195.460   2
  -1  10  15 1290.54 220.932   4
   1 -10 -15 1626.47 248.572   3
  -1 -10  15 1305.74 243.239   1
   1 -10 -15 1406.34 215.315   1
  -1  10  14 160.463 76.5992   4
   1  10 -14 256.714 102.085   2
   1 -10 -14 233.137 95.2943   1
  -1 -10  14 261.433 120.146   1
   1 -10 -14 89.0402 48.9096   3
   1  10 -13 771.491 160.164   2
   1 -10 -13 878.664 178.657   3
  -1 -10  13 792.974 184.243   1
  -1  10  13 928.243 181.542   4
   1 -10 -13 949.499 168.855   1
  -1 -10  12 591.905 158.449   1
   1 -10 -12 462.327 115.650   1
  -1  10  12 445.282 119.156   4
   1  10 -12 591.902 131.828   2
  -1 -10  11 1070.73 205.538   1
   1  10 -11 1037.25 169.966   2
  -1  10  11 924.869 181.792   4
   1 -10 -11 653.397 136.372   1
  -1 -10  10 58.7956 57.3407   1
   1 -10 -10 64.1425 45.9557   1
   1  10 -10 92.3639 51.7010   2
  -1  10  10 41.9674 56.3608   4
   1  10  -9 146.039 67.0693   2
  -1  10   9 189.704 82.1888   4
   1 -10  -9 80.6615 44.1459   1
  -1 -10   9 141.931 85.8100   1
   1  10  -8 95.3698 49.3643   2
  -1 -10   8 107.636 66.0784   1
   1 -10  -8 10.0036 34.2305   1
  -1  10   8-9.91643 46.6211   4
  -1  10   7 2853.65 292.309   4
   1 -10  -7 2767.08 271.896   1
  -1  10   7 2511.50 126.203   8
   1  10  -7 3134.00 274.230   2
  -1 -10   7 3396.88 335.326   1
   1  10  -6 775.677 136.534   2
  -1  10   6 580.236 72.9585   8
  -1 -10   6 599.207 144.049   1
   1 -10  -6 594.714 124.776   1
  -1  10   6 523.667 131.025   4
   1  10  -5 1219.32 167.042   2
  -1  10   5 1112.80 180.784   4
   1 -10  -5 1066.75 163.668   1
  -1 -10   5 1082.46 184.157   1
   1 -10  -4 82.2577 61.2544   1
   1  10  -4 103.460 60.0708   2
  -1  10   4 78.4026 56.6237   2
  -1  10   4-17.4511 44.4357   4
  -1 -10   4 173.228 77.0397   1
   1 -10  -3 436.340 109.114   1
  -1 -10   3 520.101 127.000   1
   1  10  -3 610.746 115.163   2
  -1  10   3 450.505 108.075   2
  -1 -10   2 2.98344 47.8717   1
   1  10  -2 22.1323 15.6076   7
  -1  10   2-47.1135 61.7351   2
  -1  10   2 14.2320 24.1424   7
   1  10  -2 2.73525 32.5978   2
   1 -10  -2 14.5752 28.4291   1
   1 -10  -1 1496.95 194.833   1
  -1  10   1 1395.93 106.562   7
   1  10  -1 1482.03 111.899   7
   1  10  -1 1622.85 185.606   2
  -1  10   1 1678.84 206.005   2
  -1 -10   1 1621.53 214.765   1
  -1  10   0 616.923 60.9508   7
   1  10   0 658.416 116.040   2
  -1 -10   0 650.727 132.951   1
   1 -10   0 651.906 130.089   1
   1  10   0 571.173 76.7726   7
  -1  10   0 658.874 132.420   2
  -1  10  -1 994.785 158.313   2
   1 -10   1 912.779 157.065   1
  -1 -10  -1 865.517 155.199   1
   1  10   1 827.724 98.2589   7
  -1  10  -1 636.249 42.4475   7
   1  10   1 826.738 123.560   8
   1  10   1 911.167 139.975   2
  -1  10  -2 142.198 57.7506   2
   1  10   2 153.343 56.0113   8
  -1 -10  -2 141.144 61.7393   1
   1  10   2 159.763 57.6211   2
   1 -10   2 88.3743 60.0495   1
   1  10   2 103.181 35.1888   7
   1  10   3 1556.69 150.292   7
   1  10   3 1605.59 158.522   8
  -1  10  -3 1903.19 223.402   2
   1  10   3 1485.76 183.344   2
   1 -10   3 1896.29 233.314   1
  -1 -10  -3 1371.18 193.700   1
   1  10   4 204.720 60.8790   7
   1  10   4 158.096 67.7446   2
  -1  10  -4 198.747 70.7168   2
  -1 -10  -4 215.796 81.8802   1
   1 -10   4 151.539 79.5118   1
   1  10   4 119.639 45.9384   8
   1  10   5 244.482 71.8391   7
  -1 -10  -5 355.855 101.608   1
   1 -10   5 379.164 119.594   1
   1  10   5 301.088 62.0041   8
  -1  10  -5 317.445 96.2991   2
   1 -10   6 44.6694 53.8878   1
  -1 -10  -6 223.106 86.7889   1
   1  10   6 211.733 45.4351   8
  -1  10  -6 144.789 55.4598   2
   1  10   6 283.497 78.1503   7
  -1 -10  -7 2322.86 254.501   1
  -1  10  -7 2907.04 287.171   2
   1 -10   7 2527.21 285.046   1
   1  10   7 2449.58 270.298   4
   1  10   7 2419.49 221.766   7
   1  10   7 2118.85 129.496   8
   1 -10   8 106.607 70.2297   1
   1  10   8 43.8479 47.2780   7
  -1  10  -8 170.820 70.1647   2
   1  10   8 28.8810 13.8267   8
  -1 -10  -8 5.86605 37.4159   1
   1  10   8 43.9789 63.0352   4
  -1  10  -9 1107.84 183.619   2
   1  10   9 714.684 144.564   4
   1 -10   9 1119.79 201.274   1
  -1 -10  -9 862.548 158.452   1
   1  10   9 776.962 135.708   7
   1  10  10-72.6824 36.7768   7
  -1 -10 -10-53.0925 51.8985   1
  -1  10 -10 97.2321 71.4404   2
   1  10  10-26.1458 54.8318   4
   1 -10  10-11.9811 37.9099   1
   1  10  11 1413.03 200.776   7
   1  10  11 1587.05 225.403   4
  -1 -10 -11 1568.28 218.761   1
  -1 -10 -11 1455.69 219.034   3
  -1  10 -11 1376.46 207.288   2
   1 -10  11 1673.66 249.313   1
   1 -10  12 667.856 159.993   1
  -1 -10 -12 796.294 171.757   3
  -1  10 -12 716.103 154.928   2
   1  10  12 570.796 135.770   7
  -1 -10 -12 765.888 158.603   1
   1  10  12 666.623 152.130   4
   1  10  13 2223.24 283.031   4
  -1  10 -13 2054.47 266.616   2
   1 -10  13 2166.31 298.309   1
  -1 -10 -13 2366.36 291.874   3
  -1 -10 -13 2352.78 277.180   1
   1  10  13 2134.07 248.609   7
  -1  10 -14 803.378 171.287   2
   1  10  14 798.464 167.473   4
  -1 -10 -14 607.284 151.261   3
  -1 -10 -14 632.926 146.585   1
   1  10  14 714.302 150.841   7
   1 -10  14 825.715 191.659   1
  -1 -10 -15 114.706 65.0709   1
   1 -10  15 254.404 118.111   1
   1  10  15 116.325 76.3846   7
  -1 -10 -15 89.1220 64.0624   3
  -1  10 -15 191.216 98.0699   2
   1  10  15 133.813 66.1414   4
  -1 -10 -16 521.690 149.666   3
   1  10  16 471.333 135.739   4
  -1  10 -16 563.329 149.071   2
   1 -10  16 648.285 172.626   1
   1  10  16 546.319 143.527   7
  -1 -10 -16 381.062 120.465   1
   1  10  17 211.394 110.153   7
  -1  10 -17 131.591 61.0654   2
  -1 -10 -17 160.435 83.7510   6
   1  10  17 236.211 96.0512   4
   1 -10  17 114.584 71.5355   1
   1  10  18 77.7183 64.9064   4
   1  10  19 1124.33 213.261   4
   1  11 -17 403.074 124.505   2
   1 -11 -16 27.5679 60.8006   1
   1  11 -16-30.1031 49.0427   2
  -1  11  16 23.1191 46.1111   4
  -1 -11  15 986.570 216.554   1
   1 -11 -15 876.308 183.652   1
  -1  11  15 653.029 167.575   4
   1  11 -15 678.034 162.680   2
   1  11 -14 827.630 166.760   2
  -1 -11  14 1057.05 228.606   1
   1 -11 -14 817.755 173.836   1
  -1  11  14 522.711 150.648   4
   1  11 -13 2800.37 302.842   2
  -1  11  13 2841.75 330.204   4
  -1 -11  13 2890.92 363.389   1
   1 -11 -13 2428.94 286.440   1
   1 -11 -12 202.953 84.7380   1
   1  11 -12 348.663 109.842   2
  -1 -11  12 270.641 98.6340   1
  -1  11  12 132.874 73.4846   4
   1 -11 -11 953.185 175.393   1
   1  11 -11 1644.91 223.317   2
  -1 -11  11 1728.37 273.997   1
  -1  11  11 908.159 186.849   4
   1 -11 -10 72.5768 61.8490   1
  -1 -11  10 322.008 122.918   1
   1  11 -10 220.124 77.4985   2
  -1  11  10 175.008 93.8034   4
  -1  11   9 1131.01 203.508   4
  -1 -11   9 619.083 163.115   1
   1 -11  -9 1243.78 200.685   1
   1  11  -9 679.680 141.740   2
   1  11  -8 779.451 144.776   2
  -1 -11   8 834.348 185.283   1
   1 -11  -8 1218.62 192.324   1
   1  11  -7 454.046 109.471   2
  -1  11   7 510.627 61.5713   8
  -1 -11   7 498.437 141.212   1
   1 -11  -7 555.287 127.228   1
  -1  11   7 677.188 155.613   4
   1 -11  -6 919.879 164.186   1
  -1 -11   6 936.766 186.423   1
  -1  11   6 1244.46 114.730   8
  -1  11   6 1264.08 205.454   4
   1  11  -6 964.280 158.747   2
  -1  11   5 11938.6 606.677   2
   1 -11  -5 12380.8 609.436   1
   1  11  -5 12253.6 571.785   2
  -1 -11   5 12049.9 663.565   1
  -1  11   5 12436.6 423.257   8
  -1 -11   4 560.224 141.288   1
  -1  11   4 571.849 129.415   2
  -1  11   4 644.606 98.9759   7
   1 -11  -4 747.195 150.311   1
   1  11  -4 597.174 126.797   2
  -1  11   3 1372.60 196.845   2
  -1  11   3 1332.81 128.720   7
   1  11  -3 1496.92 194.046   2
  -1 -11   3 1621.29 230.185   1
   1 -11  -3 1466.73 211.449   1
   1  11  -2 236.106 74.9015   2
   1 -11  -2 248.446 79.6142   1
  -1  11   2 351.522 62.4819   7
   1  11  -2 296.673 41.3700   7
  -1 -11   2 211.213 79.7403   1
  -1  11   2 253.977 76.8254   2
  -1  11   1 86.1085 53.2171   2
  -1 -11   1 83.1167 57.5129   1
   1  11  -1 86.2202 30.4925   7
   1  11  -1 81.3450 43.9710   2
  -1  11   1 61.5040 23.9771   7
   1 -11  -1 241.081 89.5310   1
  -1 -11   0 863.233 163.375   1
  -1  11   0 654.725 139.006   2
   1  11   0 762.862 129.029   8
  -1  11   0 447.615 49.0010   7
   1 -11   0 622.789 130.561   1
   1  11   0 577.333 76.1406   7
   1  11   0 741.298 133.502   2
   1  11   1 197.920 65.5100   8
  -1  11  -1 216.062 77.9349   2
   1  11   1 215.249 55.7353   7
   1  11   1 172.389 72.1417   2
  -1 -11  -1 203.876 85.7363   1
   1 -11   1 389.656 111.432   1
  -1  11  -2 876.079 158.727   2
   1  11   2 1001.37 137.906   8
   1 -11   2 890.371 166.797   1
   1  11   2 859.470 142.697   2
   1  11   2 879.534 108.970   7
  -1 -11  -2 1053.74 178.677   1
   1  11   3-20.6197 34.1549   2
  -1 -11  -3-16.3343 46.8868   1
   1 -11   3 29.1798 47.3313   1
   1  11   3 20.8124 26.6031   7
   1  11   3 73.3329 41.5039   8
  -1  11  -3 34.3840 45.6184   2
   1  11   4 205.735 61.3010   8
  -1  11  -4 172.921 71.0062   2
   1 -11   4 220.000 95.0795   1
  -1 -11  -4 294.182 96.4278   1
   1  11   4 198.539 71.0564   2
   1  11   4 219.429 57.3552   7
   1  11   5 317.755 85.0975   7
   1  11   5 356.183 69.9852   8
  -1 -11  -5 444.537 120.888   1
  -1  11  -5 267.698 88.6181   2
   1  11   5 250.918 89.0330   2
   1 -11   5 265.293 98.8445   1
   1  11   6 536.430 106.143   7
   1 -11   6 659.457 153.222   1
  -1 -11  -6 792.179 158.792   1
  -1  11  -6 777.375 157.331   2
   1  11   6 736.268 91.9416   8
  -1  11  -7 31.9840 39.8564   2
   1 -11   7-21.8411 36.4359   1
   1  11   7 33.7155 18.8039   8
   1  11   7-31.7379 45.9019   7
  -1 -11  -7 1.25345 40.3216   1
  -1 -11  -8 1387.76 210.231   1
   1  11   8 1111.29 78.0668   8
  -1  11  -8 1585.80 223.233   2
   1  11   8 1489.92 186.640   7
   1 -11   8 1471.68 241.498   1
   1  11   9 428.021 111.012   7
   1 -11   9 771.921 172.340   1
   1  11   9 631.145 147.213   4
  -1  11  -9 680.392 149.648   2
  -1 -11  -9 701.888 151.904   1
   1  11  10 490.968 134.729   4
  -1 -11 -10 731.416 160.461   1
   1  11  10 590.679 129.219   7
  -1  11 -10 955.016 179.017   2
   1 -11  10 897.172 188.383   1
   1  11  11 1414.30 223.951   4
   1 -11  11 1620.81 259.046   1
   1  11  11 1254.67 194.277   7
  -1  11 -11 1609.63 235.780   2
  -1 -11 -11 1362.69 215.746   1
  -1 -11 -12 2316.50 290.483   1
   1 -11  12 2342.07 316.888   1
   1  11  12 2459.25 297.930   4
   1  11  12 2317.93 271.308   7
  -1  11 -12 2292.31 287.536   2
  -1  11 -13 227.366 98.0819   2
   1 -11  13 281.025 102.600   1
  -1 -11 -13 234.111 100.183   1
   1  11  13 315.347 115.479   4
   1  11  13 237.248 113.755   7
  -1  11 -14 153.727 82.2916   2
   1 -11  14 142.273 94.0307   1
  -1 -11 -14 258.754 112.684   1
   1  11  14 33.2529 51.1174   4
   1  11  14 153.016 77.2384   7
  -1 -11 -14 255.174 105.826   3
  -1 -11 -15 406.317 125.688   1
  -1  11 -15 758.194 179.082   2
   1  11  15 525.835 144.406   7
   1  11  15 467.754 140.247   4
  -1 -11 -15 990.113 207.341   3
   1 -11  15 528.566 169.349   1
  -1  11 -16 1152.94 220.203   2
   1  11  16 960.214 191.721   7
   1  11  16 1152.37 204.691   4
   1  11  17 153.342 78.4323   4
   1  12 -16 670.904 163.787   2
   1  12 -15 117.440 62.8304   2
  -1  12  14-45.9058 81.1168   4
   1 -12 -14-12.1542 38.9991   1
   1  12 -14 127.494 83.0314   2
   1  12 -13 1137.42 203.398   2
   1 -12 -13 1003.42 198.966   1
  -1  12  13 860.144 194.064   4
  -1 -12  13 774.374 195.090   1
   1 -12 -12 6.30012 39.4173   1
   1  12 -12 21.2204 56.4068   2
  -1  12  12 112.393 63.5345   4
  -1 -12  12-92.7542 78.4337   1
   1  12 -11 274.694 102.786   2
  -1 -12  11 272.848 124.885   1
   1 -12 -11 335.110 121.186   1
  -1  12  11 418.357 129.681   4
  -1 -12  10 1968.15 297.619   1
   1 -12 -10 2275.32 284.403   1
   1  12 -10 2051.55 255.700   2
  -1  12  10 1990.95 282.649   4
   1  12  -9 263.058 92.9325   2
  -1 -12   9 341.041 126.872   1
  -1  12   9 284.021 104.330   4
   1 -12  -9 200.090 84.9148   1
  -1  12   8 800.718 178.310   4
   1 -12  -8 788.348 164.151   1
  -1 -12   8 590.136 162.741   1
   1  12  -8 736.831 149.725   2
  -1  12   7 742.891 126.260   7
   1 -12  -7 643.858 149.723   1
  -1 -12   7 680.268 166.349   1
   1  12  -7 750.711 150.640   2
  -1  12   7 932.083 179.210   2
  -1  12   6-22.2986 22.7986   7
   1 -12  -6 12.0881 44.3282   1
  -1  12   6 37.8332 46.1644   2
   1  12  -6 25.3255 39.2935   2
  -1  12   6 4.05725 18.5834   8
   1  12  -5 98.1540 39.4400   2
  -1 -12   5 191.952 88.9605   1
  -1  12   5 170.815 48.2939   8
  -1  12   5 102.696 46.5888   7
  -1  12   5 88.3872 62.6333   2
   1 -12  -5 191.358 85.7287   1
   1 -12  -4 1755.37 243.367   1
  -1  12   4 1450.18 144.351   7
   1  12  -4 1438.25 202.745   2
  -1 -12   4 1604.91 248.346   1
  -1  12   4 1732.33 235.975   2
  -1  12   3 86.2007 61.1072   2
   1 -12  -3 87.6442 65.6502   1
  -1  12   3 21.5348 20.0919   7
  -1 -12   3 60.0186 67.0333   1
   1  12  -3 118.534 54.1867   2
  -1 -12   2 89.5948 62.2400   1
  -1  12   2-70.4936 66.9917   2
  -1  12   2 57.6883 28.5373   7
   1  12  -2 73.6039 51.0769   2
   1 -12  -2-10.1357 51.9392   1
   1 -12  -1 2339.53 277.369   1
   1  12  -1 2365.66 246.103   8
  -1  12   1 1800.87 118.843   7
   1  12  -1 2513.15 256.904   2
   1  12  -1 1775.83 117.303   7
  -1  12   1 2229.48 260.187   2
  -1 -12   1 2558.87 300.037   1
   1  12   0-6.57045 33.8208   8
  -1  12   0 62.9336 64.7487   2
   1  12   0 22.4826 40.9707   2
  -1 -12   0-8.17340 50.0562   1
   1  12   0 1.15720 21.0829   7
   1 -12   0 40.9270 42.8404   1
   1  12   1 1068.50 151.901   8
   1 -12   1 1493.00 223.159   1
  -1 -12  -1 1063.00 192.423   1
  -1  12  -1 1237.93 192.241   2
   1  12   1 904.582 104.717   7
   1  12   1 868.481 149.651   2
  -1  12  -2 508.937 124.336   2
   1 -12   2 429.079 120.663   1
   1  12   2 468.915 115.876   2
   1  12   2 428.444 78.7803   7
  -1 -12  -2 485.259 124.002   1
   1  12   2 524.598 101.326   8
  -1  12  -3 465.733 119.993   2
   1  12   3 323.825 95.2871   2
  -1 -12  -3 554.174 139.401   1
   1 -12   3 288.101 100.323   1
   1  12   3 462.289 87.5029   7
   1  12   3 511.366 100.896   8
   1  12   4 315.138 99.7600   2
  -1  12  -4 443.685 119.957   2
   1 -12   4 676.356 156.121   1
  -1 -12  -4 354.843 118.182   1
   1  12   4 423.576 87.1083   8
   1  12   4 379.642 77.9675   7
   1  12   5 137.218 55.1295   7
   1  12   5 89.2329 52.2198   2
   1 -12   5 39.5905 44.8471   1
  -1  12  -5 112.088 76.3363   2
   1  12   5 200.936 62.3927   8
  -1 -12  -5 212.494 94.9322   1
   1 -12   6 892.540 181.859   1
   1  12   6 1009.44 149.361   7
   1  12   6 1065.58 117.516   8
  -1 -12  -6 926.447 178.353   1
  -1  12  -6 1096.13 187.988   2
   1  12   6 975.666 169.880   2
   1 -12   7 1772.69 274.658   1
  -1  12  -7 1514.14 225.091   2
   1  12   7 1595.44 190.655   7
  -1 -12  -7 1551.52 236.736   1
   1  12   8 69.0811 51.4905   7
  -1  12  -8 91.8408 65.4368   2
  -1 -12  -8 73.8696 57.7872   1
   1 -12   8 94.9972 71.2405   1
  -1  12  -9 104.980 72.1593   2
   1  12   9 37.4126 28.7913   7
   1 -12   9 56.5723 92.2103   1
  -1 -12  -9-41.8392 43.2327   1
  -1 -12 -10 451.867 133.794   1
  -1  12 -10 387.097 119.858   2
   1  12  10 362.567 100.636   7
   1 -12  10 285.755 120.294   1
   1  12  11-30.4523 39.8987   7
  -1  12 -11 41.2212 75.2117   2
   1  12  11 5.63367 46.6969   4
   1 -12  11 28.0982 45.1837   1
  -1 -12 -11 7.70303 32.7905   1
   1  12  12 95.7444 64.8523   7
   1 -12  12 240.364 114.497   1
   1  12  12-24.3543 40.0034   4
  -1 -12 -12 159.510 83.1843   1
  -1  12 -12 242.103 111.238   2
   1  12  13 1152.30 220.355   4
   1 -12  13 858.827 206.214   1
  -1  12 -13 911.041 195.047   2
   1  12  13 1037.88 190.200   7
  -1  12 -14 465.045 135.295   2
   1 -12  14 466.250 154.256   1
   1  12  14 267.725 105.108   7
   1  12  14 279.370 123.774   4
   1  12  15-68.7637 76.8302   4
   1  12  15 152.131 84.5799   7
   1  13 -14 750.777 180.201   2
   1  13 -13 239.209 102.024   2
  -1  13  12 914.130 168.259   7
   1  13 -12 1039.28 191.336   2
  -1  13  11 76.9110 71.3928   7
   1 -13 -11-14.7315 44.1705   1
   1  13 -11 41.6922 54.2364   2
  -1  13  11-100.258 41.4202   4
  -1 -13  11-8.98145 50.4629   1
  -1  13  10-10.0806 54.6990   4
   1 -13 -10 25.0627 59.6085   1
   1  13 -10 48.3599 39.8561   2
  -1  13  10 49.2043 29.3441   7
  -1 -13  10 51.2239 70.7206   1
   1 -13  -9 787.516 178.419   1
   1  13  -9 1082.20 191.575   2
  -1 -13   9 850.804 200.085   1
  -1  13   9 823.836 142.697   7
   1  13  -8 596.510 135.485   2
   1 -13  -8 441.942 132.057   1
  -1  13   8 517.454 141.694   2
  -1  13   8 378.052 101.297   7
  -1 -13   8 663.534 166.798   1
  -1  13   7 925.886 190.970   2
  -1 -13   7 975.443 216.270   1
   1 -13  -7 948.059 193.484   1
   1  13  -7 957.546 176.706   2
  -1  13   7 958.014 138.913   7
  -1 -13   6-15.2148 48.4466   1
   1  13  -6 68.3681 59.8032   2
   1 -13  -6 14.2546 63.3303   1
  -1  13   6-68.7985 67.4470   2
  -1  13   6-6.73604 34.6601   7
  -1  13   5 448.158 122.448   2
   1 -13  -5 611.078 152.677   1
  -1 -13   5 559.820 155.779   1
   1  13  -5 474.853 117.774   2
   1  13  -4 240.382 82.1073   2
   1 -13  -4 270.448 99.9197   1
  -1 -13   4 218.114 95.8515   1
  -1  13   4 280.846 73.1231   8
  -1  13   4 287.712 103.634   2
  -1  13   3 62.3050 53.9628   2
  -1 -13   3 217.581 103.829   1
   1  13  -3 281.308 92.4159   2
   1 -13  -3 37.9932 62.6662   1
   1 -13  -2 3474.77 358.810   1
  -1  13   2 3617.95 353.589   2
  -1 -13   2 3732.42 385.011   1
   1  13  -2 3777.39 335.564   2
   1  13  -2 3550.49 323.159   8
  -1  13   1 98.8734 59.5121   2
   1  13  -1 337.182 100.043   8
   1 -13  -1 69.9706 69.4026   1
  -1 -13   1 204.135 96.0430   1
   1  13  -1 179.373 76.7518   2
   1 -13   0 16.2719 46.0591   1
  -1 -13   0 145.561 81.1888   1
  -1  13   0 53.6913 47.0246   2
   1  13   0 201.570 77.7206   8
   1  13   0 136.879 62.5293   2
   1 -13   1 780.529 173.278   1
  -1 -13  -1 706.733 165.720   1
   1  13   1 900.349 162.152   2
   1  13   1 1033.47 158.732   8
  -1  13  -1 659.221 152.176   2
   1  13   2 107.015 50.2749   8
   1  13   2 101.642 45.0987   2
  -1 -13  -2 202.251 103.773   1
  -1  13  -2 2.78371 39.9635   2
   1  13   3 309.250 95.0610   2
  -1  13  -3 443.831 128.085   2
   1 -13   3 235.207 103.256   1
  -1 -13  -3 341.537 127.467   1
   1  13   3 343.337 93.0589   8
  -1 -13  -4 591.641 151.290   1
   1 -13   4 855.094 186.978   1
   1  13   4 646.582 140.892   2
   1  13   4 550.188 104.314   8
  -1  13  -4 787.488 168.103   2
   1  13   4 527.811 96.6435   7
  -1 -13  -5 177.581 79.7249   1
   1  13   5 147.863 56.4429   7
  -1  13  -5 144.774 89.4317   2
   1  13   5 167.610 89.5917   2
   1 -13   5 195.678 83.8788   1
  -1 -13  -6 69.7734 40.8235   1
  -1  13  -6 29.8988 37.5913   2
   1  13   6 34.5161 25.1238   7
   1 -13   6 183.910 87.5818   1
   1  13   6 75.6781 38.3118   2
   1 -13   7 106.395 75.0397   1
   1  13   7 0.39980 29.5398   7
  -1  13  -7 101.690 67.2735   2
  -1 -13  -7 134.109 56.1673   1
   1  13   7 209.312 94.0207   2
   1  13   8 790.250 145.260   7
  -1  13  -8 780.792 174.269   2
   1 -13   8 645.704 183.861   1
  -1 -13  -8 653.446 159.161   1
   1  13   8 776.593 178.098   2
   1  13   9 1625.89 213.203   7
  -1 -13  -9 1605.14 258.549   1
  -1  13  -9 1677.63 258.554   2
   1 -13   9 1689.04 283.488   1
  -1 -13 -10 519.378 139.996   1
   1 -13  10 488.964 157.119   1
   1  13  10 518.140 128.265   7
  -1  13 -10 591.704 153.057   2
  -1  13 -11 1043.29 205.163   2
   1  13  11 463.830 124.978   7
   1 -13  11 894.030 211.251   1
   1  13  12 797.304 178.228   7
  -1  13 -12 801.294 184.588   2
   1  13  13 1034.32 186.550   7
   1  13  14 92.5260 57.1273   7
   1  14 -12 1799.10 264.372   2
   1  14 -11 1062.77 199.034   2
  -1  14  10 507.887 158.411   2
   1  14 -10 582.656 143.627   2
   1  14  -9 275.684 109.874   2
  -1  14   9 296.683 111.199   2
  -1  14   8-4.03685 59.1986   2
   1 -14  -8 39.0245 66.0954   1
   1  14  -8 87.3290 62.9141   2
  -1  14   7 177.982 96.7560   2
   1 -14  -7 163.511 87.3274   1
  -1 -14   7-2.78563 43.7010   1
   1  14  -7 60.8655 67.7959   2
   1  14  -6 483.864 130.830   2
  -1  14   6 451.187 126.862   2
  -1 -14   6 546.373 159.923   1
   1 -14  -6 624.457 161.552   1
  -1  14   5 141.035 67.7843   2
   1  14  -5 278.711 105.648   2
   1 -14  -5 313.166 110.497   1
  -1 -14   5 347.014 144.987   1
   1  14  -4 2414.71 285.420   2
   1 -14  -4 2687.03 333.301   1
  -1 -14   4 2697.91 355.118   1
  -1  14   4 2626.75 315.753   2
  -1  14   3 178.375 78.7446   2
  -1 -14   3 64.3562 57.4123   1
   1 -14  -3 221.330 108.016   1
   1  14  -3 198.356 97.0377   8
   1  14  -3 139.041 63.2903   2
  -1  14   2 140.605 108.885   2
   1  14  -2 141.211 66.9364   8
  -1 -14   2 72.6302 52.7775   1
   1 -14  -2 264.600 109.723   1
   1  14  -2 173.818 81.1412   2
  -1 -14   1 1068.89 217.686   1
  -1  14   1 1097.37 205.456   2
   1 -14  -1 970.457 200.322   1
   1  14  -1 1240.16 197.815   2
   1  14  -1 1267.08 196.399   8
   1  14   0 125.278 70.8258   8
   1 -14   0-31.9684 70.3698   1
   1  14   0 99.0504 51.6908   2
  -1 -14   0 38.3595 47.9162   1
  -1 -14  -1 82.4165 72.9326   1
  -1  14  -1 82.8170 55.9962   2
   1 -14   1 59.7625 50.7632   1
   1  14   1 26.0318 36.6045   8
   1  14   1 72.5634 50.2181   2
   1 -14   2 346.539 114.404   1
  -1 -14  -2 338.415 115.044   1
  -1  14  -2 368.577 107.251   2
   1  14   2 345.966 108.296   2
   1  14   2 429.036 100.052   8
  -1  14  -3-17.9490 83.6960   2
   1 -14   3-108.879 103.758   1
   1  14   3-20.1136 52.7165   2
  -1 -14  -3-12.2486 68.3080   1
  -1 -14  -4 29.9122 53.1530   1
   1  14   4 15.8554 47.2854   2
   1 -14   4 4.00950 41.9403   1
  -1 -14  -5 1710.10 270.890   1
   1  14   5 1659.23 235.962   2
  -1  14  -5 1522.59 244.988   2
   1 -14   5 1580.92 266.718   1
   1 -14   6-152.464 89.0461   1
  -1 -14  -6 115.357 76.1777   1
  -1  14  -6 177.216 91.8777   2
   1  14   6-55.8034 55.7994   2
   1  14   7 800.222 162.679   2
   1 -14   7 714.721 188.723   1
  -1  14  -7 737.919 173.378   2
   1 -14   8 145.464 73.4377   1
   1  14   8 225.418 91.1723   2
  -1  14  -8 121.887 55.1523   2
  -1  14  -9 1118.84 220.176   2
   1  14   9 799.013 165.051   2
   1  14  10 131.298 76.6445   2
   1  15  -9 987.068 186.939   2
   1  15  -8 549.502 144.818   2
   1  15  -7 818.217 173.101   2
  -1  15   6 4216.11 422.081   2
   1  15  -6 4488.28 407.193   2
  -1  15   5 121.830 78.2027   2
   1  15  -5 64.3695 73.7419   2
   1  15  -5 118.365 70.2521   8
  -1  15   4 121.399 84.6497   2
   1  15  -4 95.9319 50.1514   2
   1  15  -4 89.0308 59.2497   8
   1  15  -3 191.932 88.1015   8
  -1  15   3-21.9758 69.3391   2
   1  15  -3 28.5520 60.0610   2
   1  15  -2 164.720 79.6579   2
  -1  15   2 202.567 90.0671   2
   1  15  -2 219.967 91.2578   8
   1  15  -1 9.83387 66.6664   2
  -1  15   1 52.6009 47.4361   2
   1  15  -1 194.770 98.3217   8
   1  15   0 282.317 99.2628   2
  -1  15   0 256.432 108.995   2
   1  15   1 605.000 138.284   2
  -1  15  -1 890.899 188.288   2
   1  15   2 264.142 96.7108   2
  -1  15  -2 9.02188 55.7992   2
   1  15   3 566.339 149.355   2
  -1  15  -3 496.976 143.057   2
   1  15   4-26.1191 59.8295   2
  -1  15  -4-50.0913 51.9628   2
  -1  15  -5 392.763 129.131   2
   1  15   5 350.777 118.251   2
   1  15   6 846.963 178.628   2
   1  15   7 236.420 94.3798   2
   1  15   8 1179.38 212.776   2
  -2   0  25 30.3664 49.0885   4
   2   0 -24 249.480 95.9758   3
   2   0 -24 508.469 125.758   8
  -2   0  24 341.360 118.915   4
   2   0 -23 65.1396 51.2574   8
   2   0 -23 17.7174 41.6871   3
  -2   0  23-20.6130 46.1270   4
   2   0 -22 128.387 77.3767   3
  -2   0  22 191.888 88.4315   4
  -2   0  21 20.7208 41.2629   4
   2   0 -21-17.2841 50.0889   3
   2   0 -20 388.188 103.515   3
  -2   0  20 379.820 115.093   4
  -2   0  19-63.0697 75.6998   4
   2   0 -19-27.4523 43.5976   3
  -2   0  18 2382.43 273.569   4
   2   0 -18 2820.12 253.292   3
  -2   0  17 38.5528 47.0089   4
   2   0 -17-23.1421 36.1297   3
   2   0 -16 13327.2 526.665   3
  -2   0  16 13530.3 622.417   4
  -2   0  16 12856.4 382.972   6
  -2   0  15 23.4479 36.4117   2
  -2   0  15-3.62590 31.9108   4
   2   0 -15-8.29723 41.8404   1
   2   0 -15 3.26944 20.6417   3
  -2   0  15 17.5632 13.9040   6
  -2   0  14 954.292 88.6499   6
  -2   0  14 911.221 138.570   2
  -2   0  14 984.399 152.422   4
   2   0 -14 970.181 157.499   1
   2   0 -14 1019.02 130.984   3
  -2   0  13-5.19577 11.9025   6
  -2   0  13-0.17323 36.7684   4
   2   0 -13 16.4207 32.8495   1
   2   0 -13-6.50417 24.8295   3
  -2   0  13 2.40109 25.1274   2
  -2   0  12 903.953 76.9767   6
   2   0 -12 822.042 129.076   1
  -2   0  12 1006.22 131.283   2
  -2   0  11 66.5839 34.7702   2
   2   0 -11 46.1580 35.8272   1
  -2   0  11 28.7270 18.0452   6
  -2   0  10 791.656 104.288   2
   2   0 -10 778.561 114.032   1
  -2   0  10 760.859 63.2891   5
   2   0 -10 726.140 91.5393   3
  -2   0  10 795.630 63.0287   6
   2   0  -9 41.8647 24.4334   3
   2   0  -9 49.9636 28.0415   1
  -2   0   9 46.2658 31.9404   2
  -2   0   9 74.0669 18.4440   6
  -2   0   9 55.3016 19.6454   5
  -2   0   8 10925.2 278.928   5
   2   0  -8 11605.0 408.776   1
  -2   0   8 11930.8 380.679   2
   2   0  -8 11589.2 363.653   8
  -2   0   8 11986.8 241.228   6
   2   0  -8 11031.6 328.927   3
   2   0  -7 6.81536 22.9088   8
  -2   0   7 11.4461 14.3559   5
   2   0  -7 0.61931 24.3828   1
  -2   0   7-2.11736 17.5143   3
   2   0  -7 39.7181 25.0452   3
   2   0  -7 30.5231 16.7552   5
   2   0  -6 35841.5 675.243   8
   2   0  -6 35346.1 605.831   3
  -2   0   6 35098.6 610.703   3
   2   0  -6 35394.4 606.322   5
  -2   0   6 34943.5 603.652   5
   2   0  -6 35214.3 704.331   1
  -2   0   5 83.8403 24.5604   3
   2   0  -5 69.0625 21.7226   3
  -2   0   5 78.6339 26.3204   5
   2   0  -5 80.8320 25.2678   5
   2   0  -5 36.0378 22.8033   8
   2   0  -5 40.0226 26.8887   1
  -2   0   4 55216.2 856.458   1
  -2   0   4 54239.8 762.096   3
   2   0  -4 54306.2 760.121   3
  -2   0   4 54869.4 875.146   8
   2   0  -4 55618.5 847.574   5
   2   0  -4 54307.6 858.120   1
   2   0  -4 55416.4 879.458   8
   2   0  -3 65.4689 20.7414   1
   2   0  -3 98.2889 29.8868   5
   2   0  -3 66.0206 27.9567   8
   2   0  -3 76.4308 13.9831   3
  -2   0   3 49.1479 12.2981   3
  -2   0   3 69.0395 23.7632   1
   2   0  -2 1216.04 61.7193   1
  -2   0   2 1177.97 60.6010   1
   2   0  -2 1173.01 85.4225   8
   2   0  -2 1197.84 85.0883   5
  -2   0   1 62.4716 22.3148   4
   2   0  -1 40.3668 26.7901   8
   2   0  -1 65.5144 28.2164   5
   2   0  -1 54.3869 23.0216   7
  -2   0   0 22010.0 351.034   4
   2   0   0 22328.2 444.654   7
  -2   0   0 22651.8 368.040   2
   2   0   0 22355.1 439.611   5
  -2   0   0 21391.7 401.041   6
   2   0   0 22144.1 431.614   8
   2   0   1 144.262 24.9390   2
  -2   0  -1 133.477 25.7918   2
   2   0   1 109.021 30.7178   7
  -2   0  -1 128.327 28.0997   6
   2   0   1 143.475 30.9060   5
  -2   0  -1 146.156 23.0320   3
   2   0   2 89349.1 1296.17   7
   2   0   2 95807.8 1247.05   2
   2   0   2 90917.5 1282.59   5
  -2   0  -2 93092.0 1238.39   2
  -2   0  -2 90630.7 1215.06   3
  -2   0  -2 90110.0 1286.20   6
  -2   0  -3 35.8073 24.3060   6
  -2   0  -3 39.1829 22.7089   3
   2   0   3 37.8335 17.3791   5
   2   0   3 57.2857 20.2066   2
  -2   0  -3 58.8442 24.2654   5
  -2   0  -3 45.8034 19.1252   2
   2   0   3 42.2775 22.9287   7
   2   0   4 5834.73 142.688   4
   2   0   4 5822.35 229.010   7
  -2   0  -4 6455.15 230.142   6
   2   0   4 6360.42 204.457   5
  -2   0  -4 6117.59 217.542   2
   2   0   4 6101.05 220.161   2
  -2   0  -4 6189.85 214.461   3
  -2   0  -4 6021.02 197.756   5
  -2   0  -5 141.031 37.5087   2
  -2   0  -5 56.1493 20.3149   3
   2   0   5 105.942 33.8008   2
   2   0   5 129.065 26.7224   4
  -2   0  -5 91.2645 24.8164   5
   2   0   5 89.6109 25.8905   5
   2   0   5 46.1891 30.6039   7
  -2   0  -5 150.079 41.1423   6
  -2   0  -6 1141.79 105.337   3
  -2   0  -6 1179.63 105.234   6
   2   0   6 1191.51 111.214   2
  -2   0  -6 1167.95 113.454   1
   2   0   6 1267.01 110.551   7
   2   0   6 1140.25 78.7883   4
  -2   0  -6 1075.87 103.723   2
  -2   0  -6 1081.05 80.1347   5
   2   0   7 84.9381 30.1108   6
   2   0   7 71.2171 28.8896   7
   2   0   7 72.7958 33.9367   2
  -2   0  -7 99.6065 38.0694   2
   2   0   7 62.6010 21.8066   4
  -2   0  -7 96.8688 23.6420   5
  -2   0  -7 74.2468 26.7609   1
  -2   0  -7 127.055 44.3260   6
   2   0   8 366.416 67.0381   6
  -2   0  -8 480.246 82.6664   1
  -2   0  -8 445.308 49.5437   5
   2   0   8 356.265 56.1193   4
  -2   0  -8 325.792 66.8340   2
  -2   0  -8 426.030 72.4184   6
   2   0   8 440.207 77.0401   2
   2   0   8 374.113 74.6338   7
  -2   0  -9 24.6915 30.2068   2
   2   0   9 36.9833 31.1925   2
  -2   0  -9 25.0906 24.4249   1
  -2   0  -9 56.1490 31.0507   6
   2   0   9 18.1191 21.0632   4
   2   0   9 53.6912 37.6001   6
  -2   0  -9 17.4563 14.2909   5
  -2   0 -10 354.326 69.5514   6
   2   0  10 245.141 54.8760   4
  -2   0 -10 261.019 65.2809   2
  -2   0 -10 310.295 77.9328   1
   2   0  10 312.807 75.2164   2
  -2   0 -10 283.592 37.3564   5
   2   0  10 254.708 60.7234   6
   2   0  11-16.3417 30.9195   6
   2   0  11 35.9032 34.6813   2
  -2   0 -11 42.2988 36.7530   2
  -2   0 -11 15.0397 24.7413   3
  -2   0 -11-32.2286 44.5011   1
   2   0  11-16.8315 28.6384   4
  -2   0 -11 2.73141 19.0660   6
  -2   0 -12 2967.09 240.045   2
  -2   0 -12 3326.53 271.489   1
   2   0  12 2997.89 206.550   4
   2   0  12 3178.49 222.030   6
  -2   0 -12 3061.74 215.222   6
  -2   0 -12 3199.38 237.521   3
   2   0  12 2977.18 241.144   2
  -2   0 -13 6.41920 33.9116   3
  -2   0 -13-24.8475 34.3187   1
   2   0  13 38.5999 27.2179   6
   2   0  13 108.185 63.1692   2
  -2   0 -13 30.8819 29.4147   6
  -2   0 -14 10682.6 441.187   6
  -2   0 -14 10801.1 485.557   3
   2   0  14 11524.2 525.154   2
  -2   0 -14 10392.1 538.282   1
  -2   0 -15 2.16728 31.3957   6
  -2   0 -15-1.76166 33.1460   3
   2   0  15-25.5474 34.4824   4
  -2   0 -16 622.054 126.319   3
   2   0  16 532.518 106.454   4
   2   0  17-25.5488 50.2919   4
  -2   0 -17-39.0235 64.0286   3
   2   0  18 475.858 106.089   4
  -2   0 -18 408.358 106.754   3
  -2   0 -19-60.5058 51.2646   3
   2   0  19-29.4226 46.7770   4
  -2   0 -20 268.938 94.3404   3
   2   0  20 295.750 103.970   7
   2   0  20 258.079 85.1533   4
   2   0  21-49.6963 40.5255   7
  -2   0 -21 1.88424 55.9160   3
   2   0  21 33.1338 36.5016   4
   2   0  22 959.038 190.838   7
   2   0  22 798.260 161.569   4
  -2   0 -22 1093.34 197.930   3
   2   0  23 9.66009 37.6842   4
   2   0  23-118.523 73.2510   7
   2   0  24 584.663 151.432   7
  -2   1  25 333.393 132.453   4
  -2  -1  25 420.024 140.713   4
   2   1 -24 1216.20 200.201   3
   2  -1 -24 1261.13 210.025   3
  -2  -1  24 1158.27 228.725   4
  -2   1  24 1211.07 230.784   4
   2  -1 -23 109.877 52.7173   8
  -2  -1  23 125.470 77.1794   4
  -2   1  23 5.99043 55.3307   4
   2  -1 -23 125.777 70.4787   3
   2   1 -23 79.2737 64.7740   3
  -2   1  22 958.641 194.127   4
   2  -1 -22 1111.21 186.760   3
   2  -1 -22 1085.91 159.261   8
  -2  -1  22 1067.14 206.360   4
   2   1 -22 959.013 169.380   3
  -2   1  21 777.324 179.006   4
  -2  -1  21 906.879 181.023   4
   2  -1 -21 964.900 165.909   3
   2   1 -21 723.453 146.935   3
   2  -1 -21 873.108 138.177   8
  -2   1  20 74.4148 63.6501   4
  -2  -1  20-26.3834 26.3851   6
  -2  -1  20 113.451 65.8727   4
   2  -1 -20 64.7973 51.1181   3
   2   1 -20 59.6080 33.5353   3
   2  -1 -20 51.2541 41.1719   8
   2   1 -19 193.765 68.8496   3
  -2   1  19 125.075 76.7660   4
  -2  -1  19 290.493 110.199   4
   2  -1 -19 171.455 72.2722   3
  -2  -1  19 222.954 55.1503   6
   2  -1 -19 216.460 61.5210   8
  -2  -1  18 28.5632 27.3605   6
  -2   1  18-34.6686 48.8927   4
   2   1 -18 23.2573 32.7687   3
  -2  -1  18-27.7196 63.6726   4
   2  -1 -18 2.22628 29.1491   3
  -2  -1  17 1630.00 219.284   4
   2  -1 -17 1096.66 153.864   3
   2   1 -17 1245.96 161.776   3
  -2   1  17 1236.99 190.325   4
  -2  -1  17 1446.23 132.719   6
  -2  -1  16 1028.78 108.833   6
  -2   1  16 977.992 166.405   4
  -2  -1  16 998.550 169.953   4
   2  -1 -16 1005.67 143.816   3
   2   1 -16 1112.44 148.277   3
   2  -1 -15 6446.40 417.851   1
  -2   1  15 6331.08 380.160   2
  -2  -1  15 5724.41 251.249   6
  -2  -1  15 5863.21 364.982   2
  -2   1  15 6072.73 394.309   4
   2   1 -15 5797.55 396.604   1
  -2  -1  15 5988.85 397.027   4
   2   1 -15 6011.45 332.939   3
   2  -1 -15 6468.02 348.330   3
   2   1 -14 1125.18 167.241   1
  -2   1  14 1488.22 186.294   4
  -2   1  14 1279.82 146.551   3
  -2  -1  14 1185.64 107.960   6
  -2   1  14 1268.90 162.277   2
   2   1 -14 1241.97 144.091   3
   2  -1 -14 1116.29 140.096   3
  -2  -1  14 1058.57 147.868   2
  -2  -1  14 1228.25 171.941   4
   2  -1 -14 1276.39 176.626   1
   2  -1 -13 2421.26 191.879   3
   2   1 -13 2188.27 180.880   3
  -2  -1  13 2171.29 138.613   6
  -2   1  13 2275.80 226.379   4
  -2  -1  13 2453.12 237.260   4
  -2  -1  13 2449.86 217.291   2
  -2   1  13 2397.79 213.247   2
   2  -1 -13 2623.29 241.827   1
  -2   1  13 2333.76 190.598   3
   2   1 -13 2293.70 227.228   1
  -2  -1  13 1964.47 94.2550   5
  -2  -1  12 490.970 49.7188   5
  -2   1  12 427.949 88.6353   2
  -2  -1  12 568.222 67.5015   6
   2   1 -12 599.791 111.324   1
   2  -1 -12 531.554 86.4945   3
  -2   1  12 549.821 88.0017   3
   2  -1 -12 615.779 110.546   1
   2  -1 -12 500.915 52.4831   5
  -2  -1  12 488.977 94.9360   2
  -2  -1  11 49.3597 18.3661   5
   2   1 -11 25.3746 30.6774   1
  -2  -1  11 71.7886 25.5761   6
  -2  -1  11 148.334 52.2630   2
  -2   1  11 43.9086 25.4221   3
  -2   1  11 104.670 44.9519   2
   2  -1 -11 66.8081 26.7790   8
   2  -1 -11 59.0640 23.5747   5
   2  -1 -11 39.1253 31.7772   1
   2   1 -10 2177.60 153.943   3
   2  -1 -10 1249.91 114.413   8
   2   1 -10 2075.58 189.811   1
   2  -1 -10 1274.47 121.057   3
  -2  -1  10 1899.59 105.282   5
  -2  -1  10 1921.17 182.041   1
  -2  -1  10 2008.64 169.260   2
   2  -1 -10 1052.91 132.948   1
  -2   1  10 1369.99 124.662   3
   2  -1  -9 33830.9 682.612   8
  -2  -1   9 35031.4 605.895   5
   2   1  -9 34883.7 701.585   3
  -2  -1   9 35944.9 838.059   1
  -2   1   9 34597.4 709.261   3
   2   1  -9 35153.0 828.205   1
   2  -1  -9 35083.1 817.191   1
   2  -1  -9 35653.0 711.747   3
  -2  -1   9 35165.5 769.362   2
   2  -1  -9 34317.3 605.663   5
   2  -1  -8 1101.46 83.3423   5
  -2   1   8 1213.17 102.334   3
  -2  -1   8 1101.85 123.066   1
   2   1  -8 1193.55 126.553   1
   2  -1  -8 1092.13 124.441   4
   2  -1  -8 1253.48 102.132   8
  -2  -1   8 1086.07 82.0767   5
   2   1  -8 1093.55 98.3855   3
   2  -1  -8 1093.39 97.5414   3
  -2  -1   8 1160.88 112.023   2
   2  -1  -8 1133.42 123.016   1
  -2  -1   7 611.090 77.0596   2
   2  -1  -7 169.393 44.8195   1
   2   1  -7 480.143 59.1642   3
  -2  -1   7 389.254 49.9143   5
   2  -1  -7 121.209 32.0990   3
  -2  -1   7 467.205 77.9645   1
  -2   1   7 163.879 41.0911   3
   2  -1  -7 148.161 33.2440   5
   2  -1  -7 131.983 42.7354   4
   2   1  -7 413.518 71.2812   1
   2  -1  -7 140.226 37.0313   8
   2  -1  -6 39508.8 659.453   5
  -2   1   6 38617.9 658.221   3
  -2  -1   6 38061.3 697.600   2
   2  -1  -6 38610.5 670.293   8
  -2  -1   6 38146.3 763.222   1
  -2  -1   6 37852.1 652.957   5
   2  -1  -6 38894.9 792.935   4
  -2   1   6 37593.1 650.795   5
   2   1  -6 37313.0 756.251   1
   2  -1  -6 39713.8 662.477   3
   2   1  -6 36986.3 645.071   3
   2   1  -6 37294.9 748.999   8
  -2   1   5 18530.9 372.612   3
  -2  -1   5 18623.1 453.227   1
   2  -1  -5 18403.2 397.079   5
   2  -1  -5 18516.2 373.219   3
   2   1  -5 18896.4 455.562   1
  -2   1   5 18053.3 393.416   5
   2  -1  -5 17774.4 469.701   4
  -2  -1   5 18883.5 400.249   5
  -2   1   5 17765.5 391.802   8
   2   1  -5 19143.5 465.552   8
   2  -1  -5 18507.0 397.135   8
  -2  -1   5 18903.6 405.462   2
   2  -1  -4 6095.46 199.881   5
   2  -1  -4 6067.23 232.441   4
   2  -1  -4 5685.18 163.826   3
  -2   1   4 5888.38 192.504   8
   2  -1  -4 6002.69 190.256   8
  -2   1   4 5870.93 163.033   3
   2  -1  -3 138879. 1781.22   8
   2  -1  -3 137792. 1815.61   5
   2  -1  -3 134804. 1848.43   4
  -2   1   3 132683. 1694.31   3
  -2  -1   3 134235. 1799.10   1
  -2   1   3 131613. 1782.52   8
   2   1  -3 136727. 1798.63   1
  -2   1   3 130428. 1642.22   6
   2   1  -3 137210. 1865.55   8
   2  -1  -3 132547. 1703.16   3
  -2  -1   3 139370. 1718.10   2
   2  -1  -2 299.288 45.9229   4
   2  -1  -2 393.655 54.4037   5
  -2  -1   2 462.662 46.9047   1
   2   1  -2 507.458 48.2465   1
   2   1  -2 505.999 61.3380   8
  -2   1   2 330.617 30.5802   3
   2  -1  -2 303.869 40.2347   8
  -2   1   2 352.770 31.4635   6
   2   1  -1 39269.6 671.623   8
   2   1  -1 38799.6 575.495   1
   2  -1  -1 37020.0 612.820   4
  -2  -1   1 37623.8 581.995   1
  -2   1   1 38406.4 573.205   6
   2  -1  -1 38165.5 653.889   5
   2   1  -1 38621.5 516.211   3
   2   1  -1 39619.2 669.409   7
  -2   1   1 37587.7 614.176   4
   2  -1   0 13050.6 320.815   5
   2   1   0 14272.9 259.686   1
   2  -1   0 12855.9 314.516   7
   2  -1   0 12947.1 272.410   4
   2   1   0 14530.0 343.293   7
  -2  -1   0 14260.9 243.072   3
   2   1   0 14126.2 239.832   3
  -2  -1   0 14325.7 267.359   1
  -2   1   0 12904.4 268.574   4
  -2   1   0 12419.0 281.313   6
   2   1   0 14654.4 340.311   8
   2  -1   1 57901.6 883.023   2
  -2  -1  -1 58109.1 802.101   3
   2  -1   1 58517.2 896.824   5
   2  -1   1 57741.9 881.702   7
   2   1   1 58745.6 800.468   3
   2  -1   1 57434.7 772.843   1
   2   1   1 59606.0 761.880   2
   2   1   1 58982.7 892.631   8
  -2   1  -1 57206.9 772.610   1
  -2   1  -1 60766.8 793.364   4
   2  -1   1 60478.5 797.169   4
   2   1   1 60695.2 919.406   7
  -2   1  -1 57815.0 867.589   6
  -2  -1  -1 59273.2 756.758   2
   2   1   2 92166.8 1280.85   7
   2  -1   2 84809.5 1216.55   7
   2   1   2 93234.2 1146.47   2
   2  -1   2 83873.3 1230.60   2
  -2   1  -2 81012.6 1155.56   1
  -2  -1  -2 90438.9 1176.90   3
  -2   1  -2 84503.4 1226.74   6
   2  -1   2 81000.6 1150.65   1
   2  -1   2 87966.7 1112.85   4
  -2  -1  -2 90862.8 1136.87   2
   2   1   2 91640.2 1234.44   8
   2   1   2 88892.2 1171.10   3
   2  -1   2 84695.1 1227.43   5
  -2  -1  -3 144437. 1829.52   4
  -2  -1  -3 150212. 1921.04   2
   2   1   3 153499. 2044.97   7
   2  -1   3 153451. 2028.61   2
   2   1   3 141437. 1825.86   4
  -2   1  -3 148437. 2010.54   2
   2   1   3 152964. 1929.63   2
  -2   1  -3 145370. 1960.86   1
  -2  -1  -3 145513. 1977.38   5
   2   1   3 147452. 1946.84   3
  -2  -1  -3 151244. 1955.40   3
  -2   1  -3 147767. 1968.62   5
   2  -1   3 151382. 1977.89   5
  -2   1  -3 150491. 2007.50   6
   2  -1   3 144790. 1953.40   1
   2  -1   3 145289. 1977.32   7
  -2  -1  -4 79446.3 1070.34   4
   2  -1   4 83922.4 1209.80   7
   2   1   4 80860.1 1066.15   4
  -2   1  -4 79487.9 1239.74   2
   2  -1   4 81550.6 1173.17   5
   2   1   4 82468.0 1179.51   2
  -2  -1  -4 79651.4 1185.06   3
  -2   1  -4 81593.2 1166.89   5
  -2  -1  -4 79603.9 1174.77   5
   2  -1   4 82728.6 1246.46   2
  -2   1  -4 81392.9 1216.13   1
   2   1   4 80201.8 1186.44   3
  -2  -1  -4 80374.9 1167.44   2
   2   1   4 80049.3 1264.00   7
  -2  -1  -4 79987.6 1229.33   6
  -2   1  -4 82714.8 1231.07   6
  -2   1  -5 36784.1 703.123   6
  -2   1  -5 36734.9 693.582   3
   2  -1   5 36561.1 724.818   2
  -2  -1  -5 36549.6 665.914   2
   2   1   5 37248.7 732.847   7
  -2  -1  -5 36773.1 586.927   4
   2   1   5 36961.4 682.451   3
   2   1   5 36979.9 678.659   2
  -2   1  -5 36487.3 717.803   1
  -2   1  -5 36582.4 718.892   2
   2   1   5 36357.6 581.434   4
  -2   1  -5 36017.8 624.793   5
  -2  -1  -5 36423.7 685.191   3
   2  -1   5 35102.5 679.286   7
  -2  -1  -5 35580.7 636.758   5
   2  -1   5 36484.1 634.148   5
  -2  -1  -5 36982.6 704.582   6
  -2   1  -6 1485.33 129.771   1
   2   1   6 1021.76 105.405   7
  -2  -1  -6 995.956 100.197   3
   2  -1   6 1607.07 100.856   5
   2   1   6 972.644 94.8420   2
   2  -1   6 1513.90 129.839   2
  -2   1  -6 1505.41 127.031   2
   2   1   6 877.515 72.5817   4
  -2   1  -6 1680.88 129.065   6
   2  -1   6 1644.18 120.547   7
  -2  -1  -6 914.823 75.3931   4
  -2  -1  -6 853.298 75.9566   5
  -2  -1  -6 931.262 95.8965   6
  -2  -1  -6 800.354 92.4510   2
  -2   1  -6 1606.81 98.8789   5
   2   1   6 914.138 95.8439   3
   2   1   7 22509.1 578.790   7
   2  -1   7 23479.3 547.608   7
   2   1   7 22891.7 553.147   2
  -2  -1  -7 22403.7 543.392   6
  -2   1  -7 22709.5 551.482   6
  -2  -1  -7 22061.3 538.940   2
  -2   1  -7 22982.5 596.887   1
  -2   1  -7 23281.5 579.455   2
   2  -1   7 23459.5 595.290   2
   2   1   7 22032.9 546.252   3
   2  -1   7 22773.6 451.709   5
  -2  -1  -7 21847.5 452.350   5
  -2  -1  -7 23109.3 553.006   3
   2  -1   7 22928.9 555.951   6
   2   1   7 21579.6 465.284   4
  -2   1  -8 14994.0 497.041   1
  -2   1  -8 15053.1 476.384   2
   2   1   8 14374.9 447.169   3
   2  -1   8 15527.4 493.051   2
   2  -1   8 15652.8 347.481   5
   2  -1   8 15688.8 458.614   6
  -2   1  -8 15369.8 450.216   6
  -2  -1  -8 14549.3 435.259   6
   2   1   8 14013.8 379.538   4
   2  -1   8 15183.3 453.403   7
   2   1   8 14677.3 458.423   2
  -2  -1  -8 14579.8 346.053   5
   2  -1   9 4612.62 244.675   7
   2   1   9 4879.26 264.057   2
  -2   1  -9 4524.61 240.877   6
  -2   1  -9 4744.13 279.802   1
  -2  -1  -9 4407.11 234.862   6
  -2  -1  -9 4521.45 172.965   5
   2  -1   9 4617.53 171.525   5
  -2   1  -9 4452.13 258.403   2
   2   1   9 4355.40 211.155   4
   2   1   9 4920.52 259.550   3
   2  -1   9 4662.89 247.578   6
   2  -1   9 4568.91 267.163   2
  -2   1 -10 973.639 133.636   1
  -2  -1 -10 991.243 111.292   6
   2  -1  10 1056.93 111.074   4
  -2   1 -10 1106.03 136.139   2
  -2  -1 -10 984.054 121.886   3
  -2  -1 -10 879.162 73.0331   5
   2   1  10 961.927 118.738   3
   2  -1  10 1001.92 130.440   2
  -2   1 -10 985.126 116.075   6
   2   1  10 934.167 121.871   2
   2  -1  10 972.141 118.670   6
   2   1  10 915.627 101.819   4
   2   1  11 2578.90 209.701   2
  -2   1 -11 2034.52 202.280   1
   2   1  11 2231.16 191.755   3
  -2  -1 -11 2275.25 218.078   1
  -2  -1 -11 2200.21 188.200   3
   2  -1  11 2349.11 177.395   4
   2   1  11 2172.02 165.776   4
  -2  -1 -11 2193.61 110.514   5
   2  -1  11 2109.17 178.017   6
  -2   1 -11 2005.26 171.548   6
  -2   1 -11 1991.10 181.812   3
  -2   1 -11 2262.09 197.855   2
   2  -1  11 2164.47 202.185   2
  -2  -1 -11 2191.91 173.737   6
  -2  -1 -12 144.345 55.0668   3
   2  -1  12 61.5079 32.0748   4
  -2   1 -12 46.6130 22.4595   3
  -2   1 -12 61.2390 41.4165   2
   2  -1  12 70.2064 40.8828   2
   2  -1  12 134.698 52.9844   6
  -2  -1 -12 213.989 61.5751   6
   2   1  12 124.049 41.4298   4
   2   1  12 213.204 68.2453   2
  -2  -1 -12 157.992 27.5939   5
   2   1  12 179.055 58.0180   3
  -2  -1 -12 174.442 70.8010   1
  -2   1 -12 41.5228 37.4816   1
  -2  -1 -13 4258.62 286.190   3
   2   1  13 3754.24 281.998   2
  -2  -1 -13 4009.24 314.959   1
  -2   1 -13 3608.16 276.475   2
  -2   1 -13 4164.85 317.326   1
   2  -1  13 4055.73 264.506   6
   2  -1  13 4045.02 299.039   2
  -2   1 -13 3944.68 277.755   3
  -2  -1 -13 4131.38 255.711   6
  -2   1 -14 3832.51 319.037   1
   2  -1  14 4349.79 321.173   2
  -2  -1 -14 4078.99 261.973   6
   2   1  14 4019.15 303.739   2
  -2  -1 -14 3957.27 289.749   3
  -2   1 -14 3804.43 281.157   3
   2  -1  14 3899.44 266.799   6
  -2  -1 -14 4044.00 328.997   1
  -2   1 -14 3994.02 301.406   2
  -2  -1 -15 884.965 141.565   3
   2   1  15 886.705 128.332   4
   2  -1  15 870.403 132.386   4
   2  -1  15 743.095 114.761   6
  -2  -1 -15 832.504 123.016   6
  -2   1 -15 728.951 137.533   2
  -2   1 -15 783.983 132.479   3
   2  -1  16 4258.64 294.091   6
  -2  -1 -16 4113.73 316.222   3
   2   1  16 3999.63 286.218   4
  -2   1 -16 4369.11 324.166   3
   2  -1  16 4255.06 297.287   4
  -2  -1 -16 3886.62 273.379   6
   2   1  17 1390.74 174.737   4
  -2   1 -17 1132.77 174.683   3
   2  -1  17 1542.98 186.393   4
  -2  -1 -17 1507.96 169.910   6
  -2  -1 -17 1436.26 193.137   3
   2   1  18 33.8271 31.9573   4
   2  -1  18-17.2975 43.1686   4
  -2  -1 -18-24.2017 39.2743   3
  -2   1 -18 38.9218 47.7564   3
   2   1  19 4.61904 30.6273   4
   2  -1  19 42.6024 40.0464   4
  -2  -1 -19 39.3790 46.8187   3
  -2   1 -19 153.128 83.1830   3
   2  -1  19 42.6135 50.5387   7
   2  -1  20 153.861 91.3630   7
  -2  -1 -20 198.201 81.2751   3
   2   1  20 138.296 61.6260   4
  -2   1 -20 297.015 97.0439   3
   2  -1  20 288.944 89.4235   4
   2   1  21 290.420 90.6510   4
  -2  -1 -21 116.007 75.6595   3
  -2   1 -21 198.656 72.9356   3
   2  -1  21 258.691 98.9463   7
   2  -1  21 158.923 77.8428   4
   2   1  21 259.523 102.421   7
  -2   1 -22 78.9469 37.5229   3
   2   1  22 222.896 80.3423   4
  -2  -1 -22 97.7421 81.5403   3
   2  -1  22 171.856 83.7405   7
   2  -1  22 104.922 53.5316   4
   2   1  22 371.478 123.195   7
   2  -1  23 190.924 88.7512   7
   2   1  23 167.115 103.010   7
   2  -1  23 171.159 68.8600   4
   2   1  23 278.484 97.6548   4
   2  -1  24-16.5822 58.5544   7
  -2   2  25 299.012 107.023   4
  -2  -2  25 242.611 113.784   4
  -2   2  24 245.484 109.891   4
   2  -2 -24 185.141 93.3295   3
   2   2 -24 339.563 112.548   3
  -2  -2  24 246.124 106.095   4
   2   2 -23 0.51784 34.7622   3
  -2   2  23 18.5614 50.7877   4
   2  -2 -23 85.2728 65.8296   3
   2   2 -22-12.4015 53.9476   3
   2  -2 -22 13.8944 32.5441   3
  -2  -2  22 161.328 79.2558   4
  -2   2  22 0.95727 64.9038   4
  -2   2  21-28.2714 68.6577   4
   2  -2 -21 101.221 69.1400   3
   2  -2 -21 86.4206 46.9451   8
  -2  -2  21 135.964 72.4643   4
   2   2 -21 226.806 76.2876   3
  -2   2  20 169.102 80.8016   4
  -2  -2  20 429.059 82.1222   6
  -2  -2  20 419.650 122.142   4
   2  -2 -20 256.784 90.2485   3
   2   2 -20 368.066 104.831   3
   2  -2 -20 239.978 71.7156   8
  -2  -2  19 82.4325 30.4976   6
   2   2 -19 35.1747 29.6279   3
   2  -2 -19 8.84279 44.6255   3
  -2  -2  19 5.41192 50.2129   4
  -2   2  19 8.23311 39.7175   4
   2  -2 -19 92.1229 47.0465   8
  -2  -2  18-6.86293 35.7618   4
  -2  -2  18 103.349 42.1195   6
  -2   2  18 133.362 71.1977   4
   2  -2 -18 79.1949 42.6236   8
   2   2 -18 63.3358 40.2204   3
   2  -2 -18 69.0165 48.8046   3
   2  -2 -17 280.506 79.5951   3
  -2  -2  17 499.616 120.989   4
  -2   2  17 267.864 100.198   4
   2  -2 -17 336.085 72.7391   8
  -2  -2  17 683.631 97.0954   6
   2   2 -17 503.024 105.097   3
   2  -2 -16 620.299 114.335   3
   2   2 -16 1058.91 146.912   3
  -2  -2  16 1205.39 123.994   6
  -2   2  16 582.387 127.745   4
   2  -2 -16 666.946 99.3181   8
  -2  -2  16 1169.80 180.697   4
   2  -2 -15 2131.12 106.024   5
   2   2 -15 2611.76 218.552   3
  -2   2  15 2619.54 222.353   3
  -2   2  15 2130.17 237.712   4
   2   2 -15 2366.39 256.349   1
   2  -2 -15 2264.16 210.463   3
   2  -2 -15 2419.61 257.118   1
  -2  -2  15 2566.28 240.182   2
   2  -2 -15 2323.17 174.894   8
  -2  -2  15 2424.19 252.580   4
  -2  -2  15 1858.71 87.3028   5
  -2  -2  15 2412.32 171.338   6
  -2  -2  14 2459.93 166.700   6
  -2  -2  14 2295.81 110.165   5
  -2   2  14 2362.10 201.711   3
   2  -2 -14 2269.37 165.292   8
  -2   2  14 2189.64 229.032   4
   2   2 -14 2570.81 207.875   3
   2  -2 -14 2158.78 195.214   3
   2  -2 -14 2426.55 244.891   1
  -2  -2  14 2468.51 231.241   2
  -2   2  14 2374.13 228.260   2
  -2  -2  14 2706.14 259.766   4
   2   2 -14 2653.72 261.941   1
   2  -2 -14 2030.54 111.793   5
  -2  -2  13 3828.13 301.196   1
  -2  -2  13 3787.70 153.658   5
   2  -2 -13 3559.44 155.812   5
   2   2 -13 3949.09 249.795   3
  -2   2  13 3816.43 251.430   3
   2   2 -13 4114.68 311.536   1
  -2  -2  13 4196.25 212.514   6
  -2   2  13 3775.40 290.045   4
   2  -2 -13 3729.99 204.174   8
  -2  -2  13 3947.99 276.466   2
   2  -2 -13 3632.88 288.397   1
   2  -2 -13 3861.54 249.848   3
  -2   2  13 4048.63 281.193   2
   2  -2 -12 163.758 37.1843   5
   2   2 -12 295.838 78.5573   1
  -2  -2  12 264.887 41.6449   5
   2  -2 -12 126.219 55.0497   1
   2  -2 -12 184.429 55.9527   3
  -2   2  12 119.229 48.7873   4
   2   2 -12 285.509 64.1571   3
   2  -2 -12 128.046 38.5511   8
  -2  -2  12 320.022 88.7369   1
   2  -2 -12 161.206 58.2982   4
  -2   2  12 130.547 46.4566   3
  -2  -2  12 276.266 68.7794   2
  -2  -2  11 605.649 65.1574   5
   2  -2 -11 856.435 89.1280   8
  -2   2  11 793.273 103.298   3
  -2  -2  11 620.287 114.681   1
   2  -2 -11 898.661 80.6327   5
   2   2 -11 528.421 103.435   1
   2  -2 -11 929.801 133.421   4
  -2  -2  11 529.550 95.8125   2
   2   2 -10 6288.79 342.978   1
  -2  -2  10 5927.49 295.541   2
   2  -2 -10 6350.05 235.133   8
   2  -2 -10 6494.60 344.322   4
  -2  -2  10 6016.81 216.107   5
  -2  -2  10 5992.10 334.278   1
   2  -2 -10 6296.40 224.234   5
  -2   2  10 6398.63 282.590   3
   2  -2  -9 6117.69 265.690   3
   2  -2  -9 6080.63 220.805   8
   2  -2  -9 6003.68 223.356   5
   2   2  -9 7581.21 358.229   1
  -2  -2   9 7625.34 316.234   2
   2  -2  -9 6269.50 323.603   4
   2   2  -9 7472.26 284.767   3
  -2  -2   9 7789.54 360.981   1
  -2   2   9 6362.17 267.836   3
   2  -2  -8 112039. 1802.59   4
   2   2  -8 110871. 1679.58   2
  -2  -2   8 113902. 1808.51   1
   2  -2  -8 109041. 1522.21   8
   2   2  -8 111397. 1804.07   1
   2  -2  -8 108692. 1560.93   5
   2  -2  -8 109735. 1635.17   3
  -2  -2   8 111821. 1687.77   2
  -2   2   8 110530. 1627.42   3
   2  -2  -7 59850.9 1001.71   3
  -2  -2   7 60398.7 1025.56   2
   2  -2  -7 59591.3 904.979   8
  -2  -2   7 59098.6 1114.85   1
   2   2  -7 59987.7 1124.30   1
   2  -2  -7 61050.2 1139.77   4
  -2   2   7 60062.0 988.919   3
   2   2  -7 61824.6 1019.04   2
   2  -2  -7 60733.4 967.197   5
   2  -2  -6 3101.67 195.613   4
   2   2  -6 3837.67 177.374   2
   2  -2  -6 3126.83 158.253   3
   2  -2  -6 2992.65 153.610   5
  -2  -2   6 4088.92 219.233   1
  -2   2   6 3044.60 153.576   3
  -2  -2   6 3975.61 182.826   2
   2  -2  -6 3070.22 131.013   8
  -2   2   6 3132.02 134.358   8
   2   2  -6 3953.66 215.598   1
  -2   2   5 15032.4 356.829   3
   2  -2  -5 14751.7 437.068   4
  -2  -2   5 17977.9 461.595   1
  -2   2   5 14555.0 328.990   8
   2   2  -5 17934.8 383.002   2
   2  -2  -5 15186.8 323.002   8
   2  -2  -5 15451.0 384.633   5
   2  -2  -5 15266.5 367.707   3
   2   2  -5 17528.5 454.794   1
  -2  -2   5 17508.8 384.827   2
  -2  -2   4 51335.4 788.969   2
  -2   2   4 52484.0 782.832   8
   2   2  -4 50152.7 886.564   1
  -2  -2   4 49210.8 884.843   1
   2  -2  -4 53512.1 862.792   5
   2  -2  -4 52269.4 769.485   8
   2   2  -4 50272.8 920.919   8
   2   2  -4 50399.9 780.595   2
   2  -2  -4 52527.8 924.165   4
  -2   2   4 51773.2 801.199   3
   2  -2  -4 52630.5 812.483   3
   2   2  -3 13792.5 380.014   8
   2   2  -3 13606.9 268.960   2
  -2   2   3 12861.7 291.816   8
   2  -2  -3 12918.5 342.897   5
  -2  -2   3 13432.1 340.062   7
   2  -2  -3 13098.2 366.982   4
  -2  -2   3 13045.5 349.993   1
  -2  -2   3 13215.3 272.569   2
  -2   2   3 13019.1 298.530   3
   2   2  -3 13060.0 347.319   1
   2   2  -2 3341.86 156.535   7
  -2  -2   2 3541.40 158.319   7
  -2   2   2 3327.21 133.534   3
  -2  -2   2 3440.58 158.377   1
   2  -2  -2 3347.76 116.472   6
   2   2  -2 3683.34 101.057   2
   2   2  -2 3467.75 154.488   1
   2   2  -2 3693.20 178.987   8
   2  -2  -2 3366.46 163.889   4
   2  -2  -2 3655.65 166.335   5
  -2  -2   2 3542.46 102.359   2
  -2   2   2 3384.91 137.407   8
   2   2  -1 71950.5 1108.34   8
   2  -2  -1 73253.8 1102.69   5
  -2  -2   1 71780.0 1066.89   7
   2   2  -1 70362.1 1037.80   1
   2   2  -1 72698.0 1078.58   7
   2  -2  -1 71442.0 955.742   1
   2   2  -1 69036.7 990.173   3
  -2  -2   1 71097.3 1056.41   1
  -2   2   1 72179.1 1068.99   4
   2  -2  -1 72152.4 1078.51   4
   2   2   0 24542.4 492.058   7
   2   2   0 23157.4 420.707   3
   2   2   0 23752.9 446.019   1
  -2  -2   0 23341.6 425.997   3
   2   2   0 24921.6 503.428   8
  -2   2   0 24702.1 465.585   4
   2  -2   0 24327.6 407.567   1
   2  -2   0 24560.2 471.757   4
   2  -2   0 24742.6 503.876   5
  -2  -2   0 23633.2 455.885   1
  -2   2   0 24331.0 394.303   1
   2   2   1 2417.15 111.292   3
  -2   2  -1 2427.93 116.905   7
  -2   2  -1 2465.71 104.456   1
  -2  -2  -1 2431.98 118.221   1
   2  -2   1 2334.92 104.460   1
  -2   2  -1 2454.44 116.388   4
   2  -2   1 2511.80 122.723   4
   2  -2   1 2525.71 143.931   2
  -2  -2  -1 2385.67 112.614   3
   2   2   1 2311.95 130.115   8
   2  -2   1 2400.14 118.157   7
   2   2   1 2449.45 136.463   7
   2  -2   1 2342.10 134.522   5
  -2  -2  -2 86855.6 1190.74   4
   2  -2   2 86759.9 1226.33   1
   2   2   2 86891.6 1254.57   8
   2  -2   2 87846.2 1317.62   2
  -2   2  -2 87398.6 1215.81   7
   2  -2   2 85226.6 1287.74   5
   2   2   2 86541.4 1304.11   7
   2   2   2 87144.2 1144.39   2
   2   2   2 86772.6 1224.64   3
   2  -2   2 90786.8 1224.48   4
   2  -2   2 88918.0 1226.74   7
  -2   2  -2 87952.8 1222.74   1
  -2  -2  -2 86125.1 1232.31   3
   2  -2   3 1987.94 105.577   4
   2   2   3 1947.85 132.363   7
  -2  -2  -3 1840.84 113.434   8
   2   2   3 1947.93 114.205   3
   2   2   3 1852.30 110.647   8
   2  -2   3 2037.91 121.623   5
  -2  -2  -3 1877.21 96.5987   4
   2  -2   3 1902.40 133.581   2
   2  -2   3 1887.78 115.463   1
   2   2   3 1854.32 95.2061   4
  -2   2  -3 2038.40 107.342   7
   2   2   3 1807.11 94.5384   2
  -2  -2  -3 1927.22 115.330   3
  -2   2  -3 1861.84 115.550   1
   2  -2   3 1958.53 108.661   7
   2   2   4 39704.4 668.765   2
  -2  -2  -4 39999.9 643.289   4
  -2   2  -4 38522.0 725.809   1
   2  -2   4 37397.5 660.283   7
  -2   2  -4 37823.4 654.671   7
  -2  -2  -4 39794.5 687.036   8
   2   2   4 39602.8 640.289   4
   2   2   4 39976.0 762.121   7
   2  -2   4 39558.0 696.802   5
   2   2   4 40505.0 709.734   3
   2  -2   4 36760.0 715.908   1
  -2  -2  -4 40761.9 715.647   3
   2  -2   4 37327.4 754.631   2
  -2  -2  -5 62156.5 982.702   8
   2  -2   5 63810.7 991.728   7
   2  -2   5 63978.5 996.240   5
  -2  -2  -5 62846.0 1043.29   3
   2   2   5 62564.2 1003.91   2
  -2   2  -5 64571.4 1081.59   1
   2   2   5 62401.7 952.850   4
  -2  -2  -5 62164.9 954.530   4
   2   2   5 62762.2 1037.71   3
   2   2   5 63850.9 1091.13   7
   2  -2   5 63999.2 1106.89   2
   2  -2   5 63712.3 1077.74   1
   2  -2   6 12960.7 420.288   2
  -2  -2  -6 12886.8 385.203   3
   2   2   6 12840.9 367.599   2
  -2  -2  -6 12494.4 339.351   8
   2  -2   6 12523.3 334.138   5
   2   2   6 13130.4 419.471   7
  -2  -2  -6 12548.4 333.686   4
  -2   2  -6 12702.9 407.054   1
   2   2   6 12640.0 330.256   4
   2   2   6 12927.7 382.531   3
   2  -2   6 12908.1 352.756   7
   2  -2   6 12473.6 403.049   1
  -2  -2  -7 1455.63 129.557   3
  -2  -2  -7 1261.46 119.261   6
   2   2   7 1382.15 124.779   3
   2   2   7 1216.35 115.244   2
  -2  -2  -7 1350.18 108.160   4
  -2   2  -7 1405.37 137.448   1
   2  -2   7 1369.19 101.275   5
   2  -2   7 1292.21 133.891   1
   2   2   7 1239.36 101.926   4
   2  -2   7 1450.64 142.880   2
   2   2   7 1307.78 134.341   7
   2  -2   7 1461.50 117.676   7
   2  -2   8 4823.05 271.043   1
   2  -2   8 5329.14 202.491   5
   2  -2   8 5141.96 235.533   7
   2  -2   8 5494.78 289.653   2
  -2   2  -8 5091.93 281.846   1
   2   2   8 4918.15 251.434   3
   2   2   8 4776.78 217.300   4
  -2  -2  -8 4846.94 222.100   4
   2  -2   8 5100.36 256.671   6
  -2  -2  -8 4762.29 240.698   6
   2   2   8 4728.15 244.906   2
   2  -2   9 217.687 42.3038   5
  -2  -2  -9 383.293 69.6724   6
   2   2   9 353.275 69.1309   3
   2  -2   9 289.246 69.4141   2
   2  -2   9 239.060 57.4868   6
  -2  -2  -9 289.137 57.1364   4
   2   2   9 306.372 57.3937   4
  -2  -2  -9 335.097 68.1577   3
  -2   2  -9 283.064 70.1118   1
   2   2   9 375.280 72.4067   2
   2  -2   9 147.863 53.2399   7
  -2  -2 -10 1261.00 139.890   3
   2  -2  10 1473.11 100.703   5
   2   2  10 1192.42 135.976   3
  -2  -2 -10 1230.88 96.4862   5
   2   2  10 1265.76 123.550   4
  -2  -2 -10 1376.59 135.313   6
  -2  -2 -10 1288.36 126.407   4
  -2   2 -10 1308.80 147.117   2
   2  -2  10 1610.76 169.176   2
   2  -2  10 1409.49 134.613   7
   2   2  10 1332.01 142.559   2
  -2   2 -10 1501.59 168.093   1
   2  -2  10 1452.07 146.664   6
   2  -2  11 18769.3 550.125   7
  -2  -2 -11 17357.1 576.739   3
   2  -2  11 18676.0 573.029   6
   2  -2  11 18120.2 396.145   5
  -2  -2 -11 17008.1 402.721   5
   2  -2  11 19112.5 637.443   2
  -2   2 -11 18629.4 610.152   2
   2   2  11 18003.1 579.877   3
  -2  -2 -11 17414.2 531.353   6
   2   2  11 18227.4 589.413   2
  -2   2 -11 18776.4 597.250   3
  -2   2 -11 18910.5 650.802   1
   2   2  11 16706.8 509.087   4
  -2   2 -12 28.1217 28.8035   1
   2  -2  12 28.8353 15.0066   5
  -2  -2 -12 66.2652 41.4461   6
  -2  -2 -12 51.2203 22.9296   5
  -2   2 -12 28.5927 30.9720   3
  -2  -2 -12 103.624 50.6410   3
   2   2  12 49.5440 35.5831   2
  -2   2 -12-10.0119 37.0317   2
   2  -2  12 23.9450 23.6748   6
   2  -2  12 60.9300 23.7852   2
   2   2  12 24.1914 27.8318   3
   2  -2  12 22.3364 40.4359   7
   2   2  13 194.089 62.5120   2
   2  -2  13 208.327 59.7640   6
  -2   2 -13 147.803 64.9900   2
  -2   2 -13 189.814 66.4629   3
  -2  -2 -13 203.452 68.9609   3
  -2   2 -13 227.195 72.3067   1
   2  -2  13 215.831 61.9764   7
  -2  -2 -13 170.271 55.8403   6
   2  -2  13 147.238 55.6809   2
  -2  -2 -13 179.248 32.3463   5
   2   2  13 255.927 73.7674   3
   2  -2  14 1765.09 179.490   7
  -2  -2 -14 1574.91 184.368   3
  -2  -2 -14 1388.06 81.5788   5
   2  -2  14 1617.53 172.991   4
  -2   2 -14 1528.37 199.750   1
   2  -2  14 1754.22 181.484   6
  -2   2 -14 1501.15 178.442   3
  -2  -2 -14 1692.06 167.739   6
   2   2  14 1424.86 180.457   2
  -2   2 -14 1608.71 194.396   2
   2  -2  15 2570.84 225.707   7
  -2  -2 -15 2271.45 199.777   6
   2  -2  15 2076.11 202.857   6
   2  -2  15 2108.19 205.247   4
  -2   2 -15 2079.03 220.369   3
   2   2  15 2175.64 203.577   4
  -2  -2 -15 2159.53 221.794   3
  -2   2 -15 2048.65 226.648   2
  -2  -2 -16 28.9152 38.1679   3
   2  -2  16 70.8997 49.4195   7
  -2   2 -16 32.8468 31.0052   2
  -2  -2 -16 77.8688 45.7687   6
  -2   2 -16-26.5115 44.8934   3
   2   2  16 8.29725 37.7866   4
   2  -2  16 55.3222 47.4448   4
   2  -2  17 37.2565 48.9813   7
  -2   2 -17 9.89672 54.8363   2
  -2  -2 -17 51.5340 43.1357   3
   2   2  17-20.9119 28.0213   4
  -2   2 -17-43.1812 57.9192   3
  -2  -2 -17-48.1140 41.5950   6
   2  -2  17 48.2435 49.1372   4
   2  -2  18 84.7698 34.3731   4
  -2   2 -18 118.640 54.1237   3
   2   2  18 143.477 61.1481   4
   2  -2  18 95.6333 57.1678   7
  -2  -2 -18 121.938 63.1490   3
  -2  -2 -18 106.203 46.6371   6
   2  -2  19 811.327 151.200   4
  -2  -2 -19 727.871 153.434   3
   2   2  19 824.610 145.092   4
  -2  -2 -19 822.287 134.668   6
  -2   2 -19 791.743 154.564   3
   2  -2  19 632.994 149.998   7
   2  -2  20 47.6182 50.1906   4
   2   2  20 69.5368 59.6875   4
  -2   2 -20-6.86528 52.5167   3
  -2  -2 -20 48.2430 62.6993   3
   2  -2  20 62.3711 35.5829   7
   2   2  21 444.301 115.335   4
   2   2  21 321.415 128.913   7
  -2  -2 -21 393.434 119.836   3
   2  -2  21 509.855 122.299   4
   2  -2  21 481.444 122.506   7
  -2   2 -21 329.130 110.227   3
  -2  -2 -22 2486.45 298.865   3
   2   2  22 1436.68 248.486   7
   2   2  22 2040.56 247.601   4
   2  -2  22 1928.10 254.042   7
  -2   2 -22 2562.79 304.045   3
   2  -2  22 1903.05 245.400   4
   2   2  23 531.289 160.015   7
   2  -2  23 498.370 134.537   7
   2  -2  23 520.467 129.533   4
   2   2  23 423.277 121.161   4
   2  -2  24-47.7910 52.6785   7
   2  -3 -24 322.572 111.540   3
  -2  -3  24 359.737 141.434   4
   2   3 -24 329.420 112.014   3
  -2   3  24 293.187 122.142   4
  -2  -3  23 9.40199 56.9562   4
   2  -3 -23 112.303 73.7127   3
  -2   3  23 48.5128 46.1603   4
   2   3 -23 79.1574 64.4109   3
   2  -3 -22 359.305 114.018   3
  -2   3  22 346.007 129.299   4
   2   3 -22 583.501 130.586   3
  -2  -3  22 730.790 176.587   4
   2   3 -21-4.62473 41.1757   3
  -2  -3  21 102.242 63.5679   4
   2  -3 -21 111.115 50.2565   3
  -2   3  21 60.1167 56.0982   4
  -2  -3  20 563.209 101.165   6
  -2   3  20 656.018 151.671   4
   2  -3 -20 638.912 135.910   3
   2  -3 -20 484.305 85.2210   8
   2   3 -20 479.911 117.431   3
  -2  -3  20 532.488 138.523   4
  -2  -3  19 1204.33 207.741   4
  -2  -3  19 1032.04 134.072   6
   2  -3 -19 896.832 110.771   8
   2   3 -19 1097.93 170.230   3
   2  -3 -19 1107.07 172.754   3
  -2   3  19 1186.26 208.534   4
  -2  -3  18 1837.23 173.658   6
   2  -3 -18 2519.78 250.607   3
   2   3 -18 1920.98 218.034   3
  -2   3  18 2442.89 280.616   4
  -2  -3  18 1897.13 249.423   4
   2  -3 -18 2034.26 160.843   8
   2  -3 -17 5030.50 247.745   8
  -2  -3  17 4978.94 280.506   6
  -2   3  17 5343.70 406.297   4
  -2  -3  17 5122.09 399.885   4
   2  -3 -17 5639.45 362.378   3
   2   3 -17 4615.31 320.999   3
   2  -3 -17 4528.53 163.040   5
  -2   3  16 1753.32 221.707   4
  -2  -3  16 1342.40 197.368   4
  -2  -3  16 1185.66 80.9197   5
   2   3 -16 1431.48 172.118   3
  -2  -3  16 1543.20 151.743   6
   2  -3 -16 1596.28 103.205   5
   2  -3 -16 1739.43 138.417   8
   2  -3 -16 1962.38 205.162   3
  -2  -3  15 5844.13 411.390   1
  -2  -3  15 6099.08 380.449   2
  -2  -3  15 5985.80 294.615   6
  -2  -3  15 5462.05 199.265   5
   2  -3 -15 5995.13 251.460   8
  -2   3  15 5917.03 397.628   4
  -2   3  15 6103.10 348.462   3
   2  -3 -15 6306.06 405.824   4
   2  -3 -15 6295.64 361.226   3
   2  -3 -15 5892.58 218.408   5
   2   3 -15 6009.55 342.778   3
   2  -3 -14 1000.73 137.427   3
   2  -3 -14 876.875 149.393   4
   2   3 -14 894.316 128.499   3
  -2  -3  14 962.383 84.8964   5
   2  -3 -14 1044.80 91.5381   5
   2   3 -14 914.496 158.656   1
  -2   3  14 1089.50 162.650   4
  -2  -3  14 839.320 148.454   1
  -2  -3  14 912.070 141.228   2
  -2   3  14 935.477 130.604   3
  -2  -3  14 930.662 111.123   6
   2  -3 -14 1075.89 99.5020   8
   2  -3 -13 118.861 33.5451   8
   2  -3 -13 157.142 48.9810   3
  -2  -3  13 52.6027 25.1569   5
   2   3 -13 100.716 60.1114   1
  -2   3  13 103.287 58.7270   4
  -2   3  13 145.322 51.2906   3
  -2  -3  13 28.7039 22.3178   2
  -2  -3  13 5.51365 36.5760   1
   2  -3 -13 94.6457 33.2796   5
   2   3 -13 48.0603 31.2889   3
   2  -3 -13 125.893 51.6000   4
   2  -3 -12 595.257 74.6605   5
   2   3 -12 390.836 94.6082   1
  -2  -3  12 281.768 77.0809   2
   2  -3 -12 571.726 64.8085   8
   2  -3 -12 613.823 100.602   3
  -2   3  12 537.006 92.0700   3
  -2   3  12 585.093 112.537   4
   2   3 -12 382.065 83.8683   2
  -2  -3  12 276.530 81.4654   1
   2   3 -12 347.928 73.1330   3
   2  -3 -12 637.039 118.358   4
   2  -3 -12 638.326 51.8906   6
   2  -3 -11 2593.99 197.690   3
   2  -3 -11 2549.86 130.204   8
   2   3 -11 2771.56 241.891   1
   2  -3 -11 2507.41 153.537   5
   2   3 -11 2625.61 201.893   2
  -2  -3  11 2604.42 207.977   2
  -2  -3  11 2406.45 225.623   1
   2  -3 -11 2693.87 105.353   6
  -2   3  11 2775.87 197.670   3
   2  -3 -11 2904.58 238.222   4
  -2   3  10 94.7036 36.3392   3
  -2  -3  10 35.8234 35.4139   2
   2  -3 -10 70.2470 28.5350   5
   2  -3 -10 25.9688 28.2539   4
   2  -3 -10 52.6289 14.9980   6
   2   3 -10 66.0821 44.0273   1
  -2  -3  10 78.7865 52.4070   1
   2  -3 -10 80.1115 24.6405   8
   2  -3  -9 1207.72 79.7225   8
   2  -3  -9 1185.50 64.0989   6
   2  -3  -9 1241.34 147.091   4
   2  -3  -9 1201.75 107.174   5
  -2   3   9 1220.22 120.179   3
  -2  -3   9 1279.86 131.749   2
   2   3  -9 1076.04 138.521   1
   2  -3  -8 117.562 42.8626   3
  -2   3   8 92.2554 35.6631   3
   2  -3  -8 42.7569 34.5384   4
   2   3  -8 135.684 41.6320   2
   2  -3  -8 118.323 24.8430   8
   2  -3  -8 119.650 40.7856   5
   2   3  -8 150.239 51.0505   1
  -2  -3   8 207.972 49.7144   2
   2  -3  -7 776.295 91.0938   3
  -2  -3   7 575.220 78.9430   2
   2  -3  -7 765.430 86.6208   5
   2   3  -7 497.006 70.5285   2
   2   3  -7 374.237 73.1148   1
  -2   3   7 852.840 92.5147   3
   2  -3  -7 838.366 58.6447   8
   2  -3  -7 846.793 111.917   4
  -2   3   6 2440.58 147.905   3
  -2   3   6 2452.42 105.544   8
   2  -3  -6 2631.24 158.120   3
   2  -3  -6 2400.41 179.631   4
   2   3  -6 1303.73 133.785   1
   2  -3  -5 15896.3 410.747   3
   2  -3  -5 16821.6 487.862   4
   2   3  -5 14931.1 454.266   1
  -2   3   5 15913.5 398.665   3
  -2   3   5 16140.6 323.478   8
   2   3  -5 15270.4 374.176   2
  -2  -3   5 14839.0 380.105   2
  -2   3   4 3.32931 13.2504   8
   2  -3  -4 9.67013 18.3140   3
  -2   3   4 13.2455 16.8716   3
   2   3  -4 6.93379 19.4343   1
   2  -3  -4 11.1097 20.9742   4
  -2  -3   4 7.77248 17.9196   2
   2   3  -4 11.9246 14.8982   2
  -2  -3   4-6.83667 16.9634   7
  -2  -3   4-0.42771 22.1528   1
   2   3  -3 3848.50 193.626   1
  -2  -3   3 4040.17 204.978   1
  -2  -3   3 3882.36 146.536   2
  -2   3   3 3605.46 167.812   3
   2   3  -3 3828.04 141.798   2
   2  -3  -3 3524.74 195.721   4
  -2  -3   3 3941.04 170.515   7
   2   3  -3 3806.19 205.982   8
  -2   3   3 3645.98 140.918   8
   2  -3  -2 3424.00 143.561   1
   2   3  -2 3529.75 122.612   2
  -2   3   2 3672.58 167.713   3
   2   3  -2 3439.87 174.352   1
   2   3  -2 3627.62 165.355   7
   2  -3  -2 3617.04 189.084   4
   2   3  -2 3773.00 194.564   8
  -2  -3   2 3426.08 122.896   2
  -2  -3   2 3314.31 178.847   1
  -2  -3   2 3532.99 159.443   7
  -2  -3   1 23822.9 523.039   1
   2   3  -1 23537.5 504.987   1
   2   3  -1 23453.1 531.552   8
  -2   3   1 22880.4 517.699   4
   2  -3  -1 22772.9 521.693   4
   2  -3  -1 22789.3 445.747   1
   2   3  -1 24650.7 497.228   7
  -2  -3   1 23028.9 475.766   7
   2   3  -1 23412.3 384.065   2
  -2   3   1 23474.0 436.806   1
   2   3   0 23830.9 503.877   1
   2   3   0 23498.6 394.492   2
   2  -3   0 26292.8 546.874   4
   2   3   0 24465.3 513.596   7
  -2   3   0 26664.4 471.059   1
   2   3   0 25049.8 536.322   8
  -2  -3   0 23213.2 516.093   1
   2  -3   0 26572.8 487.692   1
  -2   3   0 27061.0 543.370   4
   2   3   0 23404.5 482.830   3
  -2  -3   0 23337.4 495.289   7
   2  -3   1 20858.7 512.378   2
  -2  -3  -1 20377.8 462.814   1
  -2  -3  -1 20289.5 449.563   3
   2  -3   1 20911.7 474.855   4
  -2  -3  -1 21564.2 473.921   8
   2   3   1 20728.0 445.544   3
  -2  -3  -1 20553.6 456.663   7
   2   3   1 20425.9 464.539   8
   2  -3   1 20695.8 440.061   1
  -2   3  -1 20435.8 459.801   4
  -2   3  -1 20899.9 402.678   7
  -2  -3  -1 20628.6 449.926   4
   2   3   1 20593.3 468.874   7
  -2   3  -1 20291.9 421.975   1
   2  -3   2 21883.8 411.551   7
  -2  -3  -2 20386.9 461.926   3
   2  -3   2 21562.6 531.194   2
   2  -3   2 21318.6 467.706   1
  -2   3  -2 21548.4 457.397   1
  -2  -3  -2 20566.0 466.317   1
   2   3   2 21771.4 467.215   8
  -2  -3  -2 21171.0 458.891   4
   2   3   2 20897.6 461.517   3
   2   3   2 20163.1 488.320   7
  -2  -3  -2 21207.4 480.612   7
   2  -3   2 21623.6 477.170   4
  -2  -3  -2 20982.7 468.225   8
  -2   3  -2 21561.2 402.881   7
  -2  -3  -3 14701.7 367.686   8
   2  -3   3 13190.2 310.234   7
   2  -3   3 13685.6 382.263   1
   2   3   3 14807.6 355.356   8
  -2  -3  -3 14889.5 365.803   4
   2  -3   3 14206.8 425.621   2
   2   3   3 15815.8 423.245   7
  -2   3  -3 13484.4 303.614   7
   2  -3   3 13616.1 363.986   4
   2   3   3 14531.3 363.765   4
  -2  -3  -3 15033.0 389.955   3
   2   3   3 15021.6 380.668   3
  -2   3  -3 13712.3 371.910   1
   2  -3   4 136.115 42.4651   1
   2   3   4 303.655 48.4392   8
  -2   3  -4 152.509 41.2775   1
  -2  -3  -4 262.806 49.8079   3
  -2  -3  -4 205.187 41.0668   8
   2  -3   4 137.011 29.3096   7
   2   3   4 282.575 52.1399   3
   2  -3   4 154.023 45.7760   2
  -2   3  -4 162.020 32.4500   7
   2   3   4 275.398 46.5208   4
   2   3   4 191.262 46.7320   7
  -2  -3  -4 257.731 46.5545   4
   2   3   5 8990.49 316.618   3
   2  -3   5 11015.6 387.865   2
  -2  -3  -5 8690.15 318.488   3
  -2  -3  -5 8726.53 288.357   4
  -2   3  -5 10723.7 361.177   1
   2   3   5 9379.58 341.034   7
   2   3   5 8827.78 291.237   4
   2  -3   5 10923.0 283.920   7
  -2  -3  -5 8965.75 279.471   8
   2  -3   5 11200.0 370.973   1
  -2  -3  -6 7891.50 310.111   3
   2   3   6 7638.17 325.706   7
   2   3   6 8021.20 286.380   2
  -2   3  -6 7750.92 325.417   1
  -2  -3  -6 7535.90 252.407   8
   2  -3   6 7454.59 270.169   5
   2   3   6 7940.73 283.159   4
  -2  -3  -6 7372.92 272.195   4
   2  -3   6 7573.97 247.244   7
   2   3   6 8055.32 305.180   3
   2  -3   6 7651.87 337.098   2
   2  -3   6 7537.08 322.653   1
   2   3   7 7480.89 333.451   7
  -2  -3  -7 7520.05 315.590   3
   2  -3   7 7479.68 269.556   5
   2  -3   7 7651.63 349.571   2
   2  -3   7 7230.75 331.065   1
   2   3   7 7196.95 277.901   4
   2  -3   7 7426.91 260.691   7
   2   3   7 7482.56 295.009   2
  -2  -3  -7 7436.83 283.612   4
  -2  -3  -7 7262.57 250.193   8
  -2   3  -7 7702.36 343.450   1
   2   3   7 7316.41 305.110   3
  -2   3  -8 13910.7 496.391   1
  -2  -3  -8 13305.4 411.525   4
   2  -3   8 13635.9 494.364   2
   2  -3   8 13306.1 387.168   7
  -2  -3  -8 13164.0 360.776   8
   2   3   8 14039.3 439.194   2
   2   3   8 13355.1 447.499   3
   2  -3   8 13700.8 378.356   5
  -2  -3  -8 13637.4 455.442   3
   2   3   8 13201.2 406.616   4
  -2  -3  -9 3179.26 218.169   3
  -2  -3  -9 2992.93 193.433   4
   2  -3   9 2535.27 152.549   5
   2  -3   9 2710.07 200.896   6
   2  -3   9 2708.12 220.667   2
  -2  -3  -9 3196.17 208.603   6
  -2  -3  -9 3205.43 169.996   8
   2  -3   9 2483.84 164.077   7
   2   3   9 3145.37 194.573   4
  -2   3  -9 2414.64 212.512   1
   2   3   9 3207.96 216.231   3
   2   3   9 3105.57 208.768   2
  -2  -3 -10 47.1802 39.6132   3
   2   3  10 16.1523 27.5372   2
   2  -3  10 11.7555 23.5795   7
  -2  -3 -10 70.1903 30.5587   8
   2  -3  10 47.3291 24.3075   5
   2  -3  10 34.5023 23.8273   1
  -2   3 -10 66.6465 43.2730   1
   2   3  10 40.3032 24.1186   3
  -2  -3 -10 101.719 46.4061   4
   2  -3  10 41.8834 31.8891   2
   2  -3  10 87.7336 38.9318   6
   2   3  10 74.0286 35.9767   4
  -2  -3 -10 23.1222 25.5863   6
   2   3  11 1597.46 165.674   3
   2  -3  11 2186.22 190.299   6
  -2  -3 -11 1656.76 171.023   3
   2  -3  11 2055.61 133.161   5
   2  -3  11 2143.87 212.470   2
  -2  -3 -11 1533.00 150.679   6
  -2  -3 -11 1439.33 146.192   4
   2  -3  11 2023.00 167.968   7
   2   3  11 1731.30 172.152   2
  -2   3 -11 2023.68 199.689   2
  -2  -3 -11 1526.40 124.043   8
  -2   3 -11 2068.75 212.997   1
   2  -3  11 2219.23 217.475   1
  -2   3 -11 2068.58 190.886   3
   2   3  11 1573.83 148.848   4
   2  -3  12 589.967 97.4098   7
  -2  -3 -12 803.113 114.752   6
   2  -3  12 783.735 118.917   6
   2  -3  12 694.882 75.2095   5
  -2   3 -12 874.520 140.695   1
  -2  -3 -12 850.115 117.204   4
   2   3  12 926.002 131.912   2
  -2   3 -12 705.617 124.422   2
   2  -3  12 738.233 127.391   2
   2   3  12 789.233 124.279   3
  -2  -3 -12 983.881 140.187   3
  -2   3 -12 780.486 121.265   3
  -2  -3 -13 290.463 72.9072   6
  -2   3 -13 284.794 78.8079   2
  -2  -3 -13 348.068 84.3960   3
   2   3  13 362.033 87.1490   3
  -2  -3 -13 300.821 77.2525   4
  -2   3 -13 268.847 92.6843   1
   2  -3  13 277.210 44.4651   5
   2   3  13 307.247 84.7864   2
   2  -3  13 273.426 71.1563   7
  -2  -3 -13 318.624 50.3713   5
   2  -3  13 328.948 78.1466   6
  -2   3 -13 334.630 83.7736   3
   2  -3  13 361.257 99.0000   2
  -2   3 -14 464.889 108.521   2
   2   3  14 411.387 96.1720   2
  -2   3 -14 335.774 84.3448   3
   2   3  14 393.265 83.2450   4
  -2   3 -14 469.809 108.735   1
   2  -3  14 391.993 93.7059   7
  -2  -3 -14 518.085 94.6770   6
  -2  -3 -14 484.565 61.6819   5
  -2  -3 -14 455.353 101.340   3
   2  -3  14 349.294 48.2475   5
   2  -3  14 445.239 94.2271   6
  -2  -3 -15 75.0555 42.5080   6
   2  -3  15-5.50295 27.6058   7
  -2  -3 -15 4.36357 33.5025   3
  -2  -3 -15 21.1558 14.4986   5
  -2   3 -15-12.2335 36.8848   2
   2   3  15 20.7560 38.2751   4
  -2   3 -15 2.42887 34.1613   3
   2  -3  15 27.7986 12.1519   5
  -2   3 -16 2225.78 249.624   2
  -2  -3 -16 1893.49 97.0394   5
   2  -3  16 2419.46 236.088   4
  -2  -3 -16 2357.86 248.053   3
  -2  -3 -16 2687.19 224.564   6
  -2   3 -16 2396.40 245.513   3
   2  -3  16 2088.47 215.987   7
   2   3  16 2411.09 227.785   4
  -2  -3 -17 106.753 53.6124   3
   2  -3  17 155.604 73.8895   7
  -2  -3 -17 132.267 56.0526   6
  -2   3 -17 236.242 87.0527   3
   2   3  17 72.0010 40.2842   4
  -2   3 -17 227.472 92.9919   2
   2  -3  17 181.503 77.0821   4
  -2  -3 -18 1818.34 193.818   6
   2   3  18 1726.42 205.141   4
   2  -3  18 1621.03 204.642   4
  -2   3 -18 1733.79 223.150   3
  -2  -3 -18 2153.32 248.951   3
   2  -3  18 1934.01 211.220   7
  -2   3 -18 1621.07 216.400   2
  -2  -3 -19 122.361 63.7566   6
  -2  -3 -19 104.863 80.9701   3
  -2   3 -19 144.519 79.4340   3
   2  -3  19 63.6082 46.3215   4
  -2   3 -19 19.6015 48.8364   2
   2   3  19 67.1302 46.7754   4
   2  -3  19 61.1348 49.2571   7
   2  -3  20 3185.12 304.013   4
  -2   3 -20 3145.69 318.607   3
   2   3  20 2756.22 277.371   4
  -2  -3 -20 3002.55 260.775   6
   2  -3  20 2691.26 275.534   7
  -2  -3 -20 3406.55 336.165   3
   2   3  21 299.988 95.0275   4
  -2  -3 -21 529.957 112.449   6
   2  -3  21 389.218 113.824   7
   2  -3  21 675.497 144.675   4
  -2   3 -21 729.975 162.253   3
  -2  -3 -21 295.934 112.902   3
   2   3  21 373.428 128.330   7
   2   3  22-54.0240 56.1258   7
  -2  -3 -22-0.60789 59.0281   3
   2   3  22-22.7304 47.9081   4
   2  -3  22 24.6998 54.0094   4
  -2   3 -22 41.6057 45.7810   3
   2  -3  22 71.0573 37.6127   7
   2  -3  23 388.147 113.636   7
   2   3  23 260.048 95.2387   4
   2  -3  23 465.754 133.184   4
   2  -3  24 1015.04 187.581   7
  -2   4  24 426.637 153.425   4
  -2  -4  24 259.242 106.742   4
   2   4 -23 1633.16 233.440   3
  -2   4  23 1587.10 263.440   4
  -2  -4  23 1668.15 266.192   4
   2  -4 -23 1215.40 215.845   3
  -2   4  22 44.1891 58.0043   4
   2   4 -22 243.897 96.2924   3
  -2  -4  22 360.568 120.766   4
   2  -4 -22 126.388 77.8288   3
   2   4 -21 1639.81 219.012   3
  -2  -4  21 1571.38 247.527   4
  -2   4  21 1788.45 264.777   4
   2  -4 -21 1785.41 239.537   3
   2  -4 -20 675.803 141.185   3
   2   4 -20 540.495 128.238   3
  -2   4  20 652.373 155.803   4
  -2  -4  20 902.036 185.488   4
   2  -4 -19 3394.57 314.354   3
   2  -4 -19 2700.61 155.231   8
   2   4 -19 3094.55 284.880   3
  -2  -4  19 3421.64 255.568   6
  -2  -4  19 3335.57 351.142   4
  -2   4  19 3290.58 337.399   4
  -2  -4  18 226.808 63.1850   6
   2  -4 -18 131.889 36.7303   8
   2  -4 -18 220.441 82.7888   3
   2  -4 -18 97.5600 29.7312   5
  -2   4  18 141.354 80.7151   4
   2   4 -18 190.321 77.5067   3
  -2  -4  17 664.270 155.977   1
   2  -4 -17 511.085 112.044   3
   2   4 -17 305.913 82.6068   3
  -2   4  17 689.728 151.910   4
   2  -4 -17 509.603 66.3126   5
  -2  -4  17 425.919 90.2046   6
   2  -4 -17 473.090 59.6421   8
  -2  -4  17 302.110 46.2585   5
  -2   4  16 213.920 81.3948   4
   2  -4 -16 228.713 45.7596   5
   2  -4 -16 340.440 90.4441   3
  -2  -4  16 413.884 85.7008   6
   2   4 -16 302.425 78.9045   3
  -2  -4  16 339.814 52.2786   5
   2  -4 -16 216.171 40.6042   8
  -2  -4  16 580.661 144.103   1
  -2  -4  15 248.759 86.2948   1
   2   4 -15 209.551 68.9888   2
  -2   4  15 212.273 83.4045   4
   2  -4 -15 196.021 35.4169   6
   2  -4 -15 122.507 29.0746   8
   2   4 -15 241.421 70.7486   3
  -2  -4  15 180.679 42.3051   5
   2  -4 -15 132.200 60.9965   3
   2  -4 -15 188.522 42.2883   5
   2  -4 -14 1818.43 220.703   4
   2   4 -14 2276.51 220.201   2
  -2  -4  14 2409.80 260.577   1
   2  -4 -14 1921.25 197.078   3
  -2  -4  14 2373.84 233.054   2
  -2   4  14 1912.76 225.065   4
   2  -4 -14 1432.16 89.1094   8
  -2   4  14 1820.11 184.901   3
   2  -4 -14 1936.47 107.853   6
   2  -4 -14 1845.04 140.772   5
   2   4 -14 2251.83 205.433   3
   2   4 -13 1222.39 176.036   1
   2  -4 -13 1349.81 86.2236   6
   2  -4 -13 1122.02 72.6001   8
   2   4 -13 1270.98 158.236   2
  -2   4  13 1303.45 175.489   4
   2  -4 -13 1381.09 182.405   4
  -2  -4  13 1330.62 187.284   1
   2  -4 -13 1440.81 167.229   3
   2  -4 -13 1246.75 118.688   5
  -2   4  13 1471.33 161.108   3
  -2  -4  13 1233.91 160.455   2
   2  -4 -12 817.515 120.290   3
  -2  -4  12 675.423 130.401   1
   2  -4 -12 673.316 51.3322   8
  -2  -4  12 843.582 125.903   2
   2   4 -12 634.369 108.876   2
  -2   4  12 791.702 112.863   3
   2  -4 -12 850.390 98.4307   5
   2   4 -12 728.970 133.101   1
   2  -4 -12 844.937 138.388   4
  -2   4  12 776.206 135.261   4
   2  -4 -12 821.414 65.3595   6
  -2  -4  11 891.481 147.436   1
  -2   4  11 445.591 86.8831   3
   2   4 -11 967.517 146.173   1
   2   4 -11 869.166 120.101   2
   2  -4 -11 586.024 83.2139   5
   2  -4 -11 524.860 51.8961   6
   2  -4 -11 537.967 107.595   4
  -2  -4  11 845.094 120.730   2
   2  -4 -11 458.070 87.4851   3
   2  -4 -11 344.983 33.3228   8
  -2   4  11 523.806 105.627   4
  -2   4  10 6286.45 301.067   3
   2  -4 -10 6392.55 360.664   4
   2  -4 -10 6267.55 313.307   3
  -2  -4  10 5776.72 307.159   2
   2   4 -10 5843.94 352.041   1
  -2  -4  10 5344.77 337.738   1
  -2   4   9 23791.1 615.857   3
   2  -4  -9 23848.2 714.585   4
   2   4  -9 23065.3 713.293   1
  -2  -4   9 23040.8 631.236   2
   2   4  -8 7903.20 321.774   2
   2  -4  -8 8460.50 391.852   4
   2   4  -8 8042.41 385.911   1
  -2  -4   8 7799.50 327.258   2
  -2   4   8 8249.87 325.996   3
  -2   4   7 3610.64 203.944   3
   2  -4  -7 3675.43 246.604   4
   2  -4  -7 3606.25 210.925   3
  -2   4   7 3328.28 112.731   8
   2   4  -7 3657.96 245.057   1
  -2  -4   7 3577.73 205.209   2
   2   4  -7 3647.40 200.299   2
  -2   4   6 9137.25 325.142   3
  -2  -4   6 7753.86 293.507   2
   2  -4  -6 9294.91 386.068   4
   2   4  -6 7735.60 349.828   1
  -2   4   6 8731.16 205.778   8
   2   4  -6 7616.56 284.564   2
   2  -4  -6 8853.60 330.418   3
  -2  -4   6 7824.32 273.836   7
  -2  -4   5 20530.0 488.162   2
  -2   4   5 21478.0 388.607   8
   2   4  -5 19782.5 473.790   2
   2  -4  -5 21931.2 540.961   3
   2  -4  -5 22056.0 608.236   4
  -2   4   5 21897.3 525.325   3
   2   4  -5 20223.1 574.446   1
  -2  -4   5 20621.2 465.826   7
  -2  -4   4 9243.98 285.648   2
   2  -4  -4 8918.74 359.724   4
  -2   4   4 8596.10 309.240   3
   2   4  -4 9655.18 357.128   1
   2   4  -4 9332.93 283.358   2
  -2  -4   4 9563.29 281.488   7
   2   4  -3 916.734 78.6733   2
   2   4  -3 795.040 94.1188   1
  -2   4   3 1123.18 104.748   3
   2  -4  -3 1075.67 92.5880   1
   2  -4  -3 1138.48 122.025   4
   2   4  -3 934.130 85.6103   7
  -2  -4   3 901.714 77.6781   2
  -2  -4   3 925.016 80.7481   7
   2  -4  -2 10981.2 325.842   1
  -2   4   2 11463.1 361.876   3
  -2  -4   2 13197.8 313.771   2
   2   4  -2 13169.7 412.348   8
   2   4  -2 13373.6 347.335   7
  -2  -4   2 13362.7 335.281   7
   2  -4  -2 12069.6 401.795   4
   2   4  -2 13158.2 398.285   1
   2   4  -2 13115.8 308.622   2
   2   4  -1 4520.32 216.879   1
  -2  -4   1 4407.00 183.513   7
  -2   4   1 4085.76 177.528   1
   2   4  -1 4310.93 159.338   2
   2  -4  -1 4023.56 185.265   1
   2  -4  -1 4344.86 225.517   4
  -2   4   1 3976.74 213.226   4
   2   4  -1 4355.31 218.607   8
   2   4  -1 4649.57 194.749   7
   2   4   0 1754.80 130.270   8
   2  -4   0 1257.21 103.636   1
  -2  -4   0 1635.75 113.289   7
   2   4   0 1698.56 95.9316   2
   2  -4   0 1454.21 127.646   4
   2   4   0 1679.36 126.775   1
   2   4   0 1645.75 117.058   7
  -2   4   0 1309.67 101.094   1
  -2   4   0 1221.89 114.361   4
   2   4   0 1611.04 120.877   3
   2   4   1 12768.8 371.407   1
   2   4   1 12305.6 355.109   7
  -2   4  -1 12276.0 377.410   4
   2   4   1 12528.6 365.038   3
   2   4   1 12319.5 361.360   8
  -2   4  -1 12240.3 286.082   7
  -2   4  -1 12282.6 345.335   1
  -2  -4  -1 11953.4 368.415   4
   2  -4   1 12274.1 360.063   1
  -2  -4  -1 11922.8 342.770   7
   2  -4   1 12654.7 392.056   4
   2  -4   2 14121.9 408.297   1
   2   4   2 15335.4 415.147   7
  -2  -4  -2 14790.7 417.740   1
  -2   4  -2 14694.0 398.003   1
  -2  -4  -2 15146.7 416.886   4
   2  -4   2 14137.6 417.158   4
   2  -4   2 14808.5 459.984   2
   2   4   2 14976.0 391.359   8
  -2   4  -2 14446.2 303.348   7
   2   4   2 15318.3 411.262   3
  -2  -4  -2 14956.4 394.911   8
  -2  -4  -2 14378.7 414.623   3
  -2   4  -3 1131.82 68.9220   7
   2  -4   3 1088.63 107.564   4
   2   4   3 988.357 90.5491   8
  -2  -4  -3 993.641 92.2087   8
  -2   4  -3 1105.28 106.655   1
   2  -4   3 1159.17 122.377   2
  -2  -4  -3 1000.82 103.380   3
   2   4   3 949.835 98.4337   4
  -2  -4  -3 979.677 100.163   4
   2  -4   3 1100.56 111.426   1
  -2  -4  -3 1037.67 102.761   1
   2   4   3 1019.16 100.195   3
   2   4   3 923.121 101.877   7
   2   4   4 6046.84 262.829   3
  -2  -4  -4 6409.77 276.553   3
  -2  -4  -4 6019.13 232.510   8
  -2   4  -4 8526.32 318.747   1
   2  -4   4 8309.17 344.562   2
   2  -4   4 8281.54 214.587   7
  -2  -4  -4 6184.22 261.555   4
   2   4   4 6290.75 262.928   4
   2  -4   4 8098.71 303.163   4
   2  -4   4 8563.43 329.622   1
   2   4   4 6085.46 223.897   8
   2   4   4 5827.04 274.401   7
  -2  -4  -5 11186.4 320.602   8
  -2  -4  -5 11098.0 363.540   4
   2   4   5 10854.7 361.570   4
   2  -4   5 11522.5 427.135   2
  -2   4  -5 11693.6 401.672   1
   2   4   5 11124.5 301.139   8
   2   4   5 11017.1 373.335   3
   2  -4   5 11646.8 408.459   1
   2  -4   5 11014.0 275.461   7
   2   4   5 10930.4 394.749   7
  -2  -4  -5 11205.8 389.336   3
   2   4   6 2700.13 183.362   3
   2  -4   6 3461.98 150.298   7
   2  -4   6 3544.59 237.427   2
  -2  -4  -6 2777.82 190.693   3
  -2   4  -6 3629.62 228.143   1
   2  -4   6 3743.58 234.073   1
   2   4   6 2628.22 176.342   4
   2   4   6 2592.06 189.272   7
  -2  -4  -6 2507.25 144.081   8
  -2  -4  -6 2656.74 174.881   4
   2  -4   7 1253.65 95.0857   7
   2   4   7 1147.48 132.344   7
  -2   4  -7 1336.82 143.960   1
   2  -4   7 1291.09 149.256   2
   2   4   7 999.071 113.779   3
  -2  -4  -7 1043.84 122.536   3
   2   4   7 1049.07 112.922   4
  -2  -4  -7 1014.15 112.600   4
  -2  -4  -7 1091.72 93.6081   8
  -2  -4  -8 14926.7 501.220   3
   2   4   8 15115.5 490.607   3
   2  -4   8 15687.5 398.037   7
  -2  -4  -8 14502.0 380.529   8
   2   4   8 14723.5 465.149   4
   2   4   8 14749.0 519.147   7
  -2   4  -8 15378.5 539.230   1
   2  -4   8 15658.9 556.055   2
  -2  -4  -8 14238.6 460.075   4
   2  -4   9 431.065 80.7415   6
   2   4   9 307.641 67.5181   4
   2  -4   9 424.448 91.6977   1
   2   4   9 321.813 68.0777   2
  -2  -4  -9 308.075 64.8023   4
  -2   4  -9 441.511 90.7644   1
   2  -4   9 459.499 96.6144   2
  -2  -4  -9 328.262 54.2320   8
   2  -4   9 457.828 66.9758   7
   2   4   9 276.983 70.9635   3
  -2  -4  -9 303.016 72.3042   3
   2  -4   9 493.589 76.9536   5
   2  -4  10 4422.13 273.510   6
  -2   4 -10 4226.49 301.179   1
   2  -4  10 4365.29 305.913   2
   2   4  10 4656.29 278.540   2
  -2  -4 -10 4551.21 265.914   4
  -2  -4 -10 4537.73 203.098   8
  -2  -4 -10 4689.25 290.623   3
   2  -4  10 4273.96 301.063   1
   2  -4  10 4193.65 218.542   7
  -2   4 -10 4486.82 298.893   2
   2   4  10 4624.12 281.679   3
   2  -4  10 4204.99 215.251   5
   2   4  11 442.981 91.1639   3
   2  -4  11 399.396 71.6198   7
   2  -4  11 314.964 72.4617   6
   2  -4  11 397.105 67.9490   5
  -2  -4 -11 386.692 87.4826   3
   2  -4  11 303.479 85.7129   2
   2  -4  11 380.306 96.7576   1
  -2  -4 -11 387.566 60.1700   8
   2   4  11 484.508 95.6809   2
  -2  -4 -11 308.552 74.7882   4
  -2  -4 -11 379.131 81.9744   6
  -2   4 -11 444.818 104.163   1
  -2   4 -11 405.390 96.7149   2
  -2  -4 -12 879.780 121.780   6
  -2   4 -12 794.035 138.944   1
   2  -4  12 813.885 92.3788   5
  -2  -4 -12 837.062 131.896   3
   2  -4  12 800.060 140.187   2
  -2  -4 -12 966.155 130.932   4
   2  -4  12 664.780 105.412   7
   2   4  12 927.245 130.814   2
   2  -4  12 862.738 146.038   1
   2  -4  12 736.212 118.487   6
   2   4  12 827.659 125.744   3
  -2  -4 -12 727.893 83.6878   8
  -2   4 -12 704.154 124.055   2
   2  -4  13 201.136 67.5982   6
  -2  -4 -13 258.006 54.0763   8
  -2  -4 -13 317.571 88.9334   3
   2   4  13 303.695 73.8137   4
  -2   4 -13 355.097 98.7308   1
  -2  -4 -13 338.066 82.6685   4
   2  -4  13 277.903 66.5110   7
  -2   4 -13 296.498 80.7192   3
   2  -4  13 303.352 57.9169   5
  -2  -4 -13 344.441 78.1147   6
  -2   4 -13 215.043 69.4871   2
   2   4  13 362.104 87.8505   2
   2  -4  13 226.049 82.1871   1
  -2  -4 -14 1794.27 179.706   6
   2   4  14 1842.04 189.392   4
   2  -4  14 1390.82 114.308   5
  -2  -4 -14 1904.10 211.956   3
  -2   4 -14 1412.45 181.557   3
   2  -4  14 1535.87 157.016   7
  -2   4 -14 1496.11 194.859   2
  -2  -4 -14 1691.55 135.276   8
  -2  -4 -14 1780.38 191.270   4
   2   4  14 1755.04 197.058   2
  -2  -4 -15 320.996 58.4443   5
  -2   4 -15 497.351 123.687   2
   2  -4  15 499.669 99.7023   7
  -2   4 -15 410.698 103.807   3
   2  -4  15 433.196 60.0128   5
   2   4  15 305.107 81.2677   4
  -2  -4 -15 314.365 77.7450   6
  -2  -4 -15 421.438 100.037   4
  -2  -4 -15 220.464 49.9148   8
  -2  -4 -15 322.543 95.0181   3
  -2  -4 -16 925.791 134.357   6
  -2   4 -16 783.864 143.859   3
  -2   4 -16 694.322 142.527   2
   2  -4  16 557.186 110.037   7
  -2  -4 -16 972.772 92.3340   5
   2   4  16 1066.09 156.672   4
  -2  -4 -16 925.355 105.592   8
   2  -4  16 574.031 63.2664   5
  -2  -4 -16 1130.45 174.027   3
  -2  -4 -17 55.4919 27.2529   5
   2  -4  17 16.7637 12.4782   5
  -2  -4 -17-35.0067 43.7027   3
  -2   4 -17 69.9361 50.9269   2
  -2   4 -17-23.3049 47.3861   3
   2   4  17 146.215 64.1332   4
  -2  -4 -17 138.438 57.6677   6
   2  -4  17 73.3761 51.1505   7
   2  -4  18 149.340 79.6757   4
  -2  -4 -18 185.398 83.6187   3
  -2   4 -18 146.699 80.5275   2
   2   4  18 152.324 58.5877   4
  -2   4 -18 94.9867 57.4715   3
  -2  -4 -18 218.955 73.6973   6
   2  -4  18 98.1073 54.9393   7
  -2  -4 -19 533.743 136.431   3
  -2  -4 -19 666.844 121.951   6
  -2   4 -19 582.237 142.418   2
   2   4  19 572.360 124.027   4
   2  -4  19 531.997 123.550   4
  -2   4 -19 476.520 124.839   3
   2  -4  19 500.206 109.507   7
  -2   4 -20 334.500 108.689   2
   2  -4  20 528.985 126.134   4
   2  -4  20 471.440 116.604   7
   2   4  20 384.097 113.967   4
  -2  -4 -20 311.897 86.7343   6
  -2   4 -20 383.784 120.410   3
  -2  -4 -20 393.811 123.780   3
   2   4  21 125.785 95.2546   7
   2   4  21 74.7402 63.9873   4
  -2  -4 -21-23.7539 53.0040   3
   2  -4  21-64.2185 53.1611   4
  -2   4 -21 40.3378 51.6120   2
  -2   4 -21 48.5744 59.0721   3
  -2  -4 -21 22.8633 30.3320   6
   2  -4  21 69.6026 56.0432   7
   2  -4  22 311.911 97.8934   7
   2  -4  22 469.763 131.175   4
  -2  -4 -22 419.987 97.5829   6
   2   4  22 433.087 125.318   4
   2  -4  23 607.042 149.725   4
   2  -4  23 392.958 140.123   7
   2  -4  24 19.0319 43.6425   7
  -2   5  23 10.9795 73.1957   4
  -2  -5  23 10.3341 57.7096   4
   2   5 -23-42.6846 71.8640   3
   2  -5 -23 80.1417 56.0111   3
   2  -5 -22 56.6201 61.4856   3
  -2   5  22-33.0126 71.4991   4
   2   5 -22 41.3587 58.9940   3
  -2  -5  22 81.8345 68.6527   4
  -2   5  21 1109.88 209.601   4
   2  -5 -21 879.258 168.623   3
   2   5 -21 822.428 159.791   3
  -2  -5  21 779.138 182.850   4
   2   5 -20 16.4992 37.7645   3
   2  -5 -20 27.5228 48.2268   3
  -2  -5  20 128.532 89.1437   4
  -2   5  20 62.8863 65.8311   4
   2   5 -19 64.0852 48.3556   3
   2  -5 -19 134.060 69.4332   3
  -2   5  19 37.8714 41.3695   4
  -2  -5  19 111.593 70.3225   1
  -2  -5  18 1190.42 214.354   1
  -2   5  18 1019.95 187.848   4
   2  -5 -18 763.480 89.9748   5
   2   5 -18 1259.08 177.171   3
   2  -5 -18 989.761 166.354   3
   2   5 -17 314.259 97.0340   2
  -2  -5  17 156.310 43.8997   6
   2  -5 -17 116.539 36.5211   5
  -2  -5  17 157.278 74.3022   1
   2  -5 -17 118.004 65.7945   3
  -2  -5  17 154.955 40.8336   5
   2   5 -17 219.689 77.0035   3
   2  -5 -17 114.070 31.7882   6
  -2   5  17 110.147 77.7338   4
  -2   5  16 935.088 168.825   4
   2   5 -16 889.758 137.062   3
   2  -5 -16 884.416 79.8850   6
  -2  -5  16 1162.48 199.224   1
   2  -5 -16 856.570 148.348   3
   2   5 -16 805.485 145.954   2
   2  -5 -16 879.780 106.036   5
  -2   5  15-14.5567 39.6844   4
  -2  -5  15 32.8706 45.3645   1
   2  -5 -15-59.0806 60.0015   3
   2  -5 -15 50.5341 26.6498   5
   2   5 -15-4.66084 39.9707   2
   2  -5 -15-7.70603 12.8471   6
   2  -5 -14 3.54238 21.3712   5
  -2   5  14 8.58095 46.8595   4
  -2  -5  14 9.58556 30.3936   2
   2  -5 -14 33.8038 17.8706   6
   2  -5 -14 58.9431 34.3451   3
  -2  -5  14-12.1757 52.6864   1
   2   5 -14 46.0546 32.6735   2
   2  -5 -13 385.717 51.9311   6
   2   5 -13 209.401 69.6818   2
  -2   5  13 355.036 94.9829   4
  -2   5  13 426.614 90.0056   3
  -2  -5  13 233.019 74.6284   2
  -2  -5  13 181.245 80.0349   1
   2  -5 -13 418.772 76.7768   5
   2  -5 -13 381.546 99.4954   4
   2  -5 -13 403.825 93.5468   3
  -2   5  12 142.391 55.6444   3
   2   5 -12 396.191 89.9740   2
  -2  -5  12 212.502 77.8724   1
  -2  -5  12 163.528 61.3604   2
   2  -5 -12 75.8540 51.2351   4
   2  -5 -12 97.9079 25.8703   6
   2   5 -12 282.994 84.8481   1
  -2   5  12 74.1276 46.8565   4
   2  -5 -12 86.0745 45.4407   3
  -2  -5  11 362.001 82.2636   2
  -2  -5  11 297.911 84.5889   1
   2  -5 -11 348.367 90.6066   4
   2  -5 -11 436.676 89.3560   3
  -2   5  11 387.565 86.4515   3
   2   5 -11 463.254 112.483   1
   2   5 -11 496.964 95.5718   2
  -2   5  11 396.860 92.0659   4
  -2   5  10 683.397 105.517   3
   2  -5 -10 610.090 102.893   3
   2   5 -10 325.272 70.2513   2
   2  -5 -10 568.605 112.098   4
   2   5 -10 342.669 87.8368   1
  -2   5  10 681.741 121.454   4
  -2  -5  10 355.386 80.9620   2
  -2  -5  10 366.059 92.7320   1
   2   5  -9 1828.94 194.697   1
   2  -5  -9 2151.90 214.260   4
  -2  -5   9 1782.71 167.005   2
  -2  -5   9 1874.94 200.911   1
  -2   5   9 2194.12 180.479   3
   2  -5  -9 2182.55 186.490   3
  -2   5   8 4979.52 267.106   3
   2   5  -8 5312.68 323.092   1
   2  -5  -8 4839.20 309.115   4
  -2  -5   8 5618.53 286.272   2
   2  -5  -8 5115.29 284.584   3
   2  -5  -7 8731.16 408.806   4
   2   5  -7 8183.74 391.036   1
  -2  -5   7 8261.33 335.752   2
   2   5  -7 7831.42 319.854   2
  -2   5   7 9357.00 361.589   3
  -2  -5   7 8143.08 281.402   7
  -2   5   7 7678.92 174.588   8
  -2   5   6 1045.24 67.5364   8
  -2   5   6 1302.63 129.113   3
  -2  -5   6 1668.54 139.767   2
   2   5  -6 1653.32 166.619   1
   2  -5  -6 1156.92 143.720   4
  -2  -5   6 1621.37 114.391   7
   2   5  -6 1783.93 138.620   2
   2   5  -5 5203.08 235.097   2
   2  -5  -5 4758.19 286.084   4
   2  -5  -5 4682.81 231.123   1
   2   5  -5 5103.93 284.250   1
  -2   5   5 4437.12 155.509   8
  -2  -5   5 5259.46 239.005   2
  -2   5   5 4800.69 249.130   3
  -2  -5   5 5252.26 202.840   7
   2  -5  -4 6675.00 274.709   1
  -2  -5   4 8247.81 289.948   2
  -2   5   4 6970.49 301.158   3
   2   5  -4 8136.37 282.406   2
   2   5  -4 7927.87 347.327   1
  -2  -5   4 8116.76 253.991   7
   2  -5  -4 6650.71 332.398   4
   2   5  -3 194.728 39.3107   7
  -2  -5   3 184.856 35.5985   7
   2  -5  -3 170.466 44.0611   1
  -2  -5   3 155.077 38.0546   2
   2   5  -3 160.198 39.8813   2
   2  -5  -3 232.541 62.3053   4
   2   5  -3 118.578 41.6267   1
  -2   5   3 287.008 59.5553   3
   2   5  -2 21726.4 578.480   1
  -2   5   2 23714.6 591.415   3
   2  -5  -2 24079.3 635.140   4
  -2  -5   2 21218.1 463.599   7
   2   5  -2 20864.7 577.185   8
   2  -5  -2 22743.8 542.457   1
   2   5  -2 21523.2 480.220   2
   2   5  -2 21516.2 485.441   7
   2   5  -1 23881.0 521.132   7
  -2   5   1 22873.6 613.238   4
   2   5  -1 23936.5 599.212   1
  -2  -5   1 24012.6 502.041   7
   2   5  -1 24364.2 590.633   3
   2  -5  -1 22965.7 561.353   1
   2   5  -1 22908.7 494.420   2
   2   5  -1 24107.8 606.673   8
   2  -5  -1 23807.0 631.696   4
  -2   5   1 23666.0 541.816   1
   2   5   0 6109.00 273.421   8
  -2   5   0 6644.21 263.218   1
   2   5   0 6542.98 250.422   7
  -2  -5   0 6220.20 236.003   7
   2  -5   0 6808.10 282.697   1
  -2  -5   0 6392.65 288.622   4
   2   5   0 6548.25 281.022   3
   2  -5   0 6801.60 311.370   4
   2   5   0 6425.59 229.583   2
  -2   5   0 6604.82 298.554   4
   2   5   0 6651.61 286.540   1
   2   5   1 276.375 53.9812   7
  -2   5  -1 235.361 50.2668   1
   2  -5   1 183.907 52.3911   4
  -2   5  -1 152.670 27.9867   7
   2   5   1 235.418 50.6402   3
  -2  -5  -1 185.990 49.9455   4
   2  -5   1 101.476 36.0989   1
   2   5   1 249.793 53.5910   8
   2   5   1 189.772 47.5671   1
   2  -5   2 308.994 65.2313   4
   2   5   2 307.674 56.1304   8
   2  -5   2 255.350 56.9747   1
  -2  -5  -2 339.714 68.9159   4
   2  -5   2 281.731 65.7277   2
   2   5   2 360.987 68.4708   3
  -2   5  -2 316.521 65.0334   1
  -2   5  -2 310.472 36.1420   7
   2   5   2 341.718 62.7196   7
   2  -5   3 1937.12 174.201   2
   2   5   3 1928.31 151.787   7
   2   5   3 1966.04 134.992   8
  -2   5  -3 1655.81 77.7749   7
  -2  -5  -3 1783.48 151.438   3
  -2  -5  -3 1782.61 151.575   4
  -2   5  -3 1687.39 142.690   1
   2  -5   3 1761.56 154.156   1
   2  -5   3 1823.34 153.670   4
   2   5   3 1839.25 151.817   3
   2  -5   4 16830.5 543.958   2
   2  -5   4 16777.5 516.476   1
   2   5   4 15469.0 400.973   8
   2   5   4 16391.2 490.191   7
   2  -5   4 16516.3 500.721   4
   2   5   4 15564.2 473.183   3
  -2  -5  -4 15283.3 475.580   4
  -2   5  -4 16063.8 488.940   1
   2   5   4 15384.0 471.848   4
  -2  -5  -4 14834.1 478.813   3
   2   5   5 683.850 72.8611   8
   2   5   5 774.445 103.781   7
  -2   5  -5 494.229 88.5250   1
  -2  -5  -5 668.408 73.7970   8
  -2  -5  -5 667.156 96.7866   3
   2   5   5 778.583 100.095   3
   2  -5   5 485.585 89.8058   2
  -2  -5  -5 683.635 97.5727   1
  -2  -5  -5 736.607 99.6704   4
   2  -5   5 371.715 41.1552   7
   2   5   5 777.380 102.198   4
   2  -5   5 532.448 87.9324   4
  -2  -5  -6 5085.85 282.850   3
   2  -5   6 5636.42 317.905   2
  -2  -5  -6 5216.22 211.940   8
   2  -5   6 5464.50 175.920   7
  -2   5  -6 5575.03 300.141   1
  -2  -5  -6 5175.33 270.782   4
   2   5   6 5450.79 289.811   7
   2   5   6 5250.83 270.338   4
   2   5   6 5290.09 275.306   3
   2   5   7 6375.84 312.747   3
   2   5   7 6479.19 326.845   7
   2  -5   7 7062.29 216.760   7
  -2  -5  -7 6595.59 332.032   3
  -2  -5  -7 6121.27 306.243   4
  -2  -5  -7 6659.07 237.495   8
   2  -5   7 6944.03 363.043   2
  -2   5  -7 7016.27 354.645   1
  -2   5  -8 6185.01 350.018   1
   2  -5   8 6664.80 365.579   1
  -2  -5  -8 6407.90 232.792   8
   2  -5   8 6269.66 357.964   2
   2  -5   8 6286.19 328.339   6
   2   5   8 6267.43 319.309   3
  -2  -5  -8 6828.88 346.973   3
  -2  -5  -8 6367.15 318.253   4
   2  -5   8 6380.64 223.121   7
   2   5   8 6311.75 338.127   7
  -2  -5  -9 8850.60 408.226   3
   2  -5   9 9106.05 408.175   6
   2  -5   9 9103.64 445.176   1
   2   5   9 9001.89 421.698   7
   2   5   9 9138.70 402.961   3
  -2  -5  -9 8892.38 390.507   4
   2  -5   9 8638.50 433.984   2
  -2  -5  -9 8799.09 278.887   8
  -2   5  -9 9383.49 447.311   2
   2  -5   9 8756.42 285.395   7
  -2   5  -9 9350.07 445.885   1
   2  -5  10 27.4821 30.5785   1
  -2  -5 -10 15.0555 28.5602   4
  -2  -5 -10-6.42709 29.4198   3
   2  -5  10 67.7944 25.5963   7
   2  -5  10 43.0072 53.3312   6
   2  -5  10 37.6640 51.1929   2
   2   5  10 30.1569 31.0627   3
  -2  -5 -10 11.5460 13.2445   8
  -2   5 -10 66.0457 41.5828   1
  -2   5 -10 87.4523 48.5656   2
  -2   5 -11 152.977 59.7866   1
   2   5  11 102.722 43.8360   2
  -2  -5 -11 194.845 66.2625   3
   2  -5  11 146.558 59.8300   1
   2  -5  11 158.162 46.0113   7
   2  -5  11 164.587 52.4995   5
   2  -5  11 138.620 58.3815   2
  -2  -5 -11 96.1563 44.7916   4
   2  -5  11 110.746 47.9810   6
   2   5  11 132.739 54.6797   4
  -2  -5 -11 76.7873 24.6356   8
   2   5  11 136.792 52.1111   3
  -2   5 -11 169.201 59.8147   2
  -2   5 -12 359.588 97.9483   1
  -2  -5 -12 566.368 102.639   6
   2  -5  12 377.029 86.4399   6
   2  -5  12 404.795 103.306   1
   2  -5  12 320.928 67.0869   5
  -2   5 -12 364.482 93.7080   2
   2   5  12 534.085 105.201   2
  -2  -5 -12 439.440 59.8999   8
   2   5  12 497.944 96.8373   4
   2  -5  12 301.743 63.9650   7
  -2  -5 -12 416.192 103.760   3
  -2  -5 -12 522.240 103.253   4
  -2   5 -13 835.197 142.336   2
   2   5  13 1251.88 161.499   4
  -2  -5 -13 1333.20 156.581   6
   2  -5  13 821.044 101.650   5
  -2  -5 -13 1376.02 181.076   3
  -2  -5 -13 1186.46 102.522   8
   2  -5  13 749.626 106.001   7
   2  -5  13 842.372 159.296   1
  -2  -5 -13 1192.44 157.583   4
   2   5  13 1201.25 159.171   2
   2  -5  14 3313.62 314.746   1
   2  -5  14 2658.63 218.308   7
  -2  -5 -14 3190.22 247.064   6
   2   5  14 3258.55 264.179   4
  -2  -5 -14 3102.18 171.402   8
   2  -5  14 3229.47 199.374   5
  -2  -5 -14 3362.49 273.435   4
  -2   5 -14 3518.31 307.007   2
  -2  -5 -14 3475.20 296.068   3
  -2   5 -15 5989.95 395.565   3
   2  -5  15 5651.10 308.252   7
  -2   5 -15 6196.45 420.607   2
  -2  -5 -15 5043.31 370.464   3
  -2  -5 -15 5082.40 319.252   6
  -2  -5 -15 5192.03 352.094   4
   2   5  15 4960.24 336.922   4
  -2  -5 -15 4514.61 216.075   8
   2  -5  15 5552.81 256.597   5
   2  -5  15 5974.19 441.999   1
   2  -5  16 1648.34 130.855   5
  -2  -5 -16 1699.44 186.250   6
  -2   5 -16 1805.52 222.890   3
   2  -5  16 1574.90 176.167   7
  -2  -5 -16 1489.95 195.384   4
  -2   5 -16 1917.85 239.719   2
  -2  -5 -16 1612.04 216.907   3
   2   5  16 1474.85 187.270   4
  -2  -5 -16 1403.90 119.555   8
   2  -5  17 1553.50 177.259   7
   2   5  17 1551.64 197.484   4
  -2   5 -17 2043.39 258.866   2
  -2  -5 -17 1647.79 186.582   6
   2  -5  17 1621.77 120.866   5
  -2   5 -17 1908.75 238.461   3
  -2  -5 -17 1571.92 217.825   3
  -2  -5 -18 274.460 100.561   3
  -2  -5 -18 330.009 91.6372   6
   2  -5  18 438.484 95.4630   7
  -2   5 -18 525.451 139.961   2
   2   5  18 253.439 86.8540   4
  -2   5 -18 645.497 147.403   3
  -2  -5 -19 96.4241 48.1885   6
  -2   5 -19 68.7558 51.5434   2
  -2  -5 -19 110.466 65.2752   3
   2  -5  19 113.690 65.9772   7
  -2   5 -19 30.3108 35.1624   3
   2   5  19 6.31231 31.5398   4
   2   5  20 38.0125 54.1395   7
  -2  -5 -20 47.7194 64.7928   3
   2  -5  20 76.5243 56.7280   4
  -2   5 -20 152.426 70.3902   3
  -2   5 -20 72.0399 70.0537   2
   2   5  20 185.373 80.3514   4
  -2  -5 -20 215.735 75.9185   6
   2  -5  20 114.133 57.7388   7
  -2  -5 -21 156.712 100.961   3
   2   5  21 104.270 78.9752   7
  -2   5 -21 91.8836 68.5520   3
   2  -5  21 77.2312 65.5373   4
  -2  -5 -21 123.852 55.9863   6
  -2   5 -21 82.2255 71.0411   2
   2   5  21 104.601 63.8004   4
   2  -5  21 12.0419 41.4313   7
   2   5  22 334.485 106.311   4
   2  -5  22 158.530 76.0599   4
   2  -5  22 313.690 98.9205   7
   2  -5  23 425.643 130.688   4
  -2   6  23 3753.46 410.756   4
  -2  -6  22 149.378 101.992   4
   2   6 -22 170.462 81.7697   3
   2  -6 -22 197.649 91.3897   3
  -2   6  22 229.749 110.181   4
   2   6 -21 29.5540 42.8500   3
   2  -6 -21 71.7227 59.7498   3
  -2   6  21 51.2003 57.7524   4
  -2  -6  20 55.5278 67.3931   1
  -2   6  20 23.5704 50.6151   4
   2  -6 -20-6.57701 36.0999   3
   2   6 -20-40.7129 37.6118   3
   2   6 -19 257.758 97.7206   2
  -2  -6  19 259.553 116.962   1
   2   6 -19 178.350 80.1813   3
   2  -6 -19 448.100 119.279   3
  -2   6  19 308.981 117.379   4
  -2  -6  18 1469.18 242.102   1
   2  -6 -18 1237.40 196.502   3
  -2   6  18 1326.81 213.864   4
   2  -6 -18 1346.50 136.020   5
   2   6 -18 1379.23 207.213   2
   2   6 -18 1507.49 202.042   3
  -2  -6  17 517.055 140.491   1
   2   6 -17 741.082 135.381   3
   2  -6 -17 511.234 91.3615   5
  -2   6  17 595.498 145.109   4
   2  -6 -17 503.808 118.651   3
   2  -6 -17 561.034 68.6287   6
   2   6 -17 719.713 147.112   2
  -2  -6  16 1679.70 243.255   1
  -2   6  16 1433.09 216.466   4
   2  -6 -16 1400.20 108.355   6
   2   6 -16 1749.08 213.715   2
   2  -6 -16 1349.81 143.350   5
   2  -6 -16 1307.29 188.256   3
   2   6 -15 83.1812 54.3459   2
  -2  -6  15 139.934 79.4621   1
   2  -6 -15 105.056 29.6207   6
   2  -6 -15 125.390 62.1282   3
  -2   6  15 63.5458 66.3234   4
   2  -6 -15 133.039 48.8890   5
   2   6 -14 96.1776 55.5262   2
  -2  -6  14 92.6049 66.3074   1
  -2   6  14 126.865 76.3814   4
   2  -6 -14 144.739 51.8023   5
   2  -6 -14 202.291 75.6416   3
   2  -6 -14 110.443 31.6995   6
  -2  -6  13 985.415 173.758   1
   2  -6 -13 1071.35 158.243   3
  -2   6  13 1134.86 174.799   4
  -2  -6  13 886.739 147.033   2
   2   6 -13 775.879 136.056   2
   2  -6 -12 6380.90 373.625   3
  -2  -6  12 5441.64 348.073   2
  -2   6  12 5687.25 386.812   4
   2   6 -12 5442.19 332.767   2
  -2  -6  12 5061.78 382.500   1
  -2   6  12 6324.59 352.521   3
  -2   6  11 1433.28 187.525   4
  -2   6  11 1450.82 164.571   3
   2   6 -11 1477.10 166.346   2
   2   6 -11 1564.84 198.338   1
   2  -6 -11 1568.76 179.598   3
  -2  -6  11 1368.50 166.303   2
  -2  -6  11 1428.27 194.125   1
   2  -6 -11 1444.82 192.790   4
  -2   6  10 49.0656 27.8729   4
   2  -6 -10 39.5842 45.6152   3
   2  -6 -10 134.108 60.1815   4
  -2  -6  10 105.650 47.6222   2
   2   6 -10 92.0708 53.1853   1
   2   6 -10 112.876 48.9398   2
  -2   6  10 95.4605 47.1795   3
  -2  -6  10 128.036 59.2842   1
  -2  -6   9 923.158 150.513   1
   2   6  -9 942.938 147.467   1
   2  -6  -9 865.806 125.537   3
  -2   6   9 1029.19 150.612   4
   2  -6  -9 957.468 150.064   4
  -2   6   9 785.374 115.233   3
  -2  -6   9 924.093 126.798   2
  -2  -6   9 883.367 93.9712   7
   2   6  -9 922.867 120.105   2
   2  -6  -8 1087.20 137.710   3
  -2  -6   8 1153.70 100.643   7
  -2   6   8 950.022 122.704   3
  -2  -6   8 1045.42 129.560   2
   2  -6  -8 923.686 140.546   4
  -2  -6   8 1054.67 156.957   1
   2   6  -8 1132.55 154.348   1
  -2  -6   7 28.4314 16.9528   7
  -2   6   7 115.485 45.9074   3
  -2  -6   7 1.86313 33.6149   1
   2   6  -7 23.3578 26.5818   1
   2  -6  -7 124.085 55.3659   4
  -2  -6   7 22.3329 24.4895   2
   2  -6  -7 100.174 39.4181   3
  -2   6   7 64.8152 14.9293   8
   2  -6  -6 1449.47 171.884   4
  -2   6   6 1396.25 144.912   3
  -2   6   6 1286.74 78.0353   8
   2   6  -6 1615.42 173.207   1
   2   6  -6 1453.41 137.641   2
  -2  -6   6 1539.58 105.297   7
  -2  -6   6 1433.67 137.826   2
  -2   6   5 2551.85 194.282   3
  -2  -6   5 2320.90 127.994   7
   2   6  -5 2453.38 208.741   1
   2  -6  -5 2507.07 219.617   4
  -2  -6   5 2398.81 172.698   2
   2   6  -5 2146.05 160.977   2
   2  -6  -4 2367.50 209.390   4
  -2   6   4 2321.37 183.938   3
   2   6  -4 1673.50 137.272   2
   2   6  -4 1796.11 172.493   1
  -2  -6   4 1689.31 141.038   2
  -2  -6   4 1630.72 106.879   7
   2   6  -3 609.150 80.4047   2
  -2  -6   3 589.159 64.7467   7
   2   6  -3 583.248 94.4773   1
  -2   6   3 497.427 84.6400   3
   2  -6  -3 652.729 106.999   4
   2   6  -3 561.172 68.7646   7
  -2  -6   2 3144.91 155.296   7
  -2   6   2 3927.56 240.100   3
   2   6  -2 3054.89 215.982   8
   2   6  -2 3214.30 220.140   1
   2   6  -2 3236.77 170.083   7
   2   6  -2 3083.65 178.200   2
   2  -6  -2 3524.99 245.482   4
   2  -6  -1 1905.37 178.510   4
   2   6  -1 1856.67 135.161   2
  -2   6   1 1744.13 142.649   1
   2   6  -1 1746.29 158.773   3
   2   6  -1 1713.69 157.322   1
  -2   6   1 1485.43 152.792   4
  -2  -6   1 1641.35 160.094   4
   2  -6  -1 1575.88 145.296   1
   2   6  -1 1619.42 122.741   7
   2   6  -1 1623.31 152.313   8
  -2   6   0 21225.7 550.307   1
   2  -6   0 20604.8 575.172   1
   2  -6   0 21049.5 625.337   4
   2   6   0 19634.5 493.065   2
   2   6   0 20479.8 576.688   3
  -2  -6   0 20066.7 596.027   4
   2   6   0 20322.6 558.230   8
  -2   6   0 20062.4 600.590   4
   2   6   0 20785.7 581.991   1
   2   6   0 19920.8 497.236   7
   2   6   1 3098.01 208.350   3
  -2   6  -1 2572.67 119.208   7
   2  -6   1 2765.70 200.377   1
   2   6   1 2808.94 188.722   8
  -2   6  -1 3005.56 193.968   1
  -2  -6  -1 2963.27 213.530   4
   2   6   1 2763.29 166.761   2
   2  -6   1 2937.46 218.848   4
   2   6   1 2933.95 177.582   7
   2   6   1 2973.57 203.905   1
   2  -6   2 95.7513 42.3055   4
   2   6   2 177.633 48.2176   8
  -2   6  -2 63.8187 32.3762   1
   2   6   2 206.993 50.5428   7
   2   6   2 200.305 56.2884   3
  -2   6  -2 65.0377 16.0915   7
  -2  -6  -2 193.937 53.1699   4
   2  -6   3 2940.44 228.337   2
   2   6   3 2630.20 194.763   3
  -2   6  -3 3057.15 205.828   1
  -2   6  -3 2152.01 77.8520   7
   2  -6   3 2889.40 214.267   4
   2   6   3 2529.24 180.784   7
   2   6   3 2422.75 162.145   8
  -2  -6  -3 2663.60 204.933   4
   2   6   4 311.798 56.6090   8
  -2  -6  -4 360.052 75.7735   1
  -2  -6  -4 256.623 70.4159   3
  -2   6  -4 175.899 50.8621   1
   2  -6   4 152.485 54.3230   4
   2  -6   4 208.507 68.9997   2
  -2  -6  -4 273.910 67.8333   4
   2   6   4 236.027 65.4739   7
   2   6   4 284.133 64.3685   3
  -2   6  -5 228.769 69.7909   1
   2   6   5 398.585 60.3271   8
   2  -6   5 239.229 68.2844   2
   2   6   5 363.615 76.3657   7
  -2  -6  -5 398.372 84.3177   4
   2  -6   5 359.004 79.4173   4
  -2  -6  -5 331.102 75.1590   3
   2   6   5 287.726 64.4595   3
  -2  -6  -5 273.350 70.0171   1
   2   6   6 3543.54 243.637   7
   2  -6   6 3771.34 269.546   1
  -2  -6  -6 3369.54 235.913   1
   2  -6   6 3677.79 247.301   4
  -2  -6  -6 3728.94 254.724   3
   2  -6   6 3462.15 262.561   2
   2   6   6 3683.79 242.257   3
  -2  -6  -6 3827.89 251.778   4
  -2   6  -6 3633.69 252.981   1
   2   6   6 3384.78 165.097   8
   2  -6   7 81.7313 50.6651   2
   2   6   7 78.5600 45.8197   3
  -2  -6  -7 61.5278 43.6843   3
  -2   6  -7 49.4550 31.4090   1
   2  -6   7 61.6496 16.3936   7
   2  -6   7 39.3059 34.7161   1
   2   6   7 85.2206 50.3376   7
  -2   6  -7 123.280 51.6132   2
  -2  -6  -7 74.4922 38.5407   4
   2  -6   8 5500.20 182.767   7
  -2  -6  -8 6557.97 360.496   3
  -2   6  -8 5862.90 358.487   2
  -2  -6  -8 6449.81 344.388   4
   2  -6   8 6228.03 371.862   2
   2   6   8 6492.52 351.969   7
   2   6   8 6340.16 336.245   4
  -2   6  -8 5725.79 346.595   1
   2  -6   8 6044.39 365.868   1
   2   6   8 7085.17 354.214   3
   2  -6   9 1206.90 153.521   6
  -2  -6  -9 952.284 135.455   4
  -2   6  -9 1343.31 171.971   1
   2   6   9 1236.44 152.549   3
   2  -6   9 1259.43 167.733   2
   2  -6   9 1308.47 92.2400   7
  -2  -6  -9 1031.03 86.9497   8
  -2   6  -9 1479.34 181.770   2
   2   6   9 985.790 137.983   4
   2  -6   9 1248.68 173.048   1
  -2  -6  -9 1133.67 151.196   3
   2   6   9 1025.21 148.142   7
   2  -6  10 7174.47 385.594   6
  -2  -6 -10 7164.11 400.595   3
   2   6  10 6853.25 394.298   7
   2  -6  10 7502.34 429.623   2
  -2  -6 -10 7433.39 387.497   4
   2   6  10 7852.92 392.733   4
  -2   6 -10 7013.70 413.333   2
  -2   6 -10 7377.98 423.752   1
  -2  -6 -10 7114.97 233.261   8
   2  -6  10 6817.40 242.514   7
   2  -6  10 7234.70 427.804   1
   2   6  10 7141.45 379.725   3
   2   6  11 948.928 151.710   7
  -2  -6 -11 1007.60 82.5751   8
  -2  -6 -11 1034.31 155.798   3
  -2   6 -11 1113.28 169.787   2
  -2  -6 -11 1055.12 152.911   4
   2   6  11 1047.72 144.628   4
   2  -6  11 1248.92 185.482   1
  -2   6 -11 1411.24 190.715   1
   2  -6  11 1096.97 99.6123   7
  -2   6 -12 2992.47 278.662   2
  -2  -6 -12 2891.04 267.904   3
   2  -6  12 2835.96 282.147   1
  -2  -6 -12 2561.77 236.214   4
   2   6  12 2640.11 236.334   4
  -2  -6 -12 2342.69 126.793   8
   2   6  12 2618.15 233.701   2
   2  -6  12 2568.72 166.984   7
   2  -6  13 1710.16 145.643   7
  -2  -6 -13 2256.36 241.077   3
   2   6  13 2316.98 222.764   2
   2  -6  13 1798.87 165.306   5
  -2   6 -13 2024.57 235.112   2
  -2  -6 -13 2061.87 217.224   4
   2  -6  13 1906.44 239.822   1
   2   6  13 1998.43 211.823   4
  -2  -6 -13 1958.35 114.958   8
  -2  -6 -13 2073.16 202.234   6
   2   6  14 3646.06 291.941   4
   2  -6  14 2882.75 207.067   5
  -2   6 -14 2708.54 277.634   2
  -2  -6 -14 3501.92 267.771   6
   2  -6  14 2598.64 188.921   7
  -2  -6 -14 3629.34 313.942   3
  -2  -6 -14 3387.04 289.359   4
   2  -6  14 2936.97 308.201   1
  -2  -6 -14 3012.26 143.319   8
  -2  -6 -15 59.5332 50.5513   4
  -2  -6 -15 13.2923 34.2485   3
   2  -6  15 139.099 52.9935   7
  -2   6 -15 198.279 87.5020   2
  -2  -6 -15 123.279 30.0063   8
   2   6  15 155.140 60.7759   4
  -2  -6 -15 173.386 60.4506   6
   2  -6  15 132.260 70.5484   1
   2  -6  15 188.032 54.9824   5
   2  -6  16 586.613 145.371   1
   2  -6  16 503.285 91.6582   7
  -2  -6 -16 577.111 132.563   3
  -2  -6 -16 437.036 101.985   6
   2  -6  16 460.092 81.9203   5
  -2   6 -16 675.690 143.273   3
   2   6  16 457.450 107.707   4
  -2   6 -16 550.114 128.172   2
   2   6  17-28.0841 42.1572   7
  -2  -6 -17 179.585 89.8935   3
  -2   6 -17 299.150 112.960   2
   2  -6  17 169.223 45.9250   5
   2  -6  17 185.132 58.5757   7
   2   6  17 97.2761 60.1050   4
  -2  -6 -17 81.7299 44.5328   6
  -2   6 -17 184.251 87.5963   3
   2  -6  17 288.183 116.543   1
   2   6  18 42.9063 44.5314   4
  -2   6 -18-8.32696 60.2438   3
  -2  -6 -18 19.3650 34.2530   6
  -2   6 -18-49.3424 58.2105   2
  -2  -6 -18 38.1718 49.4578   3
   2  -6  18 58.0992 40.0460   7
   2   6  18 112.915 74.2217   7
   2   6  19 256.099 92.2689   4
  -2   6 -19 219.760 98.4159   2
  -2   6 -19 219.149 82.1621   3
  -2  -6 -19 150.992 87.2770   3
  -2  -6 -19 300.725 89.0700   6
   2  -6  19 232.266 69.5459   7
   2   6  19 269.157 111.150   7
  -2  -6 -20 312.065 88.5350   6
   2  -6  20 141.666 54.7996   7
   2   6  20 249.964 104.087   7
  -2   6 -20 176.140 79.2191   3
  -2   6 -20 260.798 108.530   2
  -2  -6 -20 178.128 86.7788   3
   2   6  20 175.043 78.4099   4
   2  -6  21 70.9174 51.1989   4
  -2  -6 -21 32.5631 56.3446   6
   2   6  21 59.1562 69.3602   4
   2   6  22 208.609 107.595   4
   2  -6  22 175.223 71.4357   4
  -2   7  22-113.565 80.9687   4
   2   7 -22 5.18375 43.1880   3
   2  -7 -21 941.670 190.837   3
  -2  -7  21 1022.27 229.351   1
  -2   7  21 1041.57 206.571   4
   2   7 -21 953.274 180.084   3
   2   7 -20 100.385 46.4411   3
   2   7 -20 140.477 71.5046   2
  -2  -7  20 146.568 68.6914   1
  -2   7  20 124.939 76.8294   4
   2  -7 -20 53.2616 54.0591   3
  -2   7  19 365.114 118.312   4
   2   7 -19 248.604 93.1600   2
   2   7 -19 158.197 74.9739   3
   2  -7 -19 200.789 83.9950   3
  -2  -7  19 345.288 131.277   1
   2  -7 -18 39.6436 50.7269   3
  -2  -7  18 162.773 80.1181   1
   2  -7 -18 20.2334 27.9955   5
  -2   7  18-44.9513 57.8120   4
   2   7 -18 200.425 82.7400   2
   2  -7 -17 1588.82 222.864   3
   2   7 -17 1418.05 203.457   2
  -2  -7  17 1556.31 249.190   1
  -2   7  17 1336.72 217.225   4
   2  -7 -17 1370.14 116.372   6
   2  -7 -17 1475.63 161.912   5
  -2   7  16 151.516 68.1929   4
   2  -7 -16 203.083 79.6861   3
   2   7 -16 97.3745 53.0977   2
   2  -7 -16 113.541 32.5955   6
  -2  -7  16 230.937 98.5537   1
   2  -7 -16 153.887 57.4858   5
   2   7 -15 7.04958 28.0880   2
  -2  -7  15-21.5127 42.7495   1
  -2   7  15-24.2244 65.8631   4
   2  -7 -15 18.3177 23.9270   6
   2  -7 -15-6.26675 32.2577   3
  -2  -7  14 284.424 108.137   1
  -2   7  14 261.209 92.9079   4
   2  -7 -14 255.336 86.1415   3
   2   7 -14 296.552 85.4169   2
  -2   7  13 104.155 63.2128   4
   2   7 -13 118.559 58.8291   2
   2  -7 -13 45.2130 31.7261   3
  -2  -7  13 162.481 81.7129   1
  -2  -7  12 4582.46 376.918   1
   2   7 -12 4995.12 326.967   2
  -2  -7  12 4964.71 342.291   2
  -2   7  12 4563.03 357.489   4
   2  -7 -12 4429.83 330.080   3
  -2  -7  12 4897.73 245.750   7
   2   7 -11 2580.71 225.489   2
   2  -7 -11 1534.45 191.557   3
  -2  -7  11 2811.38 248.533   2
  -2  -7  11 2762.72 283.779   1
  -2  -7  11 2700.12 169.921   7
  -2   7  11 1787.29 221.375   4
   2  -7 -10 13333.3 560.303   3
   2   7 -10 13616.2 522.662   2
  -2  -7  10 13632.8 634.004   1
  -2   7  10 13243.3 524.987   3
  -2  -7  10 13580.7 542.900   2
  -2   7  10 12870.3 586.433   4
  -2  -7  10 14157.4 395.160   7
   2  -7  -9 1966.68 223.336   4
  -2   7   9 2249.83 234.137   4
  -2  -7   9 1693.89 178.475   2
   2  -7  -9 2085.80 210.657   3
   2   7  -9 1419.70 187.782   1
   2   7  -9 1503.58 165.128   2
  -2   7   9 2163.90 201.089   3
  -2  -7   9 1411.10 196.299   1
  -2  -7   9 1495.52 113.492   7
  -2  -7   8 1608.86 202.157   1
   2   7  -8 1460.95 154.685   2
   2  -7  -8 1391.68 167.024   3
   2   7  -8 1810.18 204.711   1
   2  -7  -8 1220.78 146.893   1
  -2   7   8 1222.48 172.880   4
  -2  -7   8 1500.05 162.852   2
   2  -7  -8 1241.38 172.683   4
  -2  -7   8 1672.25 112.314   7
  -2   7   8 1244.50 152.440   3
   2  -7  -7 273.725 68.7367   1
  -2  -7   7 338.098 77.5378   2
  -2   7   7 267.020 69.8763   3
  -2  -7   7 398.048 95.6584   1
  -2   7   7 222.294 72.9477   4
   2  -7  -7 350.612 97.8336   4
  -2   7   7 222.136 29.0568   8
  -2  -7   7 356.163 50.3834   7
   2   7  -7 450.546 102.627   1
  -2  -7   6 362.876 48.2125   7
   2  -7  -6 467.269 87.7443   1
  -2   7   6 500.981 105.652   4
  -2  -7   6 380.098 94.9118   1
   2  -7  -6 550.521 115.026   4
  -2  -7   6 405.561 80.5250   2
   2   7  -6 327.670 87.9356   1
  -2   7   6 453.862 87.7995   3
   2   7  -5 20.9168 27.4346   1
  -2   7   5 17.8957 27.3812   3
  -2  -7   5-20.4482 38.2369   1
   2  -7  -5 31.7506 19.7777   1
  -2  -7   5 34.1858 17.2933   7
   2  -7  -5 40.6574 39.0618   4
  -2  -7   5 25.2052 32.1657   2
  -2   7   5 59.5880 44.0715   4
  -2  -7   4 791.371 72.8713   7
   2  -7  -4 754.599 107.301   1
  -2  -7   4 693.871 123.142   1
   2   7  -4 807.451 124.621   1
  -2   7   4 871.356 120.287   3
  -2  -7   4 740.604 102.212   2
   2  -7  -4 750.155 125.139   4
  -2   7   4 871.854 132.526   4
   2   7  -4 771.438 100.113   2
   2   7  -3 415.498 61.0619   7
  -2   7   3 502.283 92.6137   3
  -2  -7   3 401.898 52.0894   7
   2   7  -3 335.708 76.8474   1
   2  -7  -3 467.867 87.2422   1
   2   7  -3 432.551 74.4904   2
   2  -7  -3 347.658 86.7545   4
   2  -7  -2 292.815 76.8645   4
  -2   7   2 461.189 97.7915   4
  -2   7   2 431.916 84.8472   3
   2   7  -2 436.983 71.7781   2
  -2  -7   2 406.494 85.5449   4
   2   7  -2 595.132 104.191   1
   2   7  -2 553.976 96.5312   8
   2   7  -2 462.858 66.3687   7
   2   7  -1 3989.53 252.454   8
   2   7  -1 4083.21 263.345   3
  -2   7   1 3526.00 223.854   1
   2   7  -1 3935.56 219.597   2
  -2   7   1 3619.94 259.746   4
   2   7  -1 3899.52 198.143   7
   2  -7  -1 3649.39 267.954   4
  -2  -7   1 4128.49 275.421   4
   2   7  -1 3869.20 255.484   1
   2   7   0 17055.7 487.343   2
   2   7   0 18225.7 575.654   3
   2   7   0 17743.5 563.287   1
   2  -7   0 15811.8 579.957   4
   2   7   0 17401.2 538.393   8
  -2   7   0 16218.3 512.830   1
   2   7   0 16990.9 467.414   7
  -2  -7   0 17305.5 586.991   4
   2   7   1 10453.8 425.908   3
  -2  -7  -1 10177.3 440.872   4
   2   7   1 10228.8 359.633   7
  -2   7  -1 9485.17 385.004   1
   2   7   1 11070.4 432.309   1
  -2   7  -1 8605.41 236.054   7
   2  -7   1 9792.92 441.823   4
   2   7   1 10000.8 387.137   8
   2   7   1 9952.46 360.743   2
  -2   7  -2 15045.8 499.608   1
  -2  -7  -2 16279.6 561.810   4
  -2  -7  -2 15655.7 550.619   1
   2   7   2 16048.8 479.293   8
   2   7   2 15949.6 472.766   7
   2  -7   2 15555.8 557.549   4
   2   7   2 16122.2 540.931   3
  -2  -7  -3 347.318 82.5378   4
   2  -7   3 418.929 89.2880   4
   2   7   3 360.334 73.9360   7
   2  -7   3 413.870 87.9420   1
   2   7   3 281.892 70.2340   3
  -2  -7  -3 293.812 71.9867   1
   2   7   3 212.530 60.4258   8
  -2   7  -3 425.030 82.9156   1
   2   7   4 288.258 67.8029   7
   2  -7   4 286.385 77.6336   4
   2  -7   4 292.508 80.3404   2
   2   7   4 249.489 54.6059   8
   2   7   4 282.708 73.6363   3
  -2  -7  -4 210.152 66.5550   1
  -2  -7  -4 283.400 75.4659   4
  -2   7  -4 219.716 73.4315   2
   2  -7   4 240.142 69.7236   1
  -2   7  -4 196.009 58.4977   1
  -2  -7  -5 6863.92 364.282   1
   2   7   5 7173.06 358.828   3
   2   7   5 6955.14 340.008   7
   2   7   5 7012.15 272.137   8
   2  -7   5 6800.81 377.867   1
  -2   7  -5 6917.75 390.872   2
  -2   7  -5 7483.33 372.618   1
   2  -7   5 6904.00 367.916   4
   2   7   5 6824.79 361.475   4
  -2  -7  -5 7091.26 371.993   3
  -2  -7  -5 6788.38 363.713   4
   2  -7   5 7163.25 394.851   2
   2   7   6 5300.94 319.076   4
   2   7   6 5235.55 308.366   3
  -2  -7  -6 4904.77 310.492   4
   2  -7   6 4916.49 313.473   4
  -2  -7  -6 5048.81 310.485   1
   2  -7   6 5665.00 351.962   1
   2  -7   6 5138.25 340.434   2
  -2  -7  -6 5250.16 323.306   3
   2   7   6 4910.90 299.228   7
  -2   7  -6 5489.40 329.012   1
   2   7   6 5078.32 215.649   8
  -2   7  -6 5248.86 341.415   2
  -2  -7  -7 262.066 76.0397   1
   2   7   7 94.6166 51.5415   7
   2  -7   7 36.2157 24.8132   4
   2   7   7 192.267 38.3914   8
   2  -7   7 58.0062 32.4726   2
   2   7   7 235.928 74.0344   4
   2   7   7 94.7548 40.7491   3
   2  -7   7 11.3566 26.2502   1
  -2   7  -7-0.18079 39.0524   2
  -2  -7  -7 114.446 53.2691   4
  -2   7  -7 27.6863 28.3066   1
  -2  -7  -7 223.594 73.4063   3
  -2   7  -8 68.7484 48.2538   1
  -2  -7  -8 199.977 71.7664   3
   2   7   8 90.0432 61.3781   7
   2  -7   8 106.587 54.5733   2
   2  -7   8 132.744 65.1610   1
  -2  -7  -8 132.242 52.8962   4
  -2  -7  -8 129.660 46.5164   1
  -2   7  -8 192.232 73.3387   2
   2   7   8 160.923 60.2958   4
   2   7   8 131.990 52.7462   3
  -2  -7  -9-36.0578 33.5790   4
  -2   7  -9-2.55705 32.4888   2
   2   7   9 34.8812 35.1439   4
   2  -7   9 13.4328 39.0955   1
  -2  -7  -9 65.8025 43.3889   3
  -2   7  -9-48.5352 46.0676   1
   2   7   9 19.2069 34.0815   7
   2  -7   9-3.09350 7.52143   7
   2   7  10 233.684 79.4698   7
  -2   7 -10 157.824 70.9423   1
   2  -7  10 147.745 27.4312   7
  -2  -7 -10 279.583 83.1806   3
  -2  -7 -10 324.991 88.4641   4
  -2   7 -10 124.768 56.5196   2
   2  -7  10 82.7891 49.1034   1
   2   7  10 239.520 73.7829   4
   2   7  11 385.589 109.281   7
  -2  -7 -11 372.960 97.3907   3
  -2  -7 -11 470.389 106.524   4
   2  -7  11 309.909 45.4122   7
   2   7  11 367.509 87.4425   4
  -2   7 -11 225.716 76.2324   2
   2  -7  11 388.783 108.931   1
  -2  -7 -12 4732.79 352.906   3
   2   7  12 4113.15 322.747   7
  -2  -7 -12 4264.72 322.340   4
   2   7  12 4306.21 322.172   4
   2  -7  12 4877.21 387.244   1
   2  -7  12 4249.73 194.821   7
  -2   7 -12 5070.98 378.908   2
  -2  -7 -13 749.458 136.841   4
   2   7  13 603.146 141.408   7
  -2   7 -13 605.494 133.984   2
   2  -7  13 899.053 169.411   1
   2   7  13 770.105 137.617   4
   2  -7  13 643.859 79.7643   7
  -2  -7 -13 839.467 153.788   3
  -2  -7 -14-21.6828 47.8645   3
   2   7  14 27.7799 51.2099   7
   2  -7  14 87.7573 59.5978   1
   2  -7  14 102.558 51.3608   5
  -2   7 -14-1.96570 35.7117   2
   2   7  14 20.8286 33.8005   4
   2  -7  14 8.27230 21.3223   7
  -2  -7 -14 109.990 65.6354   6
   2  -7  15 36.6618 44.0402   5
  -2   7 -15 3.36487 40.0299   2
   2   7  15 46.1283 32.4250   7
   2  -7  15 7.04327 38.8669   1
  -2  -7 -15 25.2785 43.9039   6
   2  -7  15 24.7654 23.2570   7
  -2  -7 -15 51.4462 50.6336   3
   2   7  15 19.1777 55.6217   4
  -2  -7 -16 237.737 85.3321   3
   2   7  16 265.835 105.533   7
  -2  -7 -16 217.538 79.1348   6
   2   7  16 238.625 88.9673   4
  -2   7 -16 105.703 63.2708   2
   2  -7  16 228.690 56.7419   7
   2  -7  16 164.168 49.3777   5
   2  -7  16 277.854 97.4420   1
  -2   7 -17 586.918 144.676   2
  -2  -7 -17 390.079 97.7420   6
   2   7  17 131.190 80.0441   7
   2  -7  17 483.735 88.9235   5
  -2  -7 -17 376.585 119.937   3
   2   7  17 424.006 115.223   4
   2  -7  17 394.473 125.624   1
   2  -7  17 455.738 85.1147   7
   2   7  18 63.9352 62.2602   7
   2   7  18 105.766 54.7053   4
  -2   7 -18 26.3396 46.5517   2
  -2  -7 -18 61.0691 63.4875   3
  -2  -7 -18 33.5101 37.0873   6
   2  -7  18 168.766 101.202   1
  -2   7 -18 139.857 99.8972   3
  -2   7 -19-14.2900 59.5814   2
  -2  -7 -19 44.6349 48.3296   3
   2   7  19-15.7857 33.5090   4
  -2   7 -19-43.4414 64.3980   3
   2   7  19-84.7966 60.8676   7
  -2  -7 -19 1.37491 31.0031   6
  -2  -7 -20 485.749 114.433   6
   2   7  20 578.205 140.468   4
   2   7  21 6.77197 50.8526   4
   2  -7  22 1803.27 273.839   4
  -2   8  21 68.6016 85.3755   4
   2   8 -21 66.7404 68.7549   3
   2   8 -20 98.1487 80.5349   2
   2   8 -20 67.9850 53.8950   3
  -2  -8  20 35.1416 57.5664   1
  -2   8  20 41.6340 60.3027   4
   2  -8 -20 89.8500 61.2473   3
  -2  -8  19 559.345 156.867   1
   2  -8 -19 355.036 116.641   3
   2   8 -19 455.485 126.594   2
  -2   8  19 243.046 93.2504   4
   2  -8 -18-49.0974 34.0388   5
  -2  -8  18 43.9499 78.3195   1
   2  -8 -18 158.606 96.2986   3
   2   8 -18-14.9439 52.0313   2
  -2   8  18 64.6426 58.0746   4
   2   8 -17 201.924 91.3296   2
   2  -8 -17 301.930 82.8757   5
   2  -8 -17 369.911 111.092   3
  -2  -8  17 279.674 108.983   1
  -2   8  17 209.904 93.3959   4
   2   8 -16 135.854 72.7720   2
   2  -8 -16 302.625 101.602   3
  -2   8  16 354.160 114.856   4
  -2  -8  16 241.746 97.6007   1
   2  -8 -16 243.787 56.9444   6
   2  -8 -15 1042.63 177.695   3
  -2  -8  15 817.194 185.070   1
   2   8 -15 889.765 156.193   2
  -2   8  15 1041.32 192.238   4
   2  -8 -14 94.1492 60.3356   3
  -2  -8  14 35.3590 35.8211   1
  -2   8  14 104.766 69.9704   4
   2   8 -14 89.8306 57.2085   2
  -2  -8  14 25.6293 23.7090   7
   2   8 -13 149.733 60.8135   2
  -2  -8  13 107.944 38.2118   1
  -2   8  13 261.086 96.7666   4
  -2  -8  13 210.168 48.3015   7
   2  -8 -13 261.977 82.5122   3
  -2  -8  12-26.9781 43.1487   1
   2  -8 -12 49.1908 51.7356   3
  -2  -8  12 17.1669 17.1091   7
  -2   8  12-8.78021 42.3085   4
   2   8 -12 11.4213 32.2994   2
  -2  -8  11 4614.16 385.761   1
   2   8 -11 4369.60 309.630   2
  -2   8  11 3275.82 312.783   4
  -2  -8  11 4027.82 189.616   7
  -2  -8  11 4750.54 333.267   2
   2  -8 -11 3402.07 300.596   3
   2  -8 -10 6925.90 421.663   3
   2  -8 -10 6993.71 396.043   1
  -2  -8  10 8412.40 435.081   2
  -2  -8  10 8384.55 514.720   1
   2   8 -10 8133.48 414.408   2
  -2   8  10 7070.29 451.843   4
  -2  -8  10 8020.20 257.031   7
   2  -8  -9 5074.91 328.240   1
   2   8  -9 5761.58 338.198   2
  -2   8   9 5536.34 390.978   4
  -2  -8   9 5808.48 415.850   1
  -2  -8   9 5541.59 199.909   7
  -2  -8   9 5884.53 351.709   2
  -2  -8   8 1208.51 154.394   2
  -2   8   8 1245.27 161.326   3
   2  -8  -8 1066.46 146.069   1
  -2  -8   8 1087.42 81.1080   7
  -2   8   8 1201.44 182.132   4
   2   8  -8 1019.43 139.467   2
  -2  -8   8 1050.02 170.064   1
   2   8  -7 95.2279 41.2809   1
  -2  -8   7 68.4379 43.3851   2
  -2   8   7 288.042 79.5209   3
   2  -8  -7 294.354 80.0619   1
  -2   8   7 327.487 97.2170   4
   2  -8  -7 319.058 91.6458   4
  -2  -8   7 149.784 73.0385   1
   2   8  -7 170.935 59.2329   2
  -2   8   7 242.264 34.2204   8
  -2  -8   7 116.550 28.5385   7
   2  -8  -6 1681.07 180.593   1
  -2   8   6 1807.60 190.884   3
  -2  -8   6 1908.40 182.525   2
   2   8  -6 1795.38 203.177   1
  -2  -8   6 1932.60 225.805   1
   2  -8  -6 1717.07 210.198   4
   2   8  -6 1791.57 171.391   2
  -2   8   6 1685.87 199.834   4
  -2  -8   6 1721.70 102.383   7
   2  -8  -5 1220.39 149.893   1
  -2  -8   5 1139.67 139.934   2
  -2  -8   5 1093.00 164.253   1
   2   8  -5 1351.11 172.965   1
  -2   8   5 1212.14 157.122   3
  -2   8   5 1255.25 171.678   4
   2  -8  -5 1210.56 172.791   4
   2   8  -4 106.483 51.0638   1
  -2  -8   4 144.381 58.0945   1
   2  -8  -4 262.120 70.8311   1
   2  -8  -4 264.572 86.5326   4
  -2   8   4 264.636 80.9481   4
  -2   8   4 299.761 81.7634   3
  -2   8   3 4521.49 319.758   2
  -2   8   3 3846.91 295.128   4
   2  -8  -3 3703.00 263.759   1
   2   8  -3 3962.83 189.726   7
   2  -8  -3 4327.64 317.554   4
   2   8  -3 3634.27 271.359   1
  -2  -8   3 4101.46 297.745   4
  -2  -8   3 4117.97 311.004   1
  -2   8   3 4390.95 296.575   3
  -2   8   2 115.680 59.3822   3
  -2  -8   2 40.5954 39.5539   4
   2   8  -2 52.8583 43.4756   3
   2   8  -2 15.9008 32.0686   1
  -2   8   2 71.4877 42.0662   4
  -2  -8   2 28.4362 35.9436   1
   2  -8  -2 45.7943 27.4089   4
   2  -8  -2 35.6867 34.6198   1
   2   8  -2 37.2778 36.1252   8
  -2   8   2 22.9305 30.3710   2
   2   8  -2 27.1173 14.6475   7
   2   8  -1 761.867 123.648   1
   2   8  -1 1000.54 138.828   3
  -2   8   1 1082.30 133.644   1
  -2   8   1 786.854 132.552   2
   2   8  -1 988.002 132.146   8
   2  -8  -1 916.268 134.425   1
  -2  -8   1 927.411 141.564   4
   2  -8  -1 882.355 139.661   4
   2   8  -1 857.881 95.3497   7
  -2  -8   1 837.209 137.442   1
  -2   8   1 986.699 140.534   3
   2   8   0 275.180 70.5514   8
   2   8   0 219.505 52.4907   7
  -2  -8   0 151.244 60.0865   4
  -2   8   0 231.904 73.2408   2
   2  -8   0 276.091 73.6580   4
   2   8   0 208.883 61.4267   1
  -2  -8   0 154.956 57.5489   1
   2   8   0 181.228 61.9551   3
  -2   8   0 242.429 64.9633   1
   2  -8   0 178.542 61.3816   1
   2  -8   1 495.480 99.2402   1
  -2   8  -1 474.800 104.717   2
  -2   8  -1 428.116 84.8362   1
  -2  -8  -1 460.946 99.7016   1
  -2   8  -1 415.612 46.9013   7
  -2  -8  -1 512.350 108.512   4
   2  -8   1 526.189 112.970   4
   2   8   1 506.988 88.8377   8
   2   8   1 621.576 89.6560   7
   2   8   1 554.971 103.713   3
   2   8   2 136.825 50.9545   8
   2   8   2 41.5095 31.7924   3
  -2   8  -2 155.722 64.2265   2
  -2   8  -2 200.190 54.2396   1
   2  -8   2 259.598 77.7980   1
  -2  -8  -2 180.735 69.1231   4
  -2  -8  -2 26.3756 33.6073   1
   2  -8   2 259.907 75.4579   4
   2   8   2 136.214 45.5760   7
   2   8   3 1762.15 187.416   3
  -2   8  -3 1622.58 171.712   1
  -2   8  -3 1674.06 195.609   2
   2  -8   3 1836.29 199.370   1
  -2  -8  -3 1821.22 197.916   4
  -2  -8  -3 1644.42 186.714   1
   2  -8   3 1517.90 182.893   4
   2   8   3 1662.61 153.318   8
   2   8   3 1678.74 157.799   7
   2  -8   4 10277.6 483.334   4
  -2   8  -4 9869.95 445.639   1
  -2  -8  -4 8965.11 446.259   1
   2   8   4 9372.87 356.391   8
   2   8   4 9519.94 439.821   3
  -2   8  -4 10305.5 498.744   2
  -2  -8  -4 9998.91 472.157   4
   2   8   4 9575.92 403.471   7
   2  -8   4 10044.4 482.992   1
   2   8   5 100.285 43.4690   7
  -2   8  -5 15.5052 26.5102   1
   2   8   5 77.5074 32.2859   8
  -2  -8  -5 88.3716 60.6630   4
   2  -8   5 22.2669 26.2416   2
   2  -8   5 94.8787 58.8210   4
  -2  -8  -5 49.1373 34.7382   1
  -2   8  -5 61.4396 44.7042   2
   2  -8   5 130.322 63.4770   1
   2   8   5 71.9307 33.7470   3
   2   8   6 3147.29 252.196   3
  -2  -8  -6 3292.11 267.847   1
   2  -8   6 3212.39 281.345   1
   2   8   6 2981.44 172.875   8
  -2   8  -6 3174.27 261.672   1
   2  -8   6 3115.93 277.984   2
   2   8   6 3115.69 261.903   4
  -2   8  -6 3384.80 285.554   2
  -2  -8  -6 3003.56 257.935   4
   2  -8   6 3183.10 268.685   4
   2   8   6 3133.12 243.918   7
   2   8   7-14.8602 29.2675   7
  -2  -8  -7 43.4938 50.7373   3
   2   8   7 72.6275 39.9596   4
  -2   8  -7 48.9026 28.9924   1
  -2  -8  -7 17.3101 27.4376   1
  -2   8  -7 44.2801 45.3740   2
   2  -8   7 11.1477 27.6619   1
  -2  -8  -7-5.49357 31.7568   4
   2   8   7 47.4356 26.8279   8
   2  -8   7 54.3077 41.8978   4
   2  -8   8 180.393 74.0697   1
  -2  -8  -8 159.536 69.5383   1
  -2   8  -8 255.513 81.6126   2
  -2  -8  -8 142.150 70.5789   3
  -2   8  -8 224.245 72.5852   1
  -2  -8  -8 47.6290 36.9663   4
   2   8   8 131.729 60.8892   4
   2   8   8 108.947 65.4534   7
   2  -8   8 219.029 68.0722   4
  -2  -8  -9 170.748 69.6522   3
  -2   8  -9 103.944 62.1924   2
   2  -8   9 146.603 64.2097   1
   2  -8   9 127.459 50.8855   4
  -2  -8  -9-23.7562 62.4763   4
   2   8   9 134.681 66.9879   4
  -2  -8  -9 133.225 60.6462   1
   2   8   9 272.684 78.2755   7
  -2  -8 -10 4043.41 327.124   3
  -2   8 -10 3882.66 330.915   2
  -2  -8 -10 3737.64 306.371   1
   2   8  10 3647.83 301.046   4
   2   8  10 3678.38 304.576   7
   2  -8  10 4045.25 346.074   1
  -2  -8 -10 3767.01 308.763   4
   2   8  11 2875.39 275.135   7
  -2  -8 -11 2662.81 264.035   4
   2   8  11 2881.30 271.290   4
  -2   8 -11 2656.54 279.637   2
  -2  -8 -11 2925.96 276.359   1
   2  -8  11 2647.16 288.349   1
  -2  -8 -11 2781.89 277.695   3
  -2  -8 -12 1101.33 179.515   3
   2   8  12 957.925 162.789   7
  -2   8 -12 883.221 163.937   2
   2   8  12 957.959 159.800   4
   2  -8  12 713.690 152.647   1
   2   8  13 2362.95 266.236   7
   2  -8  13 2702.35 310.930   1
  -2   8 -13 2775.38 294.354   2
   2   8  13 2572.98 263.951   4
   2  -8  13 1850.59 103.773   7
  -2  -8 -13 2816.19 291.244   3
   2  -8  14 365.604 52.3543   7
   2   8  14 468.639 126.414   7
   2  -8  14 592.229 154.921   1
  -2  -8 -14 464.212 121.387   3
   2   8  14 521.897 122.766   4
  -2   8 -14 741.586 157.104   2
  -2  -8 -15 437.120 122.054   3
   2   8  15 122.574 67.3971   7
   2  -8  15 237.357 104.137   1
   2   8  15 214.205 84.0946   4
   2  -8  15 286.143 81.0755   5
  -2   8 -15 301.385 108.541   2
  -2  -8 -15 162.463 67.3001   6
   2   8  16 557.383 144.796   7
  -2  -8 -16 864.191 175.560   3
   2  -8  16 685.403 117.588   5
  -2  -8 -16 733.254 137.537   6
  -2   8 -16 770.489 169.557   2
   2   8  16 934.315 169.038   4
   2  -8  16 667.281 173.855   1
   2  -8  17 490.762 141.695   1
  -2  -8 -17 335.426 114.233   3
   2   8  17 341.713 110.074   4
  -2   8 -17 413.765 119.216   2
  -2  -8 -17 395.249 114.804   6
   2   8  17 339.926 118.163   7
   2   8  18 457.774 137.303   7
  -2  -8 -18 400.059 115.002   6
  -2  -8 -18 746.679 173.259   3
  -2   8 -18 448.444 147.767   2
   2  -8  18 397.641 134.071   1
   2   8  18 529.956 132.676   4
  -2  -8 -19 488.644 115.762   6
   2   8  19 341.600 113.938   4
   2  -8  19 415.928 143.859   1
   2   8  20 208.616 93.9260   4
   2   8  21 33.5760 47.8292   4
   2   9 -20 1527.96 239.131   2
   2   9 -19 355.610 113.217   2
   2  -9 -19 637.022 158.727   3
  -2   9  19 488.147 152.437   4
  -2   9  18 2312.04 313.571   4
   2  -9 -18 1981.52 216.585   5
   2  -9 -18 2157.92 288.158   3
   2   9 -18 1833.84 247.570   2
  -2  -9  18 1526.87 279.900   1
   2  -9 -17 1453.17 229.054   3
   2   9 -17 1267.75 201.886   2
  -2  -9  17 1409.98 258.483   1
   2  -9 -17 1342.45 180.163   5
  -2   9  17 1237.41 222.952   4
   2  -9 -16 116.334 77.5769   3
  -2  -9  16 245.871 117.414   1
  -2   9  16 149.222 79.2005   4
   2   9 -16 242.441 98.6469   2
   2   9 -15 651.070 142.973   2
   2  -9 -15 1038.88 188.468   3
  -2  -9  15 613.623 158.327   1
  -2   9  15 1034.14 194.867   4
   2  -9 -14 2312.34 275.635   3
   2   9 -14 1933.44 230.471   2
  -2   9  14 2129.20 276.027   4
  -2  -9  14 2160.97 293.966   1
   2  -9 -13 26.8168 56.0548   3
  -2   9  13 39.0690 60.3562   4
   2  -9 -13 73.6389 60.7812   1
  -2  -9  13-5.54833 61.6681   1
   2   9 -13 29.1658 48.2569   2
  -2  -9  12 3063.71 335.682   1
   2  -9 -12 2941.04 293.301   3
  -2   9  12 3379.17 335.173   4
  -2  -9  12 2219.63 122.556   7
   2   9 -12 3058.26 276.271   2
   2  -9 -12 3090.47 285.403   1
   2   9 -11 47.0132 36.9104   2
  -2  -9  11 135.757 75.1137   1
  -2  -9  11 33.7182 16.0577   7
   2  -9 -11 27.7696 35.2720   1
  -2   9  11 79.6194 57.6058   4
   2   9 -10 2105.21 217.697   2
  -2  -9  10 2069.42 265.957   1
  -2  -9  10 2223.40 231.103   2
   2  -9 -10 2218.18 231.228   1
  -2   9  10 2242.43 262.274   4
  -2   9   9 327.727 100.782   4
   2  -9  -9 337.500 88.9698   1
  -2  -9   9 375.223 103.028   1
  -2  -9   9 208.831 31.7441   7
  -2  -9   9 446.666 101.933   2
   2   9  -9 452.807 102.920   2
  -2  -9   8 14988.3 700.151   1
  -2  -9   8 14784.0 584.069   2
   2  -9  -8 13548.2 574.871   1
  -2   9   8 14220.2 653.490   4
   2   9  -8 14833.4 573.808   2
  -2   9   7 191.221 34.1520   8
  -2  -9   7 73.9083 55.0090   2
   2  -9  -7 151.199 61.3013   1
   2   9  -7 80.5726 49.5268   2
  -2  -9   7 12.3366 40.3292   1
  -2   9   7 161.839 68.6501   4
  -2  -9   6 8388.76 503.693   1
  -2   9   6 9499.77 513.929   4
   2   9  -6 8489.37 410.940   2
   2  -9  -6 10239.4 481.963   1
  -2  -9   5 2244.59 252.362   1
   2  -9  -5 3221.03 263.546   1
   2   9  -5 2244.59 203.565   2
  -2   9   5 3575.80 306.818   4
  -2   9   4 954.751 158.841   4
  -2  -9   4 741.610 143.556   1
   2   9  -4 613.831 107.339   2
   2  -9  -4 1095.56 154.112   1
  -2   9   3 4652.04 343.425   2
  -2   9   3 4753.42 344.771   4
   2   9  -3 3435.51 178.611   7
   2  -9  -3 4597.61 315.336   1
   2   9  -3 3483.44 246.957   2
  -2  -9   3 3589.60 297.554   4
  -2   9   3 5040.46 337.513   3
  -2  -9   3 3462.48 307.445   1
   2   9  -2 1996.96 210.748   3
  -2   9   2 2102.41 226.177   4
  -2  -9   2 2176.47 229.861   4
   2   9  -2 1905.30 181.370   2
   2   9  -2 1925.33 198.430   8
  -2   9   2 2107.65 228.981   2
  -2  -9   2 1795.67 215.351   1
   2  -9  -2 2239.40 221.760   1
  -2   9   2 2176.45 220.415   3
   2   9  -2 1899.77 138.535   7
  -2  -9   1 1254.61 174.596   4
  -2  -9   1 1221.68 177.989   1
  -2   9   1 1310.66 169.636   3
   2  -9  -1 1091.02 155.949   1
   2  -9  -1 1357.27 184.569   4
   2   9  -1 1240.86 166.002   3
  -2   9   1 1476.54 186.673   2
   2   9  -1 1298.31 160.248   8
   2   9  -1 1279.32 120.027   7
  -2  -9   0 152.419 65.5217   1
   2   9   0 44.3570 37.7941   3
  -2   9   0 1.55568 31.3615   2
   2   9   0 37.0457 28.7568   8
  -2   9   0 30.3801 21.8531   1
   2  -9   0 10.2671 26.1708   1
   2  -9   0 35.0145 45.0445   4
   2   9   0 16.7199 22.0709   7
  -2  -9   0 131.144 58.0973   4
  -2   9  -1 347.965 38.3280   7
   2  -9   1 372.033 97.6128   1
   2   9   1 389.672 83.1553   8
  -2  -9  -1 541.761 119.411   4
  -2   9  -1 378.302 83.4750   1
   2  -9   1 498.940 116.963   4
  -2   9  -1 383.098 100.901   2
   2   9   1 514.565 82.6350   7
  -2  -9  -1 451.277 107.740   1
   2   9   1 430.399 98.0606   3
   2   9   2 179.323 57.2593   7
  -2   9  -2 301.497 75.6703   1
   2   9   2 130.646 52.7655   3
  -2  -9  -2 63.1586 42.5837   1
   2   9   2 77.8380 44.8691   2
  -2   9  -2 279.151 87.7397   2
   2  -9   2 320.944 88.1756   4
  -2  -9  -2 96.8521 55.0275   4
   2  -9   2 299.191 86.2256   1
   2   9   2 147.804 53.6155   8
   2   9   3 3448.22 276.940   3
   2   9   3 3291.15 232.358   7
   2   9   3 3140.45 224.575   8
  -2   9  -3 3252.41 258.490   1
  -2  -9  -3 3246.98 282.694   4
   2   9   3 3168.76 235.987   2
  -2  -9  -3 2966.93 269.388   1
  -2   9  -3 3252.88 288.665   2
   2  -9   3 3081.22 278.195   4
   2  -9   3 3381.27 288.848   1
  -2  -9  -4 242.288 82.6786   1
   2  -9   4 224.959 82.9392   1
   2  -9   4 257.252 83.6457   4
   2   9   4 277.339 73.1483   7
  -2   9  -4 234.092 64.6117   1
  -2   9  -4 359.842 101.922   2
   2   9   4 310.255 69.5780   8
  -2  -9  -4 326.686 93.8881   4
  -2   9  -5 12.0930 36.2002   2
   2   9   5 120.342 41.3919   8
  -2   9  -5 0.53566 23.6861   1
  -2  -9  -5 87.0134 56.1940   1
   2  -9   5 5.90129 39.0493   1
  -2  -9  -5 31.9273 42.3458   4
   2   9   5 74.6044 47.0565   7
   2   9   6 55.2998 36.7584   7
   2  -9   6 53.4099 41.2248   1
   2   9   6 96.4671 30.2342   8
  -2  -9  -6 111.015 55.6055   1
  -2  -9  -6 82.6387 37.5520   4
  -2   9  -6 203.695 81.8105   2
  -2  -9  -7 181.201 66.3703   1
   2   9   7 133.480 57.7371   7
  -2   9  -7 372.356 100.865   2
   2  -9   7 270.710 89.0787   1
   2   9   7 163.477 41.2741   8
   2   9   8 663.245 132.147   7
  -2   9  -8 674.236 141.942   2
  -2  -9  -8 727.611 141.847   1
   2   9   8 669.425 133.490   4
   2  -9   8 585.122 133.374   1
   2  -9   9 7164.71 479.195   1
  -2  -9  -9 6964.95 433.226   1
   2   9   9 6679.84 409.961   7
  -2   9  -9 6829.68 456.350   2
   2   9   9 6613.85 421.896   4
  -2  -9  -9 7166.34 456.150   3
  -2  -9 -10 1268.33 196.880   3
   2   9  10 1097.31 174.989   4
  -2   9 -10 1155.29 192.469   2
   2  -9  10 1161.88 195.221   1
  -2  -9 -10 1230.54 185.369   1
   2   9  10 1346.53 186.761   7
   2   9  11 345.644 102.788   4
  -2  -9 -11 302.122 98.1503   3
   2   9  11 275.861 93.6406   7
   2  -9  11 198.095 94.2748   1
  -2   9 -11 216.040 88.6167   2
  -2  -9 -11 216.481 84.9123   1
  -2  -9 -12 1430.24 214.611   3
   2  -9  12 1138.76 208.595   1
   2   9  12 1130.79 181.489   4
  -2   9 -12 1252.04 202.518   2
   2   9  12 1285.50 193.940   7
  -2  -9 -12 1346.70 201.514   1
   2  -9  13 149.443 72.2255   1
  -2  -9 -13 144.647 81.0033   1
  -2  -9 -13 62.4550 54.4704   3
   2   9  13 176.684 88.3008   7
   2   9  13 118.894 73.6139   4
  -2   9 -13 114.080 63.0050   2
  -2  -9 -14 183.084 84.7629   1
  -2  -9 -14 244.724 100.875   3
  -2   9 -14 295.595 110.073   2
   2  -9  14 223.077 103.771   1
   2   9  14 403.511 120.607   7
   2   9  14 280.265 95.5524   4
   2   9  15 352.811 118.718   7
  -2   9 -15 467.725 136.419   2
   2  -9  15 424.225 133.253   1
   2   9  15 338.117 103.749   4
  -2  -9 -15 445.985 135.046   3
  -2  -9 -16 156.924 73.2912   6
   2  -9  16 88.6323 47.1380   1
   2   9  16 328.156 123.370   7
  -2  -9 -16 207.108 88.9269   3
   2   9  16 128.314 77.8806   4
  -2   9 -16 208.469 93.3200   2
   2  -9  16 228.730 67.6160   5
  -2  -9 -17 84.8523 80.5738   3
  -2  -9 -17 25.2404 42.6038   6
  -2   9 -17 84.6080 78.4755   2
   2   9  17 32.7794 58.7940   7
   2   9  17 73.7206 51.0971   4
   2  -9  17 66.9514 68.9789   1
   2   9  18 234.901 97.2800   4
   2   9  18 141.854 64.5931   7
   2  -9  18 187.525 86.1343   1
  -2  -9 -18 233.450 86.4248   6
   2   9  19 681.825 157.942   4
   2   9  20-57.3648 58.9308   4
   2  10 -19-20.6145 54.9763   2
   2  10 -18-24.9050 48.4092   2
  -2  10  18 74.8191 82.9506   4
  -2  10  17 159.180 85.5894   4
   2 -10 -17 230.309 99.6387   1
   2 -10 -17 132.917 77.6861   3
  -2 -10  17 50.1038 48.9159   1
   2  10 -17 225.978 96.2419   2
   2 -10 -16 487.346 135.338   3
   2  10 -16 767.320 162.038   2
   2 -10 -16 716.073 158.656   1
  -2  10  16 638.928 159.565   4
  -2 -10  16 739.602 192.006   1
   2  10 -15 118.637 76.8955   2
  -2 -10  15 77.1460 102.238   1
   2 -10 -15-49.3902 68.1322   3
  -2  10  15-58.2436 44.8854   4
   2 -10 -15-12.5340 50.2166   1
   2  10 -14-15.1633 32.1085   2
   2 -10 -14-10.9810 48.2718   1
  -2 -10  14 58.8138 73.8710   1
  -2  10  14-52.4504 62.7701   4
  -2  10  13 146.934 77.1317   4
   2  10 -13 138.667 78.1134   2
   2 -10 -13 207.282 81.3501   1
  -2 -10  13 198.476 108.263   1
   2  10 -12-43.7193 42.8152   2
   2 -10 -12 44.7828 46.6692   1
  -2 -10  12 66.4296 70.3841   1
  -2  10  12 10.1928 52.7515   4
  -2 -10  11 32.6908 49.9290   1
   2 -10 -11 11.1653 28.2610   1
   2  10 -11 25.6563 42.1240   2
  -2  10  11-6.74024 57.2706   4
   2 -10 -10 257.952 90.4974   1
   2  10 -10 412.167 98.0702   2
  -2  10  10 426.694 121.282   4
  -2 -10  10 360.047 120.297   1
  -2  10   9 25.6135 43.8626   4
   2 -10  -9-4.49671 31.1207   1
   2  10  -9-21.5442 32.0352   2
  -2 -10   9-90.2751 58.3293   1
   2 -10  -8 1870.50 220.017   1
  -2 -10   8 1188.26 170.839   2
  -2 -10   8 1199.58 202.898   1
   2  10  -8 1186.58 168.278   2
  -2  10   8 1855.13 239.174   4
   2 -10  -7 1823.85 218.326   1
  -2 -10   7 1705.30 243.467   1
   2  10  -7 1566.73 188.158   2
  -2  10   7 2042.98 249.364   4
  -2 -10   6 1674.50 242.685   1
  -2  10   6 2423.69 268.967   4
   2 -10  -6 2353.10 246.148   1
   2  10  -6 1569.58 183.366   2
   2  10  -5 8136.00 417.237   2
   2 -10  -5 9041.44 480.719   1
  -2 -10   5 7853.16 506.570   1
  -2  10   5 8809.04 513.251   4
  -2  10   4 2455.95 268.390   2
   2 -10  -4 2244.15 236.366   1
  -2  10   4 2351.49 260.676   4
   2  10  -4 1579.21 182.472   2
  -2 -10   4 1372.32 208.109   1
   2  10  -3 3629.75 270.121   2
   2 -10  -3 4064.28 319.164   1
  -2 -10   3 3588.89 329.076   1
  -2  10   3 4630.61 359.297   2
   2  10  -3 3838.47 304.165   8
   2  10  -2 243.319 78.6407   8
   2 -10  -2 266.817 78.4657   1
   2  10  -2 154.069 55.8909   2
  -2 -10   2 170.998 62.2502   1
  -2  10   2 267.855 96.1012   2
   2  10  -2 231.273 50.7768   7
   2  10  -1 218.062 51.0541   7
  -2 -10   1 236.988 88.2246   1
   2 -10  -1 84.7078 50.5326   1
   2  10  -1 190.132 61.6369   2
   2  10  -1 149.979 57.4512   8
  -2  10   1 103.631 39.4561   2
  -2  10   0 312.014 42.0599   7
   2  10   0 172.331 60.4840   2
  -2 -10   0 209.807 76.3444   1
   2 -10   0 294.958 87.4737   1
  -2  10   0 183.464 52.2030   2
   2  10   0 311.650 79.8292   8
   2  10   0 315.470 65.8653   7
   2  10   1 2409.27 185.103   7
   2  10   1 2477.78 221.303   8
   2  10   1 2379.04 213.649   2
  -2 -10  -1 2812.04 279.987   1
   2 -10   1 2398.58 255.016   1
  -2  10  -1 2238.48 247.851   2
  -2 -10  -2 672.585 138.215   1
   2 -10   2 560.904 124.665   1
  -2  10  -2 580.543 132.500   2
   2  10   2 534.545 104.290   2
   2  10   2 705.564 106.179   7
   2  10   2 642.052 109.998   8
   2  10   3 1205.43 141.543   7
  -2 -10  -3 1194.70 181.413   1
   2  10   3 1255.65 159.855   2
  -2  10  -3 1862.63 230.178   2
   2 -10   3 1699.78 218.785   1
   2  10   3 1255.93 150.067   8
   2 -10   4 116.929 65.6452   1
   2  10   4 155.036 59.8103   2
  -2  10  -4 232.426 76.6510   2
   2  10   4 118.559 57.1945   7
  -2 -10  -4 207.199 73.0102   1
   2  10   4 149.069 45.7401   8
   2 -10   5 859.698 159.811   1
  -2 -10  -5 711.933 146.266   1
   2  10   5 687.543 100.780   8
   2  10   5 649.608 119.463   7
  -2  10  -5 942.678 169.108   2
  -2 -10  -6 5264.80 385.896   1
   2 -10   6 6735.53 455.682   1
   2  10   6 5019.03 257.646   8
  -2  10  -6 6414.45 438.118   2
   2  10   6 5307.35 339.517   7
   2 -10   7 7114.21 481.690   1
  -2 -10  -7 6534.49 436.849   1
  -2  10  -7 7424.91 478.279   2
   2  10   7 6368.77 262.017   8
   2  10   7 6251.00 379.903   7
  -2  10  -8 206.137 90.9291   2
   2  10   8 197.120 77.1938   7
  -2 -10  -8 182.264 77.6215   1
   2 -10   8 235.296 99.3205   1
   2 -10   9-21.2031 54.6645   1
   2  10   9 72.6013 54.7196   4
  -2 -10  -9 137.538 68.0964   1
  -2  10  -9 61.3665 66.7431   2
   2  10   9 26.3423 35.9777   7
   2 -10  10 40.6698 36.5007   1
  -2 -10 -10-0.98726 47.0860   1
   2  10  10 17.0410 37.5064   7
  -2  10 -10 53.2261 41.4936   2
   2  10  10 49.3273 47.3971   4
  -2 -10 -11 1021.10 177.511   1
  -2 -10 -11 919.404 174.712   3
   2  10  11 860.194 167.574   4
   2 -10  11 907.217 183.896   1
  -2  10 -11 999.388 186.094   2
   2  10  11 888.261 161.604   7
  -2 -10 -12 32.0302 44.6211   1
   2 -10  12 109.063 72.9601   1
   2  10  12 55.5542 50.1815   7
   2  10  12 35.5094 41.8517   4
  -2 -10 -12 59.3861 45.5378   3
  -2  10 -12 63.4397 47.1397   2
   2  10  13 87.2911 56.9778   7
   2 -10  13 361.184 124.642   1
   2  10  13 392.359 112.816   4
  -2 -10 -13 370.532 112.059   1
  -2 -10 -13 416.304 129.239   3
  -2  10 -13 540.722 148.311   2
  -2 -10 -14 417.945 124.594   1
  -2 -10 -14 705.438 166.290   3
   2  10  14 414.849 119.718   7
   2 -10  14 783.453 179.394   1
   2  10  14 396.917 117.987   4
  -2  10 -14 610.370 145.323   2
  -2 -10 -15 55.6654 55.5540   3
   2  10  15 163.661 77.4306   4
   2  10  15 228.438 106.504   7
  -2 -10 -15 118.162 65.0676   1
   2 -10  15 38.1693 72.9251   1
  -2  10 -15 243.026 102.475   2
   2  10  16 39.1593 51.2119   4
  -2 -10 -16 57.6008 44.3931   1
   2 -10  16-52.3103 54.1793   5
  -2  10 -16 118.971 85.9304   2
   2  10  16 10.3423 40.6114   7
   2 -10  16 48.4932 80.2898   1
  -2 -10 -16 7.37766 51.1785   3
   2  10  17 1267.43 221.533   7
   2 -10  17 1398.90 259.178   1
  -2 -10 -17 1618.75 220.054   6
   2  10  17 1348.56 220.887   4
   2  10  18 254.233 113.245   4
   2  10  19 66.0439 63.8243   4
   2  11 -18 77.5643 63.7443   2
   2  11 -17 79.7307 63.5757   2
   2  11 -16 1.41856 47.3055   2
   2 -11 -16 97.0922 66.6406   1
  -2  11  16 73.0107 49.6734   4
  -2 -11  15 389.571 134.920   1
   2  11 -15 342.863 109.314   2
   2 -11 -15 267.632 98.4832   1
  -2  11  15 207.509 106.124   4
  -2 -11  14 25.9486 69.7798   1
   2 -11 -14 36.9748 56.8383   1
   2  11 -14-33.0448 52.6295   2
  -2  11  14 29.6992 61.2757   4
   2  11 -13-26.7744 46.0372   2
  -2 -11  13 73.1046 71.1638   1
   2 -11 -13 153.084 87.0551   1
  -2  11  13 37.1350 40.3035   4
   2 -11 -12 428.262 125.958   1
  -2 -11  12 112.765 57.7900   1
  -2  11  12 332.974 125.060   4
   2  11 -12 352.447 108.717   2
   2 -11 -11 41.7185 41.3155   1
  -2  11  11 54.3620 68.0695   4
  -2 -11  11 71.8666 75.1826   1
   2  11 -11 98.3847 63.7419   2
  -2 -11  10 341.441 121.643   1
   2 -11 -10 471.432 125.041   1
  -2  11  10 564.352 148.243   4
   2  11 -10 458.626 116.627   2
   2  11  -9 183.818 66.0022   2
   2 -11  -9 134.993 69.2334   1
  -2 -11   9 226.108 99.1042   1
  -2  11   9 140.533 79.9769   4
  -2  11   8 388.493 125.443   4
   2  11  -8 406.790 104.248   2
   2 -11  -8 309.484 97.7718   1
  -2 -11   8 287.264 113.969   1
  -2  11   7 1414.14 108.358   8
  -2 -11   7 1411.90 226.618   1
   2  11  -7 1653.07 199.015   2
   2 -11  -7 1376.73 199.385   1
  -2  11   7 1720.02 243.135   4
  -2  11   6 180.396 89.4799   4
  -2  11   6 201.159 74.3430   2
  -2 -11   6 477.135 135.478   1
   2  11  -6 254.068 75.9604   2
   2 -11  -6 239.837 92.5793   1
   2 -11  -5 1788.11 225.713   1
  -2  11   5 1657.19 225.314   2
  -2  11   5 1387.32 214.771   4
   2  11  -5 1486.46 183.787   2
  -2 -11   5 1598.68 241.793   1
  -2 -11   4 525.311 140.381   1
   2  11  -4 511.802 124.187   8
   2  11  -4 483.326 109.039   2
   2 -11  -4 282.341 99.8128   1
  -2  11   4 284.269 88.3696   2
  -2 -11   3 693.002 156.471   1
  -2  11   3 670.779 145.808   2
   2  11  -3 673.966 129.056   2
   2  11  -3 605.498 125.620   8
   2 -11  -3 878.492 158.230   1
  -2 -11   2 130.406 71.4928   1
   2  11  -2 35.3377 17.7469   7
   2  11  -2 84.6339 58.7021   8
   2  11  -2 8.10415 41.7776   2
   2 -11  -2 55.9904 29.2325   1
  -2  11   2 24.7669 36.3104   2
   2 -11  -1 40.2303 45.7839   1
   2  11  -1 13.4817 17.6553   7
  -2 -11   1 44.0982 56.1455   1
   2  11  -1 15.1475 29.0855   8
   2  11  -1 6.25635 37.7319   2
  -2  11   1-72.4225 71.1516   2
  -2  11   1 21.4438 19.5040   7
  -2  11   0 553.910 56.0801   7
   2 -11   0 611.863 132.528   1
   2  11   0 1005.44 150.791   8
   2  11   0 776.768 128.781   2
  -2  11   0 566.997 52.9576   7
  -2 -11   0 948.102 176.506   1
  -2  11   0 813.798 155.348   2
   2  11   0 965.730 113.679   7
   2 -11   1 191.594 77.3863   1
   2  11   1 62.0634 35.8312   2
   2  11   1 113.405 46.7185   7
  -2 -11  -1 50.4809 38.7659   1
   2  11   1 115.794 58.3834   8
  -2  11  -1 137.184 62.8008   2
  -2 -11  -2 46.5546 51.0561   1
   2  11   2 11.9396 23.9439   2
   2  11   2 56.0828 26.4328   7
  -2  11  -2 2.69846 46.3559   2
   2 -11   2 15.5587 34.8108   1
   2  11   2 74.1674 44.9170   8
   2  11   3 1152.55 143.653   7
  -2  11  -3 1567.46 218.443   2
   2  11   3 1272.35 168.722   2
   2  11   3 1188.76 152.968   8
  -2 -11  -3 1182.44 191.518   1
   2 -11   3 1376.82 209.421   1
   2  11   4 428.310 101.263   2
   2 -11   4 666.697 150.331   1
  -2 -11  -4 303.820 100.375   1
   2  11   4 458.845 83.8148   8
  -2  11  -4 512.944 131.666   2
   2  11   4 292.023 72.8870   7
   2  11   5 1282.45 164.406   7
  -2  11  -5 1110.21 189.165   2
   2  11   5 1135.10 163.936   2
   2  11   5 1398.51 148.299   8
   2 -11   5 1131.69 192.928   1
  -2 -11  -5 1667.91 226.434   1
   2  11   6 38.5943 29.5630   8
  -2  11  -6 95.5532 61.5476   2
   2  11   6-11.1840 43.1606   7
  -2 -11  -6 55.8511 54.7481   1
   2 -11   6 66.9015 63.9871   1
   2  11   7 2572.57 248.794   7
  -2 -11  -7 2967.24 309.731   1
   2  11   7 2591.50 168.932   8
  -2  11  -7 2923.52 314.903   2
   2 -11   7 3056.05 330.322   1
  -2  11  -8 813.066 169.799   2
   2 -11   8 913.719 184.081   1
   2  11   8 737.081 139.527   7
  -2 -11  -8 1057.72 186.598   1
   2  11   8 894.263 86.1372   8
   2  11   9 1235.03 187.095   7
   2 -11   9 1625.76 252.571   1
  -2 -11  -9 1412.50 218.765   1
  -2  11  -9 1821.47 254.472   2
   2 -11  10 82.6561 77.4615   1
  -2 -11 -10-56.8516 56.1593   1
   2  11  10 55.4478 43.0405   7
  -2  11 -10 71.9414 70.7645   2
   2  11  11 24.2611 46.5064   7
  -2 -11 -11-52.6742 55.5790   1
  -2  11 -11-3.34309 38.2150   2
   2 -11  11 36.6958 63.0859   1
   2  11  11 35.3123 39.2832   4
  -2 -11 -12 37.3630 47.4015   1
   2  11  12 92.0116 66.0504   4
  -2  11 -12-7.17221 45.4411   2
   2 -11  12 47.2796 55.3170   1
   2  11  12-33.4434 55.2575   7
   2  11  13 144.125 86.5039   7
   2  11  13 92.2555 88.3100   4
  -2  11 -13 118.905 71.9243   2
  -2 -11 -13 146.867 76.6474   1
   2 -11  13 287.751 116.471   1
   2  11  14 1090.89 201.270   7
   2  11  14 966.782 185.963   4
  -2 -11 -14 1054.87 200.863   1
   2 -11  14 968.278 212.612   1
  -2  11 -14 1222.70 222.297   2
  -2 -11 -14 937.803 198.345   3
  -2  11 -15 130.274 67.1861   2
   2  11  15 17.1922 50.0015   7
   2  11  15 27.5242 40.0396   4
   2  11  16 134.296 74.0314   7
   2  11  16 62.7534 70.5371   4
   2  11  17-10.4686 45.3066   4
   2  11  18 77.0020 82.8638   4
   2  12 -16 224.563 96.8457   2
   2  12 -15 77.1783 66.0817   2
   2 -12 -14 49.1014 66.4439   1
   2  12 -14-28.0137 38.2589   2
   2  12 -13 81.6944 49.7995   2
   2 -12 -13-10.0369 34.7333   1
  -2 -12  13-26.6298 85.0230   1
  -2  12  13 113.901 87.6375   4
   2  12 -12-39.8894 42.0742   2
   2 -12 -12 129.703 76.6584   1
  -2 -12  12 101.584 72.0796   1
  -2  12  12 1.37830 44.4001   4
   2  12 -11 207.000 89.1782   2
  -2 -12  11 125.891 90.5826   1
   2 -12 -11 360.879 114.534   1
  -2  12  11 330.746 109.908   4
  -2 -12  10 63.2532 79.8565   1
   2  12 -10 86.3599 57.0733   2
  -2  12  10 15.3356 48.0209   4
   2 -12 -10 7.56527 60.8763   1
   2  12  -9 285.744 90.9299   2
  -2  12   9 223.011 93.9142   4
   2 -12  -9 462.698 122.068   1
  -2 -12   9 426.195 140.643   1
   2 -12  -8 144.624 62.7237   1
   2  12  -8 109.627 60.6990   2
  -2 -12   8 74.4211 58.4292   1
  -2  12   8 62.2687 50.9524   4
   2 -12  -7 585.779 140.953   1
  -2  12   7 723.973 173.889   4
  -2  12   7 497.192 135.094   2
   2  12  -7 604.130 127.591   2
  -2 -12   7 719.161 170.175   1
  -2 -12   6 1551.92 253.017   1
  -2  12   6 1319.66 219.591   2
  -2  12   6 1202.39 208.392   4
   2  12  -6 1241.79 182.201   2
   2 -12  -6 1158.98 197.336   1
  -2  12   5-19.2302 51.4557   2
  -2 -12   5 39.2512 50.8064   1
   2  12  -5-6.35819 50.8197   8
   2  12  -5 22.9004 35.3648   2
  -2  12   4 47.7897 51.1990   2
   2 -12  -4 6.25749 42.3276   1
   2  12  -4 39.8905 46.6839   8
  -2 -12   4 193.125 91.7491   1
   2  12  -4 62.0676 50.5084   2
  -2  12   3 121.137 40.3106   7
  -2  12   3 128.350 74.5422   2
   2  12  -3 205.622 75.0488   2
  -2 -12   3 202.752 110.011   1
   2  12  -3 148.046 67.9270   8
   2 -12  -3 132.727 69.7155   1
   2 -12  -2 66.5716 63.5092   1
  -2 -12   2-22.1122 65.3164   1
   2  12  -2 48.8238 35.8322   8
  -2  12   2 70.4555 71.6970   2
   2  12  -2-110.648 56.5806   2
  -2  12   2 54.2504 26.7096   7
  -2 -12   1 481.745 131.919   1
   2  12  -1 512.063 117.264   8
   2 -12  -1 569.101 140.400   1
  -2  12   1 379.293 49.7405   7
   2  12  -1 422.223 71.8387   7
   2  12  -1 447.864 103.249   2
  -2  12   1 498.316 129.836   2
   2  12   0 88.4891 39.5923   8
  -2  12   0 59.7628 35.3282   2
   2 -12   0-63.4492 52.1145   1
  -2 -12   0 141.521 82.9891   1
   2  12   0 142.064 44.6106   7
   2  12   0 122.683 61.3294   2
   2 -12   1 799.859 167.636   1
   2  12   1 780.837 136.649   8
  -2  12  -1 755.315 156.283   2
   2  12   1 821.250 110.401   7
   2  12   1 718.427 130.721   2
  -2 -12  -1 785.232 169.140   1
   2  12   2 42.7464 32.8669   7
   2  12   2 80.4648 52.7043   8
   2 -12   2-18.6404 63.8545   1
   2  12   2 41.3801 26.1845   2
  -2  12  -2 52.8488 51.8415   2
  -2 -12  -2-20.3849 51.0364   1
   2  12   3 310.410 80.7871   8
   2  12   3 183.499 67.0297   2
   2 -12   3 359.069 113.775   1
  -2  12  -3 389.330 105.374   2
   2  12   3 266.406 74.8306   7
  -2 -12  -3 276.090 104.432   1
   2  12   4 881.188 132.918   7
  -2  12  -4 883.688 175.595   2
   2 -12   4 1133.44 201.852   1
   2  12   4 880.817 129.660   8
  -2 -12  -4 806.526 167.608   1
   2  12   4 921.393 153.563   2
   2 -12   5 71.7016 56.5392   1
  -2 -12  -5 200.072 81.7934   1
   2  12   5 47.0143 38.5688   7
   2  12   5 142.582 65.0945   2
   2  12   5 102.670 43.2936   8
  -2  12  -5 84.2552 34.7551   2
  -2  12  -6 43.4716 56.1798   2
   2  12   6 69.2353 38.9630   8
   2  12   6 19.0314 30.3819   2
  -2 -12  -6-2.31886 38.3090   1
   2 -12   6 45.6315 45.0013   1
   2  12   6 21.4633 33.0970   7
  -2  12  -7 152.915 74.9328   2
   2  12   7-3.12963 47.0904   2
  -2 -12  -7 39.5995 48.2041   1
   2 -12   7 78.0786 47.4251   1
   2  12   7 29.7318 32.2635   7
  -2 -12  -8 323.392 118.826   1
  -2  12  -8 180.924 84.3362   2
   2  12   8 188.776 79.0298   7
   2 -12   8 256.964 126.883   1
   2  12   9 3039.29 297.948   7
  -2 -12  -9 3604.94 369.112   1
  -2  12  -9 3014.48 335.566   2
   2 -12   9 2744.50 336.471   1
   2  12  10 2313.52 271.455   7
  -2 -12 -10 2854.82 336.464   1
   2 -12  10 2213.15 309.382   1
  -2  12 -10 2257.69 304.353   2
   2  12  11 649.816 154.873   7
  -2 -12 -11 970.879 196.728   1
   2 -12  11 530.025 163.203   1
  -2  12 -11 536.245 143.940   2
  -2  12 -12 728.517 172.147   2
   2  12  12 750.947 159.073   7
   2 -12  12 697.306 187.342   1
  -2 -12 -12 899.114 190.231   1
  -2  12 -13 309.045 122.132   2
   2 -12  13 306.510 128.522   1
   2  12  13 463.429 131.458   7
   2  12  14 242.236 109.778   7
   2  12  15 170.769 99.3664   7
   2  12  15 179.880 82.4459   4
   2  13 -15 481.563 133.056   2
   2  13 -14 1176.29 204.736   2
   2  13 -13 933.547 183.785   2
   2 -13 -12-40.7524 52.5980   1
   2  13 -12-22.3955 53.2151   2
   2 -13 -11 375.550 121.487   1
   2  13 -11 203.861 78.2890   2
  -2 -13  10 636.385 178.483   1
   2  13 -10 549.549 145.600   2
   2 -13 -10 546.937 144.793   1
  -2  13  10 619.290 164.654   4
  -2  13   9 456.712 144.181   2
  -2  13   9 528.027 155.909   4
   2 -13  -9 431.839 131.887   1
   2  13  -9 497.174 122.346   2
  -2 -13   9 607.118 165.563   1
  -2  13   8 57.1262 64.1536   2
   2  13  -8 130.447 76.8238   2
  -2  13   8 86.4225 82.2695   4
   2 -13  -8 79.7699 60.7747   1
  -2 -13   8-17.7598 44.2570   1
  -2 -13   7 2417.73 331.791   1
   2  13  -7 2446.51 269.369   2
  -2  13   7 3000.29 349.150   2
   2 -13  -7 3023.25 333.831   1
   2  13  -6 547.289 123.709   2
  -2  13   6 514.182 151.453   2
  -2 -13   6 573.502 166.523   1
   2 -13  -6 536.078 142.628   1
   2  13  -6 477.377 131.998   8
   2 -13  -5 302.750 108.127   1
  -2 -13   5 526.038 154.675   1
   2  13  -5 595.932 133.424   2
  -2  13   5 462.429 137.509   2
   2  13  -5 492.892 134.379   8
  -2  13   4 2113.30 286.422   2
   2  13  -4 2007.40 256.000   8
   2  13  -4 1969.99 233.762   2
   2 -13  -4 2114.60 280.073   1
  -2 -13   4 1842.45 284.266   1
   2  13  -3 243.246 96.1424   8
   2  13  -3 291.711 91.3248   2
  -2 -13   3 365.426 125.625   1
  -2  13   3 297.236 106.728   2
   2 -13  -3 358.773 115.699   1
   2 -13  -2 71.9613 64.0789   1
   2  13  -2 36.7763 57.6093   8
  -2 -13   2 69.3353 72.4580   1
  -2  13   2 33.3897 42.0748   2
   2  13  -2 30.1284 28.6592   2
   2 -13  -1 131.553 78.3698   1
   2  13  -1-34.6793 67.8488   2
  -2 -13   1 21.7793 38.5483   1
  -2  13   1-25.2870 41.7201   2
   2  13  -1 26.3279 41.5498   8
   2 -13   0 134.275 80.3665   1
  -2 -13   0 89.1214 78.4123   1
   2  13   0 209.658 86.4785   8
  -2  13   0 38.8244 56.5756   2
   2  13   0 22.4564 38.1451   2
   2 -13   1 6.43657 56.3866   1
  -2  13  -1 52.3583 54.8604   2
   2  13   1 110.296 60.3599   2
  -2 -13  -1 179.080 88.4304   1
   2 -13   2 643.460 162.219   1
  -2 -13  -2 788.439 173.617   1
   2  13   2 678.564 143.204   2
  -2  13  -2 615.928 150.206   2
   2  13   2 687.787 129.159   8
   2  13   3 131.907 61.3548   7
   2  13   3 72.4244 40.9051   8
  -2 -13  -3 230.642 111.554   1
   2  13   3 141.731 70.1489   2
   2 -13   3 85.6400 73.4236   1
  -2  13  -3-14.2101 61.2434   2
   2  13   4 107.400 54.5576   7
   2 -13   4 35.9945 37.7865   1
   2  13   4 58.1935 34.0928   2
   2  13   4 161.539 64.6364   8
  -2 -13  -4 156.105 97.9655   1
   2 -13   5 4589.53 436.679   1
   2  13   5 4201.08 311.314   7
   2  13   5 4117.96 345.977   2
  -2  13  -5 4476.19 415.431   2
  -2 -13  -5 4791.08 439.572   1
   2  13   6 189.893 84.1702   2
   2 -13   6 486.160 143.048   1
   2  13   6 452.698 112.333   7
  -2 -13  -6 317.152 109.384   1
  -2  13  -6 317.641 119.921   2
   2  13   7 1561.78 215.241   2
  -2 -13  -7 1788.10 267.399   1
   2  13   7 1394.28 193.236   7
  -2  13  -7 1692.57 256.736   2
   2 -13   7 1734.05 273.683   1
   2  13   8 121.268 68.1535   7
   2 -13   8 379.720 134.901   1
  -2  13  -8 208.181 82.2989   2
  -2 -13  -8 162.835 87.1135   1
   2  13   8 211.580 89.8317   2
   2  13   9 1666.52 222.913   7
  -2  13  -9 2186.65 300.041   2
  -2 -13  -9 2074.82 293.247   1
   2 -13   9 2141.40 313.493   1
   2  13  10 101.586 59.0358   7
  -2  13 -10 40.2011 68.0692   2
   2 -13  10-9.96348 45.1389   1
   2 -13  11 94.7483 67.3567   1
   2  13  11-7.85079 74.4500   7
   2  13  12 175.183 74.6331   7
   2  13  13 240.591 101.464   7
   2  14 -12 1113.14 198.922   2
   2  14 -11 267.887 107.065   2
   2  14 -10 52.5484 51.0587   2
   2  14  -9 137.444 71.3091   2
  -2  14   9-8.03479 72.0897   2
   2  14  -9 112.527 77.4795   8
   2 -14  -8 199.267 88.1941   1
  -2  14   8 174.569 95.8573   2
   2  14  -8 389.469 137.304   8
   2  14  -8 396.283 122.296   2
  -2  14   7 73.6005 59.0761   2
   2  14  -7 36.5813 68.3433   8
   2 -14  -7 66.3606 70.5405   1
   2  14  -7-62.9658 50.8448   2
  -2  14   6 1707.74 271.112   2
   2  14  -6 1628.55 245.396   8
   2 -14  -6 1668.02 269.279   1
  -2 -14   6 1809.43 297.384   1
   2  14  -6 1795.52 240.791   2
  -2  14   5 246.266 105.488   2
   2 -14  -5 405.826 132.620   1
  -2 -14   5 257.377 117.245   1
   2  14  -5 249.378 78.8860   2
   2  14  -5 344.813 113.731   8
   2  14  -4 162.294 104.790   8
  -2 -14   4 44.2689 95.7454   1
  -2  14   4 71.3733 63.2134   2
   2  14  -4 246.702 101.956   2
   2 -14  -4 103.116 93.8617   1
   2  14  -3 150.007 82.2891   8
  -2 -14   3 137.393 84.6255   1
  -2  14   3 98.2225 87.6835   2
   2  14  -3 106.279 53.2837   2
   2 -14  -3 95.1980 60.1363   1
   2 -14  -2 158.129 100.248   1
  -2 -14   2 126.992 75.2663   1
   2  14  -2 170.927 94.7556   8
  -2  14   2 91.2950 42.4031   2
   2  14  -2 199.410 67.2594   2
   2  14  -1 1612.38 216.906   2
   2  14  -1 1641.17 224.843   8
  -2  14   1 1611.83 250.678   2
   2 -14  -1 1655.61 259.029   1
  -2 -14   1 1713.11 280.731   1
  -2 -14   0 83.0519 74.9752   1
   2 -14   0-29.8308 82.6523   1
   2  14   0 66.0357 49.8173   2
  -2  14   0 116.200 81.6581   2
   2  14   0 53.4307 63.7960   8
  -2  14  -1 35.7306 55.3000   2
  -2 -14  -1-50.0874 73.2187   1
   2 -14   1-52.5121 90.5431   1
   2  14   1-28.8006 50.0655   2
   2  14   1-11.7785 35.9147   8
  -2  14  -2 36.0771 42.9000   2
  -2 -14  -2-70.4361 61.8548   1
   2  14   2-64.6232 54.1855   2
   2  14   3 450.316 125.603   2
  -2 -14  -3 385.589 135.281   1
  -2  14  -3 330.353 109.004   2
   2 -14   3 374.695 131.962   1
   2  14   4 116.879 79.5235   2
   2 -14   4-56.1539 59.6344   1
  -2  14  -4 183.550 121.184   2
  -2 -14  -4 126.499 98.4061   1
   2 -14   5 290.711 107.312   1
   2  14   5 238.661 81.8555   2
  -2  14  -5 466.693 140.264   2
   2 -14   6 51.7430 54.2416   1
  -2  14  -6 91.1802 64.5724   2
   2  14   6 209.493 81.8340   2
  -2  14  -7 559.930 146.303   2
   2  14   7 593.025 140.257   2
   2 -14   7 703.174 178.990   1
   2  14   8-5.80276 37.4112   2
   2 -14   8 82.3733 83.4589   1
   2  14   9 300.723 107.666   2
   2  14  10 72.5463 68.3881   2
   2  15  -7 308.773 114.956   8
   2  15  -7 293.286 116.688   2
   2  15  -6 926.136 171.717   2
   2  15  -6 875.218 191.308   8
   2  15  -5 221.182 86.9607   2
   2  15  -5 171.405 89.5503   8
   2  15  -4 595.263 137.889   2
   2  15  -4 436.531 123.156   8
   2  15  -3 1061.49 193.073   8
   2  15  -3 1038.22 182.211   2
  -2  15   2 258.304 100.432   2
   2  15  -2 101.037 67.9520   8
   2  15  -2 161.744 60.8821   2
   2  15  -1 117.115 58.8763   2
   2  15  -1 58.2812 46.8875   8
  -2  15   0 1168.55 224.647   2
   2  15   0 751.687 157.515   2
   2  15   1 20.5962 33.2012   2
   2  15   2 147.721 76.3023   2
   3   0 -25 5.69153 54.7978   3
   3   0 -24 657.206 145.958   3
  -3   0  24 874.908 200.507   4
   3   0 -23-54.0670 52.3161   3
  -3   0  23-30.8209 60.6212   4
   3   0 -23-2.08071 29.6837   8
   3   0 -22 207.540 79.9842   3
  -3   0  22 261.762 107.502   4
   3   0 -22 318.175 98.0544   8
   3   0 -21 37.1535 34.4292   8
   3   0 -21 1.74861 36.3017   3
   3   0 -20 2344.49 242.581   8
  -3   0  20 2603.32 306.736   4
   3   0 -20 2661.88 258.341   3
   3   0 -19 22.8233 35.8498   3
   3   0 -19 28.6588 35.5007   8
  -3   0  19-11.9239 49.1814   4
   3   0 -18 184.899 68.3718   3
   3   0 -18 208.045 71.2336   8
  -3   0  18 173.289 81.3239   4
   3   0 -17 1.02350 46.4831   8
   3   0 -17 14.1104 32.1584   3
  -3   0  17 3.43735 41.2264   4
   3   0 -16 7551.35 393.533   8
  -3   0  16 7822.37 484.182   4
  -3   0  16 7559.97 247.364   6
   3   0 -16 7864.68 389.829   3
   3   0 -15 10.1254 45.8887   1
  -3   0  15-4.73566 39.0612   4
  -3   0  15 0.10503 13.7831   6
   3   0 -15 45.4182 29.2808   3
  -3   0  15 24.0250 27.6160   2
   3   0 -15 16.8946 37.7325   8
  -3   0  14 92.3984 25.9688   6
   3   0 -14 50.4886 38.5993   3
  -3   0  14 144.721 62.6818   2
   3   0 -14 7.06149 25.4446   8
   3   0 -14 94.2163 58.5503   1
  -3   0  14 90.6007 64.3793   4
  -3   0  13-2.54383 28.9103   2
  -3   0  13 8.99999 12.8273   6
  -3   0  13 38.5343 31.6028   4
   3   0 -13-18.8556 22.5731   3
   3   0 -13-12.9410 30.0717   8
  -3   0  12 222.040 64.4114   2
  -3   0  12 186.138 29.8006   6
   3   0 -12 199.816 58.2963   8
   3   0 -12 144.923 60.3561   1
  -3   0  12 166.760 36.9650   5
   3   0 -11 38.0429 33.3231   8
  -3   0  11-2.02097 14.4429   5
  -3   0  11 13.4600 11.6606   6
   3   0 -11 25.7834 27.9657   1
  -3   0  11-14.3341 29.7558   2
  -3   0  10 570.130 69.7791   5
   3   0 -10 631.358 101.473   1
   3   0 -10 596.619 79.2153   3
  -3   0  10 708.854 50.5420   6
   3   0 -10 621.754 92.8190   8
  -3   0  10 780.696 104.968   2
   3   0  -9 56.3074 26.7418   3
  -3   0   9 30.8498 19.2299   5
   3   0  -9 60.6183 34.9668   8
   3   0  -9 50.1651 34.4234   1
   3   0  -8 5042.72 217.286   5
   3   0  -8 5409.52 267.892   1
  -3   0   8 5216.03 219.179   5
   3   0  -8 5377.05 258.211   8
   3   0  -8 5414.17 206.288   3
   3   0  -7 3.89326 23.0052   8
  -3   0   7 25.7975 17.8453   5
   3   0  -7 22.7826 17.5366   3
   3   0  -7 15.3210 22.0676   5
   3   0  -7-13.3600 24.3414   1
   3   0  -6 946.138 99.5928   1
   3   0  -6 819.713 68.9232   3
  -3   0   6 870.520 93.1661   5
   3   0  -6 886.340 100.169   5
   3   0  -6 999.550 111.318   8
  -3   0   6 810.375 100.713   8
  -3   0   5-12.5363 29.3819   4
   3   0  -5 5.23913 10.9728   3
   3   0  -5-8.04360 20.9411   5
  -3   0   5-1.46800 18.4922   8
  -3   0   5-4.74481 13.9449   1
   3   0  -5 19.8598 22.1155   8
  -3   0   5 11.3096 20.3163   5
   3   0  -5 27.0840 20.4118   1
   3   0  -4 1054.27 51.6231   3
   3   0  -4 1077.16 100.358   5
  -3   0   4 1076.94 101.986   4
  -3   0   4 1086.08 81.9538   1
   3   0  -4 1022.82 78.1842   1
   3   0  -4 1072.20 100.801   8
  -3   0   4 980.564 96.4461   8
   3   0  -3 39.0670 17.0226   1
  -3   0   3 30.8203 13.4367   1
  -3   0   3 29.8056 24.8922   4
   3   0  -3 11.8717 22.3529   8
   3   0  -3 8.14039 17.6027   5
   3   0  -2 4409.95 202.405   5
  -3   0   2 4640.21 126.663   1
   3   0  -2 4563.03 204.163   8
   3   0  -2 4456.54 122.504   1
  -3   0   2 4330.49 181.221   4
   3   0  -1 8.39728 22.3419   7
  -3   0   1 41.3251 19.0762   4
   3   0  -1 24.1779 22.4269   8
  -3   0   1 55.4252 22.4392   6
   3   0  -1 49.4183 23.9477   5
   3   0   0 5122.07 212.734   8
  -3   0   0 5138.98 152.220   4
  -3   0   0 5159.25 122.716   3
   3   0   0 4868.96 222.285   7
  -3   0   0 5019.74 192.507   6
   3   0   0 5055.98 217.860   5
  -3   0   0 5153.95 164.292   2
  -3   0  -1 51.8488 16.0181   3
  -3   0  -1 26.0877 17.3499   6
   3   0   1 60.9178 32.5129   5
   3   0   1 42.2985 17.8554   2
  -3   0  -1 53.4230 11.9203   4
  -3   0  -1 20.1382 12.6416   2
   3   0   1 50.6164 26.7790   7
   3   0   2 400.664 64.7841   7
  -3   0  -2 339.610 46.3365   2
  -3   0  -2 344.887 55.7811   5
   3   0   2 409.049 51.6768   2
   3   0   2 352.772 57.4272   5
  -3   0  -2 400.225 43.8664   3
  -3   0  -2 401.220 60.4163   6
  -3   0  -3 32.9309 30.5686   6
   3   0   3-2.69943 18.5834   5
  -3   0  -3 18.5294 16.6326   3
   3   0   3 18.7769 25.0142   7
   3   0   3 22.0347 20.3347   2
  -3   0  -3 12.5178 13.9921   2
  -3   0  -3 34.0202 29.8051   5
   3   0   4 932.199 89.3167   2
  -3   0  -4 1027.89 91.2157   2
  -3   0  -4 1043.54 88.3130   3
  -3   0  -4 1050.16 96.0274   5
   3   0   4 944.881 93.3879   5
  -3   0  -4 1127.71 107.584   6
   3   0   4 807.515 96.9260   7
  -3   0  -5 37.6598 23.1880   3
   3   0   5 49.9348 28.0818   7
   3   0   5 9.22840 22.7499   5
  -3   0  -5 48.3651 27.0259   6
  -3   0  -5 16.6598 18.7315   2
   3   0   5 24.8110 19.8967   2
  -3   0  -5 22.8455 19.1121   5
  -3   0  -6 28480.8 589.077   5
   3   0   6 25568.6 445.430   4
  -3   0  -6 28719.8 655.602   6
   3   0   6 29001.2 646.457   2
   3   0   6 30978.6 689.669   7
  -3   0  -6 28202.3 631.616   2
  -3   0  -6 29199.3 623.139   3
  -3   0  -6 29339.3 653.944   1
  -3   0  -7 7.40666 21.7420   3
   3   0   7 32.5308 20.9982   7
  -3   0  -7-7.11733 26.0083   6
  -3   0  -7-1.44727 20.5931   1
  -3   0  -7 7.87376 23.8327   2
  -3   0  -7 4.38249 14.7232   5
   3   0   7 15.8279 21.0796   2
   3   0   7 12.4046 13.9885   4
  -3   0  -8 3493.19 217.971   6
   3   0   8 3350.39 215.261   6
  -3   0  -8 3211.53 170.028   5
  -3   0  -8 3320.29 210.355   2
   3   0   8 3383.07 219.153   2
  -3   0  -8 3340.78 225.635   1
   3   0   8 3425.60 149.969   4
  -3   0  -8 3458.21 210.685   3
   3   0   8 3099.19 226.081   7
   3   0   9-1.10955 22.0606   7
   3   0   9 26.4505 19.8305   6
  -3   0  -9 43.4006 22.2450   5
  -3   0  -9-10.0813 31.8247   2
  -3   0  -9-18.4264 28.5660   6
   3   0   9 30.2698 28.7565   2
  -3   0  -9-80.6434 40.8521   1
  -3   0  -9 5.17951 22.2239   3
   3   0   9-1.93579 13.4274   4
  -3   0 -10 2208.64 135.275   5
   3   0  10 2249.51 195.678   7
  -3   0 -10 2190.74 184.808   3
  -3   0 -10 2227.20 184.850   6
   3   0  10 2092.44 139.143   4
   3   0  10 2191.43 194.324   2
  -3   0 -10 2135.79 202.235   1
  -3   0 -10 2157.82 184.296   2
  -3   0 -11 11.8969 29.0741   3
   3   0  11 24.1646 26.4949   7
  -3   0 -11-38.4053 32.1180   2
  -3   0 -11-35.2279 40.2017   6
  -3   0 -11-22.2468 19.3931   5
   3   0  11 4.31153 16.3081   4
  -3   0 -11-20.2233 23.6993   1
   3   0  11 9.52504 31.9860   2
   3   0  12 93.1469 54.4453   7
  -3   0 -12 104.051 48.8417   3
  -3   0 -12 131.119 59.7756   2
   3   0  12 93.2030 35.7115   4
   3   0  12 195.461 71.4658   2
  -3   0 -12 44.6386 29.6737   6
  -3   0 -12 64.7075 44.6340   1
   3   0  13 9.73492 31.5776   2
   3   0  13 9.97088 15.1652   4
   3   0  13 28.9100 44.3540   7
  -3   0 -13-33.2349 40.4029   1
  -3   0 -13 34.7240 38.8430   2
  -3   0 -13 43.7741 40.6002   3
  -3   0 -13-6.55010 34.9578   6
  -3   0 -14 3119.72 290.128   1
   3   0  14 3076.71 274.635   2
   3   0  14 2808.10 251.319   7
  -3   0 -14 2874.32 250.323   3
  -3   0 -14 2912.90 239.602   6
  -3   0 -15 23.5990 40.1459   3
  -3   0 -15-17.7297 27.2365   6
   3   0  15-19.3383 43.1818   7
  -3   0 -16 3148.37 283.683   3
  -3   0 -16 3219.07 265.926   6
   3   0  16 2854.42 228.592   4
   3   0  16 3262.46 285.616   7
   3   0  17-0.31034 22.1955   4
   3   0  17 49.0401 72.5617   7
  -3   0 -17-58.1802 52.1782   3
   3   0  18 176.040 66.2051   4
  -3   0 -18 288.212 86.6267   3
   3   0  18 135.434 84.3240   7
   3   0  19 66.6430 56.9633   7
   3   0  19-22.7575 30.6421   4
  -3   0 -19-55.6321 67.9930   3
   3   0  20 1845.99 245.403   7
  -3   0 -20 2221.56 271.039   3
   3   0  20 1939.41 217.685   4
   3   0  21-12.1138 44.3826   7
   3   0  21-73.3303 52.7767   4
   3   0  22 96.5471 91.5010   7
  -3   0 -22 283.748 103.616   3
   3   0  23-0.95255 48.5179   7
   3   1 -25 766.415 159.163   3
   3  -1 -25 570.880 141.593   3
   3  -1 -24 64.7336 60.6582   3
  -3  -1  24 12.2396 45.0736   4
  -3   1  24 167.076 97.9250   4
   3   1 -24 43.3249 48.1143   8
   3   1 -24-91.0726 67.2356   3
   3   1 -23-54.1858 52.4545   8
   3   1 -23 111.452 70.0493   3
  -3  -1  23 21.4324 51.7393   4
   3  -1 -23-20.8982 55.0932   3
  -3   1  23 44.9100 56.9852   4
   3   1 -22-2.08938 47.0779   3
  -3  -1  22-41.6104 66.7349   4
  -3   1  22 46.4291 55.5830   4
   3   1 -22 149.210 77.4903   8
   3  -1 -22 137.800 68.6755   8
   3  -1 -22 87.4464 63.0502   3
   3   1 -21 300.534 94.5377   3
  -3  -1  21 395.889 127.106   4
   3  -1 -21 274.465 78.9908   8
  -3   1  21 362.926 121.774   4
   3   1 -21 259.741 80.7413   8
   3  -1 -21 285.239 90.8316   3
   3   1 -20 24.6439 58.5042   8
  -3  -1  20-87.2961 70.8003   4
  -3   1  20-132.303 94.7486   4
   3  -1 -20 1.59151 33.6784   8
   3   1 -20-31.9655 46.8376   3
   3  -1 -20 23.2796 40.0192   3
  -3  -1  19 83.4383 32.4912   6
  -3   1  19 58.3591 49.9819   4
   3   1 -19 182.409 67.4395   8
  -3  -1  19 88.3898 67.4662   4
   3  -1 -19 148.205 63.2308   3
   3   1 -19 124.732 52.9333   3
   3  -1 -19 92.8266 44.7429   8
   3  -1 -18 1119.86 158.514   3
  -3  -1  18 1216.22 113.246   6
  -3  -1  18 1221.50 206.126   4
   3   1 -18 1459.40 191.316   8
  -3   1  18 1171.14 199.594   4
   3   1 -18 1409.93 174.552   3
   3  -1 -18 1082.20 145.783   8
   3   1 -17 46.8433 40.3966   8
  -3  -1  17-46.0278 54.8354   4
  -3   1  17-67.1163 66.2004   4
  -3  -1  17-15.4932 23.6506   6
   3   1 -17 18.8940 26.0445   3
   3  -1 -17 29.0948 28.4991   8
   3  -1 -17 42.4397 26.9823   3
   3  -1 -16 302.095 78.4283   3
   3  -1 -16 299.968 79.2356   8
   3   1 -16 174.219 59.3085   3
  -3  -1  16 114.049 63.8268   4
  -3   1  16 350.286 104.042   4
   3   1 -16 246.840 83.4879   8
  -3  -1  16 119.031 32.1408   6
  -3  -1  15 3353.46 172.518   6
   3   1 -15 3391.33 300.613   1
  -3  -1  15 3078.96 147.689   5
  -3  -1  15 3343.79 304.852   4
   3  -1 -15 3236.83 231.143   8
   3  -1 -15 3384.31 246.448   3
   3   1 -15 3197.48 262.456   8
   3  -1 -15 3527.07 303.033   1
  -3  -1  15 3575.98 281.352   2
  -3   1  15 3461.75 280.274   2
   3   1 -15 3017.54 230.343   3
  -3   1  15 3091.95 293.546   4
   3   1 -14 1283.27 176.342   1
  -3  -1  14 1307.60 99.3591   5
   3  -1 -14 1435.25 147.951   8
  -3   1  14 1485.39 173.958   2
  -3  -1  14 1271.61 101.543   6
  -3  -1  14 1289.88 181.497   4
   3  -1 -14 1472.18 188.456   1
  -3   1  14 1521.58 197.348   4
  -3  -1  14 1407.55 172.324   2
   3   1 -14 1499.91 152.500   3
   3  -1 -14 1457.10 153.905   3
   3   1 -14 1479.85 171.579   8
   3   1 -13 306.618 69.1553   3
  -3   1  13 548.642 101.470   2
  -3   1  13 446.927 106.232   4
  -3  -1  13 382.475 53.2709   6
  -3  -1  13 233.820 84.3014   4
   3  -1 -13 447.309 81.4155   8
   3   1 -13 352.017 83.4154   8
   3  -1 -13 525.479 111.063   1
  -3   1  13 550.409 90.5442   3
   3   1 -13 357.644 89.7044   1
   3  -1 -13 445.708 84.2161   3
  -3  -1  13 378.964 55.9867   5
  -3  -1  13 398.768 89.3412   2
  -3  -1  12-3.06411 12.8067   5
   3  -1 -12 45.9164 40.6731   1
  -3  -1  12 8.76375 36.8379   2
   3  -1 -12 53.6772 26.9764   5
  -3   1  12 19.1979 20.7141   3
   3   1 -12 3.34965 34.4414   8
   3  -1 -12 69.6896 36.4387   8
   3   1 -12 52.0699 38.4828   1
  -3  -1  12 24.1329 18.2152   6
  -3   1  11 1575.58 137.556   3
   3   1 -11 1882.64 177.832   8
   3   1 -11 1912.44 188.718   1
   3  -1 -11 1479.25 114.880   5
   3  -1 -11 1591.30 170.249   1
  -3  -1  11 1904.97 169.979   2
   3  -1 -11 1490.81 137.182   8
  -3  -1  11 1821.89 125.749   5
   3   1 -10 1612.51 157.279   8
   3   1 -10 1584.13 126.237   3
   3  -1 -10 1561.23 127.822   3
  -3  -1  10 1652.60 122.721   5
   3   1 -10 1666.37 167.769   1
  -3   1  10 1318.87 118.794   3
  -3  -1  10 1697.52 170.216   1
   3  -1 -10 1407.43 130.065   8
   3  -1 -10 1453.85 155.118   1
  -3  -1  10 1704.32 150.999   2
   3  -1 -10 1294.77 108.334   5
  -3   1   9 290.762 53.7001   3
   3  -1  -9 353.157 58.8355   3
  -3  -1   9 519.290 68.4024   5
  -3  -1   9 458.998 75.9884   2
  -3  -1   9 510.050 86.7921   1
   3  -1  -9 395.613 78.5038   1
   3   1  -9 508.606 90.0590   1
  -3   1   9 433.578 62.9078   5
   3  -1  -9 295.087 58.7353   8
   3   1  -9 430.930 63.6028   3
   3  -1  -9 378.830 60.2948   5
   3   1  -9 543.283 90.4190   8
   3  -1  -8 15956.0 525.568   4
  -3   1   8 15721.1 414.680   5
   3  -1  -8 15373.7 395.667   3
   3  -1  -8 15157.5 411.010   5
   3   1  -8 17662.9 518.669   1
   3  -1  -8 15243.5 474.431   1
  -3  -1   8 17407.4 519.428   1
   3   1  -8 17489.8 403.594   3
  -3  -1   8 17606.9 437.690   5
  -3   1   8 15580.0 394.231   3
  -3  -1   8 17932.8 471.272   2
   3  -1  -8 15298.0 434.020   8
   3   1  -8 17507.5 516.383   8
  -3  -1   7 9347.27 311.574   2
   3  -1  -7 10708.5 290.027   3
   3  -1  -7 10565.3 326.714   5
   3  -1  -7 10728.5 338.484   8
  -3  -1   7 9391.92 311.610   5
   3  -1  -7 10780.9 401.458   4
  -3   1   7 10500.6 324.704   5
   3   1  -7 8913.76 261.943   3
  -3  -1   7 9169.25 347.434   1
   3  -1  -7 10915.1 357.612   1
  -3   1   7 10737.1 289.577   3
   3   1  -7 9028.68 352.998   8
  -3   1   7 10897.2 342.910   8
   3   1  -7 9177.04 347.628   1
   3   1  -6 100.818 34.4195   1
  -3  -1   6 74.5207 32.2266   1
  -3  -1   6 105.399 34.0338   2
   3  -1  -6 137.982 39.1416   8
  -3   1   6 124.606 37.1946   5
  -3   1   6 127.789 28.0211   3
   3  -1  -6 148.229 47.3726   4
  -3  -1   6 68.7821 24.7212   5
   3  -1  -6 116.851 26.8573   3
   3  -1  -6 110.657 35.3447   1
   3   1  -6 60.9422 33.2462   8
   3  -1  -6 92.2437 32.6864   5
  -3   1   6 123.212 39.4810   8
   3   1  -6 78.3570 21.6651   3
  -3   1   5 8379.83 211.173   3
   3  -1  -5 8436.38 214.651   3
  -3   1   5 7587.07 159.241   6
   3  -1  -5 8386.96 288.478   5
   3  -1  -5 8342.69 320.942   4
  -3  -1   5 7746.26 274.329   1
   3  -1  -5 8231.29 278.873   8
   3   1  -5 7651.35 194.138   3
   3  -1  -5 8295.64 260.285   1
  -3  -1   5 7595.85 275.881   5
  -3   1   5 8471.52 285.866   8
   3   1  -5 7650.62 306.401   8
  -3   1   5 8300.25 285.329   5
   3   1  -5 7758.37 274.172   1
  -3   1   4 745.632 48.0661   6
   3  -1  -4 699.210 76.9943   8
   3   1  -4 754.912 88.9143   8
   3   1  -4 776.837 74.4158   1
  -3   1   4 703.409 85.6518   4
   3  -1  -4 693.981 63.3517   1
  -3  -1   4 700.184 72.6032   1
   3  -1  -4 731.660 53.1449   3
   3  -1  -4 665.292 78.8688   5
  -3   1   4 642.122 75.9967   8
   3  -1  -4 726.128 84.0521   4
  -3   1   4 689.853 49.3241   3
   3  -1  -3 6118.02 230.971   8
  -3   1   3 6274.70 148.455   3
  -3   1   3 6096.08 168.878   6
   3  -1  -3 6234.24 240.114   4
  -3  -1   3 6229.81 206.590   1
   3  -1  -3 6262.39 170.437   1
  -3   1   3 6358.48 238.843   8
   3   1  -3 6244.54 201.945   1
   3   1  -3 6358.48 262.527   8
  -3   1   3 6103.33 239.028   4
   3  -1  -3 6248.79 245.698   5
   3  -1  -2 572.284 73.6946   5
  -3   1   2 614.864 73.0528   8
  -3   1   2 630.872 40.9360   3
   3  -1  -2 578.562 64.3833   4
   3  -1  -2 667.129 71.7282   8
  -3   1   2 643.403 69.4816   4
   3   1  -2 355.574 41.5057   1
  -3  -1   2 338.312 42.0639   1
   3   1  -2 354.214 60.7906   8
  -3   1   2 607.970 56.6231   6
   3   1  -2 365.478 65.0686   7
   3  -1  -1 19126.3 390.797   6
   3   1  -1 17543.9 329.249   1
   3  -1  -1 19362.7 402.751   4
   3   1  -1 17762.9 460.952   7
  -3   1   1 19659.7 403.152   4
  -3   1   1 20686.1 397.061   6
   3   1  -1 17857.2 455.181   8
   3   1  -1 17116.7 273.043   3
  -3  -1   1 17555.9 343.897   1
   3  -1  -1 19807.7 468.235   5
  -3  -1   1 18269.6 298.024   2
  -3   1   0 5543.34 211.821   2
   3  -1   0 5201.31 228.331   5
   3  -1   0 5288.62 227.074   7
  -3  -1   0 6923.23 156.265   3
   3  -1   0 5335.29 176.252   4
   3   1   0 6961.46 153.997   3
  -3  -1   0 7058.63 148.010   2
   3   1   0 6898.75 256.221   8
   3   1   0 6974.42 266.427   7
  -3  -1   0 6878.93 177.995   1
  -3  -1  -1 8307.57 202.337   1
  -3   1  -1 7108.93 243.948   6
   3  -1   1 6878.91 266.061   5
   3  -1   1 7168.66 245.568   2
   3   1   1 8571.00 188.740   2
  -3   1  -1 7400.05 246.471   2
   3  -1   1 7210.94 189.458   4
  -3   1  -1 7357.86 185.177   4
   3   1   1 8534.26 284.829   8
  -3   1  -1 6863.44 157.735   1
  -3  -1  -1 8435.04 184.868   2
   3   1   1 8318.58 197.890   3
  -3  -1  -1 8479.08 199.763   3
   3  -1   1 6893.77 260.650   7
   3   1   1 8356.77 294.940   7
  -3   1  -2 32658.3 660.848   5
  -3  -1  -2 34489.9 680.091   5
   3  -1   2 32961.4 669.488   5
   3  -1   2 33427.0 644.199   2
  -3   1  -2 34362.6 658.510   6
  -3   1  -2 32745.7 640.431   2
   3   1   2 35071.8 552.876   2
   3  -1   2 33650.8 508.394   4
  -3   1  -2 33360.3 539.618   1
  -3  -1  -2 34559.8 542.773   2
  -3  -1  -2 34301.5 568.894   3
   3  -1   2 31844.3 666.274   7
   3   1   2 33490.6 563.395   3
   3   1   2 33677.9 696.494   7
  -3   1  -3 397.818 61.4961   6
  -3  -1  -3 402.242 63.7294   6
   3   1   3 369.500 66.7221   7
  -3   1  -3 373.378 59.6685   5
   3  -1   3 360.783 61.0790   7
   3  -1   3 351.456 32.2417   4
   3  -1   3 460.551 67.3685   2
  -3  -1  -3 359.099 45.8672   2
   3   1   3 420.480 51.3714   2
  -3  -1  -3 437.838 53.7313   3
  -3   1  -3 381.949 60.2798   2
  -3  -1  -3 349.328 57.0969   5
   3   1   3 396.980 50.6012   3
  -3   1  -3 387.469 49.0455   1
   3  -1   3 342.036 57.7512   5
  -3  -1  -4 289.828 48.6767   3
  -3   1  -4 120.289 34.3067   3
   3  -1   4 127.257 20.1158   4
   3  -1   4 148.452 43.0848   2
  -3  -1  -4 188.985 44.2404   5
   3  -1   4 103.366 31.8819   5
  -3   1  -4 143.711 37.2983   7
  -3   1  -4 101.669 33.1611   5
   3   1   4 242.990 43.8577   3
  -3  -1  -4 241.316 53.9608   6
  -3   1  -4 140.508 34.1949   1
   3  -1   4 127.735 45.2225   7
   3   1   4 227.632 40.6720   2
  -3   1  -4 169.677 47.5237   2
  -3   1  -4 166.577 43.0808   6
  -3  -1  -4 256.968 43.6056   2
   3   1   4 174.267 40.5085   7
   3   1   5 22710.4 588.393   7
  -3  -1  -5 23292.3 507.677   2
  -3   1  -5 23646.7 549.845   7
  -3  -1  -5 23738.4 555.416   8
  -3  -1  -5 24021.4 579.551   6
  -3  -1  -5 23396.7 533.507   5
   3  -1   5 23260.8 528.182   5
  -3   1  -5 22420.6 516.720   5
   3  -1   5 23531.2 558.037   7
   3  -1   5 23476.6 567.212   2
  -3   1  -5 23514.8 568.600   6
  -3   1  -5 22849.6 534.868   1
   3   1   5 22040.0 363.749   4
   3   1   5 23844.6 525.098   2
  -3   1  -5 23137.7 558.214   2
  -3   1  -5 23601.2 533.406   3
   3   1   5 24106.9 528.412   3
  -3  -1  -5 24026.3 526.931   3
  -3  -1  -6 9839.50 332.019   3
   3   1   6 9992.62 375.520   7
  -3   1  -6 10654.1 324.374   5
   3  -1   6 10624.5 331.488   5
  -3   1  -6 10557.7 363.093   1
  -3   1  -6 10517.9 367.677   2
  -3   1  -6 10691.9 352.911   3
   3   1   6 9752.73 332.385   3
  -3  -1  -6 9583.00 323.252   2
  -3  -1  -6 9412.62 314.925   5
  -3  -1  -6 9722.23 359.842   6
   3  -1   6 10741.5 376.671   2
   3   1   6 9762.70 227.321   4
   3  -1   6 10560.5 364.139   7
   3   1   6 10081.2 338.122   2
  -3   1  -6 10524.5 366.580   6
   3   1   7 1843.71 146.712   3
   3  -1   7 2244.25 176.842   2
  -3   1  -7 2229.34 168.444   6
  -3   1  -7 2308.35 175.532   1
  -3   1  -7 2380.99 173.971   2
  -3  -1  -7 1864.86 131.460   5
   3  -1   7 2299.11 145.312   5
  -3   1  -7 2268.48 141.502   5
   3   1   7 1990.22 168.773   7
   3   1   7 1860.05 100.273   4
  -3  -1  -7 1852.11 146.094   3
  -3   1  -7 2277.69 164.511   3
  -3  -1  -7 1890.58 157.624   6
   3  -1   7 2166.93 165.714   7
  -3  -1  -7 1790.61 143.636   2
   3   1   7 1846.27 149.106   2
   3  -1   8 14387.2 464.623   7
   3   1   8 13072.3 468.456   7
   3   1   8 13416.4 446.825   2
  -3   1  -8 13974.5 482.503   1
  -3   1  -8 13637.6 373.899   5
   3  -1   8 14148.8 387.236   5
  -3   1  -8 13683.1 453.959   6
  -3   1  -8 13657.8 466.955   2
   3  -1   8 14653.4 490.865   2
   3   1   8 13324.7 332.267   4
   3   1   8 13589.3 442.000   3
  -3  -1  -8 13084.8 431.299   2
  -3   1  -8 14033.8 452.714   3
  -3  -1  -8 13008.5 377.847   5
  -3  -1  -8 13235.6 438.526   3
  -3  -1  -8 13966.4 458.439   6
   3  -1   8 13620.2 461.396   6
  -3  -1  -9 8117.66 352.158   6
   3   1   9 8287.92 269.264   4
   3  -1   9 7961.48 348.294   7
   3   1   9 7929.75 376.248   7
  -3   1  -9 8100.96 352.643   6
   3  -1   9 8052.58 357.650   6
  -3  -1  -9 8332.43 351.724   3
  -3  -1  -9 8129.25 283.016   5
   3   1   9 8600.11 365.384   2
   3  -1   9 7664.34 271.063   4
  -3  -1  -9 8398.38 351.687   2
  -3   1  -9 7922.12 371.710   1
   3  -1   9 7850.27 277.889   5
   3  -1   9 7851.66 371.019   2
   3   1   9 8102.16 349.302   3
  -3   1  -9 8180.42 354.068   3
  -3   1  -9 7781.59 355.022   2
   3  -1  10 415.810 81.9419   6
   3  -1  10 558.563 98.4877   7
  -3   1 -10 512.786 90.6219   3
   3  -1  10 499.435 66.6780   5
  -3  -1 -10 617.361 95.2110   6
   3  -1  10 471.121 69.4498   4
   3  -1  10 420.247 88.6731   2
  -3   1 -10 430.709 88.3324   2
   3   1  10 522.815 68.8509   4
   3   1  10 534.212 100.559   7
   3   1  10 530.185 91.5515   3
  -3   1 -10 513.172 97.6263   1
  -3  -1 -10 504.901 66.6818   5
  -3   1 -10 499.038 92.7762   6
   3   1  10 584.330 100.429   2
  -3  -1 -10 540.874 91.9256   3
  -3   1 -11 1598.43 162.604   6
   3  -1  11 1532.06 161.469   7
  -3  -1 -11 1677.37 165.530   6
  -3   1 -11 1607.73 182.404   1
  -3  -1 -11 1551.58 164.627   3
   3   1  11 1698.71 177.876   2
  -3  -1 -11 1574.72 116.230   5
   3  -1  11 1444.42 128.720   4
   3   1  11 1600.30 181.333   7
   3   1  11 1543.07 128.300   4
  -3   1 -11 1566.19 173.063   2
  -3  -1 -11 1585.01 184.158   1
   3  -1  11 1651.40 181.928   2
  -3   1 -11 1786.73 174.468   3
   3  -1  11 1659.23 168.713   6
  -3   1 -12 270.236 75.6148   2
  -3   1 -12 257.854 69.4192   6
   3  -1  12 294.611 76.8097   7
   3   1  12 250.428 73.1841   7
  -3  -1 -12 250.028 43.9767   5
   3  -1  12 197.433 50.8772   4
  -3   1 -12 257.231 80.0581   1
   3  -1  12 233.071 70.9542   2
  -3  -1 -12 206.979 66.1694   1
  -3   1 -12 195.971 65.6228   3
   3   1  12 269.102 56.0931   4
  -3  -1 -12 262.153 72.7874   6
  -3  -1 -12 383.649 88.6969   3
   3   1  12 360.155 84.9874   2
   3  -1  12 156.113 58.0147   6
  -3   1 -13 83.9048 49.9319   6
   3  -1  13 59.8465 47.5488   7
   3  -1  13 137.181 52.3937   6
   3   1  13 69.5034 38.8064   4
  -3  -1 -13 165.351 66.3803   3
  -3  -1 -13 178.442 64.8051   6
  -3  -1 -13 88.5736 25.4926   5
  -3   1 -13 63.1438 43.7966   2
  -3   1 -13 75.6929 42.1283   1
   3  -1  13 84.5802 38.7891   4
   3   1  13 84.6081 64.4618   7
  -3  -1 -13 137.005 61.6340   1
   3  -1  13 128.118 62.9314   2
   3   1  13 137.222 56.4552   2
  -3   1 -13 109.483 50.7068   3
  -3  -1 -14 2899.65 236.864   6
   3   1  14 3110.14 269.292   2
  -3   1 -14 2764.20 251.738   2
  -3  -1 -14 2959.87 138.622   5
  -3   1 -14 2623.88 264.789   1
  -3  -1 -14 3009.39 291.205   1
  -3   1 -14 2848.44 251.950   3
   3  -1  14 2416.66 231.574   7
   3  -1  14 2700.40 234.567   6
   3   1  14 2843.26 261.205   7
  -3  -1 -14 3103.14 261.455   3
  -3   1 -15 1016.36 162.911   2
   3   1  15 1175.38 170.616   7
  -3   1 -15 1204.37 170.182   3
  -3  -1 -15 991.906 152.714   3
  -3  -1 -15 1047.76 148.366   6
   3  -1  15 1101.89 165.893   7
   3  -1  16 731.581 138.002   7
   3   1  16 819.886 146.896   7
  -3  -1 -16 904.262 139.539   6
  -3   1 -16 645.512 125.971   3
  -3   1 -16 829.728 159.442   2
   3   1  16 732.060 114.835   4
   3  -1  16 580.560 106.014   4
  -3  -1 -16 823.044 143.194   3
  -3  -1 -17-18.9115 40.9064   6
   3  -1  17-36.5259 53.3139   7
   3  -1  17-0.63814 25.7851   4
   3   1  17 18.8913 33.5789   4
   3   1  17 78.0817 42.7741   7
  -3  -1 -17-32.1483 51.7954   3
  -3   1 -17-15.7165 34.4057   3
   3  -1  18 316.535 103.217   7
  -3  -1 -18 234.114 83.4737   3
  -3   1 -18 218.772 85.8429   3
   3   1  18 309.769 84.4011   4
   3  -1  18 267.630 77.0040   4
   3   1  18 205.799 94.6732   7
  -3  -1 -18 180.879 65.6296   6
  -3  -1 -19-1.75144 44.9082   3
  -3   1 -19 98.7770 61.4731   3
   3  -1  19 56.6313 33.4999   4
   3   1  19 70.6370 55.5681   7
   3   1  19 82.3142 53.5659   4
   3  -1  19 105.632 65.3359   7
   3   1  20 954.663 186.013   7
  -3  -1 -20 1031.97 186.642   3
   3  -1  20 1244.82 179.427   4
   3   1  20 1069.55 158.889   4
   3  -1  20 1153.42 198.284   7
  -3   1 -20 1347.48 215.135   3
  -3  -1 -21 15.4071 44.3027   3
   3   1  21 81.2580 52.4601   7
  -3   1 -21 30.9416 44.9750   3
   3   1  21 97.0713 62.0727   4
   3  -1  21-1.91105 27.4558   4
   3  -1  21-46.4637 60.1493   7
   3   1  22 1525.40 259.555   7
   3  -1  22 1594.44 255.827   7
  -3   1 -22 1785.91 258.376   3
  -3  -1 -22 2362.31 303.945   3
   3  -1  23 33.3921 51.8949   7
   3   2 -25 176.464 98.0379   8
   3   2 -24 602.130 142.137   3
   3   2 -24 507.514 141.024   8
  -3  -2  24 760.369 193.673   4
  -3   2  24 486.526 156.829   4
   3  -2 -24 390.344 119.944   3
   3   2 -23 528.364 129.339   3
   3  -2 -23 443.613 122.876   3
  -3  -2  23 530.797 160.472   4
  -3   2  23 332.082 128.217   4
   3   2 -23 284.571 103.740   8
   3  -2 -22-1.22181 35.2123   3
  -3  -2  22 64.1882 68.9997   4
  -3   2  22-52.1479 65.5292   4
   3   2 -22 84.1339 69.1107   8
   3   2 -22-25.6135 36.7525   3
   3  -2 -21 61.7378 48.6261   3
  -3  -2  21 42.3999 38.7002   4
  -3   2  21 81.6727 62.9400   4
   3   2 -21 144.985 64.6048   3
   3  -2 -21 99.0742 48.9449   8
   3   2 -21 244.396 92.7006   8
  -3  -2  20 3598.78 367.438   4
   3   2 -20 2920.49 297.198   8
  -3   2  20 2940.62 330.524   4
   3   2 -20 3250.98 287.480   3
   3  -2 -20 2993.35 285.748   3
   3  -2 -20 2855.89 231.346   8
   3   2 -19 317.536 98.3142   3
  -3  -2  19 246.778 61.4770   6
  -3   2  19 536.242 141.554   4
  -3  -2  19 309.879 117.811   4
   3  -2 -19 432.943 103.657   3
   3  -2 -19 428.978 88.1060   8
   3  -2 -18 154.674 61.1909   3
  -3  -2  18 384.510 128.940   4
  -3   2  18 114.570 69.7948   4
   3   2 -18 426.648 94.3540   3
   3  -2 -18 185.512 60.1181   8
  -3  -2  18 506.527 80.2834   6
  -3  -2  17 2087.60 160.270   6
   3  -2 -17 2639.80 205.591   8
  -3  -2  17 1796.93 104.175   5
  -3  -2  17 2255.60 266.167   4
  -3   2  17 2954.79 302.136   4
   3   2 -17 2151.66 209.888   3
   3  -2 -17 2603.97 238.953   3
  -3   2  16 737.131 119.933   3
  -3  -2  16 649.431 87.8358   6
  -3  -2  16 525.188 61.5308   5
   3  -2 -16 682.738 117.359   3
  -3   2  16 714.482 145.161   4
   3   2 -16 619.840 106.185   3
  -3  -2  16 740.237 152.602   4
   3  -2 -16 673.772 102.620   8
  -3  -2  15 190.266 62.2664   2
  -3  -2  15 218.527 47.7334   6
   3  -2 -15 78.3154 40.1307   3
   3  -2 -15 107.228 32.4849   5
   3   2 -15 167.437 68.3842   1
  -3  -2  15 146.084 33.1214   5
   3  -2 -15 73.8543 33.9010   8
  -3  -2  15 199.494 79.5048   4
  -3   2  15 50.9596 33.9841   3
  -3   2  15 91.4909 58.9367   4
   3  -2 -15 106.561 55.7749   1
   3   2 -15 171.454 63.6393   3
  -3  -2  14 113.370 57.7211   2
   3   2 -14 39.4158 27.8893   1
   3  -2 -14 82.1927 28.5835   5
   3   2 -14 162.424 53.3826   3
  -3  -2  14 92.8530 32.9525   5
  -3  -2  14 111.674 55.7976   4
  -3   2  14 13.1538 28.4302   4
   3  -2 -14 66.9350 34.9060   3
  -3  -2  14 76.2437 28.0777   6
   3  -2 -14 210.141 73.8278   1
   3  -2 -14 87.4084 39.1641   8
  -3   2  14 81.7270 43.5482   3
   3  -2 -13 204.489 51.3138   8
  -3   2  13 224.089 78.0836   4
   3  -2 -13 274.777 65.2341   3
   3   2 -13 104.909 53.5052   1
   3  -2 -13 183.991 44.3764   5
  -3  -2  13 127.846 37.3090   5
   3   2 -13 134.494 48.1221   3
  -3  -2  13 81.5155 59.1554   4
  -3  -2  13 115.515 53.4772   2
   3  -2 -13 186.460 65.4640   1
  -3   2  13 218.910 55.9172   3
  -3  -2  13 73.3674 51.6142   1
  -3  -2  12 3200.71 265.604   1
   3  -2 -12 2643.94 175.796   8
  -3  -2  12 3530.70 183.702   5
   3   2 -12 3447.39 271.676   1
   3  -2 -12 2853.51 249.720   4
  -3   2  12 2626.72 244.694   4
   3  -2 -12 2674.09 163.162   5
  -3  -2  12 3425.53 241.926   2
   3  -2 -12 2779.27 240.958   1
  -3   2  12 2656.46 191.498   3
  -3  -2  11 157.113 38.8864   5
  -3  -2  11 141.042 56.6432   1
   3   2 -11 151.887 52.9992   8
   3   2 -11 188.054 63.5141   1
   3  -2 -11 101.819 36.4382   5
   3  -2 -11 87.8179 44.3346   4
   3  -2 -11 77.3604 34.1213   8
   3  -2 -11 84.1831 45.7480   1
  -3  -2  11 193.959 57.8079   2
  -3   2  11 57.9758 26.8415   3
   3   2 -10 7304.26 361.672   8
   3  -2 -10 7570.47 303.274   3
   3   2 -10 7298.60 289.778   3
  -3  -2  10 7413.17 281.381   5
   3  -2 -10 7497.33 284.238   5
   3  -2 -10 7190.79 277.116   8
   3  -2 -10 7909.20 370.039   1
  -3  -2  10 7637.57 379.344   1
   3   2 -10 7369.63 374.810   1
   3  -2 -10 7722.76 394.312   4
  -3  -2  10 7498.60 330.948   2
  -3   2  10 7429.71 296.793   3
   3   2  -9 112.761 51.1179   8
  -3  -2   9 43.2131 27.6003   1
  -3  -2   9 110.061 38.7831   2
   3   2  -9 114.416 48.3401   1
   3  -2  -9 164.695 43.8284   5
  -3  -2   9 72.8518 26.0360   5
   3  -2  -9 176.011 42.3330   3
   3  -2  -9 137.642 47.9550   4
   3  -2  -9 163.604 41.3588   8
  -3   2   9 151.775 40.9087   3
   3   2  -9 84.3987 31.1950   3
   3  -2  -8 1945.09 134.754   3
   3   2  -8 1853.56 164.612   1
   3  -2  -8 2008.06 142.694   5
  -3  -2   8 1683.34 130.169   5
   3  -2  -8 1806.44 170.370   4
   3   2  -8 1751.14 162.594   8
  -3  -2   8 1753.10 138.059   2
  -3   2   8 1867.15 128.457   3
   3  -2  -8 1769.46 124.728   8
  -3  -2   8 1506.41 148.488   1
  -3  -2   7 53.3823 24.3511   2
   3  -2  -7-1.78649 19.7831   3
   3   2  -7 33.6936 27.6984   1
   3  -2  -7-8.86481 28.6641   4
  -3  -2   7 11.1664 19.7865   1
   3  -2  -7 24.9622 19.4985   5
  -3  -2   7-7.32518 20.7051   5
  -3   2   7 40.0319 16.0677   3
   3   2  -7 56.3791 40.3568   8
   3  -2  -7 42.1141 19.6468   8
  -3   2   7 44.8399 27.0032   8
   3  -2  -6 2558.52 139.355   3
  -3  -2   6 3070.10 190.297   1
   3   2  -6 3158.22 193.233   1
   3  -2  -6 2618.04 144.470   8
   3   2  -6 3187.80 207.157   8
   3  -2  -6 2541.28 162.047   5
   3  -2  -6 2699.50 192.757   4
  -3   2   6 2543.13 147.924   8
  -3  -2   6 3257.03 160.538   2
  -3   2   6 2620.10 135.527   3
   3   2  -5 4280.02 212.071   1
   3  -2  -5 3639.40 156.986   3
   3  -2  -5 3506.24 101.483   6
  -3   2   5 3533.49 173.576   8
   3   2  -5 4272.55 235.178   8
   3  -2  -5 3621.78 194.904   5
   3  -2  -5 3540.23 209.864   4
  -3  -2   5 4157.96 211.001   1
   3  -2  -5 3667.99 168.825   8
  -3   2   5 3505.42 148.148   3
  -3  -2   5 4108.37 163.789   2
  -3   2   4 966.031 72.1436   3
   3  -2  -4 1035.45 103.841   5
   3  -2  -4 836.356 98.7185   4
   3   2  -4 1405.83 111.342   1
   3  -2  -4 1013.36 75.6354   3
  -3  -2   4 1385.19 112.901   1
  -3   2   4 959.765 104.311   4
   3  -2  -4 977.543 85.3070   8
  -3   2   4 876.979 85.1573   8
   3   2  -4 1382.41 130.846   8
   3  -2  -4 911.726 56.8190   6
  -3  -2   4 1366.48 80.8112   2
  -3  -2   4 1349.45 119.461   7
   3  -2  -3 39334.2 763.916   5
  -3  -2   3 36895.7 701.126   1
  -3   2   3 38682.1 623.506   3
   3   2  -3 38231.4 789.662   8
   3  -2  -3 39512.3 604.738   6
   3  -2  -3 39834.6 760.415   4
  -3   2   3 39870.4 762.289   4
   3   2  -3 37671.8 696.549   1
  -3  -2   3 37906.9 752.208   7
  -3  -2   3 37591.1 561.917   2
  -3   2   3 38437.0 707.441   8
   3  -2  -2 52860.7 930.442   5
  -3   2   2 52926.6 776.140   3
   3  -2  -2 52279.6 703.654   1
  -3  -2   2 48090.5 830.127   1
   3   2  -2 49977.0 915.752   7
   3   2  -2 48222.5 814.834   1
   3  -2  -2 53750.6 896.182   4
   3  -2  -2 48885.1 778.332   6
  -3   2   2 51399.5 884.445   4
   3   2  -2 49317.2 927.377   8
  -3   2   2 52216.0 868.650   8
   3   2  -2 49396.5 730.160   3
  -3  -2   2 50478.8 906.155   7
   3  -2  -1 4936.05 183.852   6
   3   2  -1 5694.55 160.192   3
   3   2  -1 5697.64 192.095   1
   3  -2  -1 5291.90 211.145   4
   3  -2  -1 5044.34 132.604   1
   3   2  -1 5563.56 242.198   7
  -3   2   1 5232.89 204.051   4
  -3  -2   1 5693.77 203.896   1
   3   2  -1 5894.36 250.459   8
  -3   2   1 4999.26 184.298   6
  -3   2   1 5050.15 212.064   8
   3  -2  -1 5358.08 235.987   5
  -3   2   0 781.398 82.8058   7
   3  -2   0 709.919 47.7534   1
  -3   2   0 789.290 75.9324   6
  -3  -2   0 528.832 50.2334   3
   3   2   0 535.381 48.8990   3
   3  -2   0 733.627 87.2209   5
  -3   2   0 703.144 84.1306   2
  -3  -2   0 491.061 57.1759   1
   3   2   0 578.970 77.1194   8
   3  -2   0 722.114 71.0957   4
   3   2   0 507.101 53.5651   1
  -3   2   0 789.423 73.2605   4
   3   2   0 579.113 78.0862   7
  -3   2   0 741.156 43.8088   1
   3  -2   1 886.347 93.4102   2
   3  -2   1 911.089 95.5721   5
   3   2   1 795.177 64.7202   3
  -3   2  -1 848.362 84.7126   6
  -3   2  -1 860.074 91.6134   2
  -3   2  -1 873.371 87.1947   7
   3  -2   1 903.667 75.1893   4
   3   2   1 790.394 41.1050   2
  -3   2  -1 827.443 55.4458   1
   3  -2   1 890.328 88.5643   7
   3  -2   1 856.860 59.1133   1
  -3  -2  -1 814.870 71.5285   1
   3   2   1 901.623 92.7172   8
  -3   2  -1 958.966 73.8384   4
  -3  -2  -1 717.793 63.7431   3
   3   2   1 851.037 94.0679   7
   3   2   2 20764.8 530.794   7
   3  -2   2 21973.4 419.893   1
  -3  -2  -2 21189.6 438.015   3
  -3   2  -2 21930.8 504.627   6
  -3   2  -2 21883.6 416.353   1
  -3  -2  -2 20560.6 440.631   1
   3   2   2 20670.6 499.849   8
  -3   2  -2 21879.7 519.379   5
  -3   2  -2 22698.0 535.042   2
   3   2   2 20834.4 432.158   3
   3  -2   2 22297.8 528.403   2
   3  -2   2 22159.8 526.834   5
   3  -2   2 22564.7 433.443   4
   3   2   2 21501.4 371.856   2
  -3  -2  -2 20920.8 391.934   4
  -3   2  -2 22193.0 491.460   7
   3  -2   2 21950.5 497.877   7
  -3   2  -3 7986.17 270.747   7
  -3   2  -3 7555.90 283.655   6
   3   2   3 7691.43 303.217   7
  -3   2  -3 7702.40 241.555   1
   3  -2   3 8024.93 301.384   2
   3  -2   3 7790.80 289.275   5
   3  -2   3 7546.84 240.580   1
  -3  -2  -3 7478.54 284.268   8
  -3   2  -3 7820.00 298.853   2
   3   2   3 7705.43 213.262   2
  -3  -2  -3 7579.45 197.879   4
   3   2   3 7439.33 272.777   8
   3  -2   3 8015.03 225.794   4
  -3  -2  -3 7213.92 245.605   3
   3  -2   3 7648.07 273.343   7
   3   2   3 7607.81 246.167   3
  -3  -2  -4 3996.90 187.590   3
  -3   2  -4 3740.21 184.060   7
   3   2   4 4189.74 170.172   2
   3  -2   4 3815.16 182.917   1
   3   2   4 4098.75 187.308   3
  -3  -2  -4 3960.45 138.416   4
  -3   2  -4 3819.99 184.161   1
   3  -2   4 3672.10 210.308   2
   3   2   4 4332.50 232.095   7
  -3   2  -4 3899.59 206.185   6
   3  -2   4 3951.75 153.891   4
  -3  -2  -4 4262.75 208.926   8
  -3   2  -4 3945.61 213.738   2
   3  -2   4 3760.09 198.303   5
   3  -2   4 3743.10 189.268   7
  -3   2  -5 15031.6 446.868   6
  -3  -2  -5 15303.8 417.151   3
   3  -2   5 14957.7 423.764   5
   3  -2   5 14966.6 464.410   2
  -3   2  -5 14975.6 407.083   7
   3   2   5 15371.7 388.215   2
  -3  -2  -5 14859.5 321.414   4
   3   2   5 14595.8 472.129   7
  -3   2  -5 15314.0 428.030   1
   3  -2   5 15183.5 419.854   1
  -3   2  -5 15281.1 463.069   2
   3   2   5 15261.5 319.781   4
  -3  -2  -5 15319.1 426.353   8
   3  -2   5 14948.5 419.201   7
   3   2   5 15689.8 417.120   3
  -3  -2  -6 2843.86 172.205   5
   3  -2   6 3074.40 177.005   5
  -3   2  -6 3056.23 196.733   6
   3   2   6 2867.39 174.859   3
  -3  -2  -6 3074.58 201.513   6
  -3  -2  -6 2795.77 175.583   3
  -3  -2  -6 2828.95 132.557   4
   3  -2   6 3005.49 180.685   7
   3   2   6 3034.37 208.785   7
   3  -2   6 3020.08 205.742   2
  -3   2  -6 3257.38 198.075   1
   3   2   6 2947.78 132.300   4
   3   2   6 2830.27 167.390   2
  -3   2  -6 2985.53 199.670   2
  -3  -2  -6 2870.86 175.276   8
   3   2   7 2150.47 184.886   7
  -3   2  -7 2490.50 183.837   6
  -3  -2  -7 2272.34 165.335   3
  -3  -2  -7 2101.58 153.673   8
  -3  -2  -7 2382.24 179.956   6
   3  -2   7 2375.62 170.546   7
  -3   2  -7 2386.24 184.751   2
   3  -2   7 2220.15 151.247   5
   3   2   7 2091.27 156.435   2
  -3  -2  -7 2158.30 123.356   4
  -3  -2  -7 2192.67 152.205   5
   3  -2   7 2451.30 192.771   2
   3   2   7 2049.93 155.951   3
   3   2   7 2194.45 122.322   4
  -3   2  -7 2410.62 179.500   1
   3  -2   8 773.627 99.6170   7
   3   2   8 992.699 114.251   3
  -3  -2  -8 883.758 111.811   6
  -3   2  -8 931.412 117.635   6
  -3  -2  -8 1030.60 118.446   3
   3  -2   8 792.429 88.9436   5
  -3  -2  -8 879.471 84.4521   4
   3  -2   8 723.819 109.756   2
   3   2   8 909.346 84.2636   4
  -3  -2  -8 937.218 104.149   8
  -3   2  -8 775.165 110.595   1
  -3   2  -8 765.280 103.482   3
  -3   2  -8 746.349 109.217   2
   3   2   8 827.141 114.904   7
  -3  -2  -8 903.559 96.2318   5
   3   2   8 809.758 102.314   2
   3   2   9 519.572 100.699   7
   3  -2   9 676.143 101.582   6
  -3   2  -9 687.332 106.602   2
   3   2   9 526.072 85.6255   2
  -3  -2  -9 503.359 71.5202   5
   3   2   9 495.130 82.5612   3
   3  -2   9 678.491 98.6444   7
   3  -2   9 732.053 84.9185   5
   3   2   9 498.146 67.6987   4
  -3  -2  -9 608.709 96.3016   6
  -3   2  -9 802.485 117.136   1
   3  -2   9 719.595 111.906   2
  -3   2  -9 809.639 110.113   3
  -3  -2  -9 524.465 87.1902   3
  -3  -2 -10 119.718 38.9943   5
   3   2  10 82.1197 30.6408   4
   3   2  10 50.0540 34.5288   7
  -3  -2 -10 121.038 43.6415   6
  -3  -2 -10 97.2530 44.9815   3
   3  -2  10 110.501 50.3653   2
   3  -2  10 164.390 41.5880   5
  -3   2 -10 136.948 55.3137   1
  -3   2 -10 117.513 46.9361   3
   3  -2  10 114.758 52.8284   7
   3  -2  10 257.960 69.5018   6
   3   2  10 100.177 42.6612   3
   3   2  10 150.535 49.5512   2
  -3   2 -10 117.367 48.7191   2
   3   2  11 751.691 115.674   3
   3   2  11 813.577 138.152   7
  -3   2 -11 669.325 116.970   2
  -3  -2 -11 855.373 91.8559   5
   3  -2  11 790.437 118.879   6
  -3   2 -11 758.818 118.084   3
  -3  -2 -11 852.618 120.298   6
   3   2  11 913.759 125.175   2
  -3   2 -11 671.505 121.457   1
   3   2  11 786.507 96.2224   4
   3  -2  11 776.683 130.463   2
  -3  -2 -11 796.418 120.398   3
   3  -2  11 665.478 77.9902   5
   3  -2  11 587.773 114.190   7
  -3  -2 -12 97.6014 45.2276   3
  -3   2 -12 33.5935 27.8935   2
   3  -2  12 92.5816 46.5917   6
   3   2  12 78.4157 42.1761   7
   3  -2  12 122.379 44.5002   2
  -3  -2 -12 64.8071 28.7671   5
   3  -2  12 82.3805 36.3217   4
   3  -2  12 65.8721 27.1503   5
  -3   2 -12 91.6073 53.8622   1
  -3   2 -12 120.912 56.1430   3
   3   2  12 71.4090 33.4952   4
  -3  -2 -12 89.7157 51.4771   6
   3  -2  12 59.5679 35.9408   7
   3   2  12 116.604 49.9717   3
   3   2  12 62.6229 40.8748   2
   3  -2  13 751.985 127.241   7
   3   2  13 954.883 150.996   7
  -3   2 -13 957.266 141.816   3
  -3  -2 -13 883.754 127.759   6
   3  -2  13 976.826 140.830   6
  -3  -2 -13 970.030 142.053   3
   3   2  13 976.041 144.491   2
  -3  -2 -13 939.238 91.7254   5
   3  -2  13 934.583 150.884   2
  -3   2 -13 861.923 145.678   1
  -3   2 -13 1031.27 155.625   2
   3   2  13 913.614 138.588   3
   3   2  13 905.557 114.428   4
   3   2  14 697.629 133.424   2
   3  -2  14 532.025 102.968   7
  -3  -2 -14 743.952 131.854   3
  -3   2 -14 565.104 121.048   2
   3  -2  14 644.371 120.809   6
  -3   2 -14 493.582 104.530   3
  -3  -2 -14 534.747 65.1956   5
   3   2  14 705.011 129.338   7
  -3   2 -14 522.513 121.593   1
  -3  -2 -14 445.967 95.8592   6
  -3  -2 -15 53.5652 53.9474   3
  -3   2 -15-20.0904 42.5162   2
  -3  -2 -15 23.1254 36.5182   6
   3  -2  15 40.2570 40.2050   7
  -3   2 -15 105.420 63.7554   3
  -3  -2 -15 51.2852 21.1911   5
   3   2  15 26.0695 37.1210   7
   3  -2  15 84.1343 41.9461   4
  -3  -2 -16 3018.02 281.367   3
  -3  -2 -16 2567.82 115.410   5
  -3  -2 -16 2753.27 242.684   6
  -3   2 -16 2788.64 275.046   2
   3  -2  16 2598.92 225.960   4
   3   2  16 3016.37 289.252   7
   3   2  16 2608.12 219.704   4
  -3   2 -16 2867.03 271.727   3
   3  -2  16 2808.73 263.911   7
   3   2  17 925.361 166.053   7
  -3  -2 -17 839.311 158.600   3
  -3   2 -17 1050.97 174.473   2
   3  -2  17 996.541 145.129   4
  -3   2 -17 1000.24 168.240   3
   3   2  17 776.176 121.589   4
   3  -2  17 988.422 163.762   7
  -3  -2 -17 877.469 141.383   6
  -3   2 -18 141.985 76.5056   2
   3   2  18 14.8269 42.7671   7
  -3  -2 -18 11.1593 37.5593   3
  -3   2 -18 45.9034 32.9431   3
  -3  -2 -18 36.0191 36.3709   6
   3  -2  18 27.9813 31.0032   4
   3  -2  18-18.7613 42.5373   7
   3   2  18-10.9882 48.2557   4
   3  -2  19 268.987 113.720   7
  -3  -2 -19 200.296 71.0361   6
  -3  -2 -19 166.279 78.6023   3
  -3   2 -19 422.783 112.514   3
   3  -2  19 346.040 91.8382   4
   3   2  19 234.226 68.6311   4
   3   2  19 288.325 100.595   7
   3  -2  20 29.5748 60.8489   7
  -3  -2 -20 136.688 87.1170   3
   3  -2  20 2.68199 23.4761   4
   3   2  20-27.9142 45.1747   4
  -3   2 -20 33.2671 38.1542   3
   3   2  20 34.5171 48.5574   7
  -3  -2 -20 65.9983 46.2321   6
   3  -2  21-53.2923 58.0590   7
   3   2  21 97.4599 78.5009   7
  -3  -2 -21 44.0522 45.4008   3
  -3   2 -21 40.6810 47.2431   3
   3  -2  21 137.757 72.7211   4
   3   2  21 64.7022 35.0614   4
   3   2  22 131.520 94.6388   7
   3  -2  22-7.60455 40.0186   7
   3  -2  23 29.9401 54.3486   7
   3  -2  24 646.755 158.795   7
   3   3 -25 384.446 128.916   8
   3   3 -24 1085.52 211.215   8
   3  -3 -24 1108.92 200.696   3
   3   3 -24 803.015 165.279   3
  -3  -3  24 897.972 211.501   4
  -3   3  24 1016.52 221.935   4
   3   3 -23 375.079 109.826   3
   3  -3 -23 311.018 106.757   3
  -3  -3  23 420.085 146.219   4
  -3   3  23 299.014 134.084   4
   3   3 -23 553.046 154.908   8
   3   3 -22 67.5917 44.6702   3
   3  -3 -22 17.5791 46.9488   3
   3   3 -22 208.520 99.8025   8
  -3  -3  22 219.346 109.125   4
  -3   3  22 43.6170 57.6425   4
   3  -3 -21 91.8450 56.7573   3
  -3  -3  21 56.7210 64.4035   4
   3   3 -21 34.7848 50.1889   3
  -3   3  21 103.269 67.8654   4
   3   3 -20 47.8259 45.9761   3
  -3  -3  20 43.0603 57.9925   4
  -3   3  20 76.8878 70.8650   4
   3  -3 -20 70.3072 51.1772   3
   3  -3 -20 22.6253 29.4185   8
  -3  -3  19 242.627 94.8397   4
   3   3 -19 199.119 75.5067   3
   3  -3 -19 44.4608 30.3639   8
   3  -3 -19 113.590 60.1510   3
  -3  -3  19 246.263 66.3251   6
  -3   3  19 58.9710 59.2006   4
  -3  -3  18 3059.69 213.395   6
   3   3 -18 3301.09 276.773   3
   3  -3 -18 3602.36 298.332   3
  -3  -3  18 2975.02 327.011   4
  -3   3  18 3690.96 351.786   4
  -3  -3  18 2764.22 133.475   5
   3  -3 -18 3348.68 212.872   8
   3   3 -17 841.332 135.119   3
   3  -3 -17 405.216 61.6126   5
  -3  -3  17 952.655 115.280   6
  -3  -3  17 875.051 172.203   4
  -3  -3  17 772.356 77.7204   5
  -3   3  17 371.531 106.204   4
   3  -3 -17 316.676 63.6725   8
   3  -3 -17 424.412 101.832   3
  -3  -3  16 2431.33 272.674   4
   3  -3 -16 3015.95 171.238   5
  -3  -3  16 2183.21 265.607   1
  -3   3  16 3109.90 306.094   4
   3   3 -16 2056.28 203.473   3
   3  -3 -16 3154.83 256.839   3
  -3  -3  16 2093.00 138.613   5
   3  -3 -16 2948.63 187.027   8
  -3  -3  16 2234.73 175.429   6
  -3   3  15 1602.39 173.969   3
  -3  -3  15 1326.03 196.610   1
   3  -3 -15 1598.94 128.152   5
  -3  -3  15 1177.95 107.755   5
  -3  -3  15 1376.67 176.731   2
   3  -3 -15 1456.08 168.402   3
  -3   3  15 1611.12 213.159   4
   3   3 -15 1563.46 170.375   3
   3  -3 -15 1464.61 127.534   8
   3  -3 -15 1605.39 206.407   1
   3  -3 -14 3411.16 302.277   4
  -3  -3  14 2996.66 285.415   1
   3  -3 -14 3068.90 183.518   5
   3  -3 -14 3385.57 292.762   1
   3   3 -14 2934.83 280.521   1
  -3   3  14 2983.62 282.617   4
   3  -3 -14 3081.73 180.796   8
  -3  -3  14 2929.25 174.919   5
  -3   3  14 3305.27 237.801   3
   3   3 -14 3139.29 229.901   3
   3  -3 -14 3420.60 247.887   3
  -3  -3  14 2882.00 247.827   2
  -3  -3  13-5.54598 47.4099   1
  -3   3  13 147.150 52.0238   3
  -3  -3  13 93.1004 31.2513   5
   3  -3 -13 126.196 35.6881   8
   3  -3 -13 193.597 47.1170   5
   3  -3 -13 184.739 72.6321   4
   3  -3 -13 173.131 54.5009   3
  -3   3  13 147.615 58.4436   4
   3   3 -13 44.8792 38.2619   1
   3   3 -13 90.0315 43.7812   3
  -3  -3  13 77.0396 46.9468   2
   3  -3 -12 2791.17 177.814   5
   3  -3 -12 2819.39 208.267   3
  -3  -3  12 2605.55 171.074   5
  -3   3  12 2673.93 197.398   3
   3   3 -12 2523.40 239.284   1
   3   3 -12 2432.53 187.936   3
   3  -3 -12 2486.39 240.930   4
  -3  -3  12 2944.44 259.826   1
  -3   3  12 2491.17 243.443   4
  -3  -3  12 2557.26 212.349   2
   3  -3 -12 2544.07 152.290   8
   3   3 -11 1094.18 151.573   1
   3  -3 -11 993.891 106.789   5
  -3  -3  11 1075.33 108.503   5
   3  -3 -11 970.829 145.986   4
  -3  -3  11 985.710 146.181   1
   3  -3 -11 889.255 87.2856   8
  -3   3  11 723.211 97.5358   3
  -3  -3  11 1010.69 126.544   2
  -3  -3  10 481.113 84.0250   2
  -3   3  10 535.738 81.9095   3
   3  -3 -10 604.786 70.4304   8
  -3  -3  10 477.742 97.2066   1
   3  -3 -10 595.940 111.546   4
   3  -3 -10 623.521 87.3139   5
   3   3 -10 594.133 109.646   1
   3  -3  -9 5629.87 265.794   3
   3   3  -9 6103.73 335.688   8
   3   3  -9 5912.59 328.964   1
   3  -3  -9 5841.26 266.888   5
   3  -3  -9 5924.95 217.186   8
   3  -3  -9 5868.04 333.984   4
  -3  -3   9 6091.96 333.826   1
  -3  -3   9 5979.25 281.383   2
  -3   3   9 5614.64 256.309   3
  -3  -3   8 4811.32 279.930   1
   3  -3  -8 4205.88 216.587   3
  -3   3   8 3987.44 179.984   8
   3  -3  -8 4366.55 276.484   4
   3   3  -8 5043.94 288.242   1
   3   3  -8 4857.57 290.358   8
  -3  -3   8 4949.77 239.438   2
   3  -3  -8 3974.10 173.085   8
  -3   3   8 4312.30 212.275   3
   3  -3  -8 4318.42 225.562   5
   3   3  -7 1690.70 159.999   1
   3  -3  -7 3064.01 175.185   3
   3  -3  -7 2290.68 71.7662   6
   3  -3  -7 2945.49 143.457   8
   3  -3  -7 2844.53 211.746   4
   3  -3  -7 3000.68 185.635   5
  -3  -3   7 1819.53 166.672   1
  -3   3   7 3041.40 153.031   8
  -3   3   7 2979.63 165.437   3
   3   3  -7 1817.43 171.017   8
  -3  -3   7 1925.96 137.781   2
   3   3  -6 2599.43 143.684   2
  -3  -3   6 2563.36 175.215   7
  -3  -3   6 2603.81 149.235   2
   3  -3  -6 2912.33 165.925   3
   3  -3  -6 3177.15 191.486   5
   3  -3  -6 2928.79 210.070   4
  -3  -3   6 2638.22 192.446   1
   3   3  -6 2658.13 190.085   1
  -3   3   6 3113.68 156.061   8
  -3   3   6 3021.27 161.001   3
   3   3  -6 2589.41 199.407   8
   3  -3  -6 2693.97 94.3268   6
  -3   3   5 3144.75 161.189   3
  -3  -3   5 3757.35 217.629   1
   3  -3  -5 3112.02 192.371   5
   3   3  -5 3868.62 156.667   2
   3  -3  -5 3138.05 209.313   4
   3   3  -5 3909.75 218.877   1
   3  -3  -5 3025.61 113.592   6
  -3   3   5 3055.47 156.295   8
  -3  -3   5 3854.97 207.503   7
   3  -3  -5 3045.23 164.807   3
   3   3  -5 3974.40 235.651   8
  -3  -3   5 3736.91 161.611   2
   3   3  -4 98.4357 31.0288   8
   3  -3  -4 203.113 30.5556   6
   3   3  -4 137.675 28.4167   2
  -3   3   4 194.587 40.6624   3
   3  -3  -4 204.091 56.4260   5
   3  -3  -4 178.671 51.7307   4
  -3   3   4 201.430 40.8039   8
  -3  -3   4 141.884 46.3218   1
  -3  -3   4 84.2441 22.9506   2
  -3   3   4 140.753 47.9741   4
  -3  -3   4 77.5877 34.4584   7
   3   3  -4 135.114 40.2401   1
   3   3  -3 1826.15 81.6705   2
   3  -3  -3 2051.29 107.709   6
   3  -3  -3 1978.48 105.740   1
   3  -3  -3 2102.54 157.264   4
  -3  -3   3 1644.84 82.1683   2
   3   3  -3 1783.10 133.391   1
  -3   3   3 2155.01 158.404   4
   3  -3  -3 2329.28 163.742   5
  -3   3   3 2063.72 129.499   8
   3   3  -3 1970.12 147.701   7
  -3  -3   3 1837.51 137.697   7
  -3   3   3 1992.91 124.003   3
   3   3  -3 1780.95 152.732   8
  -3  -3   3 1875.00 142.578   1
  -3  -3   2 6578.81 262.122   7
   3   3  -2 6491.34 137.170   2
   3  -3  -2 6397.69 269.541   4
   3   3  -2 6526.34 247.124   1
  -3  -3   2 6543.73 261.669   1
   3   3  -2 6733.10 216.832   3
   3  -3  -2 6102.17 189.439   1
   3   3  -2 6882.36 292.114   8
  -3   3   2 6127.36 259.825   4
   3   3  -2 6703.84 271.852   7
  -3  -3   2 5822.31 139.738   2
   3  -3  -2 6174.06 271.163   5
   3  -3  -2 5693.10 203.863   6
  -3  -3   1 13747.9 397.407   7
  -3   3   1 14343.7 398.000   4
   3   3  -1 13952.1 333.504   3
   3   3  -1 14022.6 370.287   1
   3  -3  -1 14262.1 427.553   5
   3  -3  -1 14164.4 313.081   1
  -3  -3   1 13905.6 389.956   1
   3   3  -1 14347.7 430.973   8
   3  -3  -1 14411.3 406.433   4
   3   3  -1 14182.6 411.863   7
  -3   3   1 13564.6 384.039   7
   3  -3  -1 13565.3 346.916   6
  -3  -3   0 7312.06 285.967   7
   3  -3   0 5898.05 233.594   6
  -3   3   0 7708.80 277.514   4
   3   3   0 6738.22 242.892   1
   3   3   0 6868.02 229.043   3
   3  -3   0 6906.90 215.606   1
   3  -3   0 7396.87 305.946   5
  -3  -3   0 7615.30 273.725   1
   3  -3   0 6836.00 269.704   4
  -3   3   0 6019.37 189.091   1
  -3   3   0 6475.21 251.157   7
   3   3   0 8625.49 323.216   8
   3   3   0 8432.30 312.682   7
   3   3   1 4451.17 181.916   3
  -3  -3  -1 4436.41 187.703   3
   3  -3   1 5113.89 185.502   1
  -3  -3  -1 4432.83 199.555   1
  -3   3  -1 5214.96 211.473   7
   3  -3   1 5382.56 247.428   5
   3   3   1 4555.55 228.952   7
  -3   3  -1 5166.47 175.572   1
   3   3   1 4303.26 111.783   2
   3  -3   1 5019.74 215.201   4
  -3  -3  -1 4534.67 220.508   7
  -3   3  -1 5234.96 211.383   4
   3   3   1 4409.12 221.365   8
  -3  -3  -1 4628.11 228.476   8
   3   3   2 419.462 59.0160   3
  -3   3  -2 309.735 50.1623   7
  -3  -3  -2 437.554 61.3818   1
  -3  -3  -2 330.967 49.2459   4
  -3  -3  -2 370.795 58.3112   3
   3   3   2 344.048 66.1755   7
   3  -3   2 302.629 63.7922   2
  -3  -3  -2 366.013 63.6137   8
   3   3   2 389.964 64.1872   8
   3  -3   2 302.222 53.2914   4
   3  -3   2 248.687 55.3831   5
   3  -3   2 301.017 48.0697   1
   3   3   2 358.343 36.0218   2
  -3  -3  -2 370.109 66.6933   7
  -3   3  -2 271.653 42.2650   1
   3  -3   2 244.084 46.6207   7
  -3   3  -3 7992.37 263.707   7
   3   3   3 7861.50 320.988   7
  -3  -3  -3 7424.42 272.312   3
  -3  -3  -3 7546.61 274.209   1
   3   3   3 7814.35 217.711   2
  -3   3  -3 8307.31 270.263   1
   3  -3   3 8207.00 310.912   5
  -3   3  -3 8029.82 333.563   2
   3   3   3 7514.99 280.290   8
  -3  -3  -3 7479.42 243.546   4
   3  -3   3 8019.58 273.575   4
   3  -3   3 8193.31 275.679   1
   3  -3   3 8183.49 334.715   2
   3   3   3 7710.93 267.454   3
  -3  -3  -3 7622.68 293.853   8
   3  -3   3 7868.41 270.007   7
   3   3   4 28462.3 678.874   7
  -3   3  -4 26758.0 668.893   2
  -3   3  -4 26838.8 556.339   7
  -3   3  -4 26887.0 591.300   1
   3  -3   4 26895.9 571.424   7
  -3  -3  -4 26963.8 599.050   3
   3  -3   4 25668.1 617.428   5
   3  -3   4 26358.5 667.334   2
   3   3   4 27390.5 590.000   3
  -3  -3  -4 27044.5 532.685   4
   3   3   4 27157.6 589.366   8
   3  -3   4 26921.0 558.026   4
  -3  -3  -4 27156.4 612.497   8
   3   3   4 27659.1 522.016   2
   3  -3   4 25982.4 588.358   1
   3  -3   5 18657.4 447.778   4
  -3   3  -5 18761.8 447.858   7
  -3   3  -5 19663.4 508.146   1
  -3  -3  -5 17278.4 411.969   4
   3  -3   5 19163.2 464.601   7
  -3  -3  -5 17597.0 477.441   8
   3   3   5 17502.5 473.643   3
   3  -3   5 18658.2 554.963   2
  -3  -3  -5 17832.7 486.359   3
  -3   3  -5 19723.5 561.826   2
   3   3   5 18287.1 547.005   7
   3  -3   5 18937.0 503.782   1
   3  -3   5 19135.5 502.438   5
   3   3   5 17251.2 407.640   4
   3   3   5 17987.0 429.957   2
   3   3   6 31246.7 759.389   7
  -3   3  -6 29891.3 699.893   1
   3  -3   6 28636.1 691.312   1
  -3  -3  -6 28634.3 646.218   8
   3   3   6 29861.6 627.642   2
  -3  -3  -6 29158.3 586.578   4
   3   3   6 29110.4 665.349   3
   3  -3   6 29247.6 658.519   5
   3  -3   6 29144.2 742.450   2
   3   3   6 28386.1 579.120   4
  -3   3  -6 29008.9 736.636   2
  -3  -3  -6 30178.0 686.180   3
   3  -3   6 29079.5 625.914   7
   3   3   7 9152.16 398.838   7
  -3  -3  -7 8769.53 351.658   3
  -3   3  -7 8996.54 374.383   1
   3  -3   7 8985.22 334.160   5
   3  -3   7 9258.92 404.092   2
   3   3   7 9074.98 330.670   2
  -3  -3  -7 8868.16 296.105   4
   3  -3   7 9450.16 329.627   7
   3   3   7 8927.53 352.394   3
   3   3   7 8943.90 297.054   4
  -3   3  -7 9502.56 402.025   2
   3  -3   7 8967.20 369.332   1
  -3  -3  -7 9060.79 328.038   8
  -3  -3  -8 8612.22 363.880   3
   3   3   8 8212.54 400.733   7
  -3   3  -8 8759.40 396.896   2
  -3  -3  -8 8709.18 373.466   6
  -3   3  -8 9143.11 397.725   1
  -3  -3  -8 8699.25 305.473   4
  -3  -3  -8 8521.33 321.941   8
   3  -3   8 9403.24 418.794   2
   3   3   8 8740.25 343.340   2
   3   3   8 9245.20 312.977   4
   3   3   8 8585.67 359.777   3
   3  -3   8 8689.36 326.002   5
   3  -3   8 8855.70 331.369   7
   3  -3   9 347.936 64.5891   5
   3   3   9 209.719 57.9101   2
  -3   3  -9 383.634 87.2350   1
  -3  -3  -9 221.361 63.8374   6
  -3  -3  -9 209.105 49.9278   8
  -3  -3  -9 183.612 48.3752   4
  -3  -3  -9 209.159 61.5034   3
   3   3   9 269.547 80.9890   7
   3  -3   9 495.157 90.0102   6
   3   3   9 152.069 46.0826   3
   3   3   9 176.491 47.2643   4
   3  -3   9 336.731 69.3573   7
   3  -3   9 324.518 81.3141   2
  -3   3  -9 357.904 84.0963   2
   3  -3  10 1870.91 164.088   7
  -3   3 -10 1979.07 200.044   1
  -3  -3 -10 1893.68 181.040   6
  -3   3 -10 1687.01 182.244   2
  -3  -3 -10 1888.03 151.786   4
  -3  -3 -10 1777.00 148.161   8
  -3  -3 -10 1925.53 180.145   3
   3  -3  10 1986.22 202.380   2
   3  -3  10 1826.74 179.102   6
   3   3  10 1823.92 145.204   4
   3   3  10 1897.41 191.847   7
   3   3  10 1828.13 171.433   2
  -3  -3 -10 1742.20 144.154   5
   3   3  10 1841.27 175.690   3
   3  -3  10 1763.43 140.632   5
  -3  -3 -11 329.245 66.3001   8
   3  -3  11 461.786 88.1598   7
  -3  -3 -11 367.494 70.4355   4
   3  -3  11 535.866 103.020   6
   3   3  11 305.550 73.9754   3
  -3  -3 -11 376.511 83.1418   6
   3  -3  11 507.104 75.3308   5
  -3  -3 -11 344.723 64.0797   5
  -3   3 -11 547.130 103.307   3
  -3   3 -11 611.082 120.770   1
   3   3  11 339.522 66.4535   4
   3  -3  11 568.626 115.073   2
   3   3  11 353.553 90.8454   7
   3   3  11 354.505 78.9776   2
  -3  -3 -11 301.923 78.3722   3
  -3   3 -11 427.350 91.8331   2
   3   3  12 270.220 73.8502   2
  -3  -3 -12 229.448 67.9839   3
  -3   3 -12 262.642 87.4341   2
   3   3  12 216.542 82.9173   7
  -3   3 -12 243.532 73.2124   3
   3  -3  12 261.179 70.4115   6
  -3  -3 -12 169.339 62.0199   6
  -3  -3 -12 198.494 47.7421   5
  -3   3 -12 232.645 77.2300   1
   3  -3  12 314.769 90.3463   2
   3  -3  12 184.458 55.9127   7
   3   3  12 259.638 64.9574   4
   3  -3  12 303.121 59.3211   5
   3   3  12 242.312 76.2004   3
   3   3  13 63.9169 38.8139   2
  -3   3 -13 122.384 60.8704   2
   3  -3  13 205.057 68.2299   6
  -3  -3 -13 149.117 47.9044   3
  -3   3 -13 213.435 85.3573   1
   3  -3  13 167.728 44.4814   5
   3   3  13 69.0882 50.8587   7
  -3   3 -13 113.759 48.0329   3
  -3  -3 -13 122.664 45.9549   6
   3  -3  13 197.621 62.3046   7
  -3  -3 -13 64.2843 28.8177   5
  -3  -3 -14 2459.25 243.331   3
  -3   3 -14 2522.94 253.972   2
   3   3  14 2622.03 261.487   7
   3  -3  14 2435.80 152.168   5
  -3   3 -14 2545.50 246.924   3
   3   3  14 2471.21 235.655   2
  -3  -3 -14 2341.51 157.040   5
   3  -3  14 2481.18 224.667   7
  -3  -3 -14 2522.94 225.511   6
   3  -3  15 330.558 90.1702   7
  -3  -3 -15 372.523 103.058   3
   3   3  15 565.018 131.560   7
  -3   3 -15 413.301 108.653   2
  -3  -3 -15 427.550 63.9952   5
   3   3  15 327.923 76.2131   4
  -3  -3 -15 286.953 69.9920   8
   3  -3  15 428.752 95.8654   4
  -3   3 -15 469.208 109.266   3
   3  -3  15 329.952 53.4639   5
  -3  -3 -15 331.511 84.7920   6
  -3   3 -16 3235.65 304.048   2
  -3  -3 -16 3032.91 285.252   3
   3   3  16 2885.80 288.706   7
  -3  -3 -16 2742.73 242.141   6
  -3  -3 -16 2431.26 202.599   8
  -3   3 -16 2868.22 278.276   3
   3  -3  16 2790.45 242.539   4
  -3  -3 -16 2586.84 145.931   5
   3  -3  16 2529.74 250.144   7
   3   3  16 2583.69 220.992   4
  -3   3 -17 2255.83 267.437   2
   3  -3  17 2167.30 219.813   4
   3  -3  17 1996.52 233.035   7
   3   3  17 2166.11 254.992   7
  -3  -3 -17 2244.93 253.306   3
  -3  -3 -17 2084.84 220.213   6
   3   3  17 2121.87 209.421   4
  -3  -3 -17 1828.08 176.934   8
  -3   3 -17 2382.57 260.083   3
  -3   3 -18 3077.43 308.620   3
  -3  -3 -18 3293.95 322.966   3
   3  -3  18 3141.83 294.116   7
   3   3  18 3533.00 336.017   7
   3   3  18 3045.86 259.682   4
  -3   3 -18 3231.95 324.246   2
   3  -3  18 3367.98 284.585   4
  -3  -3 -18 3409.67 284.323   6
   3  -3  19 124.135 64.7450   7
   3   3  19 86.0557 62.6428   7
  -3  -3 -19-4.16032 41.7187   6
   3  -3  19 172.052 69.1745   4
   3   3  19 24.5334 29.8706   4
  -3   3 -19 174.538 74.5464   3
  -3  -3 -19 65.0986 34.1704   3
  -3   3 -19 176.439 103.042   2
   3   3  20 3263.19 283.727   4
   3  -3  20 3474.56 323.861   7
  -3   3 -20 3463.28 366.681   2
  -3  -3 -20 3226.60 292.837   6
  -3  -3 -20 3434.25 349.007   3
  -3   3 -20 4037.05 371.942   3
   3   3  20 3462.77 351.296   7
   3  -3  20 3790.83 318.540   4
   3  -3  21 1395.35 214.868   7
   3   3  21 1328.09 233.884   7
  -3  -3 -21 1508.94 202.725   6
  -3  -3 -21 1576.26 240.857   3
   3  -3  21 1720.04 227.967   4
   3   3  21 1305.45 183.812   4
  -3   3 -21 2019.02 268.514   3
  -3  -3 -22 1349.57 195.819   6
   3  -3  22 1218.83 198.998   7
   3  -3  23 112.118 82.3226   7
   3  -3  24 453.669 135.652   7
   3   4 -25 145.585 75.9309   8
   3  -4 -24-47.2680 61.8280   3
   3   4 -24 120.020 67.5507   8
   3   4 -24-67.1563 58.0906   3
   3   4 -23 67.7681 64.3458   3
   3  -4 -23-37.4441 74.3900   3
  -3  -4  23 87.6329 77.4201   4
  -3   4  22 93.6914 78.7858   4
   3  -4 -22 107.309 64.1364   3
  -3  -4  22 111.937 80.2884   4
   3   4 -22 61.4215 51.5408   3
   3  -4 -21 222.325 86.7174   3
  -3  -4  21 298.063 125.096   4
  -3   4  21 275.013 135.400   4
   3   4 -21 250.757 87.1249   3
   3  -4 -20 355.072 102.993   3
  -3  -4  20 173.345 94.7634   4
  -3   4  20 385.332 126.413   4
   3   4 -20 147.759 67.4033   3
  -3  -4  19 3086.06 344.469   4
  -3  -4  19 2899.59 227.892   6
   3  -4 -19 3639.98 316.028   3
   3   4 -19 3092.78 278.678   3
   3  -4 -19 3307.83 175.132   5
  -3   4  19 3708.14 372.296   4
   3  -4 -19 2882.10 166.631   8
  -3  -4  18 3268.77 174.623   5
   3  -4 -18 4064.21 207.022   5
   3  -4 -18 4521.73 340.592   3
  -3  -4  18 4067.86 266.028   6
   3   4 -18 3952.95 304.327   3
  -3  -4  18 4365.45 393.200   4
   3  -4 -18 4006.68 193.830   8
  -3   4  18 4712.71 410.279   4
  -3  -4  17 2269.68 193.737   6
   3  -4 -17 2869.25 262.565   3
  -3  -4  17 2562.82 296.525   1
  -3  -4  17 2177.32 149.983   5
   3  -4 -17 2386.42 144.777   8
   3   4 -17 2144.99 222.739   3
  -3   4  17 2541.66 291.998   4
   3  -4 -17 2513.59 169.596   5
  -3   4  16 3309.40 321.805   4
  -3  -4  16 3377.00 331.402   1
  -3  -4  16 3006.89 184.432   5
   3   4 -16 2679.35 235.328   3
   3  -4 -16 3220.63 198.380   5
   3  -4 -16 3294.27 270.374   3
   3  -4 -16 2981.95 157.845   8
   3  -4 -15 1230.25 124.512   5
   3  -4 -15 1068.85 150.807   3
  -3   4  15 1147.36 149.237   3
  -3  -4  15 986.396 108.022   5
   3   4 -15 960.587 140.424   3
  -3   4  15 1380.21 202.727   4
  -3  -4  15 961.441 169.182   1
  -3  -4  15 1171.40 170.338   2
   3  -4 -15 1175.45 94.4506   8
   3  -4 -14 1678.05 181.397   3
  -3  -4  14 1518.14 136.273   5
   3  -4 -14 1631.92 108.139   8
   3   4 -14 1394.11 158.162   3
  -3   4  14 1848.00 226.120   4
  -3  -4  14 1466.12 180.963   2
   3  -4 -14 1745.50 150.490   5
  -3   4  14 1884.67 185.654   3
  -3  -4  14 1484.21 207.052   1
   3  -4 -13 3631.74 159.185   8
   3  -4 -13 4141.59 274.486   3
  -3   4  13 4107.75 264.984   3
   3  -4 -13 3980.65 231.530   5
   3  -4 -13 3936.46 317.027   4
  -3   4  13 4379.84 335.940   4
  -3  -4  13 3922.99 282.463   2
   3   4 -13 4041.82 322.997   1
  -3  -4  13 4376.38 342.180   1
   3  -4 -12 5088.34 295.503   3
   3   4 -12 4633.21 336.702   1
   3  -4 -12 5579.71 372.188   4
  -3   4  12 5125.56 357.563   4
  -3  -4  12 4288.02 284.703   2
   3   4 -12 4297.07 271.829   2
   3  -4 -12 5002.22 182.149   8
  -3  -4  12 4116.15 320.384   1
   3  -4 -12 4944.06 262.596   5
  -3   4  12 5180.88 288.008   3
  -3  -4  11 14708.5 597.936   1
   3   4 -11 15075.1 501.531   2
   3   4 -11 14855.4 596.491   1
   3  -4 -11 13608.3 323.792   8
   3  -4 -11 14062.6 497.589   3
  -3  -4  11 14739.5 518.743   2
   3  -4 -11 13986.9 585.909   4
  -3   4  11 13698.4 579.638   4
  -3   4  11 13915.4 473.091   3
   3  -4 -11 14641.6 467.030   5
   3  -4 -10 345.825 72.9035   5
  -3  -4  10 84.6713 49.5030   1
   3  -4 -10 300.762 84.2838   4
  -3   4  10 315.468 66.8608   3
   3   4 -10 191.459 66.5139   1
  -3  -4  10 106.146 48.2312   2
   3  -4 -10 222.642 21.2835   6
  -3   4   9 20713.2 556.904   3
   3  -4  -9 21189.3 687.411   4
   3   4  -9 20363.3 668.743   1
   3  -4  -9 21320.1 583.242   5
  -3  -4   9 20348.7 570.322   2
[truncated: 886,686 more chars]
